# Supplementary material for: DNA methylation meta-analysis reveals cellular alterations in psychosis and markers of treatment-resistant schizophrenia
Source: eLife journal article supplement (doi:10.7554/elife.58430), 2021-02-26
Supplement: supp [file elife-58430-supp-v1.zip]

Archive with 17 entries (17 files):
- elife_poa_e58430_Supplementary_file_1.xlsx
- elife_poa_e58430_Transparent_Reporting_File.docx
- elife_poa_e58430_Figure_1_figure_supplement_1.pdf
- elife_poa_e58430_Figure_1_figure_supplement_2.pdf
- elife_poa_e58430_Figure_1_figure_supplement_3.pdf
- elife_poa_e58430_Figure_1_figure_supplement_4.pdf
- elife_poa_e58430_Figure_1_figure_supplement_5.pdf
- elife_poa_e58430_Figure_1_figure_supplement_6.pdf
- elife_poa_e58430_Figure_2_figure_supplement_1.pdf
- elife_poa_e58430_Figure_2_figure_supplement_2.eps
- elife_poa_e58430_Figure_2_figure_supplement_3.eps
- elife_poa_e58430_Figure_3_figure_supplement_1.pdf
- elife_poa_e58430_Figure_3_figure_supplement_2.pdf
- elife_poa_e58430_Figure_3_figure_supplement_3.pdf
- elife_poa_e58430_Figure_4_figure_supplement_1.eps
- elife_poa_e58430_Figure_8_figure_supplement_1.pdf
- elife_poa_e58430_Figure_8_figure_supplement_2.pdf
