# Supplementary material for: DNA methylation meta-analysis reveals cellular alterations in psychosis and markers of treatment-resistant schizophrenia
Source: eLife journal article supplement (doi:10.7554/elife.58430), 2021-02-26
Supplement: supp [file elife-58430-supp-v1.zip › elife_poa_e58430_Supplementary_file_1.xlsx]

## Sheet: Supplementary Table 1
Supplementary Table 1. Results of meta-analysis of DNA methylation estimated cellular composition differences between schizophrenia cases and controls.
Cell type	Measure type	Number of cohorts	Schizophrenia cases vs controls
			Random effects model			Fixed effects model			Heterogeneity P value
			Mean difference	SE	P value	Mean difference	SE	P value
Monocytes	Proportion	7	0.00306345	0.0010207	0.0026881	0.00304404	0.000999117	0.00231347	0.398126
Granulocytes	Proportion	7	0.0467901	0.0136026	0.000582148	0.0503143	0.0037642	9.4889e-41	4.14777e-11
Natural Killer cells	Proportion	7	-0.0134034	0.00437008	0.0021615	-0.0110212	0.00155255	1.25902e-12	1.57128e-06
CD4+ T-cells	Proportion	7	-0.0197886	0.00635706	0.0018529	-0.0202603	0.00245315	1.47065e-16	1.63661e-05
CD8+ T-cells	Proportion	7	-0.0177007	0.00393479	6.84331e-06	-0.0198666	0.00176215	1.76246e-29	0.000399601
B-cells	Proportion	7	-0.00392826	0.00406121	0.333413	-0.00483524	0.00123592	9.1442e-05	1.9844e-09
PlasmaBlast	Abundance	5	0.0597361	0.0249607	0.0167017	0.0650376	0.00759081	1.0535e-17	1.01259e-07
CD8pCD28nCD45RAn	Abundance	5	0.158852	0.186312	0.393872	0.192504	0.157153	0.220594	0.26878
CD8.naive T-cells	Abundance	5	7.50605	3.20207	0.0190719	8.49085	1.9767	1.74322e-05	0.0555591
CD4.naive T-cells	Abundance	5	15.0428	4.98825	0.00256427	15.0428	4.98825	0.00256427	0.543339

## Sheet: Supplementary Table 2
Supplementary Table 2: Significant differentially methylated positions (DMPs) associated with psychosis.
Probe ID	CHR	MAPINFO	UCSC_RefGene		Relation_to_UCSC_CpG_Island	N_cohorts	Meta-analysis							UCL		Aberdeen		Twins		IoPPN		Dublin		EUGEI		Sweden
							Random effects model			Fixed effects model			Heterogeneity P value	Mean difference	SE	Mean difference	SE	Mean difference	SE	Mean difference	SE	Mean difference	SE	Mean difference	SE	Mean difference	SE
			Name	Group			Mean difference	SE	P value	Mean difference	SE	P value
cg00089453	5	150003037	SYNPO;SYNPO	Body;Body	N_Shore	7	0.472629	0.0794562	2.70937e-09	0.472629	0.0794562	2.70937e-09	0.63772	6	0.913944	0.249759	0.330876	0.193062	0.46542	0.321109	0.441904	0.195021	0.522415	0.219781	0.452769	0.145533	0.258771	0.293258
cg00390724	3	18484742			N_Shore	7	-1.34793	0.22806	3.41223e-09	-1.34793	0.22806	3.41223e-09	0.955403	6	-1.86351	0.762772	-1.67034	0.542284	-0.937122	0.822952	-1.08034	0.580924	-1.44481	0.675649	-1.33222	0.42258	-0.971175	0.729914
cg00517261	12	323801	SLC6A12;SLC6A12;SLC6A12	TSS1500;TSS1500;TSS1500		7	0.663549	0.117278	1.53241e-08	0.663549	0.117278	1.53241e-08	0.437705	6	1.13865	0.402179	0.867585	0.281443	1.18932	0.414317	0.673632	0.358652	0.488901	0.32294	0.512098	0.212238	0.238427	0.342807
cg00608540	5	180627973	TRIM7;TRIM7;TRIM7;TRIM7;TRIM7	TSS200;Body;5'UTR;5'UTR;5'UTR	N_Shelf	7	0.704943	0.131701	8.67025e-08	0.691429	0.121904	1.41227e-08	0.33947	6	0.97672	0.402934	0.760456	0.281294	0.311999	0.485066	1.23522	0.349539	0.759319	0.341227	0.305331	0.226661	0.874332	0.353413
cg00667298	6	29576329	GABBR1;GABBR1;GABBR1	Body;Body;Body		7	0.619216	0.105939	5.06563e-09	0.619216	0.105939	5.06563e-09	0.880357	6	0.805111	0.35192	0.724984	0.247481	0.147898	0.431629	0.762432	0.288232	0.672695	0.299068	0.597922	0.215629	0.443833	0.261645
cg00830621	16	18799106	RPS15A;RPS15A	Body;Body	N_Shelf	5	1.29771	0.214561	1.46463e-09	1.34591	0.15335	1.68347e-18	0.109263	4	1.42228	0.363882	1.84308	0.292824	0.344397	0.478673	1.19952	0.307107	1.29172	0.346232	NA	NA	NA	NA
cg01262865	16	75282094	BCAR1;BCAR1;BCAR1;BCAR1;BCAR1;BCAR1;BCAR1;BCAR1;BCAR1	Body;5'UTR;Body;Body;Body;1stExon;Body;Body;Body	N_Shelf	7	0.456752	0.083931	5.26853e-08	0.456752	0.083931	5.26853e-08	0.571011	6	0.677087	0.247025	0.651835	0.216365	0.889758	0.365172	0.341455	0.208424	0.482297	0.234671	0.281808	0.15111	0.356784	0.291901
cg01475325	11	76498701	TSKU	5'UTR	S_Shelf	7	0.691761	0.125569	3.60867e-08	0.704633	0.111442	2.56767e-10	0.286897	6	0.426986	0.379149	1.23313	0.243876	0.435373	0.407354	0.445084	0.2905	0.82134	0.312261	0.658229	0.224312	0.415162	0.338192
cg01526089	17	3819390	P2RX1	1stExon		7	-0.462131	0.0816902	1.5393e-08	-0.462131	0.0816902	1.5393e-08	0.549919	6	-0.528497	0.25811	-0.569052	0.182541	0.0094362	0.436453	-0.661264	0.176107	-0.527892	0.241296	-0.325762	0.166296	-0.151543	0.267254
cg01833890	12	2564063	CACNA1C;CACNA1C;CACNA1C;CACNA1C;CACNA1C;CACNA1C;CACNA1C;CACNA1C;CACNA1C;CACNA1C;CACNA1C;CACNA1C;CACNA1C;CACNA1C;CACNA1C;CACNA1C;CACNA1C;CACNA1C;CACNA1C;CACNA1C;CACNA1C;CACNA1C;CACNA1C	Body;Body;Body;Body;Body;Body;Body;Body;Body;Body;Body;Body;Body;Body;Body;Body;Body;Body;Body;Body;Body;Body;Body		7	0.458253	0.0795588	8.41533e-09	0.458253	0.0795588	8.41533e-09	0.621112	6	0.416925	0.231284	0.430237	0.170311	0.755137	0.366782	0.728913	0.188613	0.492049	0.226788	0.262701	0.157711	0.367721	0.322297
cg02327719	1	26185386	C1orf135	Body	N_Shore	7	0.537938	0.100075	7.64446e-08	0.537938	0.100075	7.64446e-08	0.638267	6	0.548753	0.324138	0.774107	0.232297	0.857342	0.429225	0.453002	0.264978	0.506207	0.293951	0.548236	0.179518	0.0177196	0.323992
cg02589353	11	124471596				5	1.17308	0.179604	6.51219e-11	1.18504	0.163687	4.49815e-13	0.319115	4	0.944556	0.367198	1.56472	0.281734	1.5792	0.473744	0.789629	0.433185	0.832907	0.364592	NA	NA	NA	NA
cg02743674	11	2433468	TRPM5	Body	N_Shore	7	0.564941	0.0991075	1.19605e-08	0.557912	0.0874012	1.73265e-10	0.283201	6	0.744145	0.315917	1.0421	0.225459	0.673132	0.31908	0.551051	0.216313	0.302043	0.248502	0.416598	0.16404	0.379025	0.244951
cg03012821	2	86848899	RNF103	Body	N_Shore	7	-0.323499	0.0587321	3.62822e-08	-0.323499	0.0587321	3.62822e-08	0.878076	6	-0.184117	0.186405	-0.221818	0.127308	-0.529818	0.219824	-0.385286	0.155375	-0.377762	0.182662	-0.354208	0.11209	-0.301359	0.189862
cg03058346	1	91275170				5	1.11814	0.181591	7.39309e-10	1.11814	0.181591	7.39309e-10	0.678489	4	0.934848	0.430098	1.40772	0.381583	1.58574	0.490141	0.874606	0.346638	0.953299	0.423825	NA	NA	NA	NA
cg03224126	15	72491032	GRAMD2	TSS1500	S_Shore	7	0.623466	0.11345	3.89594e-08	0.623466	0.11345	3.89594e-08	0.720786	6	0.414818	0.383838	0.858506	0.249481	0.138618	0.981568	0.332771	0.290025	0.661307	0.316973	0.814826	0.226152	0.420454	0.283883
cg03247245	12	67272574				7	0.678424	0.12243	3.00182e-08	0.678424	0.12243	3.00182e-08	0.83076	6	0.497015	0.398752	1.02078	0.307289	0.828556	0.389072	0.459153	0.335983	0.482032	0.373834	0.603681	0.214747	0.948151	0.425188
cg03517226	16	89408322	ANKRD11	5'UTR	Island	7	0.662295	0.106821	5.64448e-10	0.662295	0.106821	5.64448e-10	0.7338	6	1.01904	0.352905	0.785856	0.238833	0.411438	0.429777	0.976421	0.356816	0.441063	0.297211	0.632636	0.20932	0.460555	0.261138
cg03707955	15	61237076	RORA	Body		5	0.731413	0.123368	3.05299e-09	0.731413	0.123368	3.05299e-09	0.814546	4	0.70084	0.327966	0.887566	0.230248	0.946688	0.342685	0.561123	0.248296	0.596173	0.279409	NA	NA	NA	NA
cg04321224	21	46341380	ITGB2;ITGB2	5'UTR;TSS1500		7	0.740552	0.131323	1.70896e-08	0.740552	0.131323	1.70896e-08	0.580897	6	1.21691	0.408006	1.12316	0.336646	0.606432	0.443061	0.692045	0.355832	0.805858	0.404458	0.606986	0.238262	0.240429	0.394243
cg04415297	1	231243034				5	1.03488	0.168847	8.83691e-10	1.03488	0.168847	8.83691e-10	0.631931	4	0.924798	0.398892	1.23649	0.345104	0.459762	0.463595	0.987095	0.343485	1.32113	0.370973	NA	NA	NA	NA
cg04425005	4	146783253	ZNF827	Body		7	0.622198	0.0957542	8.14671e-11	0.622198	0.0957542	8.14671e-11	0.661912	6	0.360327	0.268498	0.678872	0.209288	0.560088	0.432604	0.975111	0.264891	0.818158	0.274001	0.451081	0.196994	0.581278	0.270373
cg04813697	10	22920025	PIP4K2A	Body		7	1.26564	0.189299	2.29452e-11	1.2548	0.181434	4.64515e-12	0.379126	6	2.16117	0.603229	1.81963	0.462503	0.759643	0.701366	1.16393	0.432173	1.42409	0.526096	0.786823	0.329968	1.27229	0.600775
cg05233324	2	8628196				7	0.985697	0.172913	1.19423e-08	0.980241	0.167349	4.69949e-09	0.388936	6	1.09435	0.549451	1.08073	0.38597	0.859731	0.634758	1.7135	0.474825	0.361219	0.457851	0.697494	0.307281	1.55073	0.542031
cg05439368	15	45028098	TRIM69;TRIM69	TSS1500;TSS1500		7	0.955399	0.158368	1.61176e-09	0.955399	0.158368	1.61176e-09	0.782451	6	1.03692	0.483873	1.17007	0.380363	1.31306	0.55138	1.28445	0.407498	0.707626	0.448913	0.591657	0.300777	1.0328	0.545449
cg07068655	8	12633029	LOC340357	Body		5	1.01837	0.185144	3.78897e-08	1.02158	0.168615	1.37297e-09	0.316896	4	0.957131	0.440045	1.49184	0.310498	1.23359	0.52235	0.536661	0.334075	0.882189	0.37767	NA	NA	NA	NA
cg07163480	2	236007482				5	0.770541	0.138069	2.39383e-08	0.770541	0.138069	2.39383e-08	0.575993	4	0.665024	0.355018	0.958952	0.260844	1.04435	0.408265	0.412076	0.274749	0.881518	0.307453	NA	NA	NA	NA
cg07970325	6	106497542				6	0.666102	0.109362	1.12333e-09	0.666102	0.109362	1.12333e-09	0.438941	5	1.14488	0.339783	0.829961	0.243835	0.709393	0.395747	NA	NA	0.681212	0.291835	0.568995	0.180155	0.19135	0.3298
cg08080174	16	72992580	ZFHX3;ZFHX3	Body;5'UTR	N_Shore	7	0.826333	0.153795	7.74531e-08	0.822756	0.136228	1.54535e-09	0.27931	6	1.51973	0.387251	1.09936	0.316811	0.788473	0.494875	0.855751	0.321721	0.806847	0.376145	0.406749	0.291801	0.272551	0.461427
cg08529744	1	151818922				5	0.820004	0.128745	1.90024e-10	0.82148	0.112682	3.09321e-13	0.284519	4	1.01656	0.281734	1.10643	0.204369	0.85747	0.419675	0.509714	0.218236	0.63242	0.253653	NA	NA	NA	NA
cg08550394	16	4013659	ADCY9	3'UTR	N_Shore	5	1.18644	0.217517	4.91219e-08	1.18593	0.216433	4.26747e-08	0.401296	4	1.47145	0.494197	0.828516	0.406779	2.03265	0.737599	1.47349	0.428296	0.641826	0.505058	NA	NA	NA	NA
cg08839272	3	42730382	KBTBD5	Body	S_Shelf	7	0.576779	0.103969	2.89577e-08	0.576779	0.103969	2.89577e-08	0.610914	6	0.688424	0.35446	0.920375	0.233692	0.482425	0.450293	0.277017	0.239171	0.620398	0.273086	0.586832	0.215368	0.319858	0.335974
cg09108532	11	76481977				7	0.709714	0.131764	7.19427e-08	0.709401	0.108754	6.89095e-11	0.218615	6	0.963757	0.382488	1.25141	0.239933	0.72181	0.620422	0.643957	0.25355	0.577844	0.295696	0.447279	0.219215	0.386729	0.317111
cg09121339	2	7571733			S_Shore	5	0.95124	0.1592	2.29934e-09	0.951428	0.158577	1.97589e-09	0.402313	4	1.37255	0.42411	1.17169	0.302289	0.534	0.492499	1.0257	0.305739	0.498355	0.344155	NA	NA	NA	NA
cg09360044	2	68557960				5	1.11661	0.178945	4.37738e-10	1.14205	0.150044	2.71166e-14	0.243506	4	1.04445	0.339277	1.65201	0.274091	0.659079	0.566689	0.994101	0.303153	0.806538	0.344528	NA	NA	NA	NA
cg09400037	16	84822801				7	1.12505	0.191325	4.09533e-09	1.1249	0.188587	2.44809e-09	0.406715	6	1.2774	0.675567	0.189036	0.48873	1.14867	0.560247	1.6571	0.475629	0.886666	0.524014	1.16834	0.365741	1.68806	0.575822
cg09660867	5	148785816	LOC728264	TSS1500		5	0.863967	0.160289	7.04413e-08	0.863967	0.160289	7.04413e-08	0.833434	4	1.03087	0.397427	1.11553	0.309493	0.744994	0.483162	0.683597	0.318688	0.689732	0.353099	NA	NA	NA	NA
cg09803904	15	89939709	LOC254559	Body	N_Shelf	7	0.719026	0.116361	6.43954e-10	0.719026	0.116361	6.43954e-10	0.937973	6	1.07296	0.39167	0.489229	0.293442	0.517364	0.429851	0.842085	0.348585	0.751621	0.321082	0.73	0.205206	0.703211	0.34031
cg09839177	4	124791563	LOC285419	Body		5	0.860213	0.148	6.16367e-09	0.860213	0.148	6.16367e-09	0.420809	4	0.760775	0.336549	1.28219	0.274444	0.948442	0.484745	0.642529	0.297585	0.529986	0.353547	NA	NA	NA	NA
cg09868768	2	70188605	ASPRV1	1stExon	Island	7	0.878369	0.146415	1.98347e-09	0.878369	0.146415	1.98347e-09	0.705603	6	1.00481	0.487239	0.566865	0.338611	1.29955	0.613193	0.774333	0.378778	1.34301	0.42362	0.651467	0.291624	1.155	0.384818
cg10160630	11	64789409	ARL2	3'UTR		7	0.574512	0.102073	1.81869e-08	0.574512	0.102073	1.81869e-08	0.746128	6	0.297339	0.295279	0.686468	0.232767	0.713654	0.597983	0.339432	0.258615	0.917519	0.28129	0.577672	0.193421	0.554237	0.334519
cg11067407	11	113599852				7	0.591606	0.100633	4.13169e-09	0.591606	0.100633	4.13169e-09	0.809008	6	0.705677	0.312485	0.512888	0.266657	0.707764	0.395907	0.24078	0.251189	0.556316	0.309931	0.743834	0.180775	0.633315	0.298791
cg11828203	7	31014714	GHRHR;GHRHR	Body;Body		7	0.507266	0.0925301	4.2012e-08	0.507266	0.0925301	4.2012e-08	0.715458	6	0.496044	0.323443	0.578484	0.208595	0.217158	0.506726	0.764129	0.21901	0.634312	0.249642	0.281271	0.179625	0.444013	0.283133
cg11915672	6	41103849	LOC221442	Body		7	0.609722	0.0988398	6.88123e-10	0.609722	0.0988398	6.88123e-10	0.480676	6	0.609132	0.325637	1.07018	0.238284	0.461998	0.374962	0.457785	0.259524	0.713932	0.289795	0.40671	0.191085	0.575706	0.266647
cg12127159	7	33809972				5	0.752702	0.13655	3.54245e-08	0.752702	0.13655	3.54245e-08	0.426168	4	0.798102	0.342491	1.09042	0.256304	0.592853	0.389335	0.389247	0.265202	0.829273	0.332089	NA	NA	NA	NA
cg12641739	1	235062535				7	0.636764	0.109781	6.61814e-09	0.636764	0.109781	6.61814e-09	0.484457	6	0.736054	0.342305	0.982248	0.260802	1.13738	0.411513	0.62056	0.266343	0.477946	0.336321	0.469276	0.228359	0.292171	0.292103
cg13059136	11	2986541	SNORA54;NAP1L4	TSS1500;Body		7	0.92603	0.164334	1.74995e-08	0.92603	0.164334	1.74995e-08	0.785076	6	0.989429	0.523689	1.03591	0.40382	0.244336	0.555409	0.750342	0.431266	1.23898	0.50484	1.1319	0.295239	0.511896	0.55586
cg13358873	2	69271042	ANTXR1;ANTXR1;ANTXR1	Body;Body;Body		7	0.795468	0.142989	2.64958e-08	0.795468	0.142989	2.64958e-08	0.68781	6	0.938535	0.429401	1.011	0.333031	1.38984	0.72343	0.947108	0.45082	0.926724	0.37655	0.371464	0.270006	0.837562	0.381541
cg13462082	7	106820841	HBP1	Body		7	0.803314	0.133831	1.94357e-09	0.803314	0.133831	1.94357e-09	0.462049	6	1.15388	0.424862	1.08869	0.298418	1.48642	0.563734	0.869309	0.413386	0.336148	0.38511	0.675506	0.250843	0.466655	0.366874
cg13709487	3	100322493				7	1.05305	0.175722	2.06406e-09	1.05305	0.175722	2.06406e-09	0.647971	6	1.49983	0.570543	1.21071	0.381662	1.56846	0.823829	1.65272	0.611405	1.07345	0.488798	0.813487	0.319916	0.462925	0.479828
cg14064762	9	123688745	TRAF1	5'UTR	N_Shelf	7	0.666873	0.114433	5.62145e-09	0.6677	0.110417	1.47478e-09	0.384288	6	0.507907	0.382581	1.01338	0.235388	0.575981	0.374654	1.11403	0.323819	0.350314	0.300215	0.505199	0.215184	0.44699	0.358299
cg14217091	14	103285756	TRAF3;TRAF3;TRAF3	5'UTR;5'UTR;5'UTR		7	0.822171	0.143912	1.10994e-08	0.804027	0.123063	6.42742e-11	0.244408	6	0.800654	0.398827	0.958344	0.273285	1.85052	0.482543	1.03508	0.328899	0.625614	0.339006	0.489411	0.248665	0.547796	0.354859
cg14384960	4	146807291	ZNF827	Body		7	0.664727	0.123741	7.78984e-08	0.664727	0.123741	7.78984e-08	0.444332	6	0.977808	0.397044	0.235452	0.286385	0.256854	0.46625	0.882034	0.31066	1.00837	0.347813	0.546328	0.250075	0.919557	0.363822
cg14389122	15	74945851	EDC3;EDC3;EDC3	Body;Body;Body		7	-0.794158	0.129807	9.47535e-10	-0.794158	0.129807	9.47535e-10	0.553431	6	-1.05813	0.405138	-1.01369	0.334365	-0.412297	0.470205	-1.22558	0.368659	-1.00679	0.409882	-0.486681	0.235233	-0.707566	0.344911
cg14524754	17	80925103	B3GNTL1	Body	N_Shelf	7	0.814453	0.149922	5.55721e-08	0.814453	0.149922	5.55721e-08	0.724703	6	0.838203	0.473672	0.535201	0.381933	1.26665	0.528446	0.802712	0.376711	0.617556	0.434142	1.1061	0.28356	0.3339	0.456053
cg14711869	4	2716524	FAM193A	Body		7	0.835806	0.148713	1.90679e-08	0.823387	0.125499	5.34856e-11	0.225787	6	0.931395	0.407966	1.26083	0.287633	1.50158	0.415681	0.78693	0.32945	0.592468	0.332442	0.446736	0.256812	0.544482	0.402099
cg14790000	5	127805611	FBN2	Body		5	1.02321	0.170934	2.15052e-09	1.02321	0.170934	2.15052e-09	0.800761	4	1.06501	0.39163	1.25543	0.339879	1.09164	0.498923	0.670319	0.33676	1.1124	0.401187	NA	NA	NA	NA
cg14868222	6	31548340	LTB;LTB	3'UTR;3'UTR	N_Shore	7	0.785431	0.134231	4.87681e-09	0.785431	0.134231	4.87681e-09	0.900795	6	0.658417	0.410494	1.16812	0.343517	0.877233	0.459358	0.572201	0.303664	0.792032	0.373659	0.81988	0.266258	0.515308	0.485675
cg14995235	10	128887795	DOCK1	Body		7	0.614848	0.10446	3.95732e-09	0.613314	0.100286	9.61685e-10	0.380576	6	0.890804	0.323023	1.00745	0.233249	0.402614	0.492374	0.397853	0.247833	0.772623	0.287054	0.455997	0.187704	0.329194	0.307997
cg15320998	7	148936039	ZNF212	TSS1500	N_Shore	7	0.964286	0.165235	5.35171e-09	0.964286	0.165235	5.35171e-09	0.45797	6	0.255055	0.560373	0.874118	0.402552	1.13809	0.553967	1.1796	0.40614	0.8511	0.465154	0.774132	0.318097	1.93536	0.538743
cg15832662	11	63448437	RTN3;RTN3;RTN3;RTN3	TSS1500;TSS1500;TSS1500;TSS1500	N_Shore	7	0.788478	0.143075	3.56903e-08	0.780098	0.121065	1.16631e-10	0.230628	6	0.795913	0.408993	1.16834	0.263612	1.24692	0.439321	1.10951	0.345853	0.648521	0.332498	0.430448	0.25219	0.343836	0.323591
cg16143049	3	124768294	HEG1	Body		7	0.4415	0.0719674	8.53096e-10	0.4415	0.0719674	8.53096e-10	0.626904	6	0.310693	0.218322	0.625322	0.167887	0.12204	0.299818	0.382066	0.190391	0.695829	0.217198	0.39184	0.132388	0.383398	0.22558
cg16322565	3	119526221	NR1I2;NR1I2;NR1I2	Body;Body;Body	N_Shelf	7	0.910866	0.139103	5.82589e-11	0.910866	0.139103	5.82589e-11	0.643439	6	0.827329	0.488414	0.50714	0.358019	1.66468	0.461844	1.01212	0.362545	1.03025	0.420083	0.861331	0.249811	0.79029	0.418871
cg16773803	20	42169558	L3MBTL;L3MBTL	3'UTR;Body		7	0.782125	0.126667	6.63009e-10	0.782125	0.126667	6.63009e-10	0.795109	6	1.15146	0.423786	1.07583	0.328633	0.790583	0.500502	0.764433	0.323684	0.504778	0.371563	0.585527	0.224938	0.96235	0.379168
cg16828491	4	8230829	SH3TC1	Body		7	0.605893	0.109643	3.27514e-08	0.605893	0.109643	3.27514e-08	0.651558	6	0.505817	0.334613	0.755272	0.299162	0.140695	0.367475	0.945813	0.308035	0.280033	0.338843	0.659033	0.18152	0.657361	0.405708
cg17710804	1	36771844	C1orf113;C1orf113	TSS1500;TSS200	Island	7	1.02527	0.153815	2.63583e-11	1.02527	0.153815	2.63583e-11	0.473141	6	1.12656	0.473585	1.65273	0.407438	1.00404	0.55404	1.08325	0.344832	0.979241	0.473007	0.535595	0.294561	1.31624	0.492521
cg17711521	6	225824				7	0.843806	0.1535	3.86105e-08	0.843806	0.1535	3.86105e-08	0.820467	6	1.52772	0.562161	1.02251	0.367656	0.966742	0.516033	0.629962	0.417204	0.615849	0.435003	0.647387	0.289238	1.00592	0.441093
cg18016128	17	16396497	C17orf76;C17orf76	TSS1500;TSS1500	S_Shore	7	0.569666	0.101891	2.25817e-08	0.569666	0.101891	2.25817e-08	0.910704	6	0.723385	0.310422	0.643559	0.25661	0.735742	0.406047	0.300004	0.2471	0.749249	0.304347	0.549537	0.188225	0.496637	0.328004
cg18120259	6	43894639	LOC100132354	Body		7	0.771507	0.143432	7.49411e-08	0.771507	0.143432	7.49411e-08	0.42396	6	0.474215	0.46715	0.812043	0.362105	0.586348	0.525977	0.313796	0.383502	0.441006	0.402709	0.988182	0.260566	1.4947	0.443237
cg18663307	21	46341389	ITGB2;ITGB2	5'UTR;TSS1500		7	0.903701	0.142319	2.15551e-10	0.903701	0.142319	2.15551e-10	0.801386	6	1.0979	0.435741	1.34536	0.392186	0.644061	0.521212	1.06355	0.388411	0.795193	0.467881	0.846895	0.245553	0.486757	0.403546
cg18901895	14	90168351			Island	7	0.785575	0.141337	2.72631e-08	0.785575	0.141337	2.72631e-08	0.778429	6	0.804654	0.450601	0.77783	0.328861	0.261021	0.533378	0.73282	0.388965	0.482431	0.350429	1.1192	0.272757	0.822518	0.489203
cg19020666	1	178452552			N_Shelf	7	1.0338	0.180587	1.03635e-08	1.0338	0.180587	1.03635e-08	0.96485	6	0.780858	0.546535	0.920797	0.485352	1.33927	0.523389	0.83327	0.481204	1.36327	0.522639	0.936666	0.344672	1.26162	0.575107
cg19309616	1	41851836			S_Shelf	7	0.895522	0.160473	2.39823e-08	0.895522	0.160473	2.39823e-08	0.817834	6	0.757728	0.5045	1.32999	0.373381	0.541797	0.624273	0.583549	0.364691	1.18555	0.465738	0.822224	0.311564	0.930741	0.60479
cg19498794	1	178445641	RASAL2;RASAL2	3'UTR;3'UTR		7	1.27364	0.228152	2.3718e-08	1.27364	0.228152	2.3718e-08	0.619264	6	1.48157	0.734791	1.75852	0.603508	0.331386	0.811485	2.00705	0.620242	0.761448	0.662729	1.03451	0.422972	1.3919	0.616751
cg19697725	17	8198295	SLC25A35	TSS200	N_Shore	7	0.446957	0.0778392	9.35348e-09	0.443451	0.0707147	3.58787e-10	0.316671	6	0.363203	0.227547	0.653134	0.163477	0.778924	0.279295	0.635124	0.18132	0.262784	0.195075	0.291134	0.135308	0.267644	0.228752
cg19805668	14	75418675	PGF	Body	N_Shelf	7	0.755758	0.132078	1.05254e-08	0.755758	0.132078	1.05254e-08	0.797872	6	1.08037	0.442439	0.789515	0.345892	0.82163	0.388225	0.366398	0.312287	0.534805	0.40196	0.856749	0.236967	1.15432	0.580183
cg20306694	12	51718251	BIN2	TSS1500		7	0.85178	0.150925	1.66413e-08	0.85178	0.150925	1.66413e-08	0.701567	6	1.00798	0.588787	1.27131	0.387759	1.29404	0.483528	0.892034	0.405006	0.465168	0.48171	0.749408	0.264838	0.436651	0.42933
cg20774552	11	46415316			S_Shore	7	0.538387	0.100352	8.09446e-08	0.538387	0.100352	8.09446e-08	0.437282	6	0.861745	0.328477	0.830943	0.244813	0.990907	0.399764	0.441373	0.239772	0.260675	0.274084	0.337508	0.201411	0.50654	0.291939
cg20813374	6	35657180	FKBP5;FKBP5;FKBP5;FKBP5	5'UTR;TSS1500;TSS1500;TSS1500	S_Shore	7	0.735963	0.137469	8.61952e-08	0.730869	0.129257	1.56406e-08	0.354293	6	1.35357	0.430535	0.984786	0.298257	0.946617	0.465886	0.716719	0.269751	0.191457	0.340628	0.462709	0.284935	0.969581	0.504314
cg21161526	9	123691672			Island	7	0.655081	0.118892	3.59025e-08	0.655081	0.118892	3.59025e-08	0.511667	6	0.853111	0.447765	0.939504	0.296594	1.4847	0.622291	0.669519	0.332013	0.189336	0.329676	0.644401	0.209228	0.471285	0.305827
cg21950166	1	27189349	SFN	TSS1500	N_Shore	7	0.835002	0.155422	7.76549e-08	0.837	0.145261	8.31114e-09	0.350918	6	1.48628	0.479872	1.04331	0.352451	1.32062	0.624354	0.498558	0.345176	0.354852	0.399296	1.00982	0.272902	0.33552	0.479959
cg22166739	11	73694868	UCP2	TSS1500	S_Shore	7	0.541598	0.096418	1.94091e-08	0.541372	0.0938451	7.98445e-09	0.396701	6	0.99903	0.318363	0.684445	0.196518	0.233744	0.514347	0.667526	0.326762	0.101919	0.252132	0.488077	0.176404	0.564426	0.24415
cg22203237	7	68983823				5	1.44554	0.189293	2.23168e-14	1.44554	0.189293	2.23168e-14	0.718365	4	1.39705	0.482201	1.49805	0.337024	2.07435	0.537541	1.33894	0.394736	1.09105	0.450614	NA	NA	NA	NA
cg22778014	4	109811985	COL25A1;COL25A1	Body;Body		7	0.625104	0.116109	7.29422e-08	0.621878	0.110106	1.6234e-08	0.363787	6	0.366692	0.316092	0.994213	0.254207	0.419502	0.492835	0.816891	0.273089	0.785287	0.312181	0.263335	0.217817	0.731375	0.350552
cg23290159	5	150474234				7	0.703364	0.114293	7.55233e-10	0.700956	0.108253	9.47041e-11	0.362211	6	1.26242	0.373438	1.05801	0.24342	0.811755	0.434055	0.49332	0.26013	0.562199	0.301723	0.523757	0.218292	0.448659	0.32915
cg23598089	1	203652079	ATP2B4;ATP2B4	5'UTR;5'UTR		7	1.08082	0.170663	2.40393e-10	1.05631	0.146509	5.60037e-13	0.257648	6	1.66258	0.461377	1.42265	0.378732	1.5252	0.545731	1.23377	0.39951	1.05833	0.430151	0.774523	0.262413	0.309935	0.431591
cg23598480	2	60102800				7	0.690113	0.122588	1.80717e-08	0.676712	0.114251	3.16118e-09	0.348215	6	1.07981	0.383549	0.744986	0.262286	1.30394	0.488183	0.44567	0.323773	1.0074	0.315373	0.35825	0.211544	0.636345	0.330787
cg23683497	1	203192517	CHIT1	Body		7	0.843371	0.132171	1.76034e-10	0.843371	0.132171	1.76034e-10	0.454887	6	0.943338	0.435533	1.32412	0.292664	1.20897	0.609461	0.941858	0.329461	0.518353	0.419204	0.504337	0.250423	0.728545	0.384744
cg23782083	8	37997055	ASH2L;ASH2L	3'UTR;3'UTR		7	1.14002	0.174756	6.86802e-11	1.14002	0.174756	6.86802e-11	0.559518	6	1.55202	0.531688	1.42034	0.431836	1.60519	0.529537	1.41993	0.487654	0.696124	0.493484	0.647808	0.352837	1.13492	0.50415
cg24468934	1	26880767	MIR1976;RPS6KA1;RPS6KA1	TSS1500;Body;Body		7	0.664073	0.123775	8.08698e-08	0.662178	0.12131	4.80042e-08	0.402369	6	0.474055	0.377128	0.753437	0.268409	1.6208	0.473877	1.09823	0.54167	0.530164	0.311023	0.582262	0.232968	0.387438	0.309835
cg25194322	1	166131844	FAM78B	Body	N_Shelf	7	0.688299	0.107368	1.44877e-10	0.688299	0.107368	1.44877e-10	0.56715	6	0.723598	0.316289	0.964208	0.249677	1.11777	0.469544	0.714645	0.279763	0.799585	0.315393	0.530827	0.206637	0.23543	0.31744
cg25213452	1	206630385	SRGAP2;SRGAP2	Body;Body		7	0.599314	0.107496	2.47199e-08	0.600981	0.105637	1.277e-08	0.405013	6	1.05377	0.346344	0.323389	0.2674	0.637935	0.391604	0.298028	0.265681	0.382624	0.312756	0.842199	0.191989	0.584408	0.32881
cg25216039	6	90299661	ANKRD6	Body		7	0.645407	0.106773	1.4971e-09	0.643936	0.103645	5.20109e-10	0.389356	6	0.532294	0.318706	0.976062	0.254497	1.07763	0.361509	0.837327	0.252025	0.390768	0.285483	0.430996	0.203485	0.375706	0.353792
cg25950100	17	73914099	FBF1	Body	Island	7	0.564422	0.104799	7.21372e-08	0.564422	0.104799	7.21372e-08	0.729708	6	0.252981	0.395359	0.65788	0.235634	0.251641	0.450939	0.39326	0.251916	0.972773	0.29799	0.575283	0.21784	0.543665	0.270829
cg26429381	2	217639206				7	0.724771	0.126059	8.95312e-09	0.724771	0.126059	8.95312e-09	0.600756	6	0.719335	0.396092	1.11961	0.280443	0.830585	0.500008	0.328997	0.348857	1.00379	0.37743	0.576481	0.253368	0.524739	0.332848

## Sheet: Supplementary Table 3
Supplementary Table 3: Significant differentially methylated positions (DMPs) associated with schizophrenia
Probe ID	CHR	MAPINFO	UCSC_RefGene		N_cohorts	Meta-analysis							UCL		Aberdeen		Twins		IoPPN		Dublin		Sweden
						Random effects model			Fixed effects model			Heterogeneity P value	Mean difference	SE	Mean difference	SE	Mean difference	SE	Mean difference	SE	Mean difference	SE	Mean difference	SE
			Name	Group		Mean difference	SE	P value	Mean difference	SE	P value
cg24004483	1	944783			6	1.12658	0.156681	6.46654e-13	1.12658	0.156681	6.46654e-13	0.760857	0.782844	0.403002	1.04808	0.260017	0.818408	0.601724	1.60828	0.456612	1.34163	0.336783	1.10383	0.541382
cg16989340	1	1084147			6	0.637764	0.095587	2.52204e-11	0.640484	0.092026	3.40706e-12	0.383671	0.772503	0.259013	0.791895	0.158703	0.45898	0.35651	0.869323	0.315549	0.566445	0.176054	0.154585	0.274237
cg16048006	1	2065263	PRKCZ;PRKCZ;PRKCZ	5'UTR;Body;5'UTR	6	0.710011	0.131739	7.06367e-08	0.713548	0.117385	1.21149e-09	0.301653	1.15946	0.30303	0.859128	0.206253	0.510345	0.382609	0.821791	0.350691	0.283984	0.255462	0.563002	0.355993
cg13966547	1	2406284	PLCH2	TSS1500	6	0.741169	0.131464	1.72248e-08	0.758781	0.118442	1.49063e-10	0.31809	0.372715	0.308023	1.10666	0.210771	0.284151	0.478151	0.900173	0.341102	0.68234	0.234874	0.546479	0.374314
cg21943117	1	2840308			6	0.85718	0.119872	8.62884e-13	0.85718	0.119872	8.62884e-13	0.545908	0.672897	0.343465	1.08355	0.209272	1.41344	0.494134	0.813883	0.371398	0.697983	0.232679	0.546442	0.343691
cg16120196	1	2922569			6	0.729107	0.103424	1.79317e-12	0.729107	0.103424	1.79317e-12	0.621071	0.74403	0.287605	0.986672	0.183376	0.737445	0.364616	0.626652	0.302516	0.552786	0.223585	0.482585	0.275159
cg15211996	1	2936768	ACTRT2	TSS1500	6	1.01489	0.125441	5.93583e-16	1.01948	0.118572	8.1114e-18	0.361891	0.582464	0.298758	1.24221	0.212406	1.25639	0.481393	1.31813	0.344279	0.999588	0.247424	0.643828	0.339581
cg11837181	1	3001002	PRDM16;PRDM16	Body;Body	6	0.685856	0.115403	2.796e-09	0.702471	0.105156	2.38454e-11	0.334534	0.599845	0.304947	0.939866	0.180116	0.495361	0.467442	0.639624	0.315047	0.762603	0.204854	0.11784	0.310453
cg03527274	1	3147443	PRDM16;PRDM16	Body;Body	6	0.774913	0.12763	1.26663e-09	0.777355	0.125552	5.95939e-10	0.40125	0.880841	0.349882	1.11097	0.222764	0.468443	0.511599	0.75919	0.430519	0.679707	0.249193	0.295914	0.319463
cg01196079	1	3201858	PRDM16;PRDM16	Body;Body	6	0.622804	0.11266	3.23606e-08	0.622804	0.11266	3.23606e-08	0.705643	0.27973	0.314161	0.686731	0.201735	0.900726	0.400779	0.959031	0.349428	0.508248	0.230348	0.584011	0.303989
cg00063748	1	3352986	PRDM16;PRDM16	3'UTR;3'UTR	6	0.813865	0.125292	8.26212e-11	0.82816	0.104048	1.7283e-15	0.259142	0.364395	0.292809	0.775213	0.174148	0.768884	0.476483	1.12315	0.319915	1.10747	0.195783	0.459612	0.365882
cg03916277	1	3380250	ARHGEF16	Body	5	0.536904	0.0898369	2.28087e-09	0.536904	0.0898369	2.28087e-09	0.579386	0.262418	0.240919	0.606495	0.137011	0.454581	0.368184	0.794279	0.249981	0.453993	0.182495	NA	NA
cg26788812	1	3438863	MEGF6	Body	6	0.583321	0.0933416	4.12245e-10	0.583321	0.0933416	4.12245e-10	0.598965	0.372498	0.260495	0.787838	0.155986	0.331035	0.332462	0.637565	0.315471	0.554689	0.187655	0.343261	0.295562
cg22383924	1	3590479	TP73	5'UTR	6	0.785374	0.119615	5.17297e-11	0.796356	0.109002	2.75406e-13	0.333135	0.357387	0.281409	1.11342	0.191722	0.581961	0.544479	0.837323	0.330079	0.664342	0.211669	0.81865	0.325106
cg10620434	1	5586357			6	0.410738	0.0734355	2.22945e-08	0.410738	0.0734355	2.22945e-08	0.750429	0.0781034	0.236233	0.443491	0.125219	0.619437	0.282863	0.449366	0.226032	0.400384	0.14469	0.452659	0.20455
cg16894819	1	6262620			6	0.711869	0.113385	3.42256e-10	0.711869	0.113385	3.42256e-10	0.723981	0.542207	0.283765	0.964778	0.204755	0.730525	0.386501	0.816926	0.36392	0.515991	0.242491	0.564466	0.31218
cg01799460	1	6529710	PLEKHG5;PLEKHG5;PLEKHG5;PLEKHG5;PLEKHG5	Body;Body;Body;Body;Body	5	0.457406	0.0799702	1.0671e-08	0.457406	0.0799702	1.0671e-08	0.501975	0.232563	0.220297	0.402086	0.126236	0.815682	0.25345	0.508388	0.264492	0.499083	0.15224	NA	NA
cg04215950	1	7125137	CAMTA1	Body	6	0.935055	0.173681	7.29441e-08	1.02374	0.111244	3.49195e-20	0.0550322	0.778074	0.303583	1.28347	0.19332	0.493383	0.434305	1.23917	0.344493	1.19056	0.215892	0.167072	0.353212
cg24455634	1	7527781	CAMTA1	Body	5	0.998766	0.145564	6.82025e-12	0.998766	0.145564	6.82025e-12	0.996065	0.972426	0.334214	1.05269	0.257607	0.834488	0.530925	1.07178	0.439645	0.973048	0.26305	NA	NA
cg17875988	1	7739886	CAMTA1	Body	6	0.662613	0.119566	2.99328e-08	0.683011	0.102511	2.68605e-11	0.277807	0.248076	0.287411	0.873876	0.175389	0.323037	0.438238	1.01427	0.29924	0.690512	0.200855	0.36864	0.326421
cg22595920	1	9716050	C1orf200;PIK3CD	TSS1500;5'UTR	6	0.797498	0.0993749	1.01407e-15	0.797498	0.0993749	1.01407e-15	0.440272	1.03009	0.266726	0.843723	0.167876	1.15313	0.363036	0.333003	0.298702	0.790285	0.201962	0.532948	0.34481
cg10801633	1	10579190	PEX14	Body	6	0.724601	0.134606	7.31993e-08	0.724601	0.134606	7.31993e-08	0.467969	0.674621	0.373337	0.766534	0.231778	1.49828	0.586778	0.334332	0.418585	0.940489	0.278131	0.313526	0.35661
cg26362368	1	10675623	PEX14	Body	6	0.480357	0.0867531	3.07597e-08	0.480357	0.0867531	3.07597e-08	0.921814	0.40268	0.239328	0.456413	0.134767	0.354852	0.388061	0.498053	0.272044	0.645384	0.180463	0.290912	0.324551
cg05352668	1	11023756	C1orf127;C1orf127	Body;Body	5	0.537321	0.092594	6.51457e-09	0.537321	0.092594	6.51457e-09	0.798233	0.455872	0.209802	0.67292	0.15584	0.614187	0.322126	0.338631	0.249899	0.489626	0.192124	NA	NA
cg02338965	1	11476001			6	0.741852	0.134401	3.3957e-08	0.752915	0.124733	1.57795e-09	0.34218	0.422479	0.295698	1.05459	0.227102	0.568539	0.365899	1.00471	0.366884	0.775017	0.265419	0.0921752	0.479216
cg05654304	1	12538678	VPS13D;VPS13D	Body;Body	6	-0.439247	0.070511	4.67989e-10	-0.439247	0.070511	4.67989e-10	0.779258	-0.363569	0.200023	-0.451161	0.110787	-0.973041	0.52256	-0.473307	0.196906	-0.510797	0.154379	-0.227891	0.207377
cg18229396	1	13845638			5	1.06427	0.14961	1.12996e-12	1.07588	0.131756	3.19547e-16	0.288455	0.883681	0.328936	1.47369	0.233637	0.856242	0.387402	1.14997	0.356319	0.77715	0.253971	NA	NA
cg22670675	1	15533433	TMEM51;TMEM51;TMEM51;TMEM51	5'UTR;5'UTR;5'UTR;5'UTR	6	1.13142	0.155755	3.75559e-13	1.13422	0.147509	1.48066e-14	0.36417	1.29861	0.410398	1.39835	0.261466	1.58255	0.446044	1.12816	0.486197	0.762142	0.299346	0.548558	0.44823
cg00107046	1	16465562	EPHA2	Body	6	0.421453	0.0707174	2.52733e-09	0.421453	0.0707174	2.52733e-09	0.428059	0.296555	0.19087	0.384345	0.122504	0.170771	0.295891	0.424362	0.189185	0.639363	0.134355	0.116708	0.299884
cg06911110	1	17293971	CROCC	Body	5	-1.22869	0.171169	7.06211e-13	-1.22869	0.171169	7.06211e-13	0.432345	-1.84307	0.39972	-1.07822	0.277601	-0.737524	0.756908	-1.4759	0.489099	-0.998061	0.33389	NA	NA
cg03513388	1	17599362	PADI3	Body	6	0.918632	0.161063	1.17344e-08	0.960742	0.116548	1.67452e-16	0.128316	1.26907	0.355285	1.28868	0.195888	0.688799	0.510095	0.893337	0.344572	0.81079	0.248797	0.340796	0.298592
cg23280305	1	17834982			6	0.800663	0.146596	4.71576e-08	0.814202	0.123573	4.43246e-11	0.276417	0.261299	0.315946	1.01262	0.19875	0.787795	0.491146	1.32062	0.377159	0.658851	0.249617	0.663443	0.584305
cg04562757	1	17882998	ARHGEF10L	5'UTR	6	0.966031	0.177386	5.15362e-08	1.02432	0.110155	1.41885e-20	0.0336361	0.845854	0.301507	1.46368	0.195894	0.812992	0.371984	1.35573	0.313355	0.738096	0.23915	0.419047	0.309243
cg13840174	1	18693462	IGSF21	Body	6	0.774798	0.144901	8.93823e-08	0.795406	0.130761	1.18011e-09	0.319956	1.02243	0.354558	1.1083	0.228349	0.487606	0.449246	0.53215	0.406497	0.740742	0.261537	0.116268	0.417885
cg16360668	1	19265059	IFFO2	Body	6	-0.50314	0.0887497	1.43462e-08	-0.50314	0.0887497	1.43462e-08	0.428285	-0.655362	0.289342	-0.668588	0.14704	-0.506944	0.262836	-0.666713	0.334925	-0.346561	0.194861	-0.142779	0.229194
cg12409547	1	22222815	HSPG2	Body	6	0.674983	0.0942535	7.98829e-13	0.674983	0.0942535	7.98829e-13	0.920531	0.561407	0.267382	0.824197	0.162233	0.699535	0.411367	0.653605	0.274597	0.564984	0.18356	0.617229	0.291938
cg26530485	1	23496304	LUZP1;LUZP1	TSS1500;TSS1500	6	-0.738419	0.133131	2.91331e-08	-0.786249	0.106253	1.36384e-13	0.214076	-0.63479	0.301532	-1.0926	0.171483	-0.601913	0.428313	-0.773425	0.317582	-0.682531	0.235026	-0.217838	0.31462
cg01768001	1	24831147	RCAN3	5'UTR	6	-0.480772	0.088168	4.95512e-08	-0.480772	0.088168	4.95512e-08	0.767942	-0.582839	0.202575	-0.57985	0.162054	-0.430429	0.355324	-0.552685	0.247198	-0.214181	0.197518	-0.468198	0.24787
cg02327719	1	26185386	C1orf135	Body	6	0.557649	0.101702	4.17844e-08	0.558485	0.10116	3.37441e-08	0.411595	0.569485	0.267841	0.763494	0.167088	0.730139	0.406442	0.299767	0.333237	0.507802	0.206057	0.0224878	0.327016
cg24468934	1	26880767	MIR1976;RPS6KA1;RPS6KA1	TSS1500;Body;Body	6	0.643741	0.114785	2.0438e-08	0.643741	0.114785	2.0438e-08	0.427398	0.498176	0.311628	0.741175	0.193062	1.48037	0.448724	0.509199	0.627074	0.531852	0.218025	0.391997	0.312726
cg10208610	1	27326422	TRNP1	3'UTR	6	0.689866	0.104505	4.07611e-11	0.689866	0.104505	4.07611e-11	0.839611	0.997625	0.325171	0.779658	0.170086	0.706191	0.456754	0.570467	0.372659	0.52539	0.208234	0.574536	0.283022
cg19252333	1	29583372	PTPRU;PTPRU;PTPRU	Body;Body;Body	5	0.677467	0.120898	2.09922e-08	0.673538	0.105082	1.4585e-10	0.287964	0.236413	0.273957	0.602146	0.171206	0.762104	0.35324	1.07094	0.291746	0.796882	0.206908	NA	NA
cg06174704	1	32821327			6	0.535312	0.0882246	1.29831e-09	0.535312	0.0882246	1.29831e-09	0.465338	0.242287	0.233154	0.499824	0.145022	0.424996	0.410787	0.740592	0.3002	0.777281	0.174262	0.335432	0.281945
cg22361106	1	33909498			6	0.807831	0.107567	5.9128e-14	0.807831	0.107567	5.9128e-14	0.850366	0.516163	0.296111	0.902176	0.191473	1.09738	0.358318	0.804242	0.304566	0.728231	0.225958	0.817804	0.32294
cg22855237	1	33933458			6	0.565606	0.100115	1.60883e-08	0.565606	0.100115	1.60883e-08	0.550622	0.48154	0.255813	0.603414	0.172459	0.366589	0.334369	1.02535	0.285884	0.564203	0.272709	0.330825	0.248146
cg17710804	1	36771844	C1orf113;C1orf113	TSS1500;TSS200	6	1.25551	0.156517	1.04421e-15	1.25551	0.156517	1.04421e-15	0.690643	1.15685	0.391332	1.63411	0.293063	0.839843	0.524632	1.24879	0.412681	0.981807	0.331575	1.32349	0.497118
cg08529481	1	36832173	STK40	5'UTR	6	-0.725469	0.118901	1.05127e-09	-0.725469	0.118901	1.05127e-09	0.902809	-0.550992	0.341652	-0.801223	0.204633	-0.673005	0.56078	-0.974114	0.340255	-0.734876	0.241725	-0.462891	0.326963
cg18761349	1	36949733	CSF3R;CSF3R;CSF3R;CSF3R	TSS1500;TSS1500;TSS1500;TSS1500	6	0.813256	0.126419	1.25089e-10	0.849255	0.101571	6.20895e-17	0.207445	0.542652	0.253773	1.16601	0.179279	0.544909	0.388432	0.865815	0.342968	0.919431	0.209552	0.460479	0.284123
cg00338479	1	38551357			6	0.682026	0.112991	1.57861e-09	0.684779	0.104037	4.63985e-11	0.345725	1.08517	0.296642	0.815566	0.174056	0.956696	0.448811	0.236798	0.360324	0.476819	0.207702	0.524878	0.286648
cg07570723	1	39875238	KIAA0754;KIAA0754;MACF1;MACF1	5'UTR;1stExon;Body;Body	5	-0.827688	0.140612	3.94918e-09	-0.827688	0.140612	3.94918e-09	0.4712	-0.620243	0.380689	-0.849479	0.220811	-0.153072	0.480608	-1.32387	0.485225	-0.950898	0.261797	NA	NA
cg19309616	1	41851836			6	1.09834	0.158327	4.00108e-12	1.09834	0.158327	4.00108e-12	0.707692	0.789996	0.416877	1.31293	0.268566	0.35679	0.591137	1.1928	0.432467	1.18808	0.326479	0.939642	0.610434
cg08139729	1	41984243	HIVEP3;HIVEP3	Body;Body	6	-0.642243	0.0952848	1.58114e-11	-0.641574	0.0945633	1.16412e-11	0.408936	-0.71978	0.228885	-0.540808	0.162323	-0.505717	0.341451	-1.25987	0.305782	-0.528075	0.217194	-0.591996	0.264279
cg09502149	1	43406792	SLC2A1	Body	6	0.808759	0.111743	4.56538e-13	0.808759	0.111743	4.56538e-13	0.477381	1.2791	0.268975	0.79052	0.203112	0.84871	0.430012	0.661187	0.305308	0.552318	0.233075	0.812592	0.365639
cg02283735	1	44011587	PTPRF;PTPRF	Body;Body	6	1.47838	0.239143	6.32998e-10	1.47838	0.239143	6.32998e-10	0.488079	1.0045	0.624211	2.11102	0.430682	0.603169	0.709269	1.28173	0.715357	1.55726	0.50803	1.25867	0.764384
cg14220329	1	45050807	RNF220	Body	6	0.521014	0.0945506	3.57972e-08	0.521014	0.0945506	3.57972e-08	0.419097	0.109401	0.257581	0.555741	0.155259	0.34938	0.500316	0.677566	0.312742	0.740558	0.184374	0.29729	0.292773
cg22438763	1	47900256	FOXD2;MGC12982	TSS1500;Body	6	-1.4157	0.256478	3.39467e-08	-1.44254	0.191266	4.62573e-14	0.141129	-0.625483	0.526036	-1.92386	0.338559	-1.63771	0.699047	-2.25898	0.572151	-1.04279	0.388315	-0.986437	0.553484
cg00983803	1	48575902	SKINTL	Body	6	0.653172	0.100529	8.17636e-11	0.653172	0.100529	8.17636e-11	0.425984	0.492664	0.24199	0.876967	0.179254	0.417076	0.416044	1.00334	0.306982	0.487043	0.21454	0.418412	0.281314
cg07584563	1	50879560			6	0.933261	0.143371	7.54485e-11	0.933261	0.143371	7.54485e-11	0.886805	0.886194	0.368921	1.1385	0.244226	1.03728	0.638056	0.8959	0.411754	0.81887	0.281902	0.463341	0.527174
cg26527263	1	53875972			5	0.785613	0.118526	3.39793e-11	0.785613	0.118526	3.39793e-11	0.914076	0.607831	0.293341	0.714922	0.197399	0.875289	0.44769	0.949252	0.325436	0.882584	0.226648	NA	NA
cg09007354	1	54100163	GLIS1	5'UTR	6	0.901147	0.131181	6.4428e-12	0.901522	0.116079	8.06959e-15	0.309088	0.93966	0.349453	0.760543	0.193851	1.35181	0.427479	0.418943	0.407329	1.2444	0.230853	0.622883	0.33055
cg09890699	1	54821853	SSBP3;SSBP3;SSBP3	Body;Body;Body	6	-0.967002	0.180541	8.50237e-08	-1.01557	0.103917	1.47169e-22	0.0193502	-0.668991	0.28632	-1.15932	0.178679	-0.287606	0.436024	-1.78505	0.322988	-1.10505	0.213539	-0.545559	0.285045
cg20946991	1	56213304			5	0.736068	0.131197	2.01861e-08	0.736068	0.131197	2.01861e-08	0.602392	0.748063	0.288013	1.0003	0.23758	0.355475	0.368977	0.778668	0.358615	0.557214	0.275199	NA	NA
cg10092779	1	57294085			6	0.787537	0.122155	1.14045e-10	0.787537	0.122155	1.14045e-10	0.564931	0.748613	0.325008	0.979858	0.21088	0.850811	0.489641	0.919634	0.353231	0.790447	0.276336	0.243948	0.319747
cg04362706	1	57570305	DAB1	Body	6	0.829763	0.11407	3.48595e-13	0.835273	0.108043	1.0677e-14	0.3662	0.791204	0.298174	1.05905	0.186605	0.390342	0.411455	1.20699	0.328005	0.629296	0.222851	0.583382	0.310652
cg04211018	1	62783533	KANK4	5'UTR	6	0.679506	0.0990159	6.76238e-12	0.679506	0.0990159	6.76238e-12	0.667711	0.665993	0.243448	0.757192	0.173735	1.1301	0.350232	0.705735	0.295727	0.530061	0.222466	0.409093	0.28628
cg23068989	1	64689428	UBE2U	Body	6	0.68849	0.104694	4.82616e-11	0.68849	0.104694	4.82616e-11	0.576278	0.671952	0.256973	0.815118	0.187355	1.32424	0.454848	0.72316	0.323016	0.498804	0.218136	0.46037	0.28667
cg25210796	1	65089808	CACHD1	Body	6	0.745597	0.118893	3.58383e-10	0.745269	0.117913	2.60746e-10	0.407886	1.12167	0.305327	0.741029	0.207085	0.995635	0.349682	0.954877	0.355437	0.386952	0.265335	0.408135	0.363189
cg22482700	1	68594186	GPR177;GPR177	Body;Body	6	0.67792	0.118151	9.59469e-09	0.67792	0.118151	9.59469e-09	0.489558	0.887484	0.304158	0.895642	0.20715	0.51251	0.390551	0.823131	0.358173	0.304911	0.250453	0.478708	0.371949
cg05269258	1	68922035			6	0.750208	0.125882	2.52834e-09	0.750208	0.125882	2.52834e-09	0.554487	0.670098	0.333888	1.06531	0.222343	0.614436	0.488766	0.834811	0.340891	0.543215	0.277118	0.364843	0.35147
cg13305246	1	84768702	SAMD13;SAMD13;SAMD13	5'UTR;5'UTR;Body	5	-0.553223	0.100594	3.80696e-08	-0.553223	0.100594	3.80696e-08	0.459261	-0.263869	0.25464	-0.681059	0.154568	-0.311142	0.430376	-0.305297	0.279987	-0.706339	0.20677	NA	NA
cg24662614	1	86040228	DDAH1	5'UTR	5	0.571553	0.103158	3.01483e-08	0.571553	0.103158	3.01483e-08	0.624785	0.598611	0.261724	0.512113	0.166635	0.0896355	0.3713	0.681689	0.267054	0.738961	0.212796	NA	NA
cg03058346	1	91275170			5	1.16466	0.153151	2.85719e-14	1.16466	0.153151	2.85719e-14	0.760536	0.962357	0.355398	1.39028	0.274466	1.44049	0.464125	1.10881	0.42752	0.955599	0.297098	NA	NA
cg01782024	1	91989267	CDC7;CDC7;CDC7	Body;Body;Body	5	0.696147	0.121695	1.06254e-08	0.696147	0.121695	1.06254e-08	0.430377	0.836439	0.293793	0.741468	0.192407	1.60517	0.593658	0.399486	0.396667	0.516576	0.225115	NA	NA
cg27514730	1	95027075			6	0.983577	0.167897	4.67883e-09	1.07449	0.110982	3.60626e-22	0.0738765	0.930908	0.279153	1.35858	0.188529	0.4829	0.393407	1.22868	0.349937	1.14785	0.221538	0.100805	0.437728
cg06180389	1	111436823	CD53;CD53	Body;Body	6	1.20865	0.182447	3.47947e-11	1.19846	0.137547	2.9564e-18	0.165557	2.10289	0.404277	1.26349	0.22758	1.41055	0.506189	0.750676	0.441371	0.897684	0.276318	0.938122	0.434498
cg20970369	1	111744108	DENND2D	TSS1500	6	0.762535	0.141687	7.37351e-08	0.762535	0.141687	7.37351e-08	0.586824	0.96312	0.396606	0.965661	0.247414	1.22445	0.545688	0.685407	0.512752	0.572116	0.281948	0.294094	0.368163
cg17898124	1	112528161	KCND3;KCND3	5'UTR;5'UTR	6	0.842625	0.142009	2.96346e-09	0.842625	0.142009	2.96346e-09	0.491877	0.85819	0.35142	1.09848	0.244018	0.992896	0.542179	0.652912	0.422488	0.796148	0.288166	-0.0648741	0.52349
cg04571584	1	113047945	WNT2B	Body	6	0.641334	0.119221	7.47434e-08	0.642954	0.106413	1.52166e-09	0.318578	1.25558	0.331847	0.705264	0.173791	0.694278	0.412037	0.463904	0.344781	0.552678	0.218815	0.227949	0.302448
cg15897102	1	115677211			6	0.955057	0.130413	2.41885e-13	0.955057	0.130413	2.41885e-13	0.512689	0.805515	0.354061	1.24172	0.218508	0.22603	0.534245	1.07232	0.422915	0.795891	0.276131	0.847452	0.361161
cg15743907	1	144994542	PDE4DIP;PDE4DIP;PDE4DIP;PDE4DIP	Body;Body;Body;Body	6	0.882767	0.153882	9.6578e-09	0.882767	0.153882	9.6578e-09	0.579019	0.631255	0.379244	0.964971	0.276737	0.475472	0.508072	1.65019	0.487873	0.860831	0.310355	0.685205	0.515547
cg02918910	1	151032962	MLLT11;CDC42SE1;MLLT11;CDC42SE1	5'UTR;TSS1500;1stExon;TSS1500	6	-0.379309	0.0698758	5.68841e-08	-0.379309	0.0698758	5.68841e-08	0.493415	-0.330543	0.153335	-0.464843	0.117505	-0.689389	0.227044	-0.314355	0.230973	-0.184925	0.144971	-0.459473	0.492364
cg13842305	1	151033007	MLLT11;CDC42SE1;MLLT11;CDC42SE1	5'UTR;TSS1500;1stExon;TSS1500	5	-0.934676	0.133352	2.39921e-12	-0.934676	0.133352	2.39921e-12	0.566337	-0.999792	0.325287	-0.848995	0.211177	-0.423475	0.433017	-1.35201	0.370876	-1.01958	0.291654	NA	NA
cg08903261	1	151434894			6	0.664919	0.101636	6.06347e-11	0.664919	0.101636	6.06347e-11	0.486122	0.626528	0.248701	0.850572	0.183821	0.301502	0.38941	1.00559	0.313481	0.552585	0.201458	0.335294	0.322166
cg08529744	1	151818922			5	0.932397	0.10351	2.10181e-19	0.936924	0.0922932	3.25977e-24	0.317155	1.03458	0.232802	1.09709	0.146999	0.733097	0.397399	1.05009	0.260754	0.633796	0.177809	NA	NA
cg08106792	1	153509323	S100A6	TSS1500	5	0.537845	0.0849785	2.46442e-10	0.537845	0.0849785	2.46442e-10	0.891913	0.550718	0.212968	0.643092	0.139612	0.423518	0.325311	0.412284	0.25565	0.471421	0.157376	NA	NA
cg12058501	1	154680385	KCNN3;KCNN3	3'UTR;3'UTR	6	0.527524	0.0985561	8.67359e-08	0.527524	0.0985561	8.67359e-08	0.7844	0.578501	0.272319	0.53054	0.172836	0.0717468	0.388634	0.893296	0.366354	0.539426	0.201119	0.481573	0.241145
cg22012156	1	155916405			6	0.569699	0.101941	2.29007e-08	0.569699	0.101941	2.29007e-08	0.444109	0.491591	0.247429	0.866103	0.178669	0.391325	0.394954	0.597234	0.292986	0.31691	0.22571	0.365227	0.303181
cg11525252	1	158041312	KIRREL	Body	6	0.604868	0.102788	3.98963e-09	0.604868	0.102788	3.98963e-09	0.431328	0.463963	0.267626	0.562611	0.174517	0.109829	0.337766	1.05653	0.413712	0.848832	0.222936	0.616021	0.276031
cg00173005	1	158258366	CD1C	TSS1500	6	0.740251	0.110448	2.05245e-11	0.740251	0.110448	2.05245e-11	0.87768	0.694447	0.225675	0.886183	0.187303	0.991194	0.443046	0.468595	0.545973	0.627218	0.237287	0.52783	0.362119
cg25076881	1	159409836	OR10J1	1stExon	6	0.962892	0.133355	5.17939e-13	0.965063	0.129779	1.03634e-13	0.391547	1.12891	0.337437	1.19687	0.225438	0.40527	0.487327	1.28969	0.381748	0.619033	0.263813	0.800903	0.427443
cg26417912	1	159921548	SLAMF9;SLAMF9;SLAMF9	3'UTR;Body;Body	6	0.526666	0.0950088	2.96754e-08	0.531076	0.089326	2.75839e-09	0.358972	0.574021	0.228178	0.598202	0.152146	-0.0395008	0.334529	0.848561	0.262188	0.538496	0.195876	0.274019	0.273442
cg13688312	1	162339673	NOS1AP;NOS1AP;NOS1AP	3'UTR;3'UTR;3'UTR	6	0.718345	0.133162	6.87026e-08	0.718345	0.133162	6.87026e-08	0.685688	0.647231	0.375358	0.82919	0.231069	0.983278	0.443197	1.06315	0.413219	0.570129	0.266837	0.205862	0.423468
cg01967416	1	162366541	SH2D1B	3'UTR	6	0.570545	0.101013	1.62088e-08	0.573356	0.0977043	4.40357e-09	0.381938	0.211262	0.247202	0.743325	0.176984	0.297118	0.310822	0.890693	0.282752	0.609416	0.219944	0.468499	0.278051
cg06183849	1	165190886	LMX1A	Body	6	0.683469	0.120997	1.61701e-08	0.683469	0.120997	1.61701e-08	0.815646	0.794889	0.343451	0.833506	0.200075	0.604084	0.449903	0.329733	0.359169	0.676006	0.231909	0.284743	0.529958
cg24428232	1	166124419	MIR921;FAM78B	TSS1500;Body	6	1.21902	0.126491	5.56917e-22	1.21902	0.126491	5.56917e-22	0.740769	0.958794	0.349887	1.31382	0.206555	1.27694	0.566362	1.48635	0.370687	1.23274	0.247432	0.631458	0.490058
cg25194322	1	166131844	FAM78B	Body	6	0.813004	0.105355	1.19313e-14	0.813004	0.105355	1.19313e-14	0.505029	0.743828	0.261356	0.952802	0.179589	0.978617	0.444621	0.993731	0.329895	0.801297	0.221089	0.240102	0.320403
cg21876925	1	173175328	TNFSF4	Body	5	-0.802994	0.128186	3.74593e-10	-0.802994	0.128186	3.74593e-10	0.560506	-0.533671	0.351432	-1.01715	0.199921	-0.341639	0.414636	-0.78183	0.361217	-0.779725	0.26481	NA	NA
cg19020666	1	178452552			6	1.06087	0.18098	4.57881e-09	1.06087	0.18098	4.57881e-09	0.895014	0.815814	0.451612	0.898623	0.349105	1.18416	0.495608	0.766249	0.583854	1.36611	0.366367	1.27008	0.580474
cg27176729	1	181056650	IER5	TSS1500	6	-1.31541	0.210939	4.49027e-10	-1.36174	0.172986	3.49115e-15	0.237434	-0.755537	0.48711	-1.55529	0.285273	-1.29352	0.691502	-1.48169	0.533717	-1.7995	0.361607	-0.420717	0.522285
cg05380885	1	183274661	NMNAT2;NMNAT2	Body;TSS1500	6	0.835822	0.139857	2.28308e-09	0.856744	0.115542	1.21615e-13	0.234618	0.710536	0.275535	1.05579	0.199993	1.26216	0.456629	0.761956	0.3676	0.973517	0.24973	0.131557	0.342948
cg11201256	1	184403226	C1orf21	5'UTR	6	0.587046	0.0943932	4.99845e-10	0.592661	0.0880398	1.67652e-11	0.356164	0.589158	0.227654	0.731445	0.147558	0.677213	0.406589	0.790956	0.26067	0.49715	0.180857	0.0453477	0.283365
cg12551813	1	200781121	CAMSAP1L1	Body	6	0.794636	0.132567	2.04443e-09	0.793911	0.119964	3.6432e-11	0.319885	1.27532	0.30036	0.65494	0.222838	0.418369	0.381769	0.341723	0.416175	0.815308	0.230152	1.12664	0.3849
cg27386431	1	200990482	KIF21B	Body	6	0.80629	0.144802	2.57334e-08	0.812442	0.132483	8.65542e-10	0.336083	0.718201	0.369822	1.07273	0.225775	1.33071	0.600318	1.08783	0.388955	0.515035	0.272671	0.302659	0.372417
cg00583535	1	201159906	IGFN1	TSS200	6	0.902186	0.158432	1.23744e-08	0.902186	0.158432	1.23744e-08	0.803382	1.01366	0.412701	0.884677	0.279884	0.633351	0.516839	0.692454	0.450612	1.21529	0.319098	0.361683	0.607062
cg24935896	1	201431492			6	0.858345	0.109105	3.62933e-15	0.858345	0.109105	3.62933e-15	0.548031	0.600244	0.307212	1.07614	0.178645	0.58607	0.378956	0.950984	0.346839	0.877567	0.236635	0.488453	0.334434
cg26841068	1	203456691	PRELP;PRELP	3'UTR;3'UTR	6	0.651853	0.105755	7.10213e-10	0.651853	0.105755	7.10213e-10	0.729463	0.870498	0.259519	0.624352	0.195649	0.984805	0.350303	0.449342	0.292432	0.614063	0.211213	0.324081	0.402219
cg23598089	1	203652079	ATP2B4;ATP2B4	5'UTR;5'UTR	6	1.14608	0.188202	1.13157e-09	1.17055	0.149401	4.69054e-15	0.1903	1.69209	0.381244	1.40534	0.272415	1.36347	0.516764	0.772596	0.474941	1.06066	0.301533	0.316287	0.435619
cg16530596	1	205227613	TMCC2	Body	6	0.503758	0.0902587	2.38761e-08	0.503758	0.0902587	2.38761e-08	0.718756	0.481568	0.232206	0.62513	0.147276	0.0585322	0.345514	0.392188	0.397689	0.427541	0.176011	0.657602	0.299852
cg02290880	1	206317854	CTSE;CTSE	Body;Body	6	0.717752	0.119106	1.67898e-09	0.717752	0.119106	1.67898e-09	0.609651	0.2097	0.359205	0.925942	0.207793	0.886216	0.362529	0.525732	0.392532	0.723424	0.238703	0.589237	0.355078
cg13052638	1	206677719			6	1.22989	0.228178	7.04381e-08	1.22989	0.228178	7.04381e-08	0.868234	1.47336	0.551828	1.0323	0.433926	1.059	0.735319	1.80935	0.656007	0.937052	0.459376	1.587	0.766973
cg00961792	1	207120407	PIGR	TSS1500	6	0.633661	0.100274	2.62705e-10	0.647645	0.0892908	4.07025e-13	0.30439	0.268881	0.259381	0.88527	0.159921	0.639736	0.322109	0.748451	0.263671	0.641921	0.176608	0.332136	0.255008
cg20738274	1	207201020	C1orf116;C1orf116	5'UTR;5'UTR	6	0.634801	0.113123	2.00439e-08	0.634801	0.113123	2.00439e-08	0.701672	0.276975	0.332759	0.682991	0.197284	0.518049	0.513572	0.893355	0.339955	0.776075	0.219571	0.367925	0.312579
cg00146437	1	209529869			6	0.668078	0.121903	4.24401e-08	0.668078	0.121903	4.24401e-08	0.703405	0.483036	0.304678	0.912821	0.212247	0.682658	0.438738	0.781905	0.365677	0.552526	0.266233	0.305192	0.364174
cg00916659	1	212558854	TMEM206	Body	6	0.937029	0.16518	1.40505e-08	0.937029	0.16518	1.40505e-08	0.58461	1.37874	0.47691	0.773608	0.276605	1.85245	0.651895	1.03289	0.518976	0.703164	0.31651	0.94286	0.564696
cg14731422	1	213561757			6	0.983432	0.182687	7.31926e-08	0.997707	0.163328	1.00504e-09	0.311143	1.4153	0.405489	1.2536	0.280766	1.40531	0.559606	0.441021	0.447451	0.669039	0.352813	0.330412	0.632742
cg18180339	1	220448523			6	0.491956	0.0919284	8.72252e-08	0.492021	0.0915894	7.78524e-08	0.412611	0.750685	0.23855	0.579564	0.157393	0.3432	0.402392	0.751893	0.282184	0.253037	0.197101	0.237643	0.244017
cg12762413	1	228873420	RHOU	Body	6	0.799819	0.145323	3.71823e-08	0.838818	0.116389	5.72011e-13	0.215104	0.648136	0.327303	1.21559	0.194833	0.949619	0.530905	0.784283	0.340631	0.619248	0.24127	0.35035	0.337171
cg18967021	1	229197824			6	0.727932	0.127245	1.06094e-08	0.743473	0.112745	4.27241e-11	0.302465	0.553523	0.308664	0.993574	0.194077	0.271716	0.466536	1.14554	0.342609	0.626508	0.237931	0.38963	0.303638
cg00355656	1	229692519	ABCB10	Body	6	1.17228	0.216866	6.46113e-08	1.19123	0.192445	6.01794e-10	0.299749	1.42963	0.494368	1.67776	0.344398	0.513766	0.585697	1.62464	0.621529	0.753173	0.390128	0.631337	0.644861
cg23735745	1	230248121	GALNT2	Body	6	-0.745682	0.13618	4.35725e-08	-0.750389	0.133063	1.70698e-08	0.394765	-0.338176	0.371246	-1.09142	0.23197	-0.158627	0.538061	-0.950982	0.412439	-0.671963	0.279249	-0.576351	0.343351
cg05656812	1	232021560	DISC1;DISC1;DISC1;DISC1;DISC1;TSNAX-DISC1;DISC1;DISC1;DISC1;DISC1	Body;Body;Body;Body;Body;Body;Body;Body;Body;Body	6	0.570604	0.0986506	7.29083e-09	0.570604	0.0986506	7.29083e-09	0.635219	0.352968	0.244573	0.754596	0.176794	0.845698	0.362313	0.566279	0.320554	0.540374	0.208556	0.307377	0.270153
cg06187080	1	232573578	SIPA1L2	Body	6	0.612254	0.108439	1.64178e-08	0.632039	0.0928357	9.88639e-12	0.269009	0.431487	0.262224	0.713311	0.157495	0.338318	0.349613	0.211697	0.286341	0.959543	0.201528	0.576755	0.248667
cg08038291	1	234915028			6	0.524788	0.0822495	1.76581e-10	0.524788	0.0822495	1.76581e-10	0.79484	0.658717	0.21094	0.620849	0.146842	0.572015	0.303532	0.402356	0.251301	0.482358	0.167998	0.255595	0.243622
cg17819085	1	235122803			6	0.848783	0.145069	4.88985e-09	0.876094	0.10719	3.00117e-16	0.14175	0.730191	0.27909	1.17922	0.181061	0.625025	0.410892	1.25724	0.324163	0.478581	0.225528	0.678468	0.341148
cg23014549	1	245727587	KIF26B	Body	6	0.855043	0.141058	1.34743e-09	0.855043	0.141058	1.34743e-09	0.562472	1.01254	0.38556	1.18449	0.250218	0.45085	0.414584	0.876547	0.413495	0.60165	0.295349	0.586156	0.475203
cg15358723	1	245750662	KIF26B	Body	6	0.907476	0.16772	6.27971e-08	0.918158	0.129783	1.49903e-12	0.171009	0.699235	0.372221	1.04804	0.227328	0.526451	0.469771	1.76577	0.39579	0.862842	0.27183	0.46081	0.345996
cg00532502	1	246953273	LOC149134	Body	6	0.615759	0.109916	2.11792e-08	0.619433	0.106341	5.71188e-09	0.384732	0.383981	0.278308	0.80938	0.187332	0.163157	0.370505	1.02744	0.357748	0.65096	0.224247	0.381567	0.288197
cg03773413	1	247335974	ZNF124	TSS1500	6	-1.08252	0.195407	3.02764e-08	-1.08252	0.195407	3.02764e-08	0.835605	-1.47646	0.540561	-1.22489	0.331343	-1.4682	0.80534	-0.775482	0.573609	-0.941175	0.394589	-0.555679	0.613751
cg00682069	2	1667458	PXDN	Body	6	0.590522	0.108659	5.49109e-08	0.590522	0.108659	5.49109e-08	0.881492	0.649288	0.354516	0.594118	0.187903	0.498165	0.34137	0.73116	0.333015	0.726311	0.228909	0.280638	0.291917
cg26381919	2	1695357	PXDN	Body	6	0.48047	0.0839151	1.03023e-08	0.48047	0.0839151	1.03023e-08	0.510552	0.340523	0.212125	0.583257	0.150434	0.251496	0.277701	0.477101	0.259042	0.704704	0.186458	0.224096	0.229627
cg18148375	2	1926535	MYT1L	Body	6	0.668586	0.0977937	8.10359e-12	0.668586	0.0977937	8.10359e-12	0.677811	0.414063	0.275871	0.849261	0.165001	0.692179	0.346573	0.811241	0.295675	0.554452	0.196441	0.428714	0.333062
cg26123647	2	2195399	MYT1L	5'UTR	6	0.935886	0.153635	1.11783e-09	0.936993	0.150771	5.14257e-10	0.400503	1.07269	0.403361	1.20899	0.250167	1.35072	0.537156	0.751209	0.473829	0.400579	0.305404	0.925999	0.55683
cg21484315	2	2712669			6	0.84011	0.15682	8.4537e-08	0.880503	0.120392	2.59993e-13	0.16663	0.794771	0.367592	1.27599	0.208492	0.379642	0.402658	1.14921	0.380306	0.635834	0.248734	0.529652	0.327168
cg20302414	2	3627214	RPS7	Body	6	1.43536	0.196773	2.99799e-13	1.43536	0.196773	2.99799e-13	0.825574	1.0444	0.496465	1.72421	0.399788	1.16134	0.555484	1.46597	0.78806	1.62524	0.342314	0.964176	0.685529
cg06943845	2	6507982			6	0.580254	0.107031	5.91511e-08	0.580254	0.107031	5.91511e-08	0.439185	0.474982	0.301245	0.741217	0.179746	0.418556	0.407236	0.911896	0.331006	0.526772	0.213898	0.0139405	0.346938
cg00085123	2	8723906			6	-0.74563	0.130819	1.20013e-08	-0.74563	0.130819	1.20013e-08	0.781297	-0.707579	0.3866	-0.668767	0.22069	-0.543034	0.415378	-1.11571	0.408378	-0.962506	0.276487	-0.422258	0.397248
cg19000647	2	11885321	LPIN1	TSS1500	5	-0.788475	0.141047	2.26878e-08	-0.798201	0.134389	2.85883e-09	0.373274	-0.417783	0.34226	-1.05472	0.204368	-0.208925	0.541209	-0.940291	0.464731	-0.694456	0.25953	NA	NA
cg25737891	2	12061277			6	1.05233	0.145974	5.6346e-13	1.05233	0.145974	5.6346e-13	0.854892	1.15053	0.365877	1.20294	0.270568	1.42999	0.503693	0.877498	0.474036	0.77285	0.304525	0.978726	0.388516
cg14756878	2	12568736			6	0.667118	0.107575	5.59491e-10	0.667118	0.107575	5.59491e-10	0.517517	0.74465	0.27922	0.80399	0.191665	0.788121	0.488731	1.03412	0.32742	0.380736	0.20745	0.459517	0.322519
cg11042505	2	15950244			5	0.57009	0.100437	1.37801e-08	0.57009	0.100437	1.37801e-08	0.6463	0.24905	0.251768	0.681254	0.159395	0.380923	0.380764	0.581645	0.316402	0.639388	0.19206	NA	NA
cg16533767	2	23736552	KLHL29	5'UTR	6	0.962387	0.177274	5.67299e-08	0.962387	0.177274	5.67299e-08	0.54594	1.10453	0.466402	1.43808	0.337536	0.533307	0.495987	0.967379	0.517371	0.77437	0.361378	0.405719	0.57849
cg15748555	2	23782147	KLHL29	5'UTR	5	0.525748	0.0891938	3.75949e-09	0.525748	0.0891938	3.75949e-09	0.722916	0.347898	0.249026	0.637875	0.139745	0.610901	0.2886	0.599786	0.267202	0.373277	0.175806	NA	NA
cg16058765	2	23913466	KLHL29	Body	6	0.555111	0.0947053	4.5882e-09	0.548992	0.0829663	3.66442e-11	0.294209	0.459842	0.215635	0.434486	0.138128	0.856205	0.333661	0.454576	0.263493	0.904689	0.187172	0.361952	0.226871
cg17644208	2	25142391	ADCY3	TSS1500	6	0.499571	0.0863229	7.15523e-09	0.497123	0.0801295	5.50466e-10	0.359596	0.804155	0.240593	0.534173	0.127774	0.937296	0.334444	0.406312	0.318143	0.330347	0.156365	0.280508	0.239054
cg03314052	2	25509286	DNMT3A;DNMT3A;DNMT3A	Body;Body;Body	6	0.617662	0.0959627	1.22274e-10	0.617662	0.0959627	1.22274e-10	0.655322	0.406725	0.258043	0.544085	0.16362	0.574407	0.414157	0.806646	0.28837	0.845453	0.190074	0.392181	0.305924
cg17535278	2	26523139			6	-0.353424	0.0624399	1.51176e-08	-0.353424	0.0624399	1.51176e-08	0.791263	-0.296964	0.180337	-0.33376	0.0978678	-0.327601	0.216476	-0.537458	0.16586	-0.260611	0.138084	-0.578169	0.298765
cg05102552	2	27650867	NRBP1	TSS1500	6	-0.859802	0.154105	2.41463e-08	-0.859802	0.154105	2.41463e-08	0.690214	-0.264583	0.404414	-1.05777	0.272285	-0.823807	0.602869	-0.996056	0.480964	-0.810423	0.297953	-1.10828	0.489879
cg11953516	2	27719501	FNDC4;GCKR	TSS1500;TSS1500	6	0.864674	0.154982	2.41651e-08	0.864674	0.154982	2.41651e-08	0.955463	1.09139	0.382941	0.846319	0.269536	0.663248	0.660145	0.876524	0.421451	0.69466	0.306881	1.22678	0.631714
cg09530108	2	36586710	CRIM1	Body	6	0.879954	0.105748	8.70726e-17	0.879954	0.105748	8.70726e-17	0.496895	0.966836	0.234808	1.07045	0.201683	0.74708	0.390778	1.11397	0.323208	0.738581	0.21742	0.387878	0.325709
cg20348189	2	36595352	CRIM1	Body	6	0.704996	0.119234	3.3652e-09	0.704996	0.119234	3.3652e-09	0.677953	0.800256	0.3423	0.648091	0.210185	0.741424	0.435602	1.23045	0.349331	0.59006	0.239703	0.461339	0.347101
cg00259518	2	43397515			6	-0.57455	0.103796	3.10566e-08	-0.57455	0.103796	3.10566e-08	0.916062	-0.5974	0.28354	-0.728504	0.187818	-0.597411	0.404874	-0.556635	0.300892	-0.50027	0.215455	-0.350494	0.273746
cg01205087	2	47008202			6	0.746737	0.118986	3.47806e-10	0.746737	0.118986	3.47806e-10	0.664066	0.605301	0.346379	0.739674	0.203844	0.756137	0.406626	1.20283	0.386715	0.836337	0.235392	0.293698	0.366385
cg18984200	2	48787750			6	0.557382	0.100522	2.94195e-08	0.557382	0.100522	2.94195e-08	0.946066	0.453888	0.259169	0.559455	0.15912	0.330767	0.624391	0.32825	0.349424	0.662922	0.194634	0.709633	0.366934
cg22363368	2	59126860			6	0.95749	0.167534	1.09582e-08	0.9884	0.128511	1.45784e-14	0.165302	1.00395	0.320558	1.41739	0.22885	0.469012	0.528966	1.18176	0.391673	0.539183	0.265612	0.803464	0.366169
cg23598480	2	60102800			6	0.823927	0.113228	3.42056e-13	0.823933	0.112882	2.89724e-13	0.413445	1.10434	0.316934	0.733003	0.188658	1.15926	0.462271	0.197621	0.397904	1.00911	0.221074	0.641213	0.333874
cg05339976	2	64964564			6	0.810437	0.142618	1.32693e-08	0.833739	0.119131	2.58738e-12	0.247791	0.535802	0.318033	1.2142	0.203791	0.696205	0.424868	0.835113	0.384729	0.476724	0.24379	0.907547	0.368248
cg19853143	2	65585470	SPRED2;SPRED2	Body;Body	6	-1.17393	0.211601	2.89174e-08	-1.17393	0.211601	2.89174e-08	0.719088	-1.4013	0.538201	-1.27135	0.336487	-2.21192	0.961275	-0.339993	0.769476	-1.01718	0.430127	-0.90015	0.730626
cg13358873	2	69271042	ANTXR1;ANTXR1;ANTXR1	Body;Body;Body	6	0.967308	0.138567	2.93474e-12	0.967308	0.138567	2.93474e-12	0.99778	0.965999	0.354822	0.995789	0.239543	1.17545	0.685031	1.09951	0.535696	0.928767	0.263959	0.843177	0.385102
cg09868768	2	70188605	ASPRV1	1stExon	6	1.01814	0.157667	1.06412e-10	0.997485	0.143569	3.71078e-12	0.331557	1.03597	0.402615	0.551395	0.243557	1.11782	0.580646	1.41464	0.468608	1.34531	0.296955	1.16066	0.388409
cg01894508	2	70189111	ASPRV1;ASPRV1	5'UTR;1stExon	6	0.825725	0.14899	2.98814e-08	0.825725	0.14899	2.98814e-08	0.902215	1.17487	0.3921	0.75852	0.271717	0.600385	0.545476	1.09073	0.454754	0.736	0.300725	0.670365	0.417181
cg13656408	2	73161954	EMX1	3'UTR	5	0.855167	0.150532	1.33932e-08	0.858589	0.141829	1.4157e-09	0.35208	0.737391	0.328346	1.1452	0.248128	0.552419	0.45627	1.21804	0.382952	0.499772	0.282023	NA	NA
cg08973382	2	74728623	LOC151534;LBX2	TSS1500;Body	6	0.71501	0.110284	8.96975e-11	0.71501	0.110284	8.96975e-11	0.491032	0.547565	0.317223	0.996467	0.191801	0.89735	0.453114	0.626997	0.334632	0.614488	0.217882	0.326932	0.312593
cg00052964	2	85135823			6	-0.582406	0.108763	8.56351e-08	-0.582406	0.108763	8.56351e-08	0.881116	-0.612916	0.271948	-0.679136	0.186507	-0.466131	0.423393	-0.284247	0.31517	-0.718707	0.256668	-0.441508	0.295645
cg22112075	2	85658146			6	1.03458	0.185491	2.43996e-08	1.03458	0.185491	2.43996e-08	0.825455	1.35536	0.435922	1.12346	0.354316	1.00583	0.603258	1.29479	0.526185	0.607157	0.375579	0.939545	0.647249
cg15009198	2	97429502	CNNM4	Body	5	-0.913773	0.166277	3.89623e-08	-0.913773	0.166277	3.89623e-08	0.837343	-0.905088	0.483718	-1.10755	0.249737	-0.931188	0.598584	-0.781662	0.446951	-0.60909	0.352134	NA	NA
cg02787615	2	99434688	C2orf55	Body	6	0.711272	0.116656	1.07961e-09	0.71653	0.111271	1.19889e-10	0.372495	0.831886	0.283981	0.832403	0.194958	0.924731	0.343915	0.441736	0.313512	0.750539	0.229974	-0.187499	0.470339
cg17654419	2	102012904			5	0.756345	0.125813	1.83628e-09	0.782961	0.10229	1.94323e-14	0.236644	0.696261	0.232386	1.05103	0.164087	0.377398	0.391213	0.826792	0.312771	0.517437	0.2078	NA	NA
cg12910851	2	102615524	IL1R2;IL1R2;IL1R2	1stExon;5'UTR;5'UTR	6	0.809989	0.134189	1.57801e-09	0.812683	0.127157	1.64616e-10	0.364146	0.709629	0.325276	0.954487	0.222412	0.998995	0.499163	1.30638	0.350893	0.618493	0.284279	0.259025	0.361055
cg20060108	2	102954350	IL1RL1;IL1RL1	5'UTR;5'UTR	6	1.81046	0.281517	1.26693e-10	1.81565	0.269367	1.57918e-11	0.370634	1.26306	0.628237	2.43567	0.51283	1.63133	0.863245	2.84103	0.78796	1.41774	0.564212	0.993446	0.860022
cg22478317	2	110271930			6	0.745485	0.133782	2.51291e-08	0.745485	0.133782	2.51291e-08	0.571205	0.52208	0.385605	1.00713	0.23077	1.32	0.587361	0.758412	0.393701	0.510205	0.264289	0.478309	0.386239
cg20710902	2	111440239			6	1.00055	0.129404	1.05895e-14	1.01582	0.111505	8.22872e-20	0.274712	1.08935	0.275473	1.27214	0.193733	0.588641	0.470869	1.33679	0.336501	0.705015	0.237512	0.680757	0.323771
cg19706534	2	120197644	SCTR	3'UTR	6	0.794388	0.134867	3.85867e-09	0.800571	0.120775	3.38847e-11	0.310688	0.603585	0.31814	0.803421	0.209638	0.38299	0.429411	1.28891	0.407872	1.129	0.256303	0.391604	0.328532
cg24605325	2	128168798			6	0.74053	0.13821	8.41437e-08	0.74053	0.13821	8.41437e-08	0.709628	0.696561	0.332594	0.9046	0.248167	1.24473	0.606624	0.362691	0.45606	0.801082	0.276363	0.335741	0.3936
cg19051213	2	128281334	IWS1	Body	6	1.23994	0.22688	4.62482e-08	1.2603	0.139798	1.96589e-19	0.0372153	1.5039	0.348497	1.56484	0.244544	1.37065	0.574462	1.86306	0.408042	0.722518	0.287517	0.364946	0.443734
cg15112747	2	129120791			6	0.764653	0.124995	9.50784e-10	0.782881	0.111551	2.24814e-12	0.310993	0.544582	0.332995	1.07006	0.190062	0.529007	0.416996	1.03988	0.340226	0.676932	0.230064	0.343596	0.310402
cg14947846	2	129227604			6	0.801682	0.13906	8.16509e-09	0.83142	0.113792	2.74215e-13	0.226056	0.751558	0.299502	1.0377	0.185998	0.133718	0.369123	0.926012	0.348389	1.12231	0.316594	0.518722	0.293366
cg17588294	2	129548156			6	0.850299	0.142618	2.49031e-09	0.874517	0.112887	9.42133e-15	0.195071	0.703337	0.331363	0.988644	0.190727	0.513109	0.426305	1.1884	0.332358	1.14189	0.249938	0.281156	0.297342
cg21214743	2	130481001			5	0.765302	0.121548	3.04849e-10	0.765302	0.121548	3.04849e-10	0.672176	0.897314	0.308383	0.880047	0.190343	1.06947	0.492873	0.451752	0.340869	0.58078	0.243629	NA	NA
cg09446806	2	134477298			6	0.811156	0.140552	7.86937e-09	0.812872	0.137784	3.64326e-09	0.398904	1.30502	0.348258	1.01222	0.237538	0.693873	0.481497	0.34649	0.45664	0.529713	0.271706	0.564763	0.496768
cg15818005	2	138845177			6	0.725111	0.12718	1.18803e-08	0.725111	0.12718	1.18803e-08	0.811235	0.618949	0.315134	0.931143	0.212414	0.236501	0.468637	0.589428	0.401306	0.706373	0.285177	0.694553	0.391249
cg19867914	2	144234430	ARHGAP15	Body	6	0.786375	0.129934	1.42977e-09	0.786375	0.129934	1.42977e-09	0.589525	0.913511	0.353311	1.06334	0.215954	0.665483	0.456124	0.549755	0.446641	0.61156	0.281162	0.378811	0.3699
cg18587465	2	152784175	CACNB4;CACNB4;CACNB4;CACNB4	Body;Body;Body;Body	6	0.648148	0.116407	2.57781e-08	0.648148	0.116407	2.57781e-08	0.583999	0.719316	0.319964	0.883149	0.206587	0.078268	0.427272	0.755416	0.372673	0.487069	0.236806	0.551012	0.314849
cg22033586	2	157292113	GPD2;GPD2;GPD2	1stExon;TSS1500;5'UTR	5	-1.42572	0.265085	7.51796e-08	-1.51791	0.17273	1.52576e-18	0.0798492	-0.824517	0.485441	-1.85154	0.273057	-0.492192	0.555861	-2.10412	0.501115	-1.45463	0.340151	NA	NA
cg08347373	2	160653686	CD302	Body	6	-0.918836	0.145639	2.80872e-10	-0.918836	0.145639	2.80872e-10	0.829285	-0.459006	0.413403	-0.971779	0.248149	-1.25251	0.471696	-0.761487	0.445067	-1.07058	0.325402	-0.868147	0.40595
cg04735129	2	160654086	CD302	Body	6	-0.607495	0.09949	1.02104e-09	-0.607734	0.0992851	9.29357e-10	0.414304	-0.135416	0.295245	-0.718281	0.156431	-0.424785	0.328643	-0.956861	0.350769	-0.708483	0.222598	-0.410498	0.294371
cg02244386	2	165473994	GRB14	Body	6	0.777467	0.128696	1.53036e-09	0.777467	0.128696	1.53036e-09	0.752084	1.105	0.335821	0.804371	0.222081	1.15751	0.523161	0.572271	0.413813	0.529445	0.258485	0.78811	0.384217
cg19848140	2	168822706	STK39	Body	6	1.0202	0.186022	4.15165e-08	1.04713	0.11629	2.16848e-19	0.0375814	0.586728	0.25937	1.45461	0.211928	1.55448	0.43239	1.20552	0.334835	0.947857	0.256264	0.385427	0.369607
cg23238677	2	170157334	LRP2	Body	6	0.873529	0.161986	6.9442e-08	0.873147	0.148228	3.84896e-09	0.329628	1.28729	0.367402	1.04117	0.263008	1.14994	0.581136	1.13664	0.471976	0.353049	0.322741	0.493281	0.389312
cg14107328	2	173983943	ZAK;ZAK	Body;Body	6	0.511886	0.0890132	8.88879e-09	0.511886	0.0890132	8.88879e-09	0.497547	0.486809	0.250967	0.494856	0.148078	0.263865	0.35938	0.878024	0.300918	0.631707	0.173471	0.123989	0.280501
cg01420564	2	179076804	OSBPL6	5'UTR	6	0.868128	0.125807	5.18368e-12	0.868782	0.1242	2.65175e-12	0.404156	1.01624	0.329995	1.09919	0.215007	1.05856	0.429342	0.778625	0.424463	0.374003	0.264347	0.893199	0.338509
cg02625481	2	183667124			5	0.810862	0.138142	4.36444e-09	0.817787	0.132864	7.50465e-10	0.373283	0.584929	0.29611	1.1715	0.222611	0.428895	0.438652	0.736824	0.409818	0.675557	0.2681	NA	NA
cg02489219	2	197676272	C2orf66	TSS1500	6	0.765132	0.129744	3.69664e-09	0.783373	0.103196	3.17086e-14	0.204332	0.606452	0.24866	1.03292	0.183642	0.529034	0.463041	1.22868	0.322619	0.66402	0.203849	0.294916	0.320405
cg00900242	2	200929967			6	0.691852	0.110181	3.40227e-10	0.691852	0.110181	3.40227e-10	0.706525	0.529667	0.263089	0.949318	0.201968	0.578539	0.405111	0.419895	0.306753	0.706341	0.218327	0.570692	0.418439
cg03035167	2	201336269	SPATS2L;SPATS2L;SPATS2L;SPATS2L	Body;Body;Body;Body	6	0.91832	0.154621	2.86464e-09	0.977942	0.112352	3.19605e-18	0.126002	1.23437	0.290738	1.28726	0.195638	0.30442	0.424811	0.836544	0.335832	0.885313	0.228309	0.410554	0.361064
cg00889363	2	206255841	PARD3B;PARD3B;PARD3B	Body;Body;Body	6	0.677377	0.126135	7.86167e-08	0.677377	0.126135	7.86167e-08	0.847548	0.766959	0.358656	0.663623	0.20751	1.24402	0.482347	0.689273	0.447553	0.606614	0.245757	0.394425	0.407947
cg25320169	2	206641630	NRP2;NRP2;NRP2;NRP2;NRP2	3'UTR;Body;3'UTR;Body;Body	6	0.884115	0.103068	9.65353e-18	0.891405	0.0939222	2.29086e-21	0.333292	1.07952	0.256942	1.11874	0.160936	0.791096	0.421984	0.576484	0.296631	0.62454	0.187976	0.896156	0.264231
cg13797580	2	215494121			6	0.503646	0.0919594	4.33013e-08	0.503646	0.0919594	4.33013e-08	0.464328	0.518751	0.240138	0.60693	0.158683	0.748896	0.362284	0.71367	0.289323	0.426727	0.19222	0.0464869	0.262006
cg22954687	2	216947743	TMEM169;TMEM169;TMEM169;PECR;TMEM169	5'UTR;5'UTR;5'UTR;TSS1500;5'UTR	6	-0.595325	0.102602	6.54131e-09	-0.596907	0.101724	4.41265e-09	0.408631	-0.28453	0.287419	-0.816115	0.167988	-0.139711	0.408394	-0.761728	0.286838	-0.558192	0.223094	-0.369349	0.303487
cg26429381	2	217639206			6	0.917958	0.121526	4.23507e-14	0.917958	0.121526	4.23507e-14	0.721886	0.744669	0.327298	1.1068	0.201718	0.682404	0.473468	0.952286	0.401825	1.00584	0.264576	0.529638	0.335955
cg04364261	2	219233650			5	-1.06392	0.166055	1.48341e-10	-1.06392	0.166055	1.48341e-10	0.599266	-1.07841	0.430917	-1.13956	0.267996	-0.392935	0.646984	-0.603554	0.470951	-1.31716	0.31529	NA	NA
cg20456243	2	220352476	SPEG	Body	6	0.878767	0.150465	5.20894e-09	0.881011	0.119081	1.37847e-13	0.195678	0.616519	0.314418	1.0609	0.209944	0.922741	0.450221	1.60476	0.370383	0.672044	0.236578	0.467488	0.362102
cg25717464	2	225265963	FAM124B;FAM124B	1stExon;1stExon	5	-0.714348	0.120856	3.40621e-09	-0.714348	0.120856	3.40621e-09	0.46073	-0.924883	0.34813	-0.598272	0.195456	-0.263739	0.402263	-0.560039	0.350529	-0.985259	0.2252	NA	NA
cg19108747	2	225266263	FAM124B;FAM124B	1stExon;1stExon	6	-0.856923	0.133312	1.29337e-10	-0.856923	0.133312	1.29337e-10	0.440642	-0.616488	0.346648	-1.12151	0.225716	-0.201244	0.489674	-0.920329	0.413428	-0.933195	0.261133	-0.320781	0.524701
cg10005565	2	235578952			6	0.886077	0.122518	4.75164e-13	0.886077	0.122518	4.75164e-13	0.939343	0.99288	0.312571	1.04675	0.240743	0.845039	0.374989	0.795933	0.401227	0.842132	0.240201	0.620345	0.343513
cg07163480	2	236007482			5	0.888652	0.113794	5.74909e-15	0.888652	0.113794	5.74909e-15	0.961974	0.687731	0.293358	0.947035	0.187621	0.923358	0.386594	0.951203	0.333726	0.883186	0.215523	NA	NA
cg15068641	2	236636823	AGAP1;AGAP1	Body;Body	6	0.561456	0.0989713	1.40384e-08	0.561456	0.0989713	1.40384e-08	0.520723	0.523715	0.274999	0.579209	0.169544	0.402935	0.41943	0.653235	0.298971	0.788448	0.201854	0.102232	0.281014
cg11010432	2	239540451			6	0.652115	0.108396	1.78735e-09	0.652115	0.108396	1.78735e-09	0.423113	0.674085	0.308458	0.941874	0.189484	0.562965	0.359138	0.458123	0.30496	0.361789	0.209638	0.849315	0.426915
cg06347943	2	240426297			6	1.13623	0.198289	1.00325e-08	1.12564	0.171572	5.35383e-11	0.25729	0.93799	0.430357	1.16713	0.339308	0.987951	0.471942	2.2417	0.491913	0.755752	0.371143	0.961795	0.499769
cg17280514	2	242755302	NEU4;NEU4;NEU4;NEU4;NEU4	Body;5'UTR;5'UTR;Body;5'UTR	6	0.890212	0.156468	1.27466e-08	0.902078	0.142418	2.38848e-10	0.325855	0.765387	0.374409	1.33328	0.259521	0.817068	0.533036	1.09416	0.38311	0.585133	0.280485	0.339185	0.483488
cg02276274	3	3839921	LRRN1	TSS1500	6	0.64212	0.109061	3.91546e-09	0.64212	0.109061	3.91546e-09	0.697972	0.59904	0.306528	0.875176	0.188672	0.351032	0.376472	0.654858	0.360325	0.566006	0.209628	0.335315	0.357485
cg05733104	3	9032419	SRGAP3;SRGAP3	Body;Body	6	0.881373	0.134792	6.20336e-11	0.881373	0.134792	6.20336e-11	0.60359	0.517457	0.361329	1.20658	0.236034	0.837128	0.407847	0.602614	0.417205	0.751458	0.280113	0.977411	0.450456
cg01177100	3	9176211	SRGAP3;SRGAP3	Body;Body	6	0.518045	0.0964944	7.93257e-08	0.518045	0.0964944	7.93257e-08	0.867058	0.532795	0.255774	0.509323	0.161631	0.937768	0.370287	0.405951	0.386675	0.403787	0.185633	0.620757	0.303825
cg13475822	3	9210116	SRGAP3;SRGAP3	Body;Body	6	0.625482	0.104612	2.2439e-09	0.63465	0.0923042	6.17157e-12	0.299985	0.975974	0.270971	0.806391	0.158498	0.388477	0.418676	0.562975	0.272957	0.561211	0.196634	0.253773	0.229692
cg04779796	3	11037353	SLC6A1	5'UTR	6	0.813587	0.138775	4.55566e-09	0.813587	0.138775	4.55566e-09	0.747921	0.747068	0.37313	0.720998	0.239703	1.00287	0.439601	1.0565	0.408008	1.0084	0.292914	0.231541	0.471325
cg24607283	3	11302249	HRH1;HRH1;HRH1;HRH1	3'UTR;3'UTR;3'UTR;3'UTR	6	0.771767	0.117277	4.68205e-11	0.771767	0.117277	4.68205e-11	0.662876	0.846414	0.311249	0.815215	0.204327	0.728035	0.418944	0.857053	0.352416	0.849088	0.224544	-0.0082563	0.454124
cg06143615	3	13462903	NUP210	TSS1500	6	0.585934	0.103912	1.7129e-08	0.596327	0.0914281	6.92086e-11	0.303833	0.269243	0.225635	0.631488	0.159855	0.283208	0.419247	0.903849	0.288819	0.787419	0.174124	0.286454	0.313188
cg27381979	3	13537787	HDAC11;HDAC11	Body;Body	6	0.68775	0.12408	2.97706e-08	0.68775	0.12408	2.97706e-08	0.614229	1.04123	0.335327	0.831995	0.222355	0.909418	0.4467	0.36446	0.3387	0.480399	0.230396	0.550693	0.55335
cg26121234	3	13899618	WNT7A	Body	6	1.07924	0.131261	1.99942e-16	1.07924	0.131261	1.99942e-16	0.586561	0.91582	0.342688	1.34694	0.224844	0.645957	0.538386	1.36724	0.399805	0.904663	0.274555	0.799493	0.384263
cg15975427	3	14879372	FGD5	Body	6	0.692863	0.117096	3.27718e-09	0.706538	0.0991932	1.05725e-12	0.270909	0.488792	0.281899	0.681018	0.167557	0.39477	0.363933	1.08703	0.36909	0.983943	0.190104	0.295658	0.303317
cg00390724	3	18484742			6	-1.70889	0.271961	3.30835e-10	-1.69991	0.229044	1.15588e-13	0.25475	-1.81472	0.630292	-1.69512	0.390056	-1.18101	0.779271	-3.23735	0.702775	-1.44115	0.473626	-0.960433	0.736726
cg02616769	3	22348099			6	0.592167	0.101094	4.69664e-09	0.592167	0.101094	4.69664e-09	0.434496	0.625737	0.287167	0.866157	0.176081	0.270965	0.357335	0.645301	0.296484	0.370292	0.203503	0.396809	0.314461
cg24837277	3	28721439			6	0.683709	0.0889863	1.5504e-14	0.683709	0.0889863	1.5504e-14	0.492857	0.396821	0.223356	0.855891	0.158087	0.606296	0.346184	0.893538	0.273443	0.699233	0.184968	0.438087	0.255822
cg00744866	3	33701209	CLASP2	Body	6	-1.08056	0.19182	1.769e-08	-1.13348	0.150427	4.88084e-14	0.183696	-0.796686	0.415014	-1.31483	0.263762	-0.230845	0.494787	-1.46187	0.427841	-1.46693	0.308025	-0.554416	0.504744
cg00252934	3	36782736	DCLK3	TSS1500	6	0.80637	0.126199	1.66255e-10	0.802263	0.104865	2.0026e-14	0.243624	1.23461	0.265227	0.780495	0.177978	0.763541	0.398377	1.14676	0.355434	0.679148	0.222319	0.292994	0.305661
cg08839272	3	42730382	KBTBD5	Body	6	0.696984	0.100311	3.69961e-12	0.696984	0.100311	3.69961e-12	0.600709	0.711095	0.292896	0.909699	0.168091	0.348978	0.426392	0.65154	0.303636	0.62188	0.191431	0.324803	0.339109
cg21979032	3	42917517	CYP8B1;CYP8B1	5'UTR;1stExon	6	0.583598	0.108075	6.66682e-08	0.583598	0.108075	6.66682e-08	0.859659	0.809699	0.311993	0.672577	0.189027	0.325579	0.36241	0.699873	0.354493	0.416909	0.227253	0.539625	0.283757
cg13344886	3	45167106	CDCP1;CDCP1	Body;Body	5	0.814551	0.146079	2.45995e-08	0.811116	0.113514	8.967e-13	0.208073	0.769418	0.269626	0.977659	0.18398	0.562743	0.550567	1.29489	0.335795	0.458019	0.212524	NA	NA
cg18599081	3	46448084	CCRL2;CCRL2	TSS1500;TSS1500	6	0.668712	0.12412	7.13999e-08	0.668712	0.12412	7.13999e-08	0.588051	0.859342	0.277104	0.407679	0.215171	0.260943	0.531679	0.678815	0.390337	0.949199	0.257922	0.72988	0.440429
cg11293800	3	48412924	FBXW12;FBXW12;FBXW12	TSS1500;TSS1500;TSS1500	6	0.512045	0.0947465	6.50393e-08	0.512045	0.0947465	6.50393e-08	0.476478	0.192671	0.236929	0.691632	0.158858	0.879935	0.375908	0.370929	0.285252	0.473096	0.197172	0.366083	0.335807
cg20116935	3	50303757	SEMA3B;SEMA3B	TSS1500;TSS1500	6	0.719256	0.122377	4.16767e-09	0.749018	0.0999983	6.87133e-14	0.248653	0.333043	0.289718	1.06656	0.168772	0.547288	0.454219	0.777052	0.314626	0.620814	0.181238	0.538902	0.362997
cg24632873	3	50561368			6	0.917005	0.124381	1.67371e-13	0.917005	0.124381	1.67371e-13	0.652084	0.766208	0.334138	1.24434	0.242683	1.15844	0.50575	0.936054	0.3515	0.709954	0.240427	0.733652	0.326166
cg10630880	3	52008682	ABHD14B;ABHD14B;ABHD14A;ABHD14B	TSS200;TSS200;TSS1500;TSS200	5	0.660501	0.113633	6.15198e-09	0.660501	0.113633	6.15198e-09	0.724894	0.534299	0.320608	0.808995	0.174834	0.733485	0.456781	0.772882	0.356772	0.442936	0.211518	NA	NA
cg24847554	3	57530606	DNAH12;DNAH12	TSS1500;TSS1500	6	-0.637594	0.111835	1.18956e-08	-0.637594	0.111835	1.18956e-08	0.747344	-0.591433	0.277817	-0.697314	0.191966	-0.500958	0.447278	-0.839361	0.316889	-0.743598	0.248739	-0.172989	0.338196
cg01361263	3	58051763	FLNB;FLNB;FLNB;FLNB	Body;Body;Body;Body	6	0.789478	0.116481	1.2207e-11	0.789478	0.116481	1.2207e-11	0.604435	0.609471	0.36393	0.817743	0.195693	1.10334	0.530951	1.25533	0.372469	0.7893	0.22908	0.413431	0.312658
cg16442402	3	58474266			6	0.597214	0.0956748	4.31649e-10	0.597214	0.0956748	4.31649e-10	0.733723	0.297008	0.248988	0.756518	0.163911	0.513996	0.419888	0.596202	0.273481	0.509883	0.205566	0.70832	0.275364
cg05709770	3	59703569			6	1.0678	0.120906	1.03162e-18	1.0678	0.120906	1.03162e-18	0.545181	0.991809	0.334371	1.31057	0.215222	1.5024	0.419808	0.721015	0.44381	0.870796	0.247886	0.877833	0.303592
cg01576260	3	63087235	LOC285401	TSS1500	6	0.732006	0.130488	2.0263e-08	0.759863	0.108232	2.20789e-12	0.240239	0.509559	0.257134	1.1363	0.188617	0.832264	0.402799	0.658752	0.329273	0.575391	0.224882	0.378205	0.378698
cg04394710	3	68039483			6	1.01712	0.160951	2.62465e-10	1.01712	0.160951	2.62465e-10	0.918976	1.14397	0.425249	1.04061	0.28531	1.17085	0.585595	0.923129	0.535406	0.744896	0.319565	1.35592	0.466715
cg19628600	3	71032216	FOXP1	Body	6	0.92588	0.133762	4.45727e-12	0.92588	0.133762	4.45727e-12	0.839021	0.849241	0.314686	1.05654	0.244148	0.581057	0.473283	1.22469	0.419161	0.968476	0.285924	0.608983	0.388429
cg24353443	3	73674166	PDZRN3	TSS200	6	-0.529436	0.0989653	8.80972e-08	-0.529436	0.0989653	8.80972e-08	0.679743	-0.364537	0.242187	-0.518272	0.161605	-0.621507	0.302468	-0.969713	0.310784	-0.38636	0.216535	-0.704216	0.490817
cg18337222	3	99595254	C3orf26;FILIP1L;MIR548G;FILIP1L;FILIP1L	Body;Body;Body;TSS1500;Body	6	-0.721526	0.11227	1.30408e-10	-0.721526	0.11227	1.30408e-10	0.595195	-0.536921	0.288367	-0.885748	0.186211	-0.531557	0.365747	-1.13931	0.356623	-0.553507	0.243757	-0.475082	0.398327
cg13709487	3	100322493			6	1.16409	0.171245	1.06215e-11	1.16409	0.171245	1.06215e-11	0.578572	1.53632	0.47145	1.19327	0.274523	1.32431	0.780101	1.88906	0.723876	1.0761	0.342644	0.469987	0.484306
cg07772781	3	101798142			6	-0.968224	0.166723	6.3458e-09	-0.968224	0.166723	6.3458e-09	0.8252	-0.619632	0.439161	-1.04508	0.290725	-0.750473	0.573337	-1.45874	0.524803	-0.820161	0.34524	-1.23049	0.506605
cg05133814	3	112135991			6	0.605236	0.103104	4.3541e-09	0.605236	0.103104	4.3541e-09	0.589656	0.454555	0.255671	0.826254	0.191624	0.404342	0.372512	0.638463	0.299118	0.691274	0.219165	0.246225	0.284715
cg06073417	3	119316673	PLA1A	TSS200	6	0.578347	0.102461	1.65614e-08	0.578347	0.102461	1.65614e-08	0.452152	0.5346	0.249211	0.755032	0.188903	0.541689	0.34762	0.925115	0.292201	0.392654	0.218244	0.173616	0.313947
cg16322565	3	119526221	NR1I2;NR1I2;NR1I2	Body;Body;Body	6	0.90667	0.153533	3.51816e-09	0.893364	0.143605	4.94029e-10	0.350382	0.858568	0.403585	0.490784	0.257517	1.52781	0.437329	1.28068	0.450975	1.03253	0.294475	0.796454	0.42278
cg04816013	3	123987591	KALRN;KALRN	Body;Body	6	0.956494	0.11899	9.09665e-16	0.963446	0.111595	5.9541e-18	0.356075	1.1759	0.319396	1.23244	0.194162	0.855067	0.399954	0.997471	0.358473	0.767136	0.230659	0.504328	0.299589
cg02118562	3	124082907	KALRN;KALRN	Body;Body	6	1.0441	0.168189	5.36949e-10	1.04478	0.127188	2.13085e-16	0.163748	1.46045	0.366109	1.2075	0.214759	1.80953	0.517363	0.712349	0.429634	0.854393	0.262222	0.497144	0.333746
cg00984696	3	124128381	KALRN;KALRN	Body;Body	6	0.970348	0.169809	1.10126e-08	0.922436	0.116328	2.19793e-15	0.103579	1.13108	0.314694	1.09264	0.200084	1.50676	0.431291	0.638179	0.399406	0.473449	0.211429	1.40642	0.456128
cg18008247	3	124719009	HEG1	Body	5	0.783323	0.130408	1.89319e-09	0.783323	0.130408	1.89319e-09	0.509546	1.07703	0.345443	0.522149	0.209737	0.972385	0.467243	0.586628	0.461764	0.975102	0.233006	NA	NA
cg16143049	3	124768294	HEG1	Body	6	0.486104	0.0862178	1.7195e-08	0.508254	0.0718633	1.52152e-12	0.248981	0.324656	0.180403	0.617652	0.120758	0.0331873	0.283904	0.417754	0.226459	0.697007	0.152254	0.386718	0.227686
cg17478992	3	124873768	SLC12A8	Body	6	0.720334	0.119698	1.76664e-09	0.720334	0.119698	1.76664e-09	0.840163	0.802183	0.318872	0.841509	0.199399	0.633675	0.474108	0.563826	0.364697	0.787215	0.259647	0.310491	0.353352
cg14857193	3	125852009	ALDH1L1	Body	5	0.720727	0.122509	4.02762e-09	0.720727	0.122509	4.02762e-09	0.586389	0.314746	0.319262	0.81902	0.208996	0.519653	0.386761	0.994731	0.325229	0.748077	0.237123	NA	NA
cg08822136	3	127345113			6	1.04687	0.182346	9.40439e-09	1.04687	0.182346	9.40439e-09	0.448813	1.46828	0.473994	1.10018	0.31752	1.67707	0.576541	1.27006	0.658456	0.453606	0.375408	0.863098	0.550911
cg14469436	3	127441359	MGLL;MGLL	Body;Body	6	0.527543	0.0961388	4.08105e-08	0.527543	0.0961388	4.08105e-08	0.9454	0.523906	0.274017	0.641438	0.168697	0.409644	0.391428	0.28412	0.306793	0.502783	0.187434	0.535111	0.266114
cg26861995	3	127831673	RUVBL1	Body	6	0.766967	0.124742	7.82492e-10	0.775001	0.107187	4.81603e-13	0.275476	1.10533	0.295105	0.959303	0.181584	1.00243	0.368846	0.331916	0.359397	0.463598	0.221096	0.645494	0.32141
cg04451880	3	128717483			5	-0.927192	0.169029	4.12528e-08	-0.927192	0.169029	4.12528e-08	0.428602	-0.60254	0.402353	-1.27777	0.278574	-0.487633	0.635671	-1.22271	0.489754	-0.641362	0.328023	NA	NA
cg24287460	3	128748026	CCDC48	Body	6	0.477015	0.0873451	4.72738e-08	0.477015	0.0873451	4.72738e-08	0.709942	0.615809	0.214208	0.554263	0.14517	0.142373	0.355389	0.523041	0.266994	0.225193	0.220555	0.502387	0.22746
cg05526364	3	129205070	IFT122;IFT122;IFT122;IFT122	Body;Body;Body;Body	6	0.958047	0.155242	6.77315e-10	0.971642	0.130175	8.38537e-14	0.242362	0.706506	0.327775	1.31432	0.229167	0.829342	0.46682	1.32947	0.401446	0.48821	0.282976	1.02755	0.368068
cg13180098	3	129246923	RHO	TSS1500	6	0.491974	0.0869178	1.51176e-08	0.491974	0.0869178	1.51176e-08	0.491953	0.513117	0.214527	0.693865	0.149596	0.199035	0.315771	0.607112	0.274475	0.287927	0.194049	0.327175	0.249262
cg26283480	3	129252584	RHO	3'UTR	6	0.47761	0.0878992	5.5225e-08	0.47761	0.0878992	5.5225e-08	0.836272	0.314293	0.243245	0.509198	0.142166	0.491524	0.346939	0.715746	0.277814	0.498598	0.173753	0.166037	0.339771
cg18718692	3	133121913	BFSP2	Body	6	0.712346	0.126568	1.82144e-08	0.718077	0.103378	3.7543e-12	0.215804	0.55349	0.285728	0.81746	0.181687	0.662657	0.332448	1.28987	0.337105	0.782581	0.224913	0.2111	0.273047
cg11886884	3	138062860			6	0.876588	0.132898	4.22558e-11	0.886588	0.111839	2.23857e-15	0.250452	0.887538	0.307643	1.07439	0.193207	1.15891	0.420557	1.13949	0.346836	0.795274	0.237547	0.238794	0.302807
cg00672277	3	138169728	ESYT3	Body	6	0.842435	0.143	3.83458e-09	0.842435	0.143	3.83458e-09	0.480373	0.635967	0.372747	1.17472	0.246769	0.752145	0.550612	1.03925	0.390661	0.613728	0.286432	0.171987	0.555229
cg06090362	3	140396963	TRIM42;TRIM42	1stExon;5'UTR	6	0.602333	0.105272	1.05457e-08	0.602333	0.105272	1.05457e-08	0.646933	0.544701	0.285278	0.860822	0.18679	0.567444	0.431215	0.632881	0.329286	0.432915	0.212193	0.359343	0.283102
cg00201457	3	140405436	TRIM42	Body	6	0.909403	0.140797	1.0543e-10	0.90825	0.136306	2.67676e-11	0.387012	1.28406	0.339622	0.931609	0.244516	1.44082	0.449943	0.83948	0.448623	0.686787	0.26161	0.21697	0.505814
cg27416372	3	147110229	ZIC4;ZIC4;ZIC4;ZIC4;ZIC4	Body;TSS200;TSS200;Body;Body	5	-0.515575	0.0953792	6.46167e-08	-0.515575	0.0953792	6.46167e-08	0.503344	-0.246908	0.253868	-0.486266	0.153819	-0.356487	0.275936	-0.863604	0.292344	-0.64098	0.19136	NA	NA
cg14630032	3	148898124	CP	Body	6	0.648079	0.116807	2.88488e-08	0.669581	0.103514	9.89833e-11	0.311288	0.586365	0.260068	0.81818	0.174477	-0.35068	0.549483	0.418695	0.325188	0.846415	0.209553	0.479796	0.313884
cg13634423	3	151596028	SUCNR1	5'UTR	6	0.77261	0.121989	2.39777e-10	0.77261	0.121989	2.39777e-10	0.430716	1.03867	0.287278	1.08951	0.239977	0.564639	0.377605	0.626083	0.341394	0.595664	0.319663	0.425749	0.284705
cg15034393	3	152856773			6	1.04517	0.167149	4.02831e-10	1.0626	0.151595	2.39277e-12	0.327288	0.960356	0.41734	1.31602	0.254237	1.35217	0.614303	1.12823	0.42591	1.07834	0.326152	0.0894441	0.459405
cg10638793	3	169027604	MECOM	Body	6	0.596729	0.107176	2.58046e-08	0.596729	0.107176	2.58046e-08	0.970794	0.422035	0.249827	0.676763	0.190918	0.664686	0.333471	0.716446	0.337064	0.538731	0.237722	0.592378	0.35114
cg14572252	3	169309425	MECOM	Body	6	0.742306	0.117411	2.57738e-10	0.742306	0.117411	2.57738e-10	0.470035	0.642031	0.273331	0.979184	0.205383	0.943319	0.373592	0.902057	0.349685	0.324844	0.2809	0.509626	0.366801
cg14016236	3	171792545	FNDC3B;FNDC3B	5'UTR;5'UTR	6	-0.902367	0.157678	1.04762e-08	-0.902367	0.157678	1.04762e-08	0.686398	-0.635759	0.453713	-0.973127	0.256867	-0.611991	0.683011	-1.34493	0.485666	-1.1052	0.347963	-0.416075	0.423893
cg02099877	3	172416062	NCEH1;NCEH1;NCEH1;NCEH1	5'UTR;Body;Body;5'UTR	6	0.939219	0.164339	1.09616e-08	0.939219	0.164339	1.09616e-08	0.514445	1.28709	0.387483	1.16679	0.307895	1.09785	0.54901	0.713652	0.476936	0.774042	0.338063	0.102434	0.546008
cg11270278	3	177039618			6	-0.97546	0.178363	4.52657e-08	-0.97546	0.178363	4.52657e-08	0.491434	-0.50073	0.495576	-1.3756	0.291522	-0.553535	0.718771	-1.10375	0.523772	-0.575757	0.373914	-1.1266	0.591134
cg17805547	3	180710218			6	0.594122	0.108681	4.58637e-08	0.594122	0.108681	4.58637e-08	0.467326	0.547561	0.269475	0.774669	0.193651	0.399225	0.387999	0.784349	0.313499	0.595312	0.224752	-0.0414955	0.362472
cg18030943	3	182876556	LAMP3	Body	6	0.613729	0.109638	2.17121e-08	0.614047	0.108549	1.54153e-08	0.406964	0.832024	0.323841	0.813575	0.18812	0.936705	0.392176	0.591639	0.364956	0.318001	0.225666	0.328653	0.272872
cg17210535	3	182984429	MCF2L2;B3GNT5	Body;5'UTR	6	0.806756	0.136496	3.41118e-09	0.806756	0.136496	3.41118e-09	0.590188	1.24867	0.344984	0.730834	0.253543	0.986153	0.488502	1.03643	0.3917	0.655469	0.291666	0.392735	0.371343
cg02573551	3	184299439	EPHB3	3'UTR	6	0.574073	0.101671	1.63876e-08	0.585389	0.0798179	2.23301e-13	0.205459	0.510056	0.234847	0.699216	0.129335	0.295572	0.314002	1.03146	0.240524	0.400074	0.162421	0.353155	0.270008
cg15045153	3	189693045	LEPREL1;LEPREL1	Body;Body	6	1.14802	0.18653	7.52567e-10	1.15575	0.131498	1.50769e-18	0.102544	0.668684	0.336947	1.48939	0.23206	2.24077	0.622847	0.854065	0.378864	0.846047	0.285523	1.29444	0.340159
cg27235662	3	190105986	CLDN16	1stExon	6	0.799091	0.143392	2.5069e-08	0.831709	0.11876	2.50012e-12	0.230438	0.938346	0.323213	1.19776	0.211586	0.784719	0.417505	0.267226	0.370885	0.75666	0.246884	0.456688	0.323088
cg20186588	3	193545238			6	0.635325	0.118693	8.66561e-08	0.648207	0.108584	2.37815e-09	0.33146	0.519852	0.283301	0.919123	0.190924	-0.00166424	0.413663	0.85548	0.310497	0.511949	0.224031	0.480761	0.337484
cg10728473	3	197226514			6	0.646216	0.107523	1.85502e-09	0.646216	0.107523	1.85502e-09	0.726873	0.758964	0.291822	0.629079	0.189117	0.196644	0.491593	1.07484	0.399961	0.678989	0.193943	0.388004	0.31914
cg14988083	4	1804492	FGFR3;FGFR3;FGFR3	Body;Body;Body	6	1.08093	0.148249	3.07034e-13	1.08208	0.147622	2.29959e-13	0.41218	1.09713	0.443982	1.37781	0.253201	0.457276	0.534091	0.615036	0.42641	1.26172	0.299529	0.700595	0.444317
cg14711869	4	2716524	FAM193A	Body	6	0.924908	0.148095	4.22849e-10	0.939013	0.120162	5.51499e-15	0.224605	0.957488	0.33711	1.24769	0.20689	1.37839	0.393617	0.694924	0.403033	0.594271	0.233039	0.5504	0.405852
cg17569842	4	3371566	RGS12;RGS12;RGS12	Body;TSS200;Body	6	-1.08918	0.19976	4.96749e-08	-1.08918	0.19976	4.96749e-08	0.83408	-0.805319	0.517543	-1.1107	0.342546	-0.92268	0.798461	-1.78141	0.558423	-1.01596	0.417084	-0.799191	0.662191
cg16357969	4	3646912			6	0.693835	0.11639	2.50225e-09	0.693835	0.11639	2.50225e-09	0.64514	0.933066	0.30955	0.659096	0.197676	0.605695	0.549234	1.05696	0.3459	0.613555	0.216289	0.13842	0.45917
cg20038070	4	4482826	STX18	Body	6	0.808309	0.150332	7.58116e-08	0.851423	0.119692	1.13192e-12	0.225303	0.664231	0.302266	1.24208	0.202114	-0.132067	0.88381	0.802372	0.334901	0.653854	0.23023	0.458083	0.433759
cg22325673	4	6377625	PPP2R2C;PPP2R2C	Body;Body	6	0.827711	0.145086	1.16351e-08	0.827711	0.145086	1.16351e-08	0.522237	0.312642	0.390111	1.05402	0.259099	0.478892	0.495165	1.2737	0.431991	0.808683	0.286197	0.663494	0.477067
cg18544809	4	6380812	PPP2R2C;PPP2R2C	Body;Body	6	0.960078	0.147812	8.28768e-11	0.960078	0.147812	8.28768e-11	0.813407	0.687445	0.399773	0.777407	0.263835	1.10019	0.620699	1.35603	0.388082	1.09285	0.2933	0.912034	0.482958
cg16788014	4	6451016	PPP2R2C	Body	6	0.75636	0.1182	1.56425e-10	0.759771	0.114702	3.49885e-11	0.389451	0.56086	0.319808	0.639893	0.206149	0.476079	0.463421	0.783898	0.315342	1.1473	0.216243	0.389668	0.389192
cg01613048	4	7131403			6	0.604307	0.11146	5.90185e-08	0.607141	0.108535	2.21963e-08	0.39329	0.076637	0.313554	0.650891	0.184253	0.392262	0.447769	0.787525	0.353534	0.870582	0.217212	0.440365	0.300423
cg22357679	4	7486772	SORCS2	Body	6	0.679044	0.118117	8.98287e-09	0.697512	0.103271	1.43599e-11	0.294414	0.668466	0.260215	0.921049	0.185755	0.987472	0.510411	0.244317	0.30301	0.774276	0.195722	0.236776	0.330018
cg19420930	4	7667618	SORCS2	Body	6	0.89027	0.165577	7.58268e-08	0.899411	0.125829	8.81266e-13	0.161118	0.58278	0.324729	0.678041	0.22769	0.880965	0.394452	1.44215	0.399442	1.28616	0.240992	0.302747	0.472767
cg06606539	4	11369730	MIR572	TSS1500	5	0.902133	0.154207	4.91152e-09	0.902133	0.154207	4.91152e-09	0.940439	0.862897	0.372107	1.0292	0.249665	0.926654	0.637672	0.59506	0.429409	0.888365	0.302822	NA	NA
cg10051588	4	16255438	FLJ39653;FLJ39653	Body;Body	6	0.543876	0.101511	8.42481e-08	0.543876	0.101511	8.42481e-08	0.865833	0.487529	0.239687	0.674212	0.181343	0.62625	0.357472	0.705216	0.300754	0.365598	0.226297	0.365561	0.303991
cg04460609	4	16532808	LDB2;LDB2	Body;Body	6	1.04504	0.186646	2.15567e-08	1.04054	0.166239	3.86743e-10	0.297569	1.16747	0.444769	1.39733	0.308439	1.24715	0.519406	1.17348	0.480781	0.33119	0.338786	1.15602	0.508116
cg22453435	4	38667430	FLJ13197;KLF3	TSS1500;5'UTR	6	-0.574159	0.0973021	3.61787e-09	-0.574159	0.0973021	3.61787e-09	0.831411	-0.611994	0.295417	-0.716317	0.160447	-0.409694	0.349569	-0.489829	0.263231	-0.565888	0.211247	-0.262588	0.311674
cg18183961	4	40519094	RBM47;RBM47	TSS1500;5'UTR	6	0.689286	0.111526	6.38909e-10	0.689286	0.111526	6.38909e-10	0.990494	0.578108	0.313283	0.766034	0.184414	0.644431	0.408457	0.705544	0.380362	0.711731	0.229168	0.531828	0.33598
cg08949974	4	40632860	RBM47	TSS1500	6	-0.841333	0.132043	1.86998e-10	-0.82853	0.11571	8.04498e-13	0.312027	-0.567907	0.367976	-0.639898	0.179655	-1.36511	0.571808	-0.933963	0.350419	-1.25607	0.246559	-0.625104	0.339639
cg10469791	4	42895240	GRXCR1	TSS200	6	0.758962	0.128449	3.44877e-09	0.758962	0.128449	3.44877e-09	0.68291	0.703447	0.318533	0.975525	0.234197	0.948153	0.405466	0.861509	0.352941	0.543531	0.266211	0.215887	0.482222
cg02886077	4	48779921	FRYL	5'UTR	6	-0.676963	0.107786	3.37182e-10	-0.676963	0.107786	3.37182e-10	0.835814	-0.641221	0.297638	-0.838784	0.182755	-0.595609	0.383599	-0.739069	0.294222	-0.587183	0.234753	-0.320559	0.346005
cg23939182	4	54461431			6	0.897629	0.107649	7.524e-17	0.897629	0.107649	7.524e-17	0.464478	0.690732	0.274347	1.05709	0.182192	0.311785	0.396425	1.19019	0.317752	0.926683	0.258287	0.754797	0.293296
cg20618651	4	56718365	EXOC1;EXOC1;EXOC1	TSS1500;TSS1500;TSS1500	6	0.720156	0.132938	6.05353e-08	0.720156	0.132938	6.05353e-08	0.611641	0.712472	0.345757	0.733534	0.228656	0.72907	0.52583	1.20801	0.358285	0.655559	0.29927	0.21365	0.391594
cg23099587	4	74570525			6	-0.476922	0.0805578	3.21466e-09	-0.476922	0.0805578	3.21466e-09	0.644451	-0.354906	0.253555	-0.424649	0.126919	-1.06884	0.374655	-0.451866	0.215884	-0.581252	0.18517	-0.392541	0.231163
cg18356190	4	74964260	CXCL2	Body	6	-0.6693	0.114339	4.8085e-09	-0.6693	0.114339	4.8085e-09	0.686847	-0.930455	0.334611	-0.574314	0.186875	-0.502516	0.412532	-0.48226	0.350144	-0.951231	0.243596	-0.438197	0.352664
cg22301128	4	77011716	ART3;ART3;ART3	Body;Body;Body	6	-0.884333	0.160939	3.91091e-08	-0.896743	0.149797	2.14559e-09	0.347331	-1.07805	0.387575	-1.18752	0.261792	-0.804587	0.663623	-0.795199	0.406391	-0.934908	0.335124	-0.0809833	0.405322
cg01807825	4	80329368	GK2;GK2	1stExon;5'UTR	6	0.834365	0.136578	1.00214e-09	0.834365	0.136578	1.00214e-09	0.884134	0.722252	0.352134	1.08299	0.24231	0.740937	0.38086	0.790516	0.485378	0.630613	0.28394	0.839828	0.448532
cg01174264	4	80992999	ANTXR2;ANTXR2	Body;Body	6	-0.52615	0.0827765	2.06715e-10	-0.52615	0.0827765	2.06715e-10	0.540813	-0.366651	0.215149	-0.498645	0.136465	-0.590923	0.351144	-0.459349	0.227634	-0.836114	0.188064	-0.320432	0.258544
cg01777812	4	90117697			6	0.819273	0.100473	3.51712e-16	0.819273	0.100473	3.51712e-16	0.772869	0.661132	0.261267	0.983373	0.184481	1.01914	0.336269	0.927154	0.313819	0.702726	0.197	0.588829	0.312162
cg03024478	4	96090330	UNC5C	3'UTR	6	0.643442	0.112676	1.12619e-08	0.643442	0.112676	1.12619e-08	0.903373	0.538772	0.280765	0.773696	0.198316	0.895009	0.367149	0.427732	0.371216	0.563186	0.231921	0.536102	0.367946
cg00353330	4	101715708			6	0.842972	0.155898	6.40132e-08	0.861821	0.13952	6.53144e-10	0.311065	0.834153	0.340979	1.2567	0.241692	1.16431	0.517539	0.341146	0.412162	0.550047	0.297972	0.636443	0.457903
cg17714799	4	110625080	CASP6;CASP6	TSS1500;TSS1500	6	-1.21238	0.202394	2.09579e-09	-1.14976	0.148053	8.10799e-15	0.139952	-1.76296	0.482365	-0.941222	0.242322	-1.68954	0.512366	-1.83289	0.504511	-1.20087	0.31276	-0.463361	0.397389
cg16273979	4	122376685			5	0.814941	0.152302	8.75603e-08	0.814941	0.152302	8.75603e-08	0.705447	0.864006	0.343855	1.0318	0.264866	0.934286	0.44513	0.298452	0.51923	0.626615	0.29307	NA	NA
cg09839177	4	124791563	LOC285419	Body	5	0.963042	0.175867	4.3514e-08	0.982042	0.121586	6.64252e-16	0.111549	0.7823	0.278096	1.26965	0.197403	0.804785	0.459015	1.40225	0.35301	0.531904	0.247834	NA	NA
cg06567920	4	129582864			6	0.81641	0.136346	2.12753e-09	0.81641	0.136346	2.12753e-09	0.933934	0.559279	0.306626	0.896468	0.248431	1.03048	0.492762	1.01729	0.442277	0.740706	0.286038	0.89904	0.426418
cg13443950	4	138584567			6	0.755385	0.124221	1.1947e-09	0.755385	0.124221	1.1947e-09	0.530389	0.865275	0.311255	0.965267	0.198535	0.631523	0.405963	0.855376	0.36168	0.328638	0.299272	0.352256	0.485939
cg03732759	4	139480684			6	0.728904	0.135344	7.22234e-08	0.728904	0.135344	7.22234e-08	0.580028	0.916338	0.306454	0.713864	0.240293	1.46206	0.494528	0.532266	0.386061	0.586714	0.29659	0.325655	0.473649
cg01300684	4	141230118	SCOC	5'UTR	6	0.867569	0.126204	6.22686e-12	0.901457	0.106412	2.42541e-17	0.255992	0.81972	0.26974	1.19562	0.179826	0.219002	0.428885	0.921143	0.337591	0.862472	0.235425	0.573753	0.296302
cg03729204	4	141266309	SCOC;SCOC;SCOC;SCOC;SCOC	Body;Body;Body;Body;Body	6	0.804562	0.130259	6.54737e-10	0.836597	0.108906	1.56822e-14	0.248923	0.688168	0.295606	1.04343	0.181247	0.697807	0.395658	0.876509	0.303957	0.953051	0.241128	0.0700879	0.353157
cg25424525	4	146096030	OTUD4;OTUD4;OTUD4	5'UTR;5'UTR;5'UTR	6	0.461972	0.0828455	2.45677e-08	0.461972	0.0828455	2.45677e-08	0.429101	0.423409	0.20511	0.688363	0.14965	0.0854345	0.324852	0.513287	0.235964	0.269389	0.178458	0.434927	0.23286
cg04425005	4	146783253	ZNF827	Body	6	0.66344	0.0912413	3.56122e-13	0.66344	0.0912413	3.56122e-13	0.513589	0.3775	0.221865	0.66931	0.150538	0.431884	0.409641	1.07126	0.329971	0.819645	0.192073	0.585257	0.272897
cg24520479	4	163906031			6	0.63807	0.114093	2.23781e-08	0.63807	0.114093	2.23781e-08	0.762928	0.469541	0.342754	0.867472	0.200346	0.752486	0.405468	0.668879	0.35019	0.475041	0.236662	0.433091	0.29743
cg12769732	4	170913525	MFAP3L;MFAP3L	Body;5'UTR	6	0.631518	0.109119	7.14651e-09	0.644228	0.100173	1.26628e-10	0.33167	0.224274	0.284432	0.867043	0.173642	0.747078	0.297888	0.600429	0.309185	0.726916	0.224403	0.28205	0.282388
cg14232128	4	183207543			6	0.708335	0.111198	1.88967e-10	0.708965	0.108309	5.91927e-11	0.389094	0.680569	0.283159	0.79404	0.197127	0.308009	0.299034	1.27232	0.330065	0.653468	0.238428	0.538806	0.331744
cg10716612	4	184113429	WWC2	Body	6	0.893713	0.165725	6.93914e-08	0.914026	0.119115	1.67415e-14	0.110289	1.04052	0.302681	1.29693	0.221288	1.4496	0.494907	0.563575	0.354425	0.739453	0.24271	0.3576	0.31428
cg25105917	4	184939030			5	0.565603	0.091062	5.25862e-10	0.579216	0.0827238	2.52692e-12	0.329118	0.621444	0.204952	0.758755	0.129436	0.253605	0.273512	0.35892	0.24296	0.466702	0.175881	NA	NA
cg00519884	4	185017300	ENPP6	Body	6	0.514498	0.09076	1.43819e-08	0.514498	0.09076	1.43819e-08	0.450793	0.568635	0.222168	0.645456	0.162719	0.305773	0.315692	0.66902	0.259006	0.517861	0.196289	0.0063627	0.283123
cg07965335	4	186709261	SORBS2;SORBS2;SORBS2;SORBS2;SORBS2	5'UTR;5'UTR;5'UTR;5'UTR;5'UTR	6	0.550275	0.101264	5.50819e-08	0.550275	0.101264	5.50819e-08	0.536	0.553943	0.238338	0.789703	0.181055	0.202016	0.354614	0.228745	0.308118	0.572919	0.21914	0.383583	0.314645
cg02385153	5	404766	AHRR;LOC100310782	Body;TSS200	6	0.732583	0.0994677	1.77095e-13	0.732583	0.0994677	1.77095e-13	0.547177	0.842913	0.253693	0.946901	0.165782	0.516292	0.355368	0.465745	0.273208	0.540465	0.210972	0.749666	0.431641
cg19503640	5	1503763	LPCAT1	Body	6	-0.930959	0.160803	7.06226e-09	-0.930959	0.160803	7.06226e-09	0.492018	-0.965415	0.377346	-1.11919	0.270399	-0.843371	0.604799	-1.50913	0.480315	-0.402798	0.375733	-0.579827	0.511538
cg27629673	5	7462856	ADCY2	Body	6	0.659079	0.119415	3.40517e-08	0.659079	0.119415	3.40517e-08	0.781771	0.892898	0.300941	0.591702	0.218277	0.994199	0.437034	0.877205	0.367606	0.468816	0.218108	0.538151	0.474638
cg17665505	5	10685203	DAP	Body	6	0.685312	0.125668	4.94297e-08	0.722463	0.0987126	2.50105e-13	0.180562	0.72782	0.249126	1.01412	0.171494	0.103063	0.329099	0.835447	0.311977	0.606376	0.223496	0.48209	0.277522
cg15333932	5	16735498	MYO10	Body	6	0.497621	0.0875658	1.32491e-08	0.497621	0.0875658	1.32491e-08	0.515455	0.249197	0.261447	0.552907	0.141	0.426686	0.335531	0.464111	0.235715	0.702249	0.182885	0.034692	0.338869
cg16413763	5	16737972	MYO10	Body	6	0.860976	0.140112	8.00109e-10	0.860976	0.140112	8.00109e-10	0.670522	0.757551	0.348082	1.0493	0.269804	0.909354	0.469559	0.868247	0.42159	0.491704	0.286641	1.23898	0.3888
cg11669284	5	37721782	WDR70	Body	6	1.09109	0.202038	6.64832e-08	1.09109	0.202038	6.64832e-08	0.889955	1.02599	0.452788	0.997388	0.355855	1.75444	0.758509	0.684317	0.584036	1.34092	0.436904	0.974426	0.742239
cg24619276	5	38462772	EGFLAM;EGFLAM;EGFLAM;EGFLAM	Body;Body;Body;Body	6	0.664169	0.123531	7.59274e-08	0.660982	0.120358	3.97844e-08	0.393582	0.562771	0.325	0.360156	0.206403	0.955581	0.436477	1.03694	0.409669	0.95355	0.236768	0.51702	0.376729
cg01065586	5	52404911	MOCS2;MOCS2	Body;5'UTR	6	-0.631745	0.110666	1.13928e-08	-0.636837	0.106499	2.23476e-09	0.385887	-0.510947	0.281697	-0.696586	0.17215	0.0884116	0.631275	-0.290505	0.311709	-0.960059	0.2228	-0.461461	0.33565
cg22021794	5	54177306			6	0.683179	0.12661	6.81628e-08	0.701812	0.113335	5.92723e-10	0.316702	0.574928	0.278672	1.01727	0.186853	0.581733	0.391731	0.777842	0.43571	0.626354	0.321887	0.279525	0.259082
cg27303933	5	56029418			6	0.487363	0.0885156	3.67161e-08	0.487363	0.0885156	3.67161e-08	0.561292	0.248838	0.248651	0.701903	0.152603	0.366326	0.315544	0.597642	0.300711	0.414436	0.18188	0.303837	0.241224
cg10166664	5	60624229			6	1.07374	0.190494	1.73449e-08	1.07374	0.190494	1.73449e-08	0.431796	1.18318	0.494077	1.44699	0.336245	1.38121	0.831821	1.10533	0.534591	0.913762	0.395454	0.0723597	0.552401
cg19820287	5	71240614			6	0.781568	0.118259	3.87042e-11	0.781568	0.118259	3.87042e-11	0.692334	0.651532	0.295667	1.01604	0.21236	0.174085	0.561164	0.91259	0.34656	0.656908	0.253643	0.695277	0.303656
cg07435275	5	72471841			5	0.74146	0.13282	2.37185e-08	0.74568	0.124175	1.91258e-09	0.349325	0.982945	0.303551	0.931576	0.211895	0.875799	0.450282	0.192286	0.34405	0.599514	0.233454	NA	NA
cg12942161	5	72660351			6	0.990224	0.178644	2.97347e-08	0.990224	0.178644	2.97347e-08	0.994599	1.15747	0.424163	0.893016	0.318551	1.21167	0.590786	0.900354	0.556682	0.955869	0.367332	0.964792	0.643039
cg20417024	5	76028950	F2R	Body	6	1.17526	0.198481	3.19442e-09	1.18557	0.111673	2.49882e-26	0.0117713	0.995662	0.27827	1.2859	0.203367	0.769405	0.385423	2.2132	0.350669	1.23879	0.234844	0.542496	0.314687
cg23398700	5	78808194	HOMER1	Body	6	-0.59044	0.0998567	3.36188e-09	-0.59044	0.0998567	3.36188e-09	0.499287	-0.243689	0.275461	-0.64002	0.149506	-0.929892	0.432805	-0.249351	0.315385	-0.789203	0.214845	-0.526927	0.433841
cg26413942	5	124081751	ZNF608	TSS1500	6	-0.86938	0.147346	3.62941e-09	-0.879362	0.126672	3.86463e-12	0.270992	-0.647478	0.343309	-0.886098	0.216452	-0.151743	0.449831	-1.43486	0.380924	-1.1246	0.274175	-0.652208	0.368689
cg20744943	5	126988869	CTXN3;CTXN3;CTXN3	5'UTR;1stExon;5'UTR	6	0.815124	0.144166	1.56707e-08	0.844737	0.102906	2.2341e-16	0.10334	0.692852	0.24046	1.1844	0.187218	0.668741	0.353105	1.1982	0.352426	0.784011	0.225855	0.2796	0.27809
cg14790000	5	127805611	FBN2	Body	5	1.17468	0.142151	1.41338e-16	1.17468	0.142151	1.41338e-16	0.938504	1.09006	0.323611	1.23991	0.244469	0.943786	0.47244	1.42314	0.405467	1.11458	0.281229	NA	NA
cg01883408	5	132083691	CCNI2	Body	6	0.705218	0.127144	2.91268e-08	0.705218	0.127144	2.91268e-08	0.553819	0.290523	0.356549	0.726544	0.225271	0.362132	0.340319	1.08688	0.355116	0.864879	0.254707	0.842262	0.657969
cg27038382	5	132534569	FSTL4	3'UTR	6	0.666233	0.120838	3.51933e-08	0.666233	0.120838	3.51933e-08	0.858682	0.611412	0.339056	0.852583	0.211547	0.645602	0.421443	0.689638	0.351297	0.604309	0.244947	0.278637	0.376894
cg09875213	5	134786596	TIFAB	5'UTR	6	0.703747	0.101943	5.08039e-12	0.703747	0.101943	5.08039e-12	0.430343	0.658111	0.25567	0.818518	0.180549	0.597192	0.373291	0.933769	0.32629	0.803151	0.211665	0.137056	0.296705
cg23235384	5	137206356	MYOT;MYOT	Body;5'UTR	6	0.507611	0.088511	9.75092e-09	0.507611	0.088511	9.75092e-09	0.813058	0.549493	0.206549	0.574966	0.15531	0.0334602	0.423262	0.315953	0.275611	0.595318	0.18894	0.441241	0.250085
cg04104695	5	139058749	CXXC5	5'UTR	6	-0.625451	0.108182	7.40459e-09	-0.625451	0.108182	7.40459e-09	0.978471	-0.66202	0.294954	-0.616414	0.186483	-0.779767	0.390252	-0.796397	0.355047	-0.494704	0.216644	-0.652699	0.326325
cg22739858	5	142053365	FGF1;FGF1;FGF1;FGF1;FGF1;FGF1	5'UTR;5'UTR;5'UTR;5'UTR;Body;Body	5	0.973585	0.141405	5.77563e-12	0.990537	0.118126	5.05425e-17	0.250883	0.690453	0.278447	1.345	0.203917	0.76876	0.455081	1.06229	0.321421	0.778892	0.222438	NA	NA
cg20666307	5	144490992			6	0.785453	0.145744	7.07533e-08	0.785453	0.145744	7.07533e-08	0.938637	0.646826	0.345058	0.892395	0.255352	1.26286	0.580512	0.673843	0.421297	0.751547	0.32429	0.605559	0.43718
cg09660867	5	148785816	LOC728264	TSS1500	5	0.927235	0.13222	2.33582e-12	0.927235	0.13222	2.33582e-12	0.689936	1.05629	0.328401	1.1014	0.222613	0.601807	0.457516	1.03084	0.387778	0.691648	0.24752	NA	NA
cg00226225	5	148785846	LOC728264	TSS1500	5	0.866906	0.150322	8.06994e-09	0.866906	0.150322	8.06994e-09	0.560842	0.486713	0.344228	0.902343	0.255033	1.03458	0.510372	1.45402	0.464958	0.808806	0.288971	NA	NA
cg14051336	5	149515317	PDGFRB	Body	6	0.52108	0.0905896	8.81437e-09	0.52108	0.0905896	8.81437e-09	0.7804	0.443958	0.282269	0.602296	0.153898	0.364327	0.310295	0.758939	0.266272	0.505263	0.184003	0.236106	0.276749
cg02724909	5	149625104	CAMK2A;CAMK2A	Body;Body	6	0.704084	0.0997151	1.65359e-12	0.704084	0.0997151	1.65359e-12	0.478496	1.04345	0.289133	0.856255	0.162458	0.394323	0.344259	0.663648	0.323702	0.507274	0.222893	0.47697	0.281595
cg03405473	5	149680926	ARSI	Body	6	0.58484	0.10195	9.66269e-09	0.591968	0.0950955	4.81596e-10	0.345834	0.542453	0.235576	0.663573	0.173179	0.6496	0.287469	0.45552	0.272455	0.824734	0.203283	-0.0418163	0.325354
cg24870828	5	149953322			6	0.693599	0.118178	4.38118e-09	0.693599	0.118178	4.38118e-09	0.863929	0.632577	0.355409	0.633471	0.195973	0.567522	0.467204	1.15969	0.39426	0.606738	0.236043	0.830241	0.339321
cg13590277	5	150019496	SYNPO;SYNPO;SYNPO;SYNPO	TSS1500;Body;Body;TSS1500	6	0.649462	0.0892718	3.4614e-13	0.649462	0.0892718	3.4614e-13	0.418619	0.57899	0.248697	0.761839	0.150593	0.906682	0.35753	0.399154	0.267957	0.732406	0.172151	0.120727	0.320703
cg23290159	5	150474234			6	0.815321	0.129505	3.06024e-10	0.83158	0.10487	2.19763e-15	0.225946	1.2863	0.308579	1.04689	0.175088	0.68312	0.411016	0.687442	0.309008	0.563836	0.211506	0.453503	0.332222
cg23944572	5	154101659	LARP1	Body	6	0.927848	0.153235	1.40355e-09	0.96353	0.11184	6.97819e-18	0.124615	0.785959	0.281844	1.24726	0.198235	0.693408	0.432065	1.40651	0.332349	0.875267	0.232711	0.308547	0.332668
cg13357714	5	155807613	SGCD;SGCD;SGCD	Body;Body;Body	6	0.802489	0.134487	2.41596e-09	0.802489	0.134487	2.41596e-09	0.689419	0.564895	0.333752	1.02461	0.245577	0.303533	0.501011	0.659693	0.405347	0.964679	0.260389	0.58152	0.451225
cg26876077	5	159347295	ADRA1B	Body	6	0.62164	0.104108	2.35634e-09	0.62164	0.104108	2.35634e-09	0.574135	0.222175	0.287359	0.754986	0.16974	0.443847	0.360519	0.871111	0.352839	0.696421	0.220463	0.406757	0.330675
cg01119875	5	159737324	CCNJL	Body	6	0.689092	0.120221	9.93167e-09	0.710068	0.0987064	6.30401e-13	0.221847	0.474425	0.250665	0.891351	0.17651	0.361637	0.368529	1.05381	0.294353	0.805967	0.207849	0.25756	0.282007
cg14653988	5	167171284	ODZ2	Body	6	0.801009	0.144555	3.00428e-08	0.801009	0.144555	3.00428e-08	0.529221	0.589311	0.373037	0.820119	0.247544	1.70919	0.487427	0.693902	0.489428	0.663071	0.290165	0.671971	0.494505
cg07129392	5	167729645	WWC1;WWC1;WWC1	Body;Body;Body	6	0.985715	0.182828	6.98742e-08	1.02225	0.147754	4.56264e-12	0.213887	0.709092	0.374032	1.4836	0.258553	0.76899	0.559596	1.3979	0.461479	0.765476	0.302603	0.446682	0.45226
cg17527764	5	170188384			6	0.697894	0.122189	1.11919e-08	0.697894	0.122189	1.11919e-08	0.601519	0.985711	0.29694	0.81595	0.22825	1.00365	0.407093	0.533915	0.324669	0.417059	0.262203	0.425842	0.396011
cg04731624	5	171067585			6	0.622543	0.112411	3.05745e-08	0.622543	0.112411	3.05745e-08	0.58447	1.07072	0.310779	0.605282	0.192109	0.502033	0.378354	0.58788	0.39622	0.668409	0.234775	0.235699	0.313262
cg12502751	5	171726404			6	0.69106	0.122042	1.49218e-08	0.69106	0.122042	1.49218e-08	0.466833	0.449729	0.274241	0.9948	0.192459	0.618398	0.496247	0.403682	0.40402	0.556784	0.257154	0.102029	0.806668
cg25349472	5	172717714			6	1.04755	0.182057	8.71767e-09	1.03704	0.159961	8.98731e-11	0.288084	1.18989	0.368869	0.937171	0.29401	2.00545	0.525577	1.24123	0.455088	0.783049	0.334196	0.245528	0.601796
cg24711224	5	176561865	NSD1;NSD1	5'UTR;5'UTR	6	0.494166	0.0806605	8.98342e-10	0.494166	0.0806605	8.98342e-10	0.600281	0.336071	0.257215	0.673901	0.131352	0.567511	0.312127	0.414369	0.26751	0.316153	0.160883	0.449781	0.237333
cg11463271	5	176936892	DOK3;DOK3;DOK3	TSS200;5'UTR;5'UTR	6	-0.780449	0.129743	1.7948e-09	-0.780449	0.129743	1.7948e-09	0.605404	-0.385839	0.383176	-0.879624	0.206316	-0.717981	0.493473	-1.2148	0.435683	-0.862465	0.272708	-0.338425	0.398983
cg04151449	5	177409992			6	0.887145	0.157822	1.89654e-08	0.933356	0.114619	3.85334e-16	0.132212	0.728207	0.302205	1.22038	0.19204	1.24844	0.4357	1.00068	0.340607	0.81231	0.237186	0.0529967	0.395617
cg11264947	5	177980944	COL23A1	Body	6	0.566901	0.0994407	1.19179e-08	0.566901	0.0994407	1.19179e-08	0.916791	0.632745	0.293523	0.684507	0.164561	0.492791	0.37387	0.407907	0.307276	0.551645	0.203661	0.331762	0.30515
cg09046370	5	178670670	ADAMTS2;ADAMTS2	Body;Body	6	0.790031	0.147403	8.33713e-08	0.790031	0.147403	8.33713e-08	0.59646	1.00837	0.35903	1.02351	0.259874	0.873119	0.464702	0.671344	0.431774	0.55781	0.32027	0.0808091	0.518783
cg03369432	5	179442399	MIR340;RNF130	TSS200;Body	6	0.634696	0.117672	6.9001e-08	0.634696	0.117672	6.9001e-08	0.880957	0.314541	0.304985	0.747075	0.204325	0.791105	0.407565	0.631317	0.335875	0.703082	0.267273	0.505082	0.340364
cg00608540	5	180627973	TRIM7;TRIM7;TRIM7;TRIM7;TRIM7	TSS200;Body;5'UTR;5'UTR;5'UTR	6	0.833552	0.131972	2.68219e-10	0.827004	0.120209	5.99656e-12	0.334696	1.00249	0.332951	0.747605	0.20233	0.168247	0.459319	1.56957	0.419641	0.76117	0.239198	0.879533	0.356711
cg17711521	6	225824			6	0.919099	0.152401	1.63162e-09	0.919099	0.152401	1.63162e-09	0.646462	1.56367	0.464524	1.00572	0.264449	0.813813	0.488642	0.672424	0.49185	0.618209	0.304934	1.01241	0.445209
cg08800670	6	436684			6	0.605851	0.105851	1.04281e-08	0.605851	0.105851	1.04281e-08	0.752322	0.485877	0.295022	0.780875	0.182185	0.828934	0.407202	0.667828	0.29176	0.426099	0.214301	0.351605	0.351811
cg01963618	6	1102332	LOC285768;LOC285768	TSS1500;TSS1500	6	0.927494	0.106528	3.13194e-18	0.927494	0.106528	3.13194e-18	0.899809	0.844965	0.27593	1.11785	0.193842	0.789294	0.387779	0.754442	0.302551	0.866054	0.204184	0.971686	0.383167
cg20872809	6	1481524			6	0.774963	0.124523	4.86409e-10	0.774963	0.124523	4.86409e-10	0.650974	0.795259	0.322665	1.06538	0.220509	0.393425	0.46377	0.738397	0.348431	0.633639	0.262382	0.479692	0.380473
cg15373880	6	3783345			6	0.701799	0.112559	4.51947e-10	0.709477	0.105821	2.02059e-11	0.357004	0.194273	0.317065	0.946516	0.188534	1.02267	0.385689	0.528545	0.290079	0.714896	0.214891	0.561985	0.302072
cg23985641	6	3848218	FAM50B	TSS1500	6	1.05103	0.192335	4.63952e-08	1.05692	0.14281	1.3527e-13	0.132282	0.801339	0.334659	1.33444	0.25753	1.48698	0.511879	1.6794	0.405468	0.631524	0.313721	0.451268	0.448735
cg02193425	6	3848280	FAM50B	TSS1500	6	0.805407	0.1404	9.66498e-09	0.81885	0.112504	3.37707e-13	0.193399	0.409136	0.244107	1.20698	0.214464	0.92518	0.360139	0.969696	0.3004	0.688864	0.249915	0.471599	0.419533
cg08815340	6	5026435			6	-0.911301	0.115702	3.37337e-15	-0.911301	0.115702	3.37337e-15	0.425311	-0.841949	0.310664	-1.11318	0.183242	-0.739572	0.458515	-1.25603	0.350607	-0.621404	0.257642	-0.469754	0.389265
cg09326832	6	7243643	RREB1;RREB1;RREB1;RREB1	Body;Body;Body;Body	6	-0.965056	0.14907	9.5538e-11	-0.965056	0.14907	9.5538e-11	0.577131	-1.09656	0.406885	-1.24381	0.271123	-0.514162	0.516682	-1.14686	0.424079	-0.896469	0.320996	-0.454003	0.396992
cg10512535	6	7989184	MGC26597	Body	6	0.707288	0.123763	1.09809e-08	0.707288	0.123763	1.09809e-08	0.422374	0.741149	0.288992	0.626087	0.225308	1.29139	0.471471	0.821462	0.360816	0.326649	0.268618	1.09873	0.363368
cg20510285	6	11263797	NEDD9	Body	6	0.539257	0.0956796	1.73969e-08	0.539257	0.0956796	1.73969e-08	0.711495	0.504305	0.241103	0.551028	0.167625	0.762878	0.372379	0.292378	0.277524	0.474764	0.187993	0.991963	0.354616
cg08015382	6	12365899			6	0.775906	0.124228	4.21535e-10	0.778335	0.120218	9.52073e-11	0.385258	0.606217	0.302725	0.943616	0.216061	1.13211	0.431391	0.988546	0.372213	0.76419	0.240455	0.084757	0.378705
cg08324157	6	23455043			6	0.759981	0.138936	4.50049e-08	0.76762	0.131666	5.54089e-09	0.369832	0.810757	0.356657	1.14719	0.226606	0.853669	0.490086	0.509617	0.419993	0.463806	0.252946	0.383276	0.452393
cg00339769	6	24489855	GPLD1;GPLD1	TSS200;TSS200	6	0.626708	0.100825	5.10603e-10	0.626708	0.100825	5.10603e-10	0.888515	0.496375	0.2791	0.52045	0.171512	0.518647	0.388554	0.905066	0.343722	0.732299	0.190787	0.709593	0.333742
cg14023451	6	24489887	GPLD1;GPLD1	TSS200;TSS200	6	0.855641	0.123637	4.49787e-12	0.855641	0.123637	4.49787e-12	0.837787	0.860394	0.325024	0.769239	0.213073	0.455473	0.446755	0.727357	0.454243	1.09988	0.241669	0.899246	0.37939
cg24285903	6	25187166			6	0.966324	0.170803	1.53571e-08	1.00714	0.117766	1.20921e-17	0.0869023	0.953602	0.277543	1.38445	0.204478	1.32969	0.466238	1.08718	0.359711	0.708145	0.267326	0.303846	0.335512
cg00758854	6	29576422	GABBR1;GABBR1;GABBR1	Body;Body;Body	6	0.802562	0.107889	1.01616e-13	0.802562	0.107889	1.01616e-13	0.49483	0.437242	0.313773	0.848802	0.192397	0.585414	0.365499	1.32116	0.321942	0.768809	0.212857	0.784557	0.323869
cg04560098	6	30127760	TRIM10;TRIM10	Body;Body	6	0.989291	0.171304	7.69209e-09	1.06117	0.1073	4.61268e-23	0.0401647	0.761568	0.247948	1.45395	0.192738	0.908135	0.394666	1.1692	0.328462	1.12071	0.225616	0.234816	0.346349
cg10526841	6	30182507	TRIM26	TSS1500	6	0.768219	0.130087	3.51733e-09	0.768219	0.130087	3.51733e-09	0.935995	0.973747	0.384717	0.833701	0.219067	0.372574	0.516112	0.869696	0.407032	0.642478	0.247068	0.801936	0.433288
cg09637172	6	31545252	TNF	Body	5	1.05425	0.158939	3.28811e-11	1.07528	0.141491	2.96996e-14	0.312624	0.729915	0.371788	1.32881	0.220987	0.4968	0.484938	1.39312	0.387563	0.867927	0.297102	NA	NA
cg14868222	6	31548340	LTB;LTB	3'UTR;3'UTR	6	0.831129	0.132856	3.95261e-10	0.831129	0.132856	3.95261e-10	0.743965	0.684672	0.339199	1.15243	0.247086	0.7411	0.434976	0.60775	0.363647	0.794059	0.261932	0.522455	0.490208
cg02550722	6	32048679	TNXB	Body	6	0.745927	0.108171	5.35684e-12	0.745927	0.108171	5.35684e-12	0.495166	0.799846	0.293583	0.95182	0.198279	0.511758	0.378431	0.932638	0.331984	0.692818	0.205403	0.207883	0.339693
cg16609995	6	32159036	PBX2;GPSM3	TSS1500;3'UTR	6	0.606191	0.112934	7.97721e-08	0.606191	0.112934	7.97721e-08	0.473509	0.32969	0.309263	0.875309	0.205525	0.528358	0.452548	0.751271	0.330362	0.606438	0.227177	0.197674	0.303526
cg18244508	6	32172871	NOTCH4	Body	6	0.924569	0.159423	6.65216e-09	0.922635	0.12738	4.38234e-13	0.213311	0.943597	0.349972	1.10244	0.210344	1.79098	0.500843	1.07403	0.451738	0.553276	0.272517	0.515592	0.342739
cg20666438	6	32849783			5	-0.523674	0.0918208	1.17566e-08	-0.523674	0.0918208	1.17566e-08	0.689447	-0.456431	0.199645	-0.639427	0.157971	-0.306965	0.342002	-0.698838	0.237127	-0.368263	0.192046	NA	NA
cg13106156	6	33140934	COL11A2;COL11A2;COL11A2	Body;Body;Body	6	0.607741	0.102403	2.94204e-09	0.609329	0.0994796	9.05866e-10	0.392621	0.541246	0.281796	0.791504	0.164729	0.515721	0.41002	1.04056	0.337932	0.361334	0.196264	0.368231	0.302357
cg20980653	6	33143760	COL11A2;COL11A2;COL11A2	Body;Body;Body	6	0.950328	0.146641	9.13187e-11	0.950328	0.146641	9.13187e-11	0.535715	1.01066	0.342637	1.22602	0.242671	1.31302	0.611225	0.647582	0.539797	0.689237	0.295452	0.329433	0.539107
cg04651583	6	33870691			6	0.841735	0.152829	3.63582e-08	0.841735	0.152829	3.63582e-08	0.8799	1.1458	0.397719	0.631546	0.276345	0.536295	0.548588	1.0641	0.427651	0.88419	0.310741	0.886299	0.485038
cg23372795	6	39284679	KCNK16;KCNK16;KCNK16;KCNK16	Body;Body;Body;Body	5	1.20742	0.134822	3.37605e-19	1.20742	0.134822	3.37605e-19	0.49071	1.08025	0.306634	1.52381	0.226783	1.2352	0.452534	1.05237	0.392231	0.917652	0.27164	NA	NA
cg06543101	6	39290342	KCNK16;KCNK16;KCNK16;KCNK16	TSS200;TSS200;TSS200;TSS200	6	0.751533	0.0934614	8.90311e-16	0.754807	0.0914813	1.57143e-16	0.397894	0.488569	0.256324	1.0205	0.153269	0.6087	0.339984	0.734672	0.283936	0.588594	0.185067	0.676959	0.295532
cg22653878	6	40698276			6	0.820966	0.11744	2.73842e-12	0.820966	0.11744	2.73842e-12	0.569193	0.921269	0.286231	1.0265	0.19967	1.04467	0.475575	0.730111	0.377125	0.631186	0.244259	0.314218	0.377874
cg11915672	6	41103849	LOC221442	Body	6	0.812806	0.133803	1.24252e-09	0.836832	0.0980715	1.42746e-17	0.128785	0.629959	0.26908	1.0593	0.171394	0.350876	0.35506	1.39156	0.313903	0.715504	0.203145	0.57963	0.269135
cg25960769	6	41169811	TREML2	TSS1500	6	-0.90595	0.142088	1.81809e-10	-0.90595	0.142088	1.81809e-10	0.679997	-0.868028	0.374266	-1.05373	0.236427	-0.739097	0.591721	-0.815693	0.380017	-1.08848	0.311521	-0.192377	0.475769
cg26325867	6	41398693			6	0.740402	0.107069	4.67241e-12	0.740402	0.107069	4.67241e-12	0.904635	0.611647	0.282234	0.842795	0.188036	0.349406	0.502043	0.569274	0.309736	0.82082	0.206067	0.759526	0.343921
cg05689413	6	41885417	MED20	Body	6	0.897025	0.153407	4.99488e-09	0.897025	0.153407	4.99488e-09	0.624622	0.926285	0.421131	1.14082	0.248941	1.20543	0.662433	0.928647	0.528424	0.727012	0.324413	0.280888	0.432127
cg20927649	6	42123259	GUCA1A;GUCA1A	5'UTR;1stExon	6	0.801049	0.116965	7.45685e-12	0.807565	0.108284	8.79691e-14	0.339222	0.917884	0.308464	0.889414	0.197913	0.386128	0.3516	1.10197	0.324634	0.941069	0.218595	0.302158	0.305155
cg18336453	6	43082296	PTK7;PTK7;PTK7;PTK7	Body;Body;Body;Body	6	0.782768	0.128288	1.0498e-09	0.787838	0.120122	5.4298e-11	0.356437	1.17397	0.324712	0.778537	0.216494	0.894268	0.473113	0.347967	0.402334	0.952987	0.227019	0.263079	0.344319
cg13675015	6	43217925	TTBK1	Body	6	0.607271	0.109071	2.58198e-08	0.607271	0.109071	2.58198e-08	0.95023	0.696589	0.287025	0.661573	0.210378	0.314625	0.383467	0.772225	0.334528	0.582482	0.209555	0.493517	0.304055
cg15611112	6	44126075	CAPN11	TSS1500	6	0.534027	0.0960703	2.71784e-08	0.534027	0.0960703	2.71784e-08	0.921805	0.422371	0.247069	0.65855	0.166134	0.575023	0.366888	0.626097	0.298412	0.385747	0.202511	0.502092	0.280689
cg15169900	6	44698413			6	0.751585	0.113525	3.5816e-11	0.751585	0.113525	3.5816e-11	0.507369	0.671572	0.288295	0.8159	0.202249	0.531139	0.389756	1.26929	0.330118	0.721808	0.245799	0.363495	0.337053
cg22768222	6	45383690	RUNX2;RUNX2	Body;Body	6	0.95085	0.157059	1.41206e-09	0.95085	0.157059	1.41206e-09	0.93868	0.904174	0.426387	1.14172	0.268105	0.762953	0.516255	0.501529	0.607931	0.959621	0.319983	0.835879	0.451649
cg06665622	6	46293571	RCAN2	TSS200	6	0.698637	0.127297	4.0595e-08	0.717771	0.112789	1.96785e-10	0.300731	0.941251	0.304214	0.987686	0.197644	0.409844	0.463575	0.414486	0.349479	0.710582	0.235575	0.252363	0.296923
cg17759095	6	56755566	DST	Body	6	1.04402	0.183003	1.16382e-08	1.04889	0.169493	6.07934e-10	0.349161	1.06762	0.432942	1.21007	0.283737	0.900467	0.798953	1.82438	0.488059	0.715877	0.358017	0.324021	0.535563
cg00240178	6	74232108	EEF1A1	TSS1500	6	0.827912	0.1456	1.2989e-08	0.830278	0.143689	7.54551e-09	0.403479	0.545213	0.357163	1.08103	0.249863	0.678947	0.471723	1.12748	0.429561	0.928527	0.319311	0.0734003	0.453762
cg16284238	6	87196595			6	0.728543	0.132397	3.74004e-08	0.728543	0.132397	3.74004e-08	0.580268	0.645531	0.310025	0.872546	0.239348	1.19513	0.459318	0.18324	0.397103	0.80472	0.279058	0.466118	0.435796
cg15888097	6	87646462	HTR1E	TSS1500	6	0.774127	0.113444	8.86252e-12	0.774127	0.113444	8.86252e-12	0.937721	0.553821	0.301564	0.784656	0.201065	0.65074	0.409902	0.812796	0.344722	0.942643	0.225085	0.678123	0.35656
cg06916740	6	91188911			6	0.559725	0.0980663	1.14569e-08	0.559725	0.0980663	1.14569e-08	0.548139	0.262273	0.252176	0.56451	0.175414	0.604689	0.366367	0.956687	0.253055	0.514248	0.213635	0.465523	0.304552
cg01758512	6	96463902	FUT9;FUT9	5'UTR;1stExon	6	-0.956298	0.14862	1.23847e-10	-0.956298	0.14862	1.23847e-10	0.623274	-0.542944	0.387839	-0.898757	0.24214	-1.09379	0.466716	-1.56337	0.477901	-1.10275	0.316774	-0.569528	0.615993
cg25351606	6	100917427			6	-1.14921	0.184344	4.54488e-10	-1.14921	0.184344	4.54488e-10	0.621449	-1.07237	0.522978	-1.39755	0.315559	-0.892868	0.569768	-1.78527	0.550662	-0.753833	0.380704	-0.825562	0.638848
cg03942932	6	106441441			6	-0.909916	0.159174	1.08757e-08	-0.909916	0.159174	1.08757e-08	0.5483	-0.650541	0.426232	-0.925739	0.262299	-1.27244	0.684181	-1.45558	0.411513	-0.84921	0.354375	-0.233876	0.540326
cg08336300	6	109331442	SESN1	Body	5	-0.90937	0.142149	1.58147e-10	-0.917082	0.134836	1.03573e-11	0.365216	-0.399947	0.347113	-1.09271	0.212945	-0.437091	0.529256	-1.19242	0.358038	-0.915924	0.274413	NA	NA
cg20706468	6	111352500			6	0.648704	0.111797	6.53258e-09	0.653775	0.10797	1.40271e-09	0.384176	0.577356	0.247763	0.918277	0.189661	0.899029	0.428565	0.333768	0.372467	0.628604	0.229815	0.19259	0.314578
cg27158519	6	113580203			6	0.867026	0.144821	2.13907e-09	0.880223	0.128599	7.66398e-12	0.302444	1.04142	0.316953	1.24075	0.228968	0.979566	0.460551	0.441549	0.390066	0.524376	0.260765	0.727176	0.428523
cg04414860	6	116575894	TSPYL4	TSS1500	6	-0.917478	0.148498	6.47684e-10	-0.917478	0.148498	6.47684e-10	0.576858	-1.04333	0.393403	-0.790445	0.246404	-0.784914	0.548134	-1.57453	0.432744	-0.955166	0.325537	-0.420209	0.481599
cg18828861	6	116576566	TSPYL4	TSS1500	5	-1.30923	0.227765	9.022e-09	-1.30923	0.227765	9.022e-09	0.680551	-1.93936	0.534343	-1.03835	0.393306	-1.01597	0.728502	-1.61058	0.662797	-1.19479	0.4407	NA	NA
cg15366353	6	116691382	DSE;DSE	TSS1500;5'UTR	6	-0.678044	0.112206	1.51431e-09	-0.678044	0.112206	1.51431e-09	0.944665	-0.646838	0.336238	-0.793084	0.171962	-0.787295	0.386397	-0.534527	0.386573	-0.510012	0.238698	-0.603078	0.414382
cg03309350	6	135238102			6	0.892869	0.138891	1.28829e-10	0.896346	0.130656	6.86889e-12	0.357741	1.18537	0.338807	1.11641	0.228627	0.853477	0.387491	1.11743	0.394049	0.434927	0.276786	0.494097	0.467126
cg11472725	6	138938931			6	0.727983	0.115667	3.0986e-10	0.727983	0.115667	3.0986e-10	0.419101	0.66588	0.275341	0.93228	0.19549	0.751499	0.43311	0.976767	0.349882	0.580247	0.255137	0.0514213	0.391473
cg00631221	6	139307985	REPS1;REPS1	Body;Body	6	-0.513649	0.0750982	7.93577e-12	-0.513649	0.0750982	7.93577e-12	0.863971	-0.427821	0.204752	-0.471956	0.120776	-0.253165	0.334353	-0.518444	0.2065	-0.63433	0.170137	-0.678102	0.235944
cg13265740	6	139349120	C6orf115	TSS1500	6	-0.684821	0.12603	5.51686e-08	-0.684821	0.12603	5.51686e-08	0.545458	-0.464371	0.352438	-0.683024	0.199313	-0.256393	0.482722	-0.99873	0.417858	-1.00512	0.273726	-0.305823	0.396225
cg15785898	6	144608500			6	-1.08832	0.161327	1.51955e-11	-1.08832	0.161327	1.51955e-11	0.769944	-0.529324	0.455628	-1.26367	0.262744	-1.32062	0.690596	-1.13986	0.487544	-1.1915	0.355092	-0.807944	0.452433
cg22724228	6	154826964	CNKSR3	Body	6	0.772804	0.123802	4.31344e-10	0.772804	0.123802	4.31344e-10	0.800286	0.766062	0.284104	0.861733	0.201727	0.430275	0.585512	0.626954	0.383075	0.951505	0.272865	0.282697	0.441985
cg24931561	6	157745382	C6orf35	TSS200	6	-0.494271	0.0917449	7.14636e-08	-0.494271	0.0917449	7.14636e-08	0.76954	-0.249156	0.282908	-0.634823	0.139574	-0.284224	0.334848	-0.536983	0.293959	-0.372744	0.201881	-0.515236	0.316996
cg02571055	6	158896790	TULP4;TULP4	Body;Body	6	1.05856	0.151768	3.0622e-12	1.06181	0.142586	9.5627e-14	0.354248	1.11342	0.349355	1.41557	0.265748	0.711836	0.432454	1.47457	0.429479	0.664073	0.286439	0.816514	0.507896
cg18403193	6	166349977	C6orf176	Body	6	0.96602	0.1652	4.98756e-09	0.96451	0.150517	1.47471e-10	0.313709	0.93972	0.353793	0.81919	0.287716	0.965021	0.441021	1.48367	0.411054	1.34097	0.361605	0.218476	0.431826
cg20181209	6	166859733	RPS6KA2;RPS6KA2	Body;Body	6	0.754247	0.128255	4.0813e-09	0.754247	0.128255	4.0813e-09	0.422714	0.687003	0.355881	1.00637	0.233302	0.6893	0.393443	0.98141	0.375717	0.730783	0.271359	0.082403	0.36759
cg17501210	6	166970252	RPS6KA2;RPS6KA2	Body;Body	6	-1.26713	0.199066	1.94818e-10	-1.26713	0.199066	1.94818e-10	0.467757	-1.83034	0.453779	-1.32498	0.364265	-0.398872	0.613688	-1.58517	0.809541	-1.27967	0.398195	-0.65975	0.651697
cg13655385	6	168121752			6	0.625639	0.113327	3.37763e-08	0.625639	0.113327	3.37763e-08	0.950137	0.493542	0.285478	0.734124	0.189652	0.704071	0.382526	0.606956	0.361063	0.613298	0.22982	0.268521	0.479336
cg08638960	6	168641710			5	0.838937	0.114554	2.41624e-13	0.838937	0.114554	2.41624e-13	0.613856	0.588707	0.296248	0.972794	0.185338	0.337029	0.455453	0.778552	0.316093	0.933737	0.218906	NA	NA
cg16577947	6	168977235	SMOC2;SMOC2	Body;Body	6	0.800524	0.133262	1.88807e-09	0.831187	0.111636	9.65618e-14	0.268502	0.365976	0.306927	0.945809	0.190963	0.696499	0.412321	1.03451	0.437029	1.04563	0.200834	0.22827	0.398654
cg04450052	6	170525426			5	0.967006	0.172071	1.91161e-08	0.967006	0.172071	1.91161e-08	0.889253	1.01554	0.475926	1.07607	0.283709	1.46925	0.699994	0.82662	0.490858	0.779776	0.305078	NA	NA
cg26263239	6	170564839	LOC154449	Body	6	0.738656	0.10864	1.0528e-11	0.738656	0.10864	1.0528e-11	0.431868	0.69828	0.260405	0.775837	0.199583	0.88364	0.377786	1.0949	0.313928	0.71536	0.214137	-0.0157248	0.41124
cg22408108	7	3215287			5	0.884433	0.163273	6.06436e-08	0.92851	0.119944	9.84767e-15	0.151825	0.63404	0.288606	1.2512	0.191139	0.501474	0.389182	1.17681	0.3669	0.660064	0.249214	NA	NA
cg06506470	7	4030653	SDK1	Body	6	0.778435	0.126765	8.21209e-10	0.778435	0.126765	8.21209e-10	0.416871	0.516352	0.333089	0.891369	0.223053	0.211195	0.464437	1.13045	0.390838	0.998633	0.260769	0.388275	0.37192
cg17552471	7	4678661			6	0.83331	0.0973256	1.10845e-17	0.83331	0.0973256	1.10845e-17	0.449564	0.770739	0.273792	0.955121	0.16826	0.526956	0.386893	1.18676	0.281159	0.801492	0.204627	0.458585	0.270202
cg10950593	7	6212775	CYTH3	Body	6	0.775536	0.138785	2.29635e-08	0.785886	0.129265	1.20462e-09	0.349765	0.348789	0.390246	0.844417	0.224236	0.450904	0.472002	0.895866	0.389035	1.19539	0.266557	0.386893	0.348753
cg06488150	7	6476003	DAGLB;DAGLB	Body;Body	6	-0.904249	0.151176	2.21183e-09	-0.910514	0.147369	6.47201e-10	0.395786	-0.445395	0.391747	-1.25901	0.237848	-0.934908	0.680702	-1.09892	0.442924	-0.712027	0.311844	-0.42343	0.481438
cg08313420	7	6476110	DAGLB;DAGLB	Body;Body	6	-0.793387	0.127936	5.59443e-10	-0.807048	0.116366	4.05014e-12	0.333785	-0.331163	0.313733	-1.02608	0.192581	-1.0345	0.565845	-1.01005	0.331985	-0.805294	0.246662	-0.362964	0.351495
cg26804423	7	8201134	ICA1;ICA1;ICA1	Body;Body;Body	6	0.822276	0.127571	1.15109e-10	0.822932	0.125728	5.93666e-11	0.402198	0.703854	0.339181	0.749755	0.224678	0.111475	0.409246	1.13944	0.407686	1.10581	0.255423	0.889085	0.366532
cg13495373	7	28474813	CREB5;CREB5;CREB5	TSS1500;5'UTR;Body	6	0.643067	0.102059	2.95836e-10	0.643067	0.102059	2.95836e-10	0.419827	0.952193	0.281303	0.629957	0.174008	0.729244	0.305326	0.999153	0.306153	0.356266	0.223999	0.367905	0.333027
cg06465175	7	29844768			6	0.746137	0.119867	4.82451e-10	0.766446	0.106446	6.00734e-13	0.31885	0.71242	0.270094	0.925215	0.179101	-0.221063	0.514071	0.785446	0.280876	0.828007	0.207304	0.177545	0.523898
cg14370520	7	30891837	FAM188B	Body	6	0.764037	0.113778	1.87858e-11	0.764037	0.113778	1.87858e-11	0.989021	0.787969	0.29118	0.765787	0.204425	0.745198	0.385081	0.523601	0.362092	0.801703	0.234115	0.870633	0.335052
cg03392965	7	30931622	FAM188B	3'UTR	6	0.578848	0.106987	6.28593e-08	0.578848	0.106987	6.28593e-08	0.571457	0.298293	0.299755	0.863757	0.191974	0.50423	0.411323	0.402873	0.346979	0.56238	0.206155	0.374708	0.296747
cg17284553	7	30973285			6	0.601317	0.0897669	2.10353e-11	0.601317	0.0897669	2.10353e-11	0.569715	0.741485	0.236572	0.626656	0.147618	0.982232	0.365182	0.391201	0.276706	0.61601	0.182763	0.172672	0.318734
cg11828203	7	31014714	GHRHR;GHRHR	Body;Body	6	0.604388	0.0904205	2.32215e-11	0.604388	0.0904205	2.32215e-11	0.517082	0.516731	0.267267	0.568955	0.150038	0.0669868	0.47983	1.01582	0.261284	0.635666	0.174998	0.448179	0.285776
cg12127159	7	33809972			5	0.868935	0.113618	2.04387e-14	0.868935	0.113618	2.04387e-14	0.577784	0.820007	0.283007	1.07871	0.184355	0.477471	0.368669	0.665507	0.320331	0.831075	0.232792	NA	NA
cg09807875	7	34136112	BMPER	Body	6	0.725686	0.132376	4.20541e-08	0.725686	0.132376	4.20541e-08	0.995343	0.795566	0.342662	0.826652	0.239527	0.633866	0.475294	0.644893	0.391946	0.657274	0.270999	0.650914	0.390214
cg23448390	7	34889338	NPSR1;NPSR1	3'UTR;Body	6	0.740493	0.110439	2.01429e-11	0.740493	0.110439	2.01429e-11	0.775863	0.64051	0.280147	0.858815	0.195237	0.949583	0.430995	0.483762	0.309722	0.847711	0.222466	0.391011	0.377998
cg24929847	7	34911779	NPSR1	Body	6	0.975281	0.123121	2.35051e-15	0.975281	0.123121	2.35051e-15	0.475821	1.13764	0.308971	0.982562	0.214352	0.705367	0.515362	1.08426	0.394091	1.15596	0.241813	0.253702	0.394586
cg16328023	7	36382071	KIAA0895;KIAA0895	Body;Body	5	0.815501	0.150587	6.11257e-08	0.815501	0.150587	6.11257e-08	0.561273	1.01631	0.373975	0.787531	0.249226	0.363683	0.463686	1.29513	0.404783	0.636062	0.314743	NA	NA
cg24237862	7	37026842	ELMO1;ELMO1	Body;TSS1500	5	1.04591	0.16	6.27909e-11	1.04591	0.16	6.27909e-11	0.640316	1.04625	0.447851	1.22749	0.24908	0.710253	0.575707	1.44331	0.513094	0.738513	0.299576	NA	NA
cg17389988	7	40740924	C7orf10	Body	6	0.968796	0.156297	5.70317e-10	0.968796	0.156297	5.70317e-10	0.508467	1.64007	0.44517	1.07688	0.266082	1.14242	0.536091	0.782897	0.52731	0.667262	0.327142	0.588648	0.432536
cg13924998	7	41531155			6	0.72295	0.128578	1.88022e-08	0.72295	0.128578	1.88022e-08	0.53837	0.685928	0.35189	0.858637	0.224649	0.04556	0.57794	0.416585	0.415032	0.584411	0.255196	1.14274	0.344153
cg04275692	7	45610627			6	1.02381	0.156768	6.5435e-11	1.03659	0.13759	4.92359e-14	0.29381	1.50245	0.353922	1.26938	0.239693	1.21734	0.58496	0.680295	0.430856	0.826192	0.28297	0.471189	0.388174
cg15209604	7	46018431			6	0.668164	0.115917	8.20645e-09	0.668164	0.115917	8.20645e-09	0.485554	0.417343	0.284307	0.775843	0.206367	0.0752397	0.428989	1.05777	0.334008	0.727929	0.241209	0.564648	0.378367
cg03609427	7	48068758	SUNC1;SUNC1	TSS200;TSS200	6	0.731122	0.108571	1.65015e-11	0.731122	0.108571	1.65015e-11	0.483919	0.876269	0.289394	0.794157	0.194773	0.225111	0.350814	0.96712	0.331789	0.861302	0.236732	0.404502	0.295129
cg13051970	7	50628968	DDC;DDC	5'UTR;TSS1500	6	0.937662	0.133008	1.79366e-12	0.934377	0.105488	8.17064e-19	0.196354	0.996092	0.281632	1.07664	0.189052	1.12428	0.46437	1.43159	0.308372	0.702837	0.210708	0.447144	0.293589
cg27528351	7	50629067	DDC;DDC	5'UTR;TSS1500	6	0.941347	0.147268	1.63652e-10	0.941347	0.147268	1.63652e-10	0.845088	1.22245	0.391045	0.886244	0.261712	0.846102	0.530503	1.37683	0.451163	0.786724	0.278628	0.708586	0.525429
cg01220564	7	50633119	DDC;DDC	5'UTR;1stExon	6	0.816189	0.133086	8.63418e-10	0.818562	0.121139	1.40671e-11	0.333663	0.777588	0.320713	0.855795	0.209588	0.306847	0.461569	1.51336	0.371117	0.767558	0.232024	0.40032	0.441609
cg22203237	7	68983823			5	1.47575	0.15458	1.33779e-21	1.47575	0.15458	1.33779e-21	0.496229	1.42789	0.398452	1.48265	0.242416	1.91505	0.509009	1.9743	0.463629	1.0935	0.315877	NA	NA
cg14826417	7	73244073	CLDN4	TSS1500	6	1.0002	0.176336	1.41021e-08	1.08774	0.100696	3.35985e-27	0.016692	1.0026	0.255082	1.47305	0.181285	0.575787	0.430966	1.20403	0.309668	1.1221	0.201509	0.303148	0.284135
cg14989226	7	75897850	SRRM3	Body	6	0.862729	0.150484	9.865e-09	0.862729	0.150484	9.865e-09	0.469615	1.43046	0.437652	0.652121	0.25229	0.454181	0.556542	1.09408	0.477742	1.07808	0.29263	0.389405	0.503818
cg13616508	7	75957123	YWHAG	3'UTR	6	-0.653846	0.112746	6.65915e-09	-0.653846	0.112746	6.65915e-09	0.466799	-0.647175	0.347251	-0.704914	0.184412	-0.329268	0.525927	-1.15817	0.318102	-0.576938	0.239754	-0.264907	0.315034
cg03887471	7	77168021	PTPN12;PTPN12;PTPN12	5'UTR;5'UTR;Body	6	-0.538769	0.0996143	6.35358e-08	-0.538769	0.0996143	6.35358e-08	0.842047	-0.578314	0.276852	-0.590502	0.16147	-0.699178	0.453751	-0.279962	0.268224	-0.640366	0.205518	-0.238104	0.379538
cg16407998	7	77770262	MAGI2	Body	6	0.834369	0.111825	8.56176e-14	0.843161	0.10672	2.77332e-15	0.371432	0.892788	0.273321	1.10058	0.188335	0.274626	0.416114	0.594998	0.298574	0.898156	0.227362	0.547994	0.318028
cg12916055	7	96285540			6	0.599157	0.105981	1.57272e-08	0.604494	0.0949971	1.97472e-10	0.316102	0.549293	0.237281	0.574617	0.159519	-0.0663775	0.373595	0.794358	0.304982	0.894089	0.207696	0.46276	0.281128
cg02538169	7	100287481	GIGYF1	TSS1500	6	-0.565868	0.0985347	9.31105e-09	-0.57112	0.0861044	3.29208e-11	0.286005	-0.729132	0.22611	-0.645258	0.150619	-0.38218	0.329391	-0.739383	0.292711	-0.688167	0.188008	-0.122729	0.2129
cg07156484	7	100849501	PLOD3	3'UTR	6	0.654161	0.087189	6.24718e-14	0.654161	0.087189	6.24718e-14	0.836138	0.566615	0.267113	0.609724	0.148093	0.955941	0.287144	0.832625	0.248124	0.566886	0.16925	0.624234	0.339945
cg14055212	7	104445585	LHFPL3	Body	6	0.775463	0.140802	3.63992e-08	0.775463	0.140802	3.63992e-08	0.761202	0.684833	0.36834	1.03414	0.242891	0.41679	0.496997	0.689682	0.412212	0.762748	0.275566	0.247825	0.575663
cg18325389	7	116450458			6	0.672827	0.122851	4.33124e-08	0.672827	0.122851	4.33124e-08	0.934632	0.737002	0.345037	0.784313	0.203784	0.31726	0.474101	0.73291	0.376986	0.657181	0.275743	0.469501	0.330742
cg12976145	7	117502752	CTTNBP2	Body	5	0.850333	0.121998	3.16816e-12	0.850333	0.121998	3.16816e-12	0.694588	0.421148	0.328614	0.981556	0.19588	0.796299	0.428316	0.931931	0.360614	0.86216	0.231096	NA	NA
cg16626196	7	117528580			5	0.714131	0.109422	6.73832e-11	0.714131	0.109422	6.73832e-11	0.897981	0.836928	0.237737	0.729439	0.180982	0.809562	0.47479	0.769323	0.290665	0.518764	0.229273	NA	NA
cg24294950	7	126752911	GRM8;GRM8;GRM8	Body;Body;Body	6	0.782873	0.127989	9.55212e-10	0.782873	0.127989	9.55212e-10	0.660262	0.519865	0.327773	0.925562	0.221069	0.934213	0.474625	0.530928	0.413626	0.983945	0.260043	0.356637	0.401489
cg02538772	7	127699264	SND1	Body	5	0.608427	0.103486	4.11989e-09	0.608013	0.102506	3.00193e-09	0.398702	0.747069	0.2556	0.462594	0.166453	0.105854	0.381611	0.863028	0.299809	0.752749	0.196954	NA	NA
cg02433979	7	128824829			6	0.650242	0.118449	4.02737e-08	0.664428	0.0991375	2.05465e-11	0.248373	0.746832	0.231676	0.874191	0.17097	0.430792	0.396387	1.05823	0.355144	0.447901	0.220533	0.244937	0.26677
cg14761227	7	130021088	CPA1	Body	6	0.594358	0.101435	4.64326e-09	0.597019	0.0964599	6.0432e-10	0.367352	0.231763	0.250151	0.751465	0.168784	0.589975	0.298181	1.03961	0.315128	0.503831	0.21009	0.44799	0.283769
cg02491878	7	138482580	ATP6V0A4;TMEM213;ATP6V0A4	5'UTR;TSS200;5'UTR	6	1.08136	0.168344	1.33152e-10	1.08136	0.168344	1.33152e-10	0.909995	1.01075	0.434178	1.04859	0.299198	1.64657	0.551614	1.07858	0.498736	0.873909	0.352541	1.24434	0.537779
cg22537597	7	149530984	SSPO	3'UTR	6	0.688021	0.119083	7.5741e-09	0.701238	0.110319	2.06475e-10	0.359496	0.508216	0.342746	0.949966	0.17081	0.874882	0.499518	0.783258	0.319663	0.412356	0.22781	0.255775	0.397863
cg06961439	7	149570036	ATP6V0E2;ATP6V0E2;LOC401431	TSS200;TSS200;Body	6	-0.678839	0.124568	5.04969e-08	-0.678839	0.124568	5.04969e-08	0.936793	-0.847627	0.346055	-0.645448	0.201503	-0.748952	0.387748	-0.925858	0.459888	-0.459858	0.275529	-0.774741	0.380302
cg04642165	7	150063431			6	-0.815442	0.132614	7.79785e-10	-0.815442	0.132614	7.79785e-10	0.429316	-0.284392	0.383038	-0.971923	0.224777	-1.42633	0.483899	-0.845254	0.394237	-0.545446	0.29862	-0.905363	0.346374
cg16035633	7	150700728	NOS3;NOS3;NOS3;NOS3	3'UTR;3'UTR;Body;Body	6	0.644422	0.0996933	1.01944e-10	0.644422	0.0996933	1.01944e-10	0.443252	0.914398	0.254135	0.721339	0.166881	0.607401	0.41131	0.891898	0.311614	0.415082	0.209181	0.247791	0.313695
cg25788549	7	150786044	AGAP3;AGAP3	Body;Body	5	-1.02991	0.165074	4.40111e-10	-1.02991	0.165074	4.40111e-10	0.447552	-0.926375	0.398855	-1.15898	0.275337	-0.624402	0.533342	-1.72598	0.480719	-0.74861	0.326539	NA	NA
cg22620221	7	153584416	DPP6	TSS200	6	-0.839627	0.15444	5.43051e-08	-0.839627	0.15444	5.43051e-08	0.424511	-0.2598	0.391198	-0.96878	0.260431	-1.36342	0.411026	-1.07294	0.580324	-0.786897	0.340152	-0.373418	0.566474
cg27032232	7	153584609	DPP6;DPP6	1stExon;5'UTR	6	-1.0892	0.187477	6.25486e-09	-1.0892	0.187477	6.25486e-09	0.46179	-0.55052	0.472752	-1.51812	0.313254	-1.06383	0.659949	-0.444196	0.585137	-0.994678	0.388865	-1.39912	0.714907
cg07993586	7	157204960	DNAJB6	Body	6	0.993416	0.174679	1.2921e-08	1.03359	0.117032	1.03111e-18	0.0648083	1.2829	0.277802	1.4079	0.213671	0.707404	0.436613	1.25539	0.342055	0.566967	0.257568	0.540279	0.328202
cg10310310	7	157367150	PTPRN2;PTPRN2;MIR153-2;PTPRN2	Body;Body;TSS200;Body	6	0.718692	0.117476	9.48989e-10	0.729041	0.108988	2.24376e-11	0.337494	0.683139	0.256549	1.07168	0.209994	0.451992	0.304345	0.772532	0.297995	0.670207	0.233008	0.1319	0.413782
cg17701146	7	157387361	PTPRN2;PTPRN2;PTPRN2	Body;Body;Body	6	0.868845	0.142012	9.46995e-10	0.870643	0.136103	1.58538e-10	0.37409	0.954192	0.398565	0.946006	0.240101	0.840822	0.392264	1.40117	0.398652	0.837036	0.296409	0.125729	0.402625
cg08904151	7	157391259	PTPRN2;PTPRN2;PTPRN2	Body;Body;Body	6	0.578976	0.100405	8.09862e-09	0.591339	0.0931208	2.14984e-10	0.345977	0.392091	0.244191	0.803928	0.163807	0.233737	0.341413	0.635576	0.266622	0.672021	0.187198	0.151927	0.31466
cg06649856	7	158355003	PTPRN2;PTPRN2;PTPRN2	Body;Body;Body	6	0.985655	0.169287	5.80124e-09	0.979595	0.138778	1.68031e-12	0.228486	0.185516	0.358787	0.931108	0.254397	1.30893	0.488833	1.2588	0.394017	1.12999	0.262998	1.4125	0.525636
cg12797746	8	1110520			6	1.0382	0.125394	1.2365e-16	1.05826	0.112022	3.48955e-21	0.317372	0.993216	0.318976	1.24034	0.187412	0.613527	0.510069	1.1637	0.304608	1.13593	0.228571	0.342623	0.362097
cg13376199	8	1311063			6	1.01334	0.177918	1.22972e-08	1.01436	0.125301	5.70818e-16	0.102748	0.899793	0.372119	0.90654	0.220974	1.83904	0.502276	0.768759	0.365165	1.4374	0.252356	0.44396	0.336605
cg17124844	8	1624822	DLGAP2	Body	6	0.516276	0.0933824	3.22746e-08	0.516977	0.0921381	2.01286e-08	0.403642	0.38226	0.253222	0.549351	0.159139	0.171765	0.34515	0.912225	0.258901	0.594002	0.196408	0.20733	0.272406
cg27564715	8	1773758	ARHGEF10	5'UTR	6	0.487501	0.0898884	5.84752e-08	0.487501	0.0898884	5.84752e-08	0.674897	0.298699	0.209331	0.571687	0.15664	0.663582	0.430636	0.676505	0.262628	0.537061	0.192085	0.172529	0.275314
cg14839837	8	1834174	ARHGEF10	Body	6	0.921532	0.128267	6.74482e-13	0.921532	0.128267	6.74482e-13	0.419836	0.91803	0.325149	1.12582	0.217472	0.884766	0.565272	1.34613	0.396017	0.703182	0.262176	0.317059	0.404082
cg24320225	8	2238305			6	1.25381	0.219134	1.05505e-08	1.25381	0.219134	1.05505e-08	0.94516	0.818426	0.502522	1.36539	0.424104	1.28626	0.628257	1.41367	0.668981	1.48885	0.473502	1.06888	0.693906
cg02457461	8	9913680	MSRA;MSRA	Body;Body	6	-0.863398	0.120316	7.17413e-13	-0.863398	0.120316	7.17413e-13	0.436756	-0.860095	0.315165	-1.1044	0.206062	-0.128905	0.447143	-0.687239	0.369848	-0.931212	0.247837	-0.603536	0.381552
cg07229212	8	11056726	XKR6	Body	6	-0.923139	0.162833	1.43421e-08	-0.923139	0.162833	1.43421e-08	0.952282	-1.02969	0.401814	-0.773483	0.283221	-1.26296	0.694218	-1.23014	0.480873	-0.915537	0.356216	-0.762488	0.457644
cg20902975	8	11138403			6	0.903816	0.161051	2.00015e-08	0.921059	0.141277	7.05254e-11	0.288755	0.513056	0.3683	1.27254	0.254068	1.22842	0.494973	1.10718	0.398567	0.781103	0.283871	0.218778	0.473929
cg07068655	8	12633029	LOC340357	Body	5	1.19945	0.138463	4.61269e-18	1.19945	0.138463	4.61269e-18	0.470627	0.985276	0.363617	1.47766	0.223336	1.07879	0.494624	1.36617	0.401853	0.884238	0.264744	NA	NA
cg20744108	8	13131569	DLC1	Body	6	0.68598	0.112691	1.14837e-09	0.68598	0.112691	1.14837e-09	0.486229	0.761485	0.266122	0.889035	0.200606	0.891781	0.395077	0.466612	0.332024	0.633025	0.248418	0.119817	0.3515
cg13252206	8	16970768	EFHA2	Body	6	0.822677	0.132233	4.92737e-10	0.822677	0.132233	4.92737e-10	0.431242	0.72063	0.330536	1.05964	0.225785	1.47694	0.492704	0.6287	0.430548	0.468361	0.281034	0.682291	0.400148
cg14709253	8	17519419	MTUS1;MTUS1;MTUS1;MTUS1;MTUS1	Body;Body;Body;Body;Body	6	-0.702813	0.117726	2.3737e-09	-0.702916	0.117102	1.94196e-09	0.412128	-0.254613	0.346723	-0.687853	0.177172	-0.443474	0.39446	-0.600241	0.389648	-1.18517	0.290078	-0.807552	0.356899
cg14301348	8	20109523	LZTS1	Body	5	0.857255	0.120132	9.61326e-13	0.857255	0.120132	9.61326e-13	0.437633	0.785896	0.306922	0.892654	0.195651	0.110618	0.426623	1.06406	0.333321	0.97209	0.235327	NA	NA
cg25875537	8	21909033			6	0.71541	0.113661	3.08933e-10	0.715423	0.113317	2.72893e-10	0.413208	1.02984	0.275108	0.501062	0.202382	0.659013	0.384467	0.481507	0.32732	0.982308	0.224293	0.326637	0.483813
cg01675241	8	22074029			6	0.506702	0.0855688	3.1887e-09	0.506702	0.0855688	3.1887e-09	0.843895	0.633801	0.248506	0.563439	0.137833	0.568727	0.426063	0.196697	0.304691	0.520293	0.159702	0.296185	0.285656
cg16031846	8	33628265			6	0.848919	0.146843	7.41981e-09	0.864971	0.131812	5.30334e-11	0.306015	0.849542	0.325392	1.06817	0.2474	0.266922	0.375462	1.09014	0.464604	1.10715	0.269476	0.337592	0.399165
cg20814718	8	35091430			6	0.985475	0.183884	8.3578e-08	0.967828	0.129226	6.91717e-14	0.101205	1.2806	0.320439	0.884061	0.243791	1.72716	0.539066	1.33972	0.364693	0.861934	0.244707	0.0352262	0.420374
cg17486097	8	35093411	UNC5D	Body	6	-0.895818	0.141646	2.54326e-10	-0.895818	0.141646	2.54326e-10	0.639546	-0.413144	0.430639	-0.987724	0.217924	-1.36189	0.469529	-1.22626	0.506254	-0.747137	0.302604	-0.620097	0.497889
cg23411426	8	36955985			6	0.793473	0.123393	1.27236e-10	0.817844	0.109381	7.60414e-14	0.316313	0.530134	0.299881	1.1397	0.178062	0.866469	0.512436	0.682287	0.32932	0.66657	0.219584	0.433477	0.373875
cg26977759	8	37518651			6	0.608658	0.100728	1.51689e-09	0.608658	0.100728	1.51689e-09	0.679505	0.395215	0.238171	0.771112	0.184145	0.530812	0.396338	0.631015	0.285621	0.759659	0.226288	0.326007	0.274342
cg23782083	8	37997055	ASH2L;ASH2L	3'UTR;3'UTR	6	1.22005	0.168686	4.73581e-13	1.22005	0.168686	4.73581e-13	0.618423	1.58602	0.439343	1.40061	0.310612	1.44826	0.50143	1.21443	0.542183	0.698802	0.345929	1.14233	0.508855
cg01976921	8	38342087			6	0.632427	0.109762	8.32184e-09	0.632427	0.109762	8.32184e-09	0.83651	0.405342	0.31764	0.777543	0.184591	0.586898	0.414188	0.304313	0.345866	0.653807	0.209717	0.707812	0.382957
cg25540871	8	38561225			6	0.835876	0.126958	4.58357e-11	0.835876	0.126958	4.58357e-11	0.675114	0.911972	0.365874	1.00125	0.208785	1.22506	0.473047	0.381744	0.43073	0.628286	0.252343	0.770996	0.405979
cg21184369	8	38831148	HTRA4;PLEKHA2	TSS1500;3'UTR	6	-0.771246	0.13481	1.05907e-08	-0.771246	0.13481	1.05907e-08	0.599689	-0.839019	0.365211	-0.601492	0.223604	-0.283827	0.715414	-0.850092	0.435403	-1.16595	0.274175	-0.510023	0.378099
cg14354820	8	41691767	ANK1	Body	6	0.904939	0.139632	9.1178e-11	0.904939	0.139632	9.1178e-11	0.841808	1.09418	0.40983	0.998822	0.251259	0.533814	0.522575	1.19615	0.390634	0.69961	0.256839	0.892668	0.492566
cg23138413	8	49320596			6	0.957493	0.148649	1.18457e-10	0.964708	0.142156	1.15061e-11	0.376892	0.608584	0.388404	1.36839	0.245809	1.14203	0.558221	1.03819	0.428157	0.704405	0.278029	0.556031	0.461015
cg11830605	8	58926487	FAM110B	5'UTR	6	1.1616	0.197878	4.34958e-09	1.1616	0.197878	4.34958e-09	0.548955	1.65633	0.498751	1.10659	0.376149	0.312851	0.56327	1.18443	0.614175	1.43255	0.393077	0.822095	0.67785
cg14266248	8	62606211	ASPH;ASPH;ASPH;ASPH;ASPH	Body;Body;Body;Body;Body	6	0.690641	0.102956	1.97188e-11	0.690641	0.102956	1.97188e-11	0.55387	0.766773	0.270052	0.630835	0.189686	0.356308	0.352164	0.392221	0.294632	0.977067	0.210236	0.716177	0.306756
cg12300018	8	63903574	NKAIN3	3'UTR	6	0.883651	0.142849	6.17406e-10	0.889042	0.118182	5.36661e-14	0.236184	0.507931	0.315265	1.12254	0.203924	1.42388	0.46707	1.27484	0.395585	0.679587	0.253206	0.574832	0.302641
cg07296597	8	94669067			6	0.929442	0.156563	2.91085e-09	0.937012	0.132	1.26026e-12	0.243205	0.431601	0.31388	1.23671	0.243344	0.998381	0.48726	1.40335	0.35606	0.689392	0.284784	0.799499	0.410816
cg16177163	8	97272787	MTERFD1;PTDSS1	5'UTR;TSS1500	6	0.901194	0.168109	8.287e-08	0.901194	0.168109	8.287e-08	0.569153	1.027	0.397551	1.0657	0.295665	1.14675	0.548445	1.12022	0.534941	0.317996	0.343424	1.19652	0.656492
cg05849612	8	98969923	MATN2;MATN2	Body;Body	6	0.763619	0.126738	1.68906e-09	0.763619	0.126738	1.68906e-09	0.706575	0.807617	0.350104	0.778647	0.213	0.746144	0.411004	1.16909	0.371897	0.425887	0.271961	0.958135	0.430854
cg25403895	8	102101217			6	0.743319	0.128974	8.24644e-09	0.743319	0.128974	8.24644e-09	0.932299	0.576555	0.373872	0.730439	0.218814	1.1898	0.455854	0.782473	0.401909	0.748925	0.263167	0.59112	0.388213
cg24412895	8	102115923			6	0.56095	0.102308	4.1833e-08	0.56095	0.102308	4.1833e-08	0.594672	0.804052	0.295461	0.594463	0.180931	0.894072	0.443506	0.772187	0.298878	0.31519	0.177582	0.547674	0.424601
cg24264285	8	103740151			6	0.864166	0.148719	6.21999e-09	0.912095	0.10735	1.95404e-17	0.121211	0.807665	0.270137	1.22251	0.187781	1.11502	0.446341	0.74036	0.318882	0.929489	0.220848	0.157705	0.326921
cg23203234	8	103751623			6	0.698826	0.125444	2.53517e-08	0.72847	0.102465	1.16513e-12	0.216824	0.588441	0.263235	1.08487	0.181434	0.584546	0.359831	0.789021	0.309639	0.567174	0.217984	0.289628	0.298305
cg09721612	8	109321336			6	0.863977	0.157685	4.274e-08	0.863977	0.157685	4.274e-08	0.550853	0.6912	0.381641	1.26987	0.272896	0.689621	0.616538	0.496481	0.434508	0.572518	0.348464	1.00792	0.515603
cg21755755	8	119450829	SAMD12;SAMD12	Body;Body	6	0.684945	0.109888	4.57257e-10	0.684945	0.109888	4.57257e-10	0.438473	0.757345	0.260885	0.958374	0.191411	0.494187	0.332744	0.781506	0.384316	0.427953	0.243833	0.302834	0.349119
cg16015285	8	127583661			5	0.674841	0.103883	8.24034e-11	0.674841	0.103883	8.24034e-11	0.560122	0.338428	0.266749	0.763143	0.165543	1.09714	0.415779	0.711423	0.31249	0.62457	0.195762	NA	NA
cg02194046	8	128409047			6	0.607681	0.113589	8.80363e-08	0.622507	0.104015	2.16651e-09	0.338155	0.4311	0.244272	0.912156	0.178975	0.5828	0.371126	0.340713	0.513316	0.65157	0.217347	0.20607	0.285974
cg08115618	8	134667555			6	0.593358	0.109627	6.2153e-08	0.593358	0.109627	6.2153e-08	0.597637	0.570102	0.308861	0.68059	0.192894	0.527966	0.37385	0.0528521	0.323685	0.772434	0.223535	0.587043	0.330834
cg25398315	8	135938022			6	0.985891	0.174817	1.70473e-08	0.985891	0.174817	1.70473e-08	0.886318	1.01172	0.462131	1.21785	0.311016	1.32264	0.651618	0.683907	0.494366	0.740976	0.339631	1.00404	0.621963
cg06895124	8	141588750	EIF2C2;EIF2C2	Body;Body	6	0.578262	0.102686	1.7881e-08	0.578262	0.102686	1.7881e-08	0.710251	0.490757	0.281596	0.42768	0.173069	0.382781	0.372147	0.884928	0.271938	0.735471	0.215503	0.579831	0.390317
cg01980793	8	141608401	EIF2C2;EIF2C2	Body;Body	5	-0.869488	0.144545	1.79511e-09	-0.873803	0.127893	8.35634e-12	0.307226	-0.318395	0.353121	-0.850764	0.200584	-0.641243	0.402232	-1.2599	0.366923	-1.11921	0.261223	NA	NA
cg21208682	8	141608434	EIF2C2;EIF2C2	Body;Body	6	-0.878359	0.161544	5.4101e-08	-0.88474	0.137855	1.38171e-10	0.282894	-0.829088	0.386762	-0.992828	0.221114	-1.1852	0.805874	-1.51486	0.415863	-0.784403	0.295215	-0.167706	0.386755
cg11132469	8	142432283	PTP4A3;PTP4A3;PTP4A3;PTP4A3	5'UTR;1stExon;1stExon;5'UTR	6	0.91538	0.146592	4.25415e-10	0.91538	0.146592	4.25415e-10	0.637466	0.924666	0.395377	1.16177	0.253672	1.47512	0.640072	0.858341	0.423901	0.714218	0.322891	0.485722	0.377958
cg00220113	8	142450415	FLJ43860	Body	6	0.63906	0.106124	1.72437e-09	0.63906	0.106124	1.72437e-09	0.513188	0.626359	0.300426	0.803104	0.174722	0.304717	0.461488	0.929398	0.429	0.62073	0.199046	0.140671	0.322974
cg23568538	8	143491714			6	0.664901	0.121827	4.8219e-08	0.664901	0.121827	4.8219e-08	0.670381	0.458145	0.312887	0.546639	0.220275	1.1799	0.457173	0.449681	0.325577	0.842874	0.241147	0.870244	0.441153
cg12624721	8	143511575			6	0.457852	0.0718748	1.88856e-10	0.457852	0.0718748	1.88856e-10	0.493912	0.568319	0.208648	0.605458	0.117528	0.326007	0.232534	0.49948	0.233167	0.263373	0.142643	0.294149	0.286617
cg18198461	8	143523293			6	0.722404	0.13338	6.0897e-08	0.748396	0.105669	1.41637e-12	0.195426	0.495257	0.300536	1.02926	0.185309	1.21812	0.40212	0.24837	0.315276	0.697951	0.212702	0.554532	0.301277
cg22988346	8	143618620	BAI1	Body	6	0.865624	0.0997293	3.96691e-18	0.866947	0.0990165	2.03048e-18	0.409578	0.51963	0.268019	1.10137	0.169428	0.708682	0.315933	0.837601	0.314372	0.936629	0.203834	0.52092	0.332704
cg02616368	8	143761680	PSCA	TSS200	6	0.820109	0.120434	9.78459e-12	0.851028	0.0879772	3.91622e-22	0.135935	0.583455	0.249042	1.13762	0.148963	0.988852	0.402383	0.989901	0.250438	0.637406	0.182109	0.518991	0.252083
cg07045857	9	13323113			6	1.08522	0.146349	1.21397e-13	1.08522	0.146349	1.21397e-13	0.496094	0.487988	0.442824	1.22864	0.247167	1.68306	0.502757	1.01754	0.481319	1.16303	0.310182	0.752028	0.390598
cg14099718	9	36879449	PAX5	Body	6	0.784895	0.130704	1.9118e-09	0.794946	0.114125	3.27138e-12	0.284155	0.714259	0.325964	1.05309	0.205518	0.824014	0.364593	1.12232	0.322185	0.560816	0.22525	0.192704	0.382783
cg14165911	9	73594877	TRPM3	Body	6	0.774404	0.14342	6.68024e-08	0.774404	0.14342	6.68024e-08	0.756247	0.417133	0.367654	1.04267	0.250965	0.917521	0.482695	0.83418	0.465764	0.573635	0.315521	0.69789	0.395449
cg13636014	9	84004731			6	0.860742	0.141631	1.22177e-09	0.860742	0.141631	1.22177e-09	0.55733	1.12543	0.332411	1.12934	0.256369	0.522683	0.500415	0.349069	0.435834	0.732778	0.303733	0.669232	0.4268
cg13552026	9	91369283			6	1.05308	0.190834	3.42265e-08	1.09033	0.123513	1.06955e-18	0.0533498	0.700014	0.322123	1.27133	0.21971	1.71083	0.466493	1.15129	0.360235	1.30547	0.252276	0.158996	0.37312
cg21219966	9	101142609	GABBR2	Body	6	0.659877	0.117044	1.72196e-08	0.659877	0.117044	1.72196e-08	0.848886	0.343656	0.31842	0.861794	0.2113	0.640649	0.369125	0.565503	0.348571	0.659208	0.245071	0.604145	0.342676
cg13868356	9	102573997			6	0.879353	0.14678	2.08598e-09	0.93254	0.112514	1.14949e-16	0.156683	0.921125	0.268528	1.32082	0.197983	0.425614	0.344326	0.771722	0.375155	0.922199	0.264323	0.50415	0.320091
cg14475840	9	103191817	C9orf30	5'UTR	6	0.909171	0.130704	3.50229e-12	0.911543	0.114375	1.58978e-15	0.294767	0.672898	0.337711	1.10488	0.192336	1.32088	0.457128	0.926516	0.359312	0.481935	0.237874	1.1399	0.309514
cg14406134	9	117014922	COL27A1	Body	6	0.819493	0.1404	5.31924e-09	0.846243	0.109861	1.33069e-14	0.184232	0.87651	0.300385	1.13554	0.193959	0.146074	0.416676	1.14077	0.318391	0.604934	0.219464	0.631777	0.337039
cg13657200	9	117266029	DFNB31;DFNB31	Body;TSS1500	6	0.634367	0.102062	5.11581e-10	0.634367	0.102062	5.11581e-10	0.659389	0.561668	0.260455	0.725799	0.181509	1.06653	0.383349	0.80412	0.295445	0.436549	0.21087	0.42361	0.313795
cg13781956	9	117826025	TNC	Body	5	0.888156	0.163733	5.81388e-08	0.943668	0.118662	1.82646e-15	0.149003	0.838478	0.287219	1.28509	0.200502	0.0668576	0.481565	0.789016	0.36097	0.841565	0.213027	NA	NA
cg13828579	9	124068414	GSN;GSN;GSN;GSN;GSN;GSN;GSN;GSN	Body;Body;Body;Body;Body;Body;Body;Body	6	0.864957	0.113222	2.181e-14	0.864957	0.113222	2.181e-14	0.491735	0.658291	0.283944	1.1584	0.197878	0.806513	0.364879	0.935546	0.370025	0.771337	0.238862	0.429083	0.359812
cg14594187	9	124498961	DAB2IP	Body	6	-1.02216	0.156109	5.84281e-11	-1.02549	0.137915	1.0404e-13	0.289724	-0.9305	0.34348	-1.21223	0.246936	-1.31146	0.402849	-1.63413	0.458311	-0.733018	0.308253	-0.411492	0.399916
cg14122599	9	124503625	DAB2IP;DAB2IP	TSS1500;Body	6	0.749828	0.109127	6.36817e-12	0.749828	0.109127	6.36817e-12	0.628702	0.665714	0.317785	0.930685	0.194502	0.13593	0.459344	0.988314	0.347498	0.67789	0.223553	0.642089	0.261652
cg13580477	9	124887005			6	0.751358	0.129756	7.01536e-09	0.761217	0.114427	2.88326e-11	0.294144	0.573107	0.263328	0.956472	0.217825	0.733886	0.387236	1.14524	0.345375	0.758874	0.22128	-0.0518773	0.430284
cg14584535	9	125797187	GPR21;RABGAP1	1stExon;Body	6	-0.711121	0.129453	3.94555e-08	-0.711121	0.129453	3.94555e-08	0.503766	-0.672394	0.361596	-0.674759	0.221297	-0.548469	0.517213	-1.35362	0.389865	-0.771885	0.274907	-0.290983	0.352334
cg14002328	9	126271315	DENND1A;DENND1A	Body;Body	6	0.568129	0.0940516	1.53528e-09	0.568129	0.0940516	1.53528e-09	0.984828	0.478488	0.26353	0.537029	0.164893	0.509481	0.335945	0.673895	0.281638	0.552403	0.189722	0.731159	0.281475
cg13609861	9	133780848	FIBCD1;FIBCD1	Body;Body	6	0.687798	0.114443	1.85589e-09	0.687798	0.114443	1.85589e-09	0.557654	0.338527	0.318911	0.769267	0.198526	0.629494	0.394785	1.21079	0.378145	0.726601	0.242817	0.448915	0.304619
cg14616345	9	133901267	LAMC3	Body	6	0.66234	0.121136	4.55797e-08	0.66234	0.121136	4.55797e-08	0.469991	0.460282	0.284868	0.864225	0.223196	0.983476	0.430072	0.518378	0.361125	0.387505	0.240284	1.1412	0.432057
cg14188856	9	134717506			6	0.643629	0.109041	3.57722e-09	0.643629	0.109041	3.57722e-09	0.862428	0.32704	0.342456	0.799117	0.186385	0.660591	0.431575	0.661023	0.31753	0.646251	0.229777	0.477323	0.282111
cg16112945	9	136285806	ADAMTS13;ADAMTS13;ADAMTS13;ADAMTS13	Body;TSS1500;TSS1500;TSS1500	6	0.728382	0.129313	1.77401e-08	0.748065	0.100731	1.11611e-13	0.173926	0.605665	0.290681	1.11716	0.187907	0.350298	0.37374	0.963968	0.289091	0.502899	0.195703	0.588338	0.275623
cg14207613	9	137726903	COL5A1	Body	5	0.789704	0.147271	8.2189e-08	0.789704	0.147271	8.2189e-08	0.530555	0.297039	0.417116	0.854193	0.227956	1.48285	0.674226	1.03458	0.380674	0.654537	0.288499	NA	NA
cg14485901	9	139913752	ABCA2;ABCA2	Body;Body	6	0.6917	0.128209	6.84947e-08	0.6917	0.128209	6.84947e-08	0.900699	0.818534	0.378011	0.748369	0.221148	0.739838	0.559991	0.703598	0.390455	0.751408	0.250234	0.270511	0.361027
cg23934071	10	91802			6	0.642013	0.116306	3.38889e-08	0.642013	0.116306	3.38889e-08	0.681783	0.399899	0.280604	0.785275	0.211429	0.916597	0.421826	0.663107	0.314936	0.696982	0.239065	0.138617	0.420458
cg26361041	10	1234237	ADARB2	Body	6	0.752126	0.137097	4.10934e-08	0.75384	0.133817	1.76707e-08	0.39246	0.8693	0.325027	0.859019	0.236224	0.532202	0.450722	1.25978	0.345491	0.367047	0.31129	0.3128	0.454634
cg10568634	10	5005562	AKR1C1;AKR1C1	5'UTR;1stExon	6	0.963891	0.165278	5.4782e-09	0.963891	0.165278	5.4782e-09	0.518885	1.18027	0.400861	1.28876	0.30564	1.10783	0.515531	0.887363	0.496579	0.656901	0.332773	0.157504	0.594286
cg27250032	10	5544140			6	0.987544	0.180723	4.64488e-08	0.987544	0.180723	4.64488e-08	0.802751	1.20724	0.48499	1.01169	0.324849	0.864324	0.632738	1.39843	0.514567	0.931647	0.35627	0.269021	0.604465
cg18705776	10	5565829	CALML3	TSS1500	5	0.675248	0.108729	5.28617e-10	0.675248	0.108729	5.28617e-10	0.825938	0.578116	0.24237	0.677416	0.17304	0.919445	0.334929	0.84719	0.295868	0.490134	0.268906	NA	NA
cg07469647	10	11805282	ECHDC3	Body	5	0.806392	0.144177	2.23094e-08	0.806392	0.144177	2.23094e-08	0.806151	0.891817	0.387079	0.864318	0.228351	0.814672	0.453004	1.13481	0.441391	0.528245	0.285722	NA	NA
cg11891925	10	13091949			6	1.10973	0.166394	2.57015e-11	1.12265	0.148441	3.94063e-14	0.316313	1.3724	0.435473	1.49205	0.250923	1.34453	0.506604	0.691779	0.523907	0.714341	0.287268	0.78762	0.467803
cg26559209	10	13570012			6	-0.682537	0.0991862	5.92793e-12	-0.682537	0.0991862	5.92793e-12	0.682525	-0.862988	0.310319	-0.757751	0.153284	-0.259221	0.411913	-0.650857	0.347426	-0.732199	0.198352	-0.289444	0.331369
cg11679124	10	14058944	FRMD4A	Body	6	0.643554	0.11515	2.2863e-08	0.643554	0.11515	2.2863e-08	0.691165	0.385039	0.277441	0.845081	0.203245	0.564691	0.341584	-0.300866	0.883078	0.647175	0.238308	0.671733	0.304912
cg04813697	10	22920025	PIP4K2A	Body	6	1.68131	0.22509	8.05117e-14	1.69137	0.185243	6.81445e-20	0.227591	2.19975	0.498459	1.7985	0.332671	0.551789	0.664138	2.39409	0.516961	1.42694	0.36879	1.28113	0.606382
cg09904358	10	24446911	KIAA1217	5'UTR	6	0.809116	0.132261	9.5016e-10	0.809116	0.132261	9.5016e-10	0.597704	0.803731	0.288283	1.10315	0.234398	0.942252	0.474462	0.609438	0.562136	0.438904	0.269415	0.782822	0.424537
cg10317175	10	25247855			6	0.694349	0.121721	1.16728e-08	0.694349	0.121721	1.16728e-08	0.672683	0.831763	0.34316	0.83226	0.195121	0.83208	0.471749	1.00321	0.470424	0.432159	0.232993	0.322162	0.434222
cg14704968	10	26730696	APBB1IP	5'UTR	6	0.669477	0.117186	1.11051e-08	0.688443	0.102707	2.04214e-11	0.281963	0.677868	0.240544	0.965567	0.184053	0.159384	0.349448	0.874025	0.307213	0.569227	0.237204	0.381327	0.295679
cg02987618	10	30054988			6	0.851174	0.149705	1.30284e-08	0.899537	0.108418	1.06821e-16	0.122276	0.676486	0.271292	1.1901	0.187534	0.66575	0.436379	1.13301	0.326522	0.932882	0.231134	0.196953	0.321019
cg03127349	10	31101116			6	0.771421	0.140625	4.11956e-08	0.771421	0.140625	4.11956e-08	0.803468	0.813125	0.372285	1.01205	0.258865	0.568202	0.444626	0.827833	0.408088	0.714504	0.289205	0.30527	0.429916
cg16489259	10	32438418			6	0.818554	0.126231	8.89975e-11	0.818554	0.126231	8.89975e-11	0.435201	0.426513	0.304498	1.09134	0.222818	0.501647	0.437935	0.829628	0.374192	0.971484	0.259983	0.400689	0.462272
cg10772185	10	34320548			6	0.712862	0.12804	2.58401e-08	0.712862	0.12804	2.58401e-08	0.599998	0.496675	0.343503	0.951108	0.223873	0.783495	0.420384	0.990116	0.364333	0.448345	0.27349	0.40107	0.407963
cg14338073	10	44359161			6	0.684354	0.106423	1.27189e-10	0.68701	0.100714	9.01546e-12	0.363957	0.947622	0.25082	0.829326	0.175948	0.546892	0.349894	0.907464	0.312422	0.394399	0.213566	0.34494	0.315415
cg09623279	10	45395734			6	0.681055	0.118461	8.96602e-09	0.681055	0.118461	8.96602e-09	0.676656	0.699128	0.30422	0.729043	0.208242	0.621261	0.481532	0.689843	0.351649	0.89614	0.249543	0.169831	0.334496
cg07371628	10	49811797	ARHGAP22	Body	6	0.730154	0.103431	1.67268e-12	0.730154	0.103431	1.67268e-12	0.72056	0.49544	0.271856	0.800114	0.174211	1.14052	0.457266	0.871469	0.307803	0.761529	0.221373	0.443676	0.298103
cg00857536	10	50298306	C10orf72	Body	6	0.642014	0.106625	1.73085e-09	0.642014	0.106625	1.73085e-09	0.60835	0.443608	0.273623	0.860608	0.187654	0.595295	0.311047	0.884154	0.323821	0.409399	0.246827	0.484155	0.317521
cg03370951	10	50396692	C10orf128	TSS1500	6	-0.481063	0.0873976	3.70624e-08	-0.481063	0.0873976	3.70624e-08	0.673137	-0.286289	0.248582	-0.550442	0.130923	-0.450335	0.438129	-0.292298	0.333181	-0.665124	0.192767	-0.21982	0.255934
cg06754496	10	52268375	SGMS1	5'UTR	6	0.725647	0.129596	2.15217e-08	0.725647	0.129596	2.15217e-08	0.673305	0.584226	0.289098	1.0128	0.240507	1.06743	0.513317	0.659515	0.355471	0.564536	0.274426	0.365949	0.434349
cg10584904	10	60173756			6	1.04166	0.168054	5.70501e-10	1.07273	0.104048	6.35222e-25	0.0474757	0.804539	0.292428	1.41989	0.17178	1.60723	0.372425	0.910558	0.451595	0.689294	0.207537	0.829685	0.295434
cg09873584	10	60348937	BICC1	Body	6	0.487871	0.0868032	1.90485e-08	0.487871	0.0868032	1.90485e-08	0.457461	0.409519	0.240821	0.672606	0.14444	0.614697	0.314659	0.0766474	0.254202	0.420113	0.186215	0.452319	0.275982
cg26159090	10	60474252	BICC1;LOC728640	Body;TSS1500	6	0.769222	0.117576	6.0567e-11	0.769222	0.117576	6.0567e-11	0.535507	0.785599	0.280905	1.05194	0.200313	0.565035	0.462497	0.440848	0.417947	0.682625	0.24408	0.376807	0.363771
cg13393433	10	63525851	C10orf107	3'UTR	6	-0.638204	0.104365	9.64871e-10	-0.638204	0.104365	9.64871e-10	0.747663	-0.618821	0.300794	-0.642512	0.167195	-0.498799	0.438147	-0.695639	0.31671	-0.895181	0.240889	-0.302973	0.282022
cg14419424	10	65388604			6	-1.34468	0.162809	1.4657e-16	-1.34851	0.158875	2.10473e-17	0.396688	-1.06802	0.417271	-1.56426	0.256337	-1.40231	0.782815	-1.89742	0.473948	-1.22211	0.337956	-0.536952	0.511883
cg11820931	10	70717302	DDX21	Body	6	1.0107	0.139731	4.71904e-13	1.01079	0.139391	4.12264e-13	0.413485	1.02393	0.357616	1.27651	0.257213	0.955949	0.438383	1.44224	0.388518	0.588125	0.287839	0.667574	0.464497
cg15256053	10	71634316	COL13A1;COL13A1;COL13A1;COL13A1;COL13A1;COL13A1;COL13A1;COL13A1;COL13A1;COL13A1;COL13A1;COL13A1;COL13A1;COL13A1;COL13A1;COL13A1;COL13A1;COL13A1;COL13A1;COL13A1	Body;Body;Body;Body;Body;Body;Body;Body;Body;Body;Body;Body;Body;Body;Body;Body;Body;Body;Body;Body	6	0.688888	0.112167	8.16815e-10	0.691164	0.110315	3.71973e-10	0.400829	0.787344	0.299754	0.982565	0.192011	0.669382	0.410919	0.625186	0.324617	0.472721	0.226027	0.249767	0.334565
cg00661347	10	71661228	COL13A1;COL13A1;COL13A1;COL13A1;COL13A1;COL13A1;COL13A1;COL13A1;COL13A1;COL13A1;COL13A1;COL13A1;COL13A1;COL13A1;COL13A1;COL13A1;COL13A1;COL13A1;COL13A1;COL13A1	Body;Body;Body;Body;Body;Body;Body;Body;Body;Body;Body;Body;Body;Body;Body;Body;Body;Body;Body;Body	5	1.00142	0.124158	7.28499e-16	1.00268	0.109948	7.53747e-20	0.309923	1.07117	0.28242	1.19517	0.183673	0.579191	0.463565	1.26875	0.31342	0.718659	0.197219	NA	NA
cg09082487	10	71689487	COL13A1;COL13A1;COL13A1;COL13A1;COL13A1;COL13A1;COL13A1;COL13A1;COL13A1;COL13A1;COL13A1;COL13A1;COL13A1;COL13A1;COL13A1;COL13A1;COL13A1;COL13A1;COL13A1;COL13A1	Body;Body;Body;Body;Body;Body;Body;Body;Body;Body;Body;Body;Body;Body;Body;Body;Body;Body;Body;Body	6	0.75171	0.112144	2.04076e-11	0.753647	0.107501	2.37255e-12	0.38095	1.04041	0.323497	0.879651	0.177304	0.971712	0.394544	0.842134	0.363792	0.601821	0.216838	0.190157	0.317529
cg23761815	10	73083123	SLC29A3	Body	6	0.781085	0.141254	3.20878e-08	0.805604	0.11961	1.63614e-11	0.254548	0.809812	0.31281	0.859935	0.215436	0.171357	0.472224	0.747936	0.381417	1.19207	0.242243	0.337239	0.320527
cg09501025	10	73312955	CDH23;CDH23	Body;Body	6	0.658771	0.123036	8.58929e-08	0.658771	0.123036	8.58929e-08	0.471135	0.384071	0.311856	0.759631	0.215159	0.506154	0.491907	1.25466	0.353666	0.543593	0.259871	0.41266	0.371635
cg27592794	10	74454766	CCDC109A	Body	6	-0.766085	0.112041	8.05571e-12	-0.766085	0.112041	8.05571e-12	0.838377	-0.720428	0.324284	-0.829204	0.182996	-0.892669	0.580391	-0.929008	0.308191	-0.796974	0.246147	-0.372282	0.311765
cg08834573	10	77005666			6	0.732821	0.113384	1.02521e-10	0.739402	0.107293	5.52235e-12	0.363617	0.713889	0.281195	1.03444	0.192367	0.586879	0.406201	0.878538	0.308069	0.559252	0.215904	0.26639	0.330621
cg25518362	10	78651384	KCNMA1;KCNMA1;KCNMA1;KCNMA1	Body;Body;Body;Body	6	0.962723	0.17038	1.60049e-08	0.962723	0.17038	1.60049e-08	0.5491	1.20356	0.602487	0.852456	0.348174	1.50204	0.464664	1.28335	0.461845	0.475263	0.352828	0.989128	0.405187
cg19730814	10	79079736	KCNMA1;KCNMA1;KCNMA1;KCNMA1	Body;Body;Body;Body	6	0.693375	0.127328	5.16348e-08	0.693375	0.127328	5.16348e-08	0.81621	0.601712	0.327676	0.891818	0.22091	0.851221	0.4303	0.289977	0.382602	0.646477	0.283498	0.592591	0.372622
cg02499967	10	79188211	KCNMA1;KCNMA1;KCNMA1;KCNMA1	Body;Body;Body;Body	6	0.606741	0.107503	1.66206e-08	0.606741	0.107503	1.66206e-08	0.44787	0.880945	0.265094	0.845251	0.201285	0.390733	0.285209	0.270671	0.341319	0.478279	0.234755	0.383617	0.341119
cg18719787	10	79929586			5	1.25155	0.160188	5.58316e-15	1.25155	0.160188	5.58316e-15	0.408094	0.994533	0.429472	1.63699	0.258608	0.844981	0.371282	1.07821	0.413106	1.17774	0.427076	NA	NA
cg05757757	10	80008637			6	-0.79077	0.143249	3.38521e-08	-0.811625	0.126365	1.3372e-10	0.325345	-0.512687	0.307661	-0.995053	0.191252	-1.49931	0.614147	-0.620369	0.420115	-0.835712	0.277505	0.0393598	0.540865
cg06175907	10	80026711			6	0.6729	0.119395	1.74133e-08	0.67473	0.108175	4.44857e-10	0.330797	0.267824	0.232181	0.85875	0.183167	0.890061	0.422493	1.01123	0.317054	0.557559	0.239527	0.565931	0.492591
cg02230650	10	81679790	MBL1P	TSS200	5	0.95581	0.166948	1.03309e-08	0.93811	0.134787	3.4036e-12	0.232987	0.927345	0.344178	0.973353	0.212587	1.10623	0.523784	1.57843	0.374273	0.509146	0.270263	NA	NA
cg00415971	10	86004761	RGR;RGR;RGR	TSS200;TSS200;TSS200	6	0.998905	0.16929	3.623e-09	1.04288	0.136393	2.07076e-14	0.219899	0.536544	0.356752	1.48214	0.24332	0.984194	0.509377	1.02131	0.375771	0.988636	0.257653	0.296399	0.576671
cg19989498	10	87336967			6	0.848339	0.120895	2.26475e-12	0.851506	0.118969	8.22522e-13	0.401086	0.76833	0.300746	1.12998	0.208675	0.809973	0.413474	0.675999	0.339297	0.884258	0.249521	0.149922	0.407064
cg23877683	10	88122364	GRID1	Body	6	0.607242	0.112452	6.66399e-08	0.607503	0.102448	3.0317e-09	0.332552	0.124737	0.252515	0.579405	0.175273	0.536177	0.400861	0.86174	0.312621	0.839164	0.209435	0.74188	0.358275
cg17083429	10	89627854	PTEN	Body	6	-1.32626	0.201352	4.49567e-11	-1.32626	0.201352	4.49567e-11	0.788795	-1.26136	0.489248	-1.5657	0.358376	-1.50504	0.737003	-1.64389	0.572504	-0.762188	0.448049	-1.29737	0.594642
cg12083893	10	91111929			6	0.941425	0.16417	9.78194e-09	0.977279	0.104775	1.08459e-20	0.0481508	1.08491	0.264265	1.25484	0.181242	0.487716	0.416723	1.49423	0.324407	0.616723	0.231579	0.545801	0.283703
cg19192065	10	93335091	LOC100188947	Body	6	0.71741	0.134188	8.97691e-08	0.71741	0.134188	8.97691e-08	0.528825	0.439667	0.32118	1.03083	0.260549	0.873468	0.543965	0.422297	0.369212	0.547886	0.262238	1.08947	0.413299
cg00532335	10	95516861	LGI1	TSS1500	6	0.696439	0.121548	1.00593e-08	0.696439	0.121548	1.00593e-08	0.471312	0.665553	0.30788	0.58886	0.209864	0.0990896	0.458082	1.16919	0.333864	0.843237	0.247766	0.465457	0.476476
cg24201941	10	99697034	CRTAC1	Body	6	1.02344	0.18067	1.47281e-08	1.02234	0.144906	1.72379e-12	0.203129	0.451355	0.328328	1.40458	0.277665	1.36942	0.402882	1.39303	0.453934	0.785225	0.287605	0.700427	0.663165
cg08702879	10	101359056			6	0.746932	0.134217	2.62002e-08	0.746932	0.134217	2.62002e-08	0.758347	0.65045	0.321827	0.97963	0.233546	0.671567	0.599724	0.899371	0.386927	0.415971	0.283155	0.744154	0.422935
cg05580001	10	102422713			6	0.589925	0.0983544	1.99826e-09	0.589925	0.0983544	1.99826e-09	0.488392	0.239588	0.252906	0.637716	0.167842	0.415851	0.452997	0.977454	0.303205	0.689107	0.198141	0.398228	0.301237
cg17962384	10	103601188	KCNIP2;KCNIP2;KCNIP2;KCNIP2;KCNIP2;KCNIP2	Body;Body;Body;Body;Body;Body	5	-0.915112	0.130356	2.21709e-12	-0.915112	0.130356	2.21709e-12	0.645458	-0.985126	0.297811	-1.01765	0.22432	-1.00638	0.390051	-1.16198	0.388067	-0.565408	0.262725	NA	NA
cg27517345	10	104536052	C10orf26;C10orf26;C10orf26	5'UTR;Body;1stExon	6	-0.876062	0.138831	2.78546e-10	-0.876062	0.138831	2.78546e-10	0.431917	-0.811858	0.371782	-1.1912	0.221455	-0.285189	0.539934	-0.741482	0.450467	-0.81097	0.293289	-0.287745	0.4837
cg14151372	10	108045557			6	0.675082	0.122784	3.83836e-08	0.675082	0.122784	3.83836e-08	0.431415	0.647006	0.289637	0.770606	0.213193	0.514444	0.421639	0.807344	0.360681	0.796372	0.25271	-0.424083	0.53929
cg03652339	10	112258641	DUSP5	Body	5	0.857681	0.141666	1.4108e-09	0.857681	0.141666	1.4108e-09	0.724707	0.821651	0.36783	1.09193	0.239531	0.833423	0.439503	0.488707	0.364917	0.783004	0.284894	NA	NA
cg18511011	10	115348546	HABP2	3'UTR	6	0.655159	0.0975086	1.82991e-11	0.655159	0.0975086	1.82991e-11	0.516243	0.787734	0.268888	0.775482	0.167867	0.743745	0.355809	0.618737	0.275382	0.634966	0.200955	0.073397	0.316084
cg12649038	10	116282534	ABLIM1;ABLIM1;ABLIM1;ABLIM1	Body;Body;5'UTR;Body	6	-0.861942	0.146566	4.07969e-09	-0.861942	0.146566	4.07969e-09	0.688217	-0.542576	0.365045	-0.989353	0.25909	-0.388659	0.426806	-1.25322	0.461569	-0.940505	0.300925	-0.99617	0.584789
cg25916172	10	118937897			6	0.642386	0.119205	7.08882e-08	0.65702	0.100364	5.89529e-11	0.238882	0.281978	0.266896	0.948384	0.185316	0.704971	0.337275	0.891421	0.299231	0.588054	0.213885	0.324782	0.264441
cg05307477	10	118956803	KCNK18	TSS200	6	0.701305	0.128185	4.47402e-08	0.713962	0.104071	6.86903e-12	0.211705	0.622718	0.289151	0.928834	0.183893	1.06923	0.354264	0.837155	0.32477	0.620774	0.218114	0.121666	0.284794
cg01160452	10	118957098	KCNK18	1stExon	6	0.733297	0.11884	6.80828e-10	0.756694	0.105441	7.15422e-13	0.303081	0.481776	0.3208	1.06699	0.181348	0.20479	0.374576	0.721407	0.325941	0.683373	0.220386	0.678817	0.28069
cg09417176	10	123993026	TACC2;TACC2;TACC2;TACC2	Body;Body;Body;Body	6	0.637183	0.116083	4.0413e-08	0.637183	0.116083	4.0413e-08	0.790764	0.311315	0.303539	0.767304	0.204891	0.799982	0.36514	0.763988	0.334284	0.477513	0.245397	0.750265	0.39281
cg27230705	10	124380473	DMBT1;DMBT1;DMBT1	Body;Body;Body	6	0.899897	0.161854	2.6988e-08	0.899897	0.161854	2.6988e-08	0.760132	0.651818	0.434757	1.00217	0.275147	1.58722	0.60501	0.517754	0.510743	0.96378	0.333175	0.649423	0.493923
cg24158157	10	124581726			5	1.12659	0.134053	4.31246e-17	1.12659	0.134053	4.31246e-17	0.586032	0.93238	0.364495	1.38366	0.203509	0.954503	0.495118	0.882255	0.441827	0.937634	0.260171	NA	NA
cg13557752	10	125448352	GPR26	3'UTR	6	0.746214	0.112556	3.36378e-11	0.746214	0.112556	3.36378e-11	0.504097	0.653013	0.29157	0.85706	0.205298	0.116286	0.474107	0.949742	0.330063	0.862806	0.209986	0.29176	0.37431
cg20566475	10	126278272	LHPP;LHPP	Body;Body	6	0.711835	0.123486	8.18939e-09	0.711835	0.123486	8.18939e-09	0.824636	0.315598	0.369002	0.69255	0.211887	1.01439	0.501774	0.731995	0.378827	0.88356	0.23943	0.580113	0.363273
cg25308381	10	127262851	LOC100169752	TSS200	6	0.807683	0.149928	7.15852e-08	0.837102	0.11646	6.58039e-13	0.180058	0.849267	0.305671	1.20063	0.2075	1.04205	0.495079	0.724885	0.369902	0.708059	0.230731	0.19686	0.322252
cg16476048	10	127372281	C10orf122	TSS1500	6	0.852968	0.139539	9.79148e-10	0.852968	0.139539	9.79148e-10	0.936432	0.663231	0.36269	0.891172	0.254555	0.862833	0.423306	1.21067	0.414459	0.826043	0.274794	0.600684	0.521382
cg14995235	10	128887795	DOCK1	Body	6	0.822531	0.109023	4.53764e-14	0.834033	0.0992801	4.43405e-17	0.334006	0.911464	0.26692	0.996792	0.167772	0.256696	0.466239	1.03341	0.285741	0.774181	0.201223	0.333727	0.310872
cg18685034	10	129245532	DOCK1	Body	6	0.849345	0.127029	2.29016e-11	0.849345	0.127029	2.29016e-11	0.92902	0.825334	0.362364	0.875879	0.214418	1.42416	0.597862	0.941331	0.361843	0.746983	0.258752	0.686759	0.371806
cg14479798	10	129533998			6	1.37964	0.254811	6.15083e-08	1.37964	0.254811	6.15083e-08	0.564166	2.05692	0.633456	1.41947	0.481251	1.27157	0.760076	1.02941	0.770862	1.56172	0.509764	0.0377986	0.867246
cg08872425	10	131231406			6	0.640081	0.108697	3.89295e-09	0.640081	0.108697	3.89295e-09	0.880287	0.578728	0.298739	0.65249	0.186283	0.916676	0.461455	0.920532	0.353019	0.613053	0.211716	0.367119	0.322994
cg09639430	10	131694830	EBF3	Body	5	1.05548	0.188954	2.32484e-08	1.0519	0.173453	1.32374e-09	0.328663	0.480175	0.445035	1.06296	0.303213	1.07102	0.506576	1.86861	0.480616	0.959054	0.33175	NA	NA
cg25707298	10	133799420			6	0.867514	0.124921	3.7974e-12	0.867514	0.124921	3.7974e-12	0.57121	0.671179	0.329707	1.0758	0.218276	0.714357	0.512067	0.823227	0.394972	1.02223	0.252909	0.355255	0.35277
cg06566384	10	134316400			6	-0.54098	0.0921704	4.37517e-09	-0.54098	0.0921704	4.37517e-09	0.558045	-0.496413	0.224253	-0.495092	0.158396	0.0176277	0.372555	-0.914078	0.324788	-0.621806	0.206746	-0.614321	0.236433
cg08284926	10	134826760			6	0.693429	0.127923	5.93789e-08	0.693429	0.127923	5.93789e-08	0.575777	0.543557	0.37338	0.789126	0.219308	1.00889	0.406724	1.10587	0.375144	0.399528	0.26323	0.421753	0.424065
cg00090737	10	135000089	KNDC1	Body	6	0.789392	0.122529	1.17539e-10	0.789392	0.122529	1.17539e-10	0.85201	1.06202	0.315741	0.623954	0.21987	0.693887	0.361695	0.665469	0.346961	0.857907	0.259686	1.06937	0.442326
cg05468584	10	135061287	MIR202	TSS200	6	0.877012	0.163325	7.88469e-08	0.867433	0.124981	3.90724e-12	0.173406	0.884915	0.378215	0.98858	0.208332	0.709979	0.479239	1.72831	0.402568	0.464698	0.261248	0.681412	0.33688
cg25735572	11	1159315			6	0.72161	0.107903	2.26912e-11	0.72161	0.107903	2.26912e-11	0.467111	0.451196	0.268584	0.899254	0.186525	0.313614	0.449367	0.826119	0.281684	0.78664	0.209023	-0.0330094	0.593483
cg14909325	11	1674770	HCCA2	Body	6	0.59327	0.108218	4.20076e-08	0.59327	0.108218	4.20076e-08	0.753257	0.427256	0.303624	0.53532	0.184994	1.03661	0.473018	0.923634	0.333583	0.609463	0.207303	0.380042	0.341074
cg07824888	11	1976536	MRPL23	Body	6	-0.450707	0.0796635	1.53472e-08	-0.450707	0.0796635	1.53472e-08	0.5599	-0.560993	0.191835	-0.45816	0.141314	-0.740457	0.429246	-0.667539	0.21024	-0.209285	0.17872	-0.341484	0.218403
cg08227583	11	2118566			6	0.759143	0.138045	3.814e-08	0.78312	0.117238	2.39396e-11	0.262227	0.631949	0.360069	1.03109	0.202882	0.331295	0.454964	1.14538	0.31662	0.676322	0.239022	0.259246	0.344279
cg12752325	11	2137875			6	0.737304	0.129271	1.17351e-08	0.737304	0.129271	1.17351e-08	0.579467	0.529116	0.316407	1.09276	0.228088	0.465479	0.487462	0.5545	0.35538	0.662813	0.266886	0.487381	0.473295
cg19297427	11	2181595	INS-IGF2;INS-IGF2;INS	Body;Body;Body	5	0.880276	0.112094	4.06152e-15	0.880276	0.112094	4.06152e-15	0.797466	1.05498	0.293801	0.975454	0.176626	0.659766	0.595746	0.608028	0.31189	0.80785	0.209204	NA	NA
cg04204669	11	2193742	TH;TH;TH	TSS1500;TSS1500;TSS1500	6	0.891	0.119288	8.06234e-14	0.899179	0.113612	2.4828e-15	0.372255	0.521468	0.30213	1.15246	0.197623	1.05243	0.416504	0.851416	0.322102	0.935007	0.226749	0.32709	0.406198
cg15839913	11	2226480			6	0.593814	0.103568	9.83468e-09	0.593814	0.103568	9.83468e-09	0.529611	0.420316	0.241468	0.771559	0.178174	0.416178	0.742219	0.963511	0.32559	0.4805	0.207915	0.283197	0.313172
cg04894537	11	2763171	KCNQ1;KCNQ1	Body;Body	6	0.560806	0.0971059	7.68604e-09	0.560806	0.0971059	7.68604e-09	0.660152	0.353695	0.288101	0.681799	0.158846	0.51989	0.43902	0.762915	0.303551	0.550554	0.185593	0.132327	0.327973
cg13059136	11	2986541	SNORA54;NAP1L4	TSS1500;Body	6	0.910974	0.167833	5.70318e-08	0.910974	0.167833	5.70318e-08	0.538451	1.02292	0.432733	1.01746	0.290461	0.0797375	0.525928	0.839057	0.532151	1.24172	0.353889	0.520077	0.561048
cg16770368	11	6673784	DCHS1	5'UTR	6	0.704638	0.0974334	4.75934e-13	0.703268	0.0900557	5.75265e-15	0.342863	0.545809	0.209814	0.784379	0.157856	0.860046	0.304689	1.18468	0.279048	0.512872	0.188909	0.452286	0.336678
cg14784922	11	8199971			6	0.648219	0.114059	1.322e-08	0.648219	0.114059	1.322e-08	0.704438	0.786464	0.282104	0.787819	0.198868	0.832121	0.461587	0.411678	0.327876	0.620822	0.240454	0.200862	0.359788
cg08592104	11	8761869	ST5;ST5;ST5	Body;Body;Body	6	0.786969	0.127036	5.8333e-10	0.78798	0.126075	4.10238e-10	0.408607	0.883766	0.307885	1.05904	0.226622	1.13055	0.494612	0.425772	0.362834	0.71211	0.272587	0.282693	0.359198
cg07349899	11	11443325	GALNTL4	Body	6	0.510068	0.0928969	4.0037e-08	0.510068	0.0928969	4.0037e-08	0.824212	0.392042	0.239978	0.492714	0.163921	0.420987	0.300192	0.855386	0.288605	0.569108	0.197207	0.351414	0.28306
cg02501827	11	11862879	USP47	TSS200	6	-1.0195	0.169255	1.70773e-09	-1.0195	0.169255	1.70773e-09	0.767412	-1.29807	0.396183	-1.01459	0.302207	-1.32673	0.596971	-1.22355	0.516459	-0.910532	0.388434	-0.42321	0.476523
cg21198586	11	12791832	TEAD1	Body	6	0.559713	0.102072	4.16925e-08	0.559713	0.102072	4.16925e-08	0.857507	0.537317	0.252488	0.500085	0.17818	0.532085	0.391643	0.498295	0.299356	0.780415	0.205362	0.271066	0.367414
cg11619602	11	13360707	ARNTL;ARNTL;ARNTL	5'UTR;5'UTR;5'UTR	6	0.801602	0.149575	8.35932e-08	0.801602	0.149575	8.35932e-08	0.702451	1.1942	0.378172	0.814694	0.279735	0.85525	0.519738	1.15732	0.50282	0.46484	0.290989	0.702509	0.428016
cg19115017	11	15229502	INSC;INSC	Body;Body	6	0.638279	0.117983	6.30538e-08	0.638279	0.117983	6.30538e-08	0.957836	0.860977	0.283826	0.634186	0.199102	0.69079	0.423552	0.50632	0.360644	0.5053	0.24958	0.678303	0.452553
cg08239103	11	16623818			6	0.769267	0.121049	2.08431e-10	0.769267	0.121049	2.08431e-10	0.453349	1.08803	0.284922	0.919118	0.227603	0.73697	0.393646	0.55569	0.373928	0.784821	0.281496	0.261538	0.310108
cg13295314	11	17442919	ABCC8	Body	5	0.896475	0.101953	1.45612e-18	0.896475	0.101953	1.45612e-18	0.417167	0.857049	0.229534	1.12703	0.171643	0.657172	0.446007	0.527075	0.279662	0.851276	0.19815	NA	NA
cg03015592	11	17602053			6	1.00669	0.148952	1.39431e-11	1.00669	0.148952	1.39431e-11	0.664722	1.07812	0.367674	1.14293	0.288589	1.46825	0.482991	0.610964	0.400991	1.02303	0.289918	0.432019	0.553457
cg14294658	11	17994507	SERGEF	Body	6	0.460211	0.0859147	8.48004e-08	0.460211	0.0859147	8.48004e-08	0.647604	0.331523	0.22388	0.583703	0.139117	-0.747298	0.866859	0.479736	0.414275	0.460318	0.163536	0.339826	0.227587
cg19141411	11	18754784	PTPN5;PTPN5;PTPN5	Body;Body;Body	6	0.672933	0.12346	5.01928e-08	0.672933	0.12346	5.01928e-08	0.856265	0.828008	0.351345	0.635231	0.209711	0.225301	0.437028	0.748105	0.371082	0.853464	0.26537	0.528598	0.352023
cg11077392	11	19719446	NAV2	Body	6	1.01635	0.141214	6.14479e-13	1.01635	0.141214	6.14479e-13	0.457864	0.531127	0.405933	1.09153	0.240908	1.51507	0.44853	1.46399	0.414965	0.790322	0.282996	0.846937	0.528262
cg11027717	11	33713904			6	0.70185	0.119012	3.69439e-09	0.70185	0.119012	3.69439e-09	0.681657	0.942506	0.346188	0.802209	0.197185	0.988257	0.492415	0.411847	0.410684	0.663434	0.228055	0.245574	0.371151
cg24521811	11	33719716	C11orf91	3'UTR	6	0.679553	0.119782	1.40102e-08	0.679553	0.119782	1.40102e-08	0.733726	0.888102	0.297065	0.738389	0.216633	1.03014	0.406047	0.685288	0.371623	0.405582	0.240056	0.518479	0.395323
cg11822932	11	33913716	LMO2;LMO2	1stExon;5'UTR	5	-0.850578	0.147722	8.51317e-09	-0.850578	0.147722	8.51317e-09	0.722592	-0.598661	0.382112	-0.999512	0.227692	-0.231525	0.603245	-1.00119	0.399831	-0.814229	0.305924	NA	NA
cg03818576	11	40312660	LRRC4C	5'UTR	6	0.869475	0.13362	7.66201e-11	0.869475	0.13362	7.66201e-11	0.444009	1.23569	0.357839	0.742985	0.23077	1.30792	0.526309	0.509445	0.404309	0.694102	0.260579	1.41659	0.448688
cg25372290	11	45719244			6	1.04428	0.16811	5.23466e-10	1.04428	0.16811	5.23466e-10	0.895943	1.01153	0.40552	1.27012	0.30118	0.75097	0.601932	0.813792	0.47772	1.10834	0.330361	0.508548	0.711572
cg10519389	11	45725227			6	0.670941	0.111125	1.56309e-09	0.670941	0.111125	1.56309e-09	0.537584	0.541522	0.273254	0.873712	0.199624	0.303064	0.443708	0.775122	0.309503	0.751156	0.233244	0.199781	0.341139
cg20774552	11	46415316			6	0.653209	0.115444	1.52937e-08	0.646101	0.0981829	4.68604e-11	0.26113	0.882754	0.271426	0.819758	0.17609	0.872434	0.378545	0.773183	0.284826	0.262162	0.192131	0.510837	0.294664
cg18879828	11	46942432			6	0.577908	0.100883	1.01315e-08	0.577908	0.100883	1.01315e-08	0.621875	0.461248	0.242376	0.616287	0.171974	0.644387	0.412549	0.870274	0.284583	0.62175	0.219574	0.0787825	0.343837
cg00489660	11	57089821	TNKS1BP1	5'UTR	6	0.694405	0.127923	5.68941e-08	0.715742	0.106668	1.94635e-11	0.244328	0.721773	0.267734	1.07262	0.187211	0.409481	0.452686	0.632842	0.3302	0.372015	0.21837	0.638348	0.310341
cg08111960	11	59822765	MS4A3;MS4A3;MS4A3	TSS1500;TSS1500;TSS1500	6	0.720358	0.113465	2.17073e-10	0.720358	0.113465	2.17073e-10	0.65446	0.507764	0.312069	0.93043	0.193626	0.874602	0.401458	0.490462	0.315982	0.741658	0.23406	0.326798	0.399693
cg24825210	11	60552755	MS4A10	TSS200	5	0.850833	0.104681	4.36892e-16	0.850833	0.104681	4.36892e-16	0.808907	0.759507	0.262808	1.01272	0.167236	0.729332	0.391831	0.806215	0.315763	0.719006	0.202111	NA	NA
cg11231631	11	60553755	MS4A10	5'UTR	6	0.830171	0.13428	6.31306e-10	0.875595	0.0993963	1.26115e-18	0.138688	0.537357	0.245673	1.1492	0.178575	0.569641	0.385972	0.886407	0.351453	1.06791	0.199708	0.440725	0.273082
cg26980692	11	60719947	SLC15A3;SLC15A3	TSS1500;TSS1500	6	-0.803912	0.148855	6.63987e-08	-0.822896	0.120028	7.08747e-12	0.227783	-0.44972	0.369176	-0.934722	0.194371	-0.74111	0.516591	-1.39148	0.375518	-0.906797	0.251177	-0.231078	0.334878
cg02088673	11	61490404	DAGLA	Body	6	0.662968	0.119556	2.93492e-08	0.662968	0.119556	2.93492e-08	0.585696	0.600318	0.339324	0.918937	0.200628	0.474473	0.48688	0.822637	0.345157	0.418528	0.245676	0.344413	0.371332
cg08298827	11	62009585	SCGB1D2	TSS200	6	1.18445	0.189694	4.26526e-10	1.19601	0.176356	1.18704e-11	0.347919	0.937775	0.433744	1.75092	0.317631	1.47363	0.541496	0.886425	0.567999	0.803253	0.347808	0.792047	0.682134
cg19358520	11	62744209	SLC22A6;SLC22A6;SLC22A6;SLC22A6	3'UTR;3'UTR;3'UTR;3'UTR	6	1.04201	0.161398	1.07433e-10	1.05423	0.127264	1.19282e-16	0.208988	1.33257	0.385081	1.35363	0.210152	1.46935	0.538662	0.976308	0.428985	0.651028	0.251163	0.625086	0.362161
cg15832662	11	63448437	RTN3;RTN3;RTN3;RTN3	TSS1500;TSS1500;TSS1500;TSS1500	6	0.89189	0.145748	9.39194e-10	0.907815	0.114486	2.2e-15	0.199659	0.822072	0.337959	1.1563	0.189612	1.11673	0.416002	1.33181	0.402726	0.650325	0.233079	0.348598	0.326612
cg05766107	11	63702235			6	0.711872	0.0997899	9.76993e-13	0.711872	0.0997899	9.76993e-13	0.893006	0.655734	0.283185	0.791022	0.16967	0.36305	0.408049	0.912831	0.298023	0.674114	0.185223	0.547729	0.383433
cg10160630	11	64789409	ARL2	3'UTR	6	0.712786	0.11299	2.81945e-10	0.714649	0.0991057	5.55538e-13	0.30418	0.316225	0.243995	0.675833	0.167425	0.536438	0.566243	1.11871	0.29197	0.919045	0.197182	0.559161	0.337641
cg00509451	11	64811775	SAC3D1	Body	6	0.642941	0.114214	1.81e-08	0.647921	0.106892	1.34897e-09	0.357798	0.62289	0.319827	0.661185	0.176869	0.181135	0.436995	0.823081	0.30547	0.947603	0.232379	0.191361	0.297405
cg08931107	11	66103604	RIN1	Body	6	-0.661157	0.122811	7.30305e-08	-0.661157	0.122811	7.30305e-08	0.554784	-0.281548	0.330006	-0.781806	0.189383	-0.651462	0.61418	-0.978757	0.397934	-0.423905	0.253362	-1.0527	0.461559
cg14876517	11	66788192			6	0.733629	0.110148	2.73061e-11	0.733629	0.110148	2.73061e-11	0.42971	0.415552	0.282175	0.563579	0.201334	1.053	0.379811	0.968487	0.299613	0.957589	0.213214	0.427905	0.441723
cg09854615	11	69259788			6	1.03643	0.149565	4.2184e-12	1.03643	0.149565	4.2184e-12	0.532393	0.912902	0.391964	0.638319	0.270138	1.54253	0.6111	1.17892	0.400107	1.29515	0.306836	1.29249	0.449682
cg23740474	11	70455140	SHANK2;SHANK2	Body;Body	5	1.15329	0.212591	5.79709e-08	1.13213	0.172813	5.70788e-11	0.231317	2.05746	0.4382	0.968537	0.28227	0.709529	0.644757	1.1394	0.457626	0.923389	0.342079	NA	NA
cg23077606	11	70540206	SHANK2	Body	6	0.918164	0.170541	7.29186e-08	0.961763	0.117314	2.43968e-16	0.0881981	1.05721	0.307445	1.03455	0.201921	0.762142	0.430457	1.25714	0.34288	1.14952	0.244705	-0.0976523	0.379252
cg24006547	11	71259341	KRTAP5-9	TSS200	6	0.824119	0.145682	1.54053e-08	0.824119	0.145682	1.54053e-08	0.723022	0.912925	0.379017	0.967133	0.273123	0.655452	0.510062	0.941528	0.4085	0.906392	0.296304	0.185652	0.425422
cg16385335	11	71710614	IL18BP;IL18BP;IL18BP;IL18BP;IL18BP;IL18BP	TSS200;5'UTR;TSS1500;5'UTR;5'UTR;1stExon	6	0.976486	0.147143	3.21612e-11	0.973853	0.143648	1.20627e-11	0.393998	0.391658	0.38267	0.770066	0.249325	1.23398	0.475393	1.35897	0.392926	1.18695	0.300327	1.32409	0.53017
cg24987622	11	72288270	PDE2A;PDE2A;PDE2A;PDE2A	3'UTR;3'UTR;Body;3'UTR	6	0.834008	0.147046	1.41357e-08	0.865711	0.110163	3.8896e-15	0.149065	1.09448	0.314827	1.08438	0.192707	0.424228	0.44883	1.03567	0.331638	0.868196	0.223764	0.196373	0.296769
cg13912027	11	72759293	FCHSD2	Body	6	-0.581264	0.0909304	1.63297e-10	-0.581264	0.0909304	1.63297e-10	0.522013	-0.353822	0.232078	-0.644807	0.14496	-0.310097	0.442175	-0.723663	0.244863	-0.763938	0.208989	-0.188012	0.314668
cg04598420	11	75527994	UVRAG	Body	6	-0.315323	0.0523324	1.68695e-09	-0.315323	0.0523324	1.68695e-09	0.810062	-0.25787	0.15381	-0.300083	0.078721	-0.0842992	0.384671	-0.293447	0.218411	-0.430357	0.102027	-0.205466	0.162835
cg09108532	11	76481977			6	0.86502	0.159708	6.08612e-08	0.913605	0.105168	3.71858e-18	0.0819091	0.98822	0.316057	1.24044	0.17258	0.537944	0.587491	1.11945	0.302977	0.579449	0.207281	0.391396	0.32007
cg09143850	11	78386279	ODZ4	Body	6	0.682379	0.114018	2.1662e-09	0.682379	0.114018	2.1662e-09	0.772242	0.42275	0.278975	0.865325	0.199657	0.588535	0.380497	0.708201	0.333904	0.751036	0.241722	0.346871	0.408369
cg23214764	11	86511210	PRSS23	TSS1500	6	-0.498081	0.0858255	6.49778e-09	-0.498081	0.0858255	6.49778e-09	0.416128	-0.478947	0.310466	-0.642875	0.130554	-0.430798	0.405121	-0.629542	0.266848	-0.426304	0.18536	-0.0606106	0.239234
cg18395636	11	87908785	RAB38	TSS200	6	-1.58999	0.212479	7.26106e-14	-1.58999	0.212479	7.26106e-14	0.485773	-1.19376	0.535425	-1.55827	0.364723	-1.07838	0.737008	-2.75844	0.651836	-1.66675	0.444413	-1.28454	0.728123
cg01186595	11	89954679	CHORDC1;CHORDC1	Body;Body	6	0.731308	0.120151	1.15366e-09	0.731308	0.120151	1.15366e-09	0.505046	0.759238	0.271904	0.918161	0.219144	0.67699	0.435418	0.933779	0.364545	0.697818	0.264283	0.0872559	0.357968
cg15924285	11	93465688	SNORA8;SNORA1;SNORA32;SNORD6	TSS200;TSS1500;TSS1500;TSS1500	6	0.820678	0.147963	2.9143e-08	0.820678	0.147963	2.9143e-08	0.576889	0.848106	0.327525	0.877674	0.27396	1.69246	0.68539	0.791433	0.445511	0.905162	0.319846	0.237734	0.405263
cg23507834	11	93824553	HEPHL1	Body	5	0.779329	0.119216	6.27231e-11	0.779329	0.119216	6.27231e-11	0.616801	0.761428	0.297979	0.979487	0.194749	0.744849	0.376441	0.362264	0.340723	0.70665	0.242101	NA	NA
cg06095802	11	102843294			6	0.725805	0.127926	1.39794e-08	0.725805	0.127926	1.39794e-08	0.573224	0.799824	0.28767	0.823444	0.224726	0.974415	0.495024	0.321415	0.357573	0.948353	0.302673	0.24028	0.39519
cg02534164	11	109930823			6	0.814061	0.126936	1.42547e-10	0.824443	0.115975	1.17052e-12	0.331593	0.600977	0.271962	1.13145	0.20092	1.14367	0.521729	0.95454	0.365114	0.660629	0.260195	0.397891	0.314491
cg03009690	11	113650479	CLDN25	TSS200	6	0.960844	0.136685	2.0711e-12	0.960844	0.136685	2.0711e-12	0.798253	0.516613	0.383482	1.08258	0.204077	0.801352	0.538414	1.06048	0.413797	1.07875	0.315429	0.629149	0.544458
cg19642168	11	117707850	FXYD6;FXYD6;FXYD6;FXYD6;FXYD6	3'UTR;3'UTR;3'UTR;3'UTR;3'UTR	5	0.963756	0.143413	1.81537e-11	0.963756	0.143413	1.81537e-11	0.571553	0.895419	0.379913	1.1354	0.229107	0.102414	0.653334	1.16375	0.388949	0.810294	0.270287	NA	NA
cg18728264	11	118766491	CXCR5;CXCR5;CXCR5	1stExon;3'UTR;3'UTR	6	0.742339	0.117383	2.54733e-10	0.742339	0.117383	2.54733e-10	0.599793	0.854132	0.311218	0.894935	0.205684	0.534753	0.427632	0.212764	0.324821	0.797179	0.227316	0.819265	0.481411
cg11466837	11	120009682	TRIM29	TSS1500	6	0.614307	0.0951202	1.05942e-10	0.614307	0.0951202	1.05942e-10	0.598579	0.485091	0.246103	0.752219	0.170601	0.102799	0.317688	0.673167	0.30086	0.677783	0.198781	0.629721	0.273278
cg21886186	11	120106598			6	0.707073	0.125829	1.91736e-08	0.707073	0.125829	1.91736e-08	0.536243	0.686645	0.334652	0.922637	0.214925	1.02822	0.430188	0.794546	0.396128	0.315621	0.253242	0.577937	0.438019
cg04919489	11	120283690	ARHGEF12	Body	6	0.640209	0.104746	9.83931e-10	0.640209	0.104746	9.83931e-10	0.878796	0.651349	0.231016	0.638914	0.196285	0.559837	0.397801	0.986808	0.304301	0.549278	0.222187	0.467388	0.33196
cg17638507	11	122282870			6	0.942106	0.169041	2.50063e-08	0.937651	0.157122	2.40669e-09	0.339982	0.659305	0.392491	1.13066	0.292041	1.43913	0.468868	1.29902	0.460087	0.367405	0.336088	1.08269	0.490038
cg02589353	11	124471596			5	1.16296	0.180648	1.21266e-10	1.20635	0.130964	3.22298e-20	0.164833	0.968042	0.303422	1.55185	0.202647	1.4388	0.448598	0.746437	0.596374	0.834885	0.255577	NA	NA
cg17410660	11	124806508	HEPACAM	TSS1500	6	0.679368	0.0971378	2.67433e-12	0.679368	0.0971378	2.67433e-12	0.755089	0.54581	0.248577	0.902218	0.174964	0.753189	0.353841	0.5291	0.26431	0.575342	0.203185	0.581583	0.307061
cg09913813	11	126573785	KIRREL3;KIRREL3	Body;Body	6	0.665838	0.118792	2.08186e-08	0.665838	0.118792	2.08186e-08	0.841259	0.803692	0.30386	0.694043	0.205756	0.384572	0.398085	0.429055	0.343623	0.856755	0.253954	0.447241	0.403992
cg20051949	11	126619800	KIRREL3;KIRREL3	Body;Body	6	0.838417	0.125026	2.00091e-11	0.845041	0.120305	2.15379e-12	0.378102	0.946622	0.313255	1.13898	0.213565	0.49747	0.360152	0.904076	0.38917	0.785477	0.261729	0.30942	0.352095
cg17459660	11	130392553			5	0.684315	0.0999433	7.53953e-12	0.684315	0.0999433	7.53953e-12	0.665469	0.629225	0.263157	0.60238	0.172942	0.625901	0.321732	0.491017	0.270469	0.91753	0.185991	NA	NA
cg10759648	11	132374480	OPCML;OPCML	Body;Body	5	0.810568	0.132606	9.80182e-10	0.819169	0.123841	3.72342e-11	0.347324	0.618314	0.278292	1.18892	0.215495	0.693689	0.458506	0.574072	0.352187	0.663309	0.236107	NA	NA
cg02787737	11	133928346			6	1.51244	0.18171	8.54977e-17	1.51244	0.18171	8.54977e-17	0.417802	1.64968	0.453973	1.72024	0.309032	0.695485	0.566588	1.37498	0.54678	1.23145	0.396042	2.43105	0.685622
cg00517261	12	323801	SLC6A12;SLC6A12;SLC6A12	TSS1500;TSS1500;TSS1500	6	0.726841	0.132035	3.69359e-08	0.726188	0.116845	5.13326e-10	0.305237	1.16437	0.332328	0.854727	0.202437	1.06653	0.392325	0.599545	0.429285	0.490654	0.226379	0.243472	0.346007
cg06823681	12	324682	SLC6A12	TSS1500	6	0.739437	0.136362	5.87301e-08	0.770876	0.115407	2.39548e-11	0.252242	0.640814	0.294132	0.997291	0.207429	0.32633	0.365368	0.840182	0.340642	0.954471	0.235332	0.0610975	0.404351
cg00522935	12	1964603	CACNA2D4	Body	5	0.808182	0.125333	1.13115e-10	0.808182	0.125333	1.13115e-10	0.717113	0.659029	0.286765	0.777524	0.209406	0.603153	0.435187	1.27245	0.368713	0.819422	0.249534	NA	NA
cg01833890	12	2564063	CACNA1C;CACNA1C;CACNA1C;CACNA1C;CACNA1C;CACNA1C;CACNA1C;CACNA1C;CACNA1C;CACNA1C;CACNA1C;CACNA1C;CACNA1C;CACNA1C;CACNA1C;CACNA1C;CACNA1C;CACNA1C;CACNA1C;CACNA1C;CACNA1C;CACNA1C;CACNA1C	Body;Body;Body;Body;Body;Body;Body;Body;Body;Body;Body;Body;Body;Body;Body;Body;Body;Body;Body;Body;Body;Body;Body	6	0.499096	0.0759181	4.8936e-11	0.499096	0.0759181	4.8936e-11	0.675674	0.431718	0.191114	0.422456	0.122502	0.646439	0.347313	0.821751	0.212326	0.49328	0.158977	0.372464	0.325305
cg16733267	12	3584702			6	0.728576	0.136263	8.94973e-08	0.728576	0.136263	8.94973e-08	0.477239	0.274573	0.314794	0.861876	0.240274	0.17847	0.50709	0.994716	0.415754	0.867022	0.282426	0.997014	0.486009
cg17062268	12	5353230			6	0.878024	0.0956222	4.22324e-20	0.878024	0.0956222	4.22324e-20	0.43896	0.642519	0.258887	0.858219	0.166781	1.12099	0.366374	0.767019	0.284123	1.16156	0.193138	0.556482	0.2905
cg23363039	12	6056642	ANO2	TSS1500	6	0.75186	0.13798	5.06391e-08	0.769148	0.124446	6.38645e-10	0.324802	1.06837	0.323403	1.0555	0.210688	0.283064	0.545162	0.591825	0.373365	0.540394	0.252224	0.317992	0.400806
cg26244013	12	6470176	SCNN1A;SCNN1A;SCNN1A	Body;Body;Body	6	1.02946	0.165887	5.4429e-10	1.0331	0.128766	1.03128e-15	0.176412	0.981653	0.370892	1.29205	0.224773	0.956732	0.501836	1.73262	0.40458	0.638416	0.27163	0.682357	0.322486
cg21416544	12	8986988	A2ML1	Body	6	0.919342	0.150078	9.02618e-10	0.919342	0.150078	9.02618e-10	0.895363	0.87264	0.384368	0.947597	0.259041	1.46929	0.654647	0.90971	0.500727	0.986188	0.297664	0.508261	0.441996
cg22677100	12	15938047	EPS8	5'UTR	5	0.728417	0.129869	2.03669e-08	0.728417	0.129869	2.03669e-08	0.973534	0.566534	0.286035	0.72359	0.215192	0.786238	0.527194	0.835679	0.348283	0.801082	0.270847	NA	NA
cg23395692	12	23119040			6	0.60358	0.0943607	1.58955e-10	0.60501	0.0935106	9.80322e-11	0.407905	0.381912	0.227179	0.866216	0.160903	0.524228	0.357263	0.603649	0.274521	0.545392	0.198061	0.236725	0.320035
cg06640997	12	32081573			6	0.850021	0.143553	3.19382e-09	0.855018	0.139596	9.0717e-10	0.390872	0.666565	0.324233	1.13118	0.241226	1.23157	0.525661	0.56832	0.455302	0.915459	0.298995	0.131727	0.447673
cg15460921	12	50819810	LARP4;LARP4;LARP4;LARP4;LARP4;LARP4;LARP4	Body;Body;Body;Body;Body;Body;Body	6	0.644553	0.0856812	5.36595e-14	0.644553	0.0856812	5.36595e-14	0.619775	0.505812	0.245348	0.829733	0.144097	0.308845	0.397516	0.418144	0.252154	0.613315	0.173449	0.651379	0.248857
cg20306694	12	51718251	BIN2	TSS1500	6	0.89874	0.15887	1.53966e-08	0.89874	0.15887	1.53966e-08	0.446316	1.04564	0.486525	1.2536	0.278909	1.15075	0.457863	0.850367	0.52164	0.467782	0.337675	0.442969	0.433337
cg24926042	12	52799999	KRT82	1stExon	6	0.755681	0.109525	5.21355e-12	0.761813	0.105007	4.0211e-13	0.378644	0.34798	0.289965	1.03513	0.184814	0.519264	0.402145	0.913386	0.308116	0.707879	0.202097	0.538663	0.346717
cg00028929	12	52908478	KRT5	3'UTR	6	0.866496	0.14949	6.77691e-09	0.866496	0.14949	6.77691e-09	0.416638	1.40657	0.391792	1.00589	0.265517	0.179492	0.44594	0.660138	0.490733	0.861045	0.314615	0.629568	0.458095
cg08352148	12	52948345	KRT71	TSS1500	6	0.676242	0.104821	1.10835e-10	0.676242	0.104821	1.10835e-10	0.565232	0.609209	0.246206	0.886115	0.190764	0.821796	0.401855	0.469016	0.302199	0.472435	0.196953	1.15273	0.492999
cg23295636	12	54494573	FLJ12825;LOC100240734	Body;TSS1500	6	0.904537	0.167353	6.48204e-08	0.904537	0.167353	6.48204e-08	0.871681	0.567617	0.425194	0.762432	0.299374	1.37921	0.625456	1.18028	0.515331	0.988778	0.314852	1.03787	0.619325
cg16237191	12	55945613	OR6C4	1stExon	6	1.02704	0.187711	4.46543e-08	1.04333	0.140049	9.35067e-14	0.150739	1.03461	0.318143	1.50094	0.247478	0.86625	0.486325	1.19303	0.515863	0.447949	0.28232	1.10704	0.485364
cg05225089	12	57595554	LRP1	Body	6	0.519041	0.0939466	3.29772e-08	0.519041	0.0939466	3.29772e-08	0.503207	0.126629	0.283514	0.612906	0.153238	0.303516	0.33178	0.838564	0.262936	0.490172	0.198438	0.406944	0.32736
cg08163918	12	57628654	SHMT2;SHMT2;SHMT2;SHMT2;SHMT2;SHMT2;SHMT2;SHMT2	3'UTR;Body;3'UTR;3'UTR;3'UTR;Body;3'UTR;Body	6	-0.556157	0.0969908	9.80227e-09	-0.556414	0.0948906	4.52548e-09	0.396716	-0.756833	0.243154	-0.630336	0.160864	-0.322992	0.402897	-0.995158	0.339945	-0.448031	0.219819	-0.238193	0.223649
cg08134678	12	57872430	ARHGAP9;ARHGAP9;ARHGAP9	Body;Body;TSS1500	6	0.915123	0.142287	1.26342e-10	0.915123	0.142287	1.26342e-10	0.449586	0.771495	0.35516	1.18513	0.248469	0.592142	0.488166	0.741263	0.447096	1.12072	0.297638	0.218422	0.457363
cg04036049	12	57923710	MBD6	3'UTR	6	0.814496	0.149285	4.87031e-08	0.814496	0.149285	4.87031e-08	0.734828	0.99004	0.451503	0.804441	0.257985	1.45643	0.694276	0.902182	0.409858	0.473257	0.293488	1.07807	0.434226
cg09183316	12	58238232	CTDSP2	Body	6	-0.64435	0.113319	1.2993e-08	-0.631214	0.0992757	2.0414e-10	0.306552	-1.20832	0.30608	-0.548923	0.15474	-0.818533	0.398076	-0.799265	0.304068	-0.559291	0.224573	-0.275295	0.287805
cg15398255	12	63195954	PPM1H	Body	6	0.480732	0.0805161	2.36335e-09	0.480732	0.0805161	2.36335e-09	0.501171	0.723987	0.23375	0.586715	0.134702	0.324197	0.270773	0.343967	0.253493	0.259854	0.166222	0.607926	0.254451
cg25488990	12	65668614			6	0.899506	0.156504	9.05666e-09	0.909359	0.124558	2.86249e-13	0.19356	1.45689	0.296942	0.762295	0.224602	0.864994	0.447791	0.694484	0.388787	1.09459	0.260843	0.2837	0.378212
cg07269374	12	66176707	RPSAP52	Body	5	0.834254	0.142752	5.09337e-09	0.854966	0.125881	1.10681e-11	0.308748	0.875444	0.283852	1.14922	0.198442	0.765716	0.496471	0.476251	0.414153	0.520471	0.254698	NA	NA
cg19160624	12	68221623			6	0.827082	0.124452	3.01578e-11	0.827082	0.124452	3.01578e-11	0.503671	0.892537	0.327772	1.15272	0.224272	0.353706	0.382779	0.79809	0.361996	0.639384	0.258705	0.688747	0.409001
cg07817608	12	76219528			5	0.544871	0.097935	2.64271e-08	0.544871	0.097935	2.64271e-08	0.729678	0.662579	0.246069	0.641068	0.163049	0.137273	0.353377	0.485826	0.290113	0.492068	0.181843	NA	NA
cg27365701	12	89744150	DUSP6;DUSP6	Body;Body	6	-0.891172	0.162022	3.79101e-08	-0.891172	0.162022	3.79101e-08	0.457663	-0.461174	0.425638	-1.12771	0.276772	-1.35161	0.648494	-1.11105	0.478384	-0.923483	0.342162	-0.171158	0.486187
cg09631880	12	94213192	CRADD	Body	6	0.758833	0.139073	4.86005e-08	0.761984	0.124382	9.00201e-10	0.30815	0.920444	0.316836	1.02169	0.218723	0.785432	0.402553	0.857663	0.440179	0.223282	0.260982	0.79595	0.358998
cg10118167	12	94676545	PLXNC1	Body	6	0.54984	0.0992042	2.98171e-08	0.54984	0.0992042	2.98171e-08	0.45798	0.749248	0.236061	0.623908	0.160615	0.196357	0.371676	0.183994	0.33251	0.644822	0.207816	0.0407521	0.427842
cg04822495	12	94676688	PLXNC1	Body	6	0.780051	0.144218	6.34393e-08	0.780477	0.117551	3.14852e-11	0.225206	1.15878	0.334574	0.908663	0.197169	0.58392	0.424579	1.29756	0.42023	0.62254	0.268725	0.280406	0.281126
cg09627247	12	101113984			6	0.944909	0.14603	9.75786e-11	0.944909	0.14603	9.75786e-11	0.69581	1.05268	0.376615	0.77317	0.256039	0.603077	0.451016	0.691782	0.447857	1.295	0.291947	1.18006	0.581701
cg27663938	12	103696381	C12orf42;C12orf42	Body;Body	6	-1.1298	0.18116	4.47556e-10	-1.1298	0.18116	4.47556e-10	0.535713	-1.59462	0.475024	-1.2564	0.289793	-1.82063	0.725564	-0.584572	0.626277	-0.738207	0.3768	-0.852524	0.615625
cg11010909	12	103980767	STAB2	TSS1500	6	0.60225	0.0926049	7.85045e-11	0.60225	0.0926049	7.85045e-11	0.948165	0.491419	0.225554	0.56599	0.183849	0.745401	0.321073	0.791993	0.244163	0.593829	0.197033	0.52936	0.25705
cg21605781	12	105630720	APPL2	TSS1500	6	0.876763	0.159282	3.70303e-08	0.876763	0.159282	3.70303e-08	0.695548	1.44355	0.40759	0.92647	0.271686	0.622657	0.668821	0.819445	0.512355	0.700486	0.325923	0.503297	0.477313
cg19061112	12	106491043	NUAK1	Body	6	0.581729	0.0939263	5.88559e-10	0.581729	0.0939263	5.88559e-10	0.509221	0.423711	0.241262	0.778967	0.16241	0.271583	0.34429	0.628455	0.295125	0.655964	0.203502	0.266445	0.26542
cg04944536	12	116756890			6	0.746513	0.122192	1.00033e-09	0.746513	0.122192	1.00033e-09	0.449211	0.428902	0.326657	0.619564	0.219291	0.643629	0.382895	0.517251	0.365483	1.15203	0.253352	0.994518	0.380078
cg16301036	12	118808298	TAOK3	5'UTR	6	-1.05395	0.183754	9.71174e-09	-1.05395	0.183754	9.71174e-09	0.610287	-1.05286	0.445026	-1.25836	0.325573	-0.635947	0.658	-0.967437	0.628096	-1.37605	0.392788	-0.311601	0.512552
cg00293381	12	121177413	ACADS	3'UTR	5	0.580476	0.0923501	3.26596e-10	0.580476	0.0923501	3.26596e-10	0.951896	0.538701	0.26452	0.51547	0.142241	0.808861	0.397722	0.608299	0.242172	0.643194	0.18208	NA	NA
cg13889620	12	122092201	MORN3	Body	6	0.660188	0.114253	7.5465e-09	0.660188	0.114253	7.5465e-09	0.531373	0.811076	0.310733	0.80837	0.193161	0.362587	0.40527	0.166869	0.329413	0.77546	0.234101	0.443203	0.411807
cg04255937	12	122269675	SETD1B	3'UTR	6	0.735236	0.130386	1.71132e-08	0.735236	0.130386	1.71132e-08	0.721009	1.0155	0.364138	0.611905	0.234375	0.916717	0.476304	1.09955	0.376147	0.679722	0.259657	0.377662	0.384393
cg23021584	12	124876101	NCOR2;NCOR2	Body;Body	6	-0.666968	0.121214	3.74603e-08	-0.666968	0.121214	3.74603e-08	0.482101	-0.695469	0.317534	-0.861332	0.205017	-0.274231	0.510891	-0.653789	0.3486	-0.765714	0.26304	-0.0646864	0.35718
cg04461678	12	127769663			6	0.778595	0.131266	3.00291e-09	0.778595	0.131266	3.00291e-09	0.63054	0.706521	0.32226	0.721049	0.216437	-0.392382	1.15368	0.426547	0.386667	1.08298	0.256239	0.897281	0.477297
cg15985905	12	128078475			6	1.04156	0.180124	7.36196e-09	1.11748	0.125555	5.56754e-19	0.0919384	0.93842	0.317745	1.48616	0.227838	1.20588	0.418194	0.318485	0.441125	1.29615	0.251895	0.523457	0.361567
cg13928566	12	130624596			6	0.925672	0.151076	8.94382e-10	0.925672	0.151076	8.94382e-10	0.696172	1.01451	0.40294	1.01004	0.25698	1.45823	0.632751	0.987085	0.409256	0.8376	0.303814	0.125855	0.558152
cg05939560	12	131003775	RIMBP2	TSS1500	6	1.02541	0.18579	3.40616e-08	1.02541	0.18579	3.40616e-08	0.579782	1.60426	0.444179	1.1298	0.32793	1.31652	0.673156	0.564158	0.558634	0.644241	0.362615	0.918029	0.793939
cg05061501	12	131258419			6	-0.551314	0.0946312	5.67996e-09	-0.551314	0.0946312	5.67996e-09	0.579889	-0.904426	0.264242	-0.640612	0.167112	-0.745668	0.441637	-0.376189	0.288026	-0.4007	0.195094	-0.375293	0.235152
cg25898076	12	131559071	GPR133	Body	6	0.809936	0.143099	1.51407e-08	0.809936	0.143099	1.51407e-08	0.57893	0.99078	0.371429	1.08296	0.24799	0.84187	0.535854	0.264534	0.417772	0.693819	0.28016	0.437163	0.544523
cg17034959	12	132321329	MMP17	Body	6	0.726801	0.131441	3.21154e-08	0.726801	0.131441	3.21154e-08	0.953291	0.410662	0.381345	0.841926	0.23794	0.707014	0.384961	0.610369	0.359624	0.778196	0.263378	0.824276	0.474257
cg01852522	12	132686912	GALNT9;GALNT9	Body;Body	6	0.767178	0.142995	8.09138e-08	0.767178	0.142995	8.09138e-08	0.804046	0.637045	0.385121	0.976453	0.242312	0.529659	0.431988	0.798821	0.458392	0.811402	0.298286	0.221053	0.514672
cg09676630	12	133101224	FBRSL1	Body	6	0.71992	0.110993	8.80582e-11	0.71992	0.110993	8.80582e-11	0.649674	0.506922	0.346381	0.745402	0.190652	0.165702	0.393039	0.98949	0.33479	0.844618	0.230096	0.711004	0.300933
cg11229975	13	23504125			6	0.884302	0.130596	1.27661e-11	0.884302	0.130596	1.27661e-11	0.653459	0.705778	0.308203	0.742035	0.265154	0.477416	0.397053	1.09125	0.340167	1.09566	0.260544	1.26409	0.48998
cg19014607	13	25209505			6	0.88959	0.159888	2.63894e-08	0.88959	0.159888	2.63894e-08	0.653162	0.656534	0.379468	1.22313	0.305601	0.689733	0.482058	0.252007	0.557589	1.03555	0.320939	0.781196	0.48582
cg16639691	13	28597227	FLT3	Body	6	1.2238	0.171393	9.31159e-13	1.2503	0.14686	1.68678e-17	0.277846	1.69904	0.386485	1.52001	0.248724	1.15163	0.581136	0.8431	0.487103	1.0988	0.292034	0.473009	0.466007
cg18520125	13	28903926	FLT1	Body	6	1.14682	0.154652	1.21172e-13	1.14682	0.154652	1.21172e-13	0.541513	0.911391	0.445564	1.00458	0.290681	0.595698	0.428777	1.48827	0.496137	1.37337	0.318466	1.54957	0.423446
cg09807856	13	30523044			6	0.456752	0.0853339	8.6733e-08	0.456752	0.0853339	8.6733e-08	0.786081	0.351139	0.21704	0.503619	0.151522	0.384342	0.292774	0.721017	0.266129	0.509477	0.186654	0.224164	0.23535
cg24690437	13	31480273	C13orf33	TSS200	6	0.746409	0.131351	1.3269e-08	0.746409	0.131351	1.3269e-08	0.680658	1.00148	0.334881	0.696041	0.226805	0.160184	0.441484	0.904416	0.377547	0.870348	0.268615	0.436896	0.527155
cg12491368	13	32523340	EEF1DP3	Body	6	0.567578	0.0980913	7.19873e-09	0.574517	0.0863902	2.92598e-11	0.289657	0.762335	0.207322	0.700264	0.154766	0.492097	0.319664	0.777606	0.252332	0.388738	0.187699	0.128831	0.25735
cg10288525	13	33455187			6	0.754942	0.140388	7.55152e-08	0.754942	0.140388	7.55152e-08	0.45152	1.01088	0.380364	0.977893	0.250917	0.685487	0.481012	-0.0788451	0.45432	0.733004	0.280869	0.641432	0.404882
cg20901032	13	37680691	CSNK1A1L	TSS1500	6	0.62965	0.109611	9.22479e-09	0.62965	0.109611	9.22479e-09	0.721438	0.605751	0.26576	0.730554	0.204209	0.716315	0.333401	0.94936	0.310879	0.401125	0.247822	0.371071	0.324999
cg09750084	13	49005868	LPAR6;RB1	5'UTR;Body	6	-0.873914	0.145566	1.93047e-09	-0.873914	0.145566	1.93047e-09	0.560643	-0.900439	0.373839	-1.12124	0.248118	-0.186094	0.512803	-0.792253	0.406241	-0.951477	0.310256	-0.336934	0.531244
cg25522046	13	51855413	FAM124A	3'UTR	6	0.76078	0.131577	7.38138e-09	0.788631	0.103453	2.47714e-14	0.192879	0.615005	0.274947	0.991494	0.183561	0.105658	0.45804	1.19477	0.328698	0.818972	0.203232	0.385066	0.28518
cg01899581	13	60733965	DIAPH3	Body	6	-0.881832	0.144642	1.08301e-09	-0.881832	0.144642	1.08301e-09	0.553521	-0.930013	0.345927	-0.605521	0.250956	-1.39579	0.594036	-1.45209	0.420531	-0.893566	0.306974	-0.697904	0.473355
cg11582226	13	77587296	FBXL3	Body	6	0.702005	0.122329	9.54387e-09	0.71044	0.115181	6.91408e-10	0.356373	0.616732	0.289516	1.07043	0.205637	0.855508	0.391035	0.564364	0.355367	0.427307	0.249944	0.425973	0.327333
cg00012576	13	94568320	GPC6	Body	6	0.864395	0.157952	4.43715e-08	0.896253	0.120785	1.16925e-13	0.167992	0.599026	0.318523	1.0979	0.20691	0.417716	0.46826	1.49355	0.388783	0.957692	0.250243	0.342687	0.349544
cg00777315	13	95133339	DCT;DCT	TSS1500;TSS1500	6	0.673156	0.120884	2.56772e-08	0.673156	0.120884	2.56772e-08	0.455716	0.637341	0.325776	1.03941	0.215909	0.578308	0.41508	0.540506	0.375557	0.484902	0.250073	0.32521	0.339544
cg16941122	13	99965936	UBAC2;UBAC2;UBAC2	Body;Body;Body	6	1.24227	0.136186	7.38184e-20	1.24227	0.136186	7.38184e-20	0.438798	1.05027	0.357091	1.56902	0.248895	1.03	0.539024	1.44411	0.371851	1.18715	0.276319	0.629565	0.402825
cg27130075	13	110935325	COL4A1	Body	6	0.743138	0.117547	2.58107e-10	0.743138	0.117547	2.58107e-10	0.589144	0.716714	0.2829	0.995928	0.210632	1.06215	0.419524	0.566018	0.314592	0.469875	0.247727	0.564757	0.436133
cg19520280	13	111032155	COL4A2	Body	6	0.757199	0.140635	7.27831e-08	0.757199	0.140635	7.27831e-08	0.516973	0.495618	0.391855	0.566712	0.25552	0.924277	0.419653	1.09675	0.368659	1.02192	0.283942	0.116578	0.551081
cg20450058	13	111152708	COL4A2	Body	6	0.732115	0.10802	1.2219e-11	0.732115	0.10802	1.2219e-11	0.768818	0.66863	0.258698	0.918067	0.191093	0.64448	0.389813	0.91703	0.318751	0.490507	0.24269	0.603293	0.316642
cg10435235	13	111956623	ARHGEF7;ARHGEF7	3'UTR;3'UTR	6	0.6543	0.120008	4.9773e-08	0.654266	0.108791	1.81059e-09	0.316762	0.708863	0.278646	0.772373	0.19485	0.49477	0.339108	1.27943	0.348252	0.36915	0.237265	0.416083	0.307621
cg03357721	13	111956695	ARHGEF7;ARHGEF7	3'UTR;3'UTR	6	0.61422	0.108442	1.47842e-08	0.61422	0.108442	1.47842e-08	0.628837	0.550453	0.284153	0.852408	0.1872	0.378291	0.412474	0.691448	0.372413	0.344204	0.226293	0.622539	0.294887
cg22032900	13	113301782	C13orf35;C13orf35	1stExon;5'UTR	6	0.610318	0.109559	2.53769e-08	0.610318	0.109559	2.53769e-08	0.817137	0.468903	0.276816	0.672142	0.210824	0.602957	0.311019	0.98667	0.335258	0.436184	0.227554	0.669474	0.329422
cg08610076	13	114890016	RASA3	Body	6	0.690794	0.11122	5.26267e-10	0.690794	0.11122	5.26267e-10	0.748449	0.748614	0.28713	0.499164	0.196002	1.15256	0.416307	0.660442	0.343073	0.832499	0.229575	0.60519	0.325439
cg23260578	14	20978830	RNASE10	1stExon	6	0.782709	0.131901	2.95505e-09	0.777261	0.119006	6.52225e-11	0.316472	1.28779	0.321627	0.643704	0.21528	0.193453	0.40674	1.12799	0.372789	0.745343	0.234404	0.718263	0.355237
cg00478884	14	20978888	RNASE10	1stExon	6	0.780375	0.139636	2.28875e-08	0.780375	0.139636	2.28875e-08	0.854384	0.733206	0.398404	0.758788	0.254926	0.244011	0.489252	1.18381	0.492982	0.840084	0.255962	0.829806	0.406792
cg12940993	14	21271148	RNASE1;RNASE1;RNASE1;RNASE1	TSS200;TSS200;TSS1500;TSS200	6	0.772422	0.140724	4.04399e-08	0.758769	0.131067	7.07427e-09	0.351093	1.05967	0.372123	0.5707	0.22436	1.6404	0.482728	0.594389	0.426684	0.566393	0.271073	0.927025	0.359648
cg01906637	14	21504131	RNASE13	TSS1500	6	0.568184	0.104203	4.9623e-08	0.568204	0.104183	4.92796e-08	0.415706	0.556515	0.300896	0.906249	0.188478	0.416742	0.382172	0.471252	0.33579	0.344023	0.204301	0.408423	0.2746
cg14177925	14	22465676			6	1.02366	0.187861	5.06447e-08	0.985471	0.125188	3.49288e-15	0.0919499	1.53977	0.387981	0.880192	0.207564	1.72985	0.650417	0.783529	0.517064	1.30464	0.254637	0.408853	0.283679
cg03508235	14	23445994	JUB;JUB;JUB	5'UTR;Body;1stExon	6	0.671678	0.113838	3.62884e-09	0.672838	0.111708	1.71045e-09	0.398739	0.549508	0.289085	0.895329	0.197138	0.495572	0.432901	1.12063	0.341412	0.434308	0.225298	0.395642	0.336664
cg05877109	14	23775794	BCL2L2	TSS1500	6	-0.540369	0.0977602	3.24833e-08	-0.540369	0.0977602	3.24833e-08	0.787219	-0.320785	0.322408	-0.699046	0.15779	-0.360607	0.306035	-0.376207	0.34586	-0.433255	0.214205	-0.637774	0.267079
cg10359332	14	32835247	AKAP6	5'UTR	6	0.595987	0.0961776	5.76465e-10	0.595987	0.0961776	5.76465e-10	0.840123	0.421874	0.24271	0.621811	0.163843	0.711866	0.449818	0.862826	0.294825	0.634615	0.196898	0.368705	0.293124
cg20448706	14	32941841	AKAP6	Body	6	0.846102	0.13259	1.75527e-10	0.846102	0.13259	1.75527e-10	0.559637	0.820998	0.35599	1.04775	0.220395	0.972981	0.46479	0.669071	0.397692	0.820062	0.266035	-0.0725532	0.548514
cg23629393	14	47908980	MDGA2	Body	6	0.786636	0.129933	1.41127e-09	0.809204	0.0994505	4.06014e-16	0.160205	0.821433	0.239164	1.07287	0.174771	1.02121	0.364774	0.927242	0.304314	0.577197	0.218746	0.221158	0.292672
cg10515048	14	50697283	SOS2	Body	6	-0.349598	0.0570826	9.10124e-10	-0.349598	0.0570826	9.10124e-10	0.441438	-0.117374	0.167659	-0.453765	0.0860611	-0.192148	0.216936	-0.426905	0.168595	-0.241833	0.134041	-0.3835	0.203205
cg04368094	14	56586522	PELI2	Body	6	-0.658629	0.120813	4.99127e-08	-0.659703	0.109024	1.43957e-09	0.323123	-0.256723	0.262361	-0.783643	0.185697	-0.696595	0.36988	-1.2248	0.343819	-0.545014	0.228749	-0.555223	0.417974
cg22797773	14	65239943	SPTB;SPTB	Body;Body	6	0.83142	0.15295	5.45219e-08	0.83142	0.15295	5.45219e-08	0.792421	0.53266	0.427316	1.00703	0.274901	1.20081	0.484234	1.0104	0.450825	0.676847	0.320606	0.511385	0.44178
cg08264895	14	70060335			5	1.14123	0.167299	9.01094e-12	1.16365	0.115811	9.38924e-24	0.117922	1.0356	0.29533	1.502	0.189878	0.945409	0.475268	1.34404	0.325621	0.76123	0.215674	NA	NA
cg01557792	14	70162755	KIAA0247	Body	6	-0.904143	0.10835	7.1423e-17	-0.912405	0.0925845	6.5321e-23	0.276041	-0.527179	0.254742	-0.976238	0.149771	-0.772473	0.384892	-1.37781	0.270785	-0.947807	0.208286	-0.675994	0.274915
cg18653195	14	70445813	SMOC1;SMOC1	Body;Body	6	0.688089	0.119431	8.34204e-09	0.689214	0.0992596	3.82372e-12	0.261188	0.940521	0.251374	0.819179	0.167428	1.17284	0.390615	0.411528	0.305474	0.447271	0.187425	0.238657	0.484452
cg19805668	14	75418675	PGF	Body	6	0.790166	0.137378	8.83148e-09	0.790166	0.137378	8.83148e-09	0.837404	1.10867	0.365595	0.773712	0.248794	0.706577	0.367618	0.883891	0.394098	0.536986	0.281771	1.16286	0.585598
cg26279183	14	75665683			6	1.07452	0.146063	1.88761e-13	1.07569	0.120782	5.28732e-19	0.236918	1.17374	0.322323	1.22011	0.213619	0.780904	0.462051	1.70166	0.34887	0.774185	0.23742	0.679647	0.39628
cg18712349	14	85214861			6	0.51898	0.0933011	2.66062e-08	0.51898	0.0933011	2.66062e-08	0.494026	0.405155	0.23056	0.673018	0.164478	0.918385	0.343841	0.558272	0.291614	0.419374	0.20512	0.186462	0.257224
cg20566484	14	94489832			5	0.765462	0.119506	1.50173e-10	0.765462	0.119506	1.50173e-10	0.702673	0.479436	0.278792	0.916812	0.197652	1.0849	0.513699	0.79205	0.327743	0.675943	0.232768	NA	NA
cg01714756	14	94780400	SERPINA6	Body	6	0.696752	0.126435	3.57267e-08	0.714837	0.110592	1.02159e-10	0.288678	0.256673	0.295795	0.969575	0.19465	0.383725	0.417561	1.0285	0.322987	0.686729	0.222889	0.475855	0.343215
cg23117999	14	96508302	C14orf132	Body	6	0.679855	0.111449	1.05989e-09	0.687332	0.10452	4.83073e-11	0.361594	0.669652	0.261031	0.79479	0.186523	1.14588	0.568722	0.151628	0.308508	0.83764	0.193898	0.357045	0.355302
cg18885766	14	100012203	CCDC85C	Body	6	0.936785	0.157192	2.53007e-09	0.936785	0.157192	2.53007e-09	0.436446	1.53475	0.40898	0.789411	0.284353	1.53527	0.64237	1.16728	0.456812	0.684259	0.297991	0.535577	0.523598
cg06961429	14	101493361	MIR329-2	TSS200	6	0.720081	0.122695	4.38798e-09	0.720081	0.122695	4.38798e-09	0.615056	0.376941	0.312161	0.843166	0.212314	1.13826	0.334273	0.509227	0.359261	0.64619	0.255758	0.625696	0.707882
cg05348084	14	101506819	MIR376B;MIR300;MIR376A1	Body;TSS1500;TSS1500	6	0.612559	0.092109	2.92359e-11	0.612559	0.092109	2.92359e-11	0.587843	0.515754	0.276693	0.760566	0.156093	0.94628	0.385303	0.408133	0.267645	0.623562	0.188047	0.307228	0.260038
cg11116300	14	101515879	MIR655	TSS200	6	0.902306	0.156956	8.98871e-09	0.888283	0.10642	7.00337e-17	0.0757666	0.824936	0.294499	1.03582	0.194363	0.856858	0.352265	1.72033	0.338474	0.635985	0.205869	0.461509	0.31757
cg10191005	14	102022947	DIO3OS	TSS1500	6	0.59237	0.109209	5.82108e-08	0.615601	0.0952447	1.02403e-10	0.28784	0.209107	0.269691	0.862464	0.167145	0.322634	0.347636	0.623464	0.313033	0.702095	0.187657	0.372403	0.269049
cg05235525	14	102687624	WDR20	Body	6	0.768881	0.143183	7.87736e-08	0.768881	0.143183	7.87736e-08	0.639051	1.36688	0.394022	0.545428	0.258937	0.746278	0.510066	0.654168	0.440106	0.858387	0.278997	0.591114	0.423789
cg14217091	14	103285756	TRAF3;TRAF3;TRAF3	5'UTR;5'UTR;5'UTR	6	0.842389	0.12504	1.61714e-11	0.84199	0.118234	1.0685e-12	0.368883	0.826163	0.329558	0.945858	0.196569	1.70752	0.45693	0.738565	0.403093	0.627454	0.237641	0.553018	0.35817
cg04264002	14	103592734	TNFAIP2;TNFAIP2	5'UTR;1stExon	6	0.813711	0.122079	2.63851e-11	0.813711	0.122079	2.63851e-11	0.451203	0.508756	0.343254	1.04171	0.203301	0.644049	0.468252	1.28152	0.402879	0.54627	0.258921	0.694427	0.337497
cg00241281	14	105779794	PACS2;PACS2	TSS1500;TSS1500	6	-0.929697	0.169793	4.36323e-08	-0.929697	0.169793	4.36323e-08	0.446225	-1.19959	0.419653	-0.75292	0.300198	-1.29358	0.583481	-1.39234	0.528335	-0.992325	0.342274	0.0617784	0.591716
cg11199011	15	22955557	CYFIP1;CYFIP1	Body;TSS200	6	0.591705	0.10509	1.79703e-08	0.591705	0.10509	1.79703e-08	0.421811	0.369903	0.265133	0.557763	0.187606	0.402106	0.378494	1.24173	0.337663	0.647545	0.216264	0.456997	0.304599
cg02334109	15	26044050	ATP10A	Body	5	-0.769407	0.136017	1.54307e-08	-0.769407	0.136017	1.54307e-08	0.672519	-0.334146	0.383469	-0.836007	0.202721	-0.326275	0.576692	-0.899459	0.410305	-0.905344	0.267532	NA	NA
cg18432451	15	39145977			6	0.723742	0.101635	1.07134e-12	0.723742	0.101635	1.07134e-12	0.664136	0.595059	0.258814	0.806834	0.18774	0.499997	0.340197	0.387006	0.289222	0.92219	0.207142	0.817156	0.322616
cg22107533	15	45028083	TRIM69;TRIM69	TSS1500;TSS1500	6	0.981732	0.145756	1.6342e-11	0.981732	0.145756	1.6342e-11	0.830027	1.01352	0.359186	1.01475	0.254264	0.905176	0.55008	1.36809	0.432267	0.667919	0.300292	1.20299	0.493545
cg05439368	15	45028098	TRIM69;TRIM69	TSS1500;TSS1500	6	1.09758	0.155866	1.89735e-12	1.09758	0.155866	1.89735e-12	0.534962	1.06787	0.399833	1.1527	0.273589	1.14966	0.522113	1.84718	0.4724	0.710061	0.314685	1.04083	0.55054
cg05492904	15	51604503	CYP19A1;CYP19A1	5'UTR;5'UTR	6	0.728838	0.13179	3.19662e-08	0.728838	0.13179	3.19662e-08	0.450812	0.830632	0.370206	0.971331	0.230132	0.475297	0.498197	0.0846733	0.445994	0.850256	0.264186	0.379261	0.353268
cg05303280	15	51632611	GLDN	TSS1500	6	1.00138	0.163975	1.01576e-09	1.00138	0.163975	1.01576e-09	0.468168	1.13752	0.43256	1.34623	0.30454	1.17313	0.485278	0.937907	0.544021	0.840738	0.330967	0.190754	0.481656
cg20857280	15	51632905	GLDN	TSS1500	6	0.919588	0.155247	3.1535e-09	0.919588	0.155247	3.1535e-09	0.573945	0.907309	0.410882	1.20077	0.28256	1.36478	0.603189	0.445067	0.481131	0.935363	0.314489	0.445083	0.41297
cg24492778	15	57414740	TCF12;TCF12;TCF12;TCF12	Body;Body;Body;Body	6	-1.05821	0.17624	1.92046e-09	-1.05821	0.17624	1.92046e-09	0.65622	-1.06831	0.463356	-1.27863	0.303945	-1.05751	0.802003	-1.40613	0.515322	-0.98086	0.382791	-0.354615	0.467879
cg26222731	15	57695943	CGNL1	5'UTR	6	0.500744	0.0935305	8.61209e-08	0.500744	0.0935305	8.61209e-08	0.595727	0.589798	0.258529	0.572885	0.159782	-0.246749	0.411592	0.566289	0.285568	0.494509	0.19249	0.475382	0.257964
cg24384437	15	57724857	CGNL1	5'UTR	6	0.792039	0.124316	1.87581e-10	0.806087	0.10913	1.5074e-13	0.292543	0.472303	0.272496	1.03487	0.194593	1.14619	0.444735	0.777051	0.36099	0.90632	0.219724	0.325352	0.306438
cg03707955	15	61237076	RORA	Body	5	0.769649	0.10114	2.74679e-14	0.769649	0.10114	2.74679e-14	0.861828	0.721816	0.271005	0.877046	0.165613	0.845132	0.324495	0.811009	0.287256	0.597689	0.195864	NA	NA
cg01374580	15	62521056			6	1.03449	0.167051	5.9149e-10	1.07231	0.134023	1.23443e-15	0.199363	0.806144	0.311896	1.59769	0.247055	1.035	0.385239	0.950755	0.451396	0.884217	0.278514	0.491199	0.472896
cg17444521	15	62543979			6	0.61615	0.111824	3.58884e-08	0.622861	0.100751	6.32219e-10	0.317218	0.229731	0.261827	0.732632	0.172083	0.791187	0.367391	0.913877	0.311333	0.742732	0.220576	0.228421	0.290143
cg27425169	15	66313425	MEGF11	Body	6	0.757639	0.138615	4.60923e-08	0.757639	0.138615	4.60923e-08	0.552579	0.329197	0.316188	0.8135	0.235896	0.254982	0.612995	1.17338	0.451566	0.854925	0.286437	1.08064	0.481229
cg04875821	15	68253897			6	0.44197	0.0798194	3.07487e-08	0.44197	0.0798194	3.07487e-08	0.47881	0.712233	0.203241	0.537963	0.136298	0.449785	0.362129	0.370319	0.23824	0.275496	0.166049	0.185194	0.239686
cg02454476	15	68844912			6	0.839008	0.123871	1.25915e-11	0.861898	0.102213	3.38696e-17	0.2355	0.432086	0.306763	0.978687	0.174584	0.809286	0.387684	1.09065	0.297239	1.05841	0.211374	0.367119	0.289547
cg26962618	15	70767183			6	-1.12304	0.209708	8.54365e-08	-1.13595	0.163584	3.80801e-12	0.189615	-0.896795	0.480854	-1.12407	0.272502	-1.35428	0.646219	-1.7281	0.486684	-1.45544	0.341838	-0.0998833	0.476519
cg12950645	15	71410605			6	0.873425	0.124924	2.71698e-12	0.873597	0.123272	1.37332e-12	0.405668	1.09465	0.329823	1.05312	0.202861	1.22352	0.443226	0.916334	0.438039	0.478738	0.239229	0.543368	0.469384
cg12399197	15	71667720	THSD4	Body	6	0.835286	0.154303	6.18765e-08	0.835286	0.154303	6.18765e-08	0.444406	0.374488	0.419799	0.875383	0.27324	1.39343	0.507377	0.501415	0.459464	1.12746	0.30212	0.325563	0.545976
cg03224126	15	72491032	GRAMD2	TSS1500	6	0.659845	0.109898	1.9231e-09	0.659845	0.109898	1.9231e-09	0.698231	0.439368	0.317172	0.847108	0.179448	-0.152276	0.929467	0.674078	0.348984	0.663027	0.222196	0.424631	0.286533
cg10586317	15	73979250	CD276;CD276	5'UTR;5'UTR	6	0.695145	0.119106	5.33558e-09	0.718747	0.0932319	1.26575e-14	0.192528	0.682709	0.254435	0.996673	0.160851	1.04751	0.472055	0.661002	0.258109	0.56896	0.189179	0.229549	0.272077
cg22186216	15	74637558	CYP11A1;CYP11A1	Body;5'UTR	5	0.681871	0.106725	1.66943e-10	0.681871	0.106725	1.66943e-10	0.538506	0.402991	0.286573	0.807162	0.175113	0.20949	0.397802	0.823467	0.295533	0.70857	0.199056	NA	NA
cg08765811	15	77956125			6	0.779614	0.115936	1.76147e-11	0.779614	0.115936	1.76147e-11	0.589521	0.405163	0.320341	1.04511	0.19547	0.762676	0.466373	0.77406	0.328264	0.691778	0.238156	0.547071	0.378697
cg13641690	15	78114888			6	0.670079	0.0991008	1.36482e-11	0.670079	0.0991008	1.36482e-11	0.4938	0.633764	0.265679	0.710875	0.183685	0.230383	0.436525	0.747401	0.273884	0.892885	0.196909	0.291666	0.270693
cg17820039	15	81218869	KIAA1199	Body	6	0.584431	0.0898308	7.72269e-11	0.584431	0.0898308	7.72269e-11	0.504243	0.263195	0.236	0.537852	0.15437	0.616374	0.333824	0.810047	0.354575	0.809995	0.173005	0.445754	0.270509
cg22579224	15	81243145	KIAA1199	3'UTR	6	0.707399	0.123634	1.05441e-08	0.707362	0.115316	8.56258e-10	0.351093	0.909671	0.344399	0.812966	0.204223	1.30585	0.440446	0.121292	0.361535	0.548609	0.230521	0.720655	0.299216
cg22294181	15	85431307	SLC28A1;SLC28A1	Body;Body	6	1.00899	0.129934	8.13777e-15	1.02558	0.108273	2.74159e-21	0.242335	0.756151	0.321649	1.1602	0.185044	0.99766	0.365324	1.46927	0.317594	1.03933	0.226248	0.415873	0.324628
cg09704544	15	85616433	PDE8A;PDE8A	Body;Body	6	0.731954	0.132777	3.53475e-08	0.733377	0.128965	1.29568e-08	0.388717	0.479224	0.307419	0.900377	0.232393	1.39196	0.606204	0.95278	0.381457	0.779955	0.268858	0.161342	0.362746
cg14829066	15	88559141	NTRK3;NTRK3;NTRK3	Body;Body;Body	6	0.813421	0.145576	2.302e-08	0.825702	0.109982	6.02115e-14	0.145204	0.846968	0.271429	1.1479	0.197945	1.25301	0.390273	0.78652	0.340587	0.394173	0.238285	0.512187	0.304589
cg17241841	15	89158993			6	0.823463	0.148556	2.97123e-08	0.856798	0.111111	1.24617e-14	0.14197	0.940047	0.278548	1.26096	0.20266	0.653538	0.384474	0.904549	0.328839	0.560867	0.221267	0.319614	0.369449
cg12445786	15	89533560			6	0.800321	0.129418	6.24898e-10	0.800321	0.129418	6.24898e-10	0.570389	1.01663	0.36415	0.946568	0.210803	-0.155553	0.564489	0.721488	0.402553	0.709157	0.280536	0.764009	0.361666
cg09803904	15	89939709	LOC254559	Body	6	0.659553	0.117791	2.15174e-08	0.659553	0.117791	2.15174e-08	0.652414	1.09801	0.323644	0.475823	0.211067	0.389974	0.407035	0.539629	0.414229	0.753364	0.225076	0.708219	0.343487
cg05775517	15	93158989			6	1.04011	0.170028	9.51905e-10	1.04011	0.170028	9.51905e-10	0.577762	0.80534	0.426502	1.47812	0.321909	1.02109	0.550549	1.18566	0.581374	0.97017	0.344734	0.470865	0.45783
cg00153693	15	93249643			6	1.15594	0.191588	1.60455e-09	1.15835	0.188468	7.93816e-10	0.400499	1.40981	0.455261	1.48883	0.330652	1.2365	0.642804	0.304237	0.589583	0.671074	0.409859	1.47648	0.584016
cg07068980	15	93924162			5	0.706484	0.117711	1.95067e-09	0.706484	0.117711	1.95067e-09	0.633846	0.539354	0.283457	0.935586	0.205308	0.897917	0.410251	0.634316	0.330792	0.523275	0.218626	NA	NA
cg24142894	15	97322434			6	0.995147	0.140336	1.32966e-12	0.995147	0.140336	1.32966e-12	0.55406	0.652863	0.380636	1.26763	0.257457	0.908656	0.518326	1.01127	0.373343	1.08377	0.268661	0.309007	0.497708
cg23702610	15	100017287			6	-0.728537	0.108204	1.66172e-11	-0.742002	0.0890276	7.78124e-17	0.246889	-0.562963	0.217178	-0.745279	0.143184	-0.0891277	0.408661	-0.841479	0.262115	-1.07718	0.200139	-0.529485	0.305962
cg14397171	15	101728653	CHSY1	Body	6	0.594462	0.107183	2.9189e-08	0.596253	0.104323	1.09424e-08	0.389986	0.573774	0.251666	0.827565	0.184435	0.894686	0.390001	0.6879	0.322719	0.236381	0.232912	0.376726	0.287635
cg08042055	16	811031	MSLN;MSLN	TSS200;TSS200	5	0.615371	0.107979	1.20512e-08	0.615371	0.107979	1.20512e-08	0.885571	0.509038	0.312914	0.517425	0.166862	0.758087	0.426105	0.630272	0.299899	0.774069	0.208457	NA	NA
cg09866569	16	2737340	KCTD5	Body	6	-0.578862	0.106017	4.75972e-08	-0.578862	0.106017	4.75972e-08	0.593249	-0.562378	0.304434	-0.77904	0.169972	0.109023	0.569286	-0.573816	0.300752	-0.470082	0.222517	-0.32146	0.329161
cg08550394	16	4013659	ADCY9	3'UTR	5	1.01557	0.188786	7.47028e-08	1.00371	0.178043	1.72565e-08	0.35857	1.50306	0.408364	0.809931	0.292589	1.81406	0.698448	1.12696	0.510257	0.644567	0.354042	NA	NA
cg02003612	16	8622412	TMEM114	TSS200	6	0.646684	0.118312	4.60532e-08	0.646684	0.118312	4.60532e-08	0.545245	0.726859	0.29648	0.734572	0.20529	1.01271	0.475039	0.656382	0.314344	0.614532	0.248352	-0.106636	0.423694
cg01601926	16	8986308	USP7	3'UTR	6	0.541863	0.0922751	4.29908e-09	0.541863	0.0922751	4.29908e-09	0.476138	0.621379	0.227554	0.582849	0.161429	-0.0689165	0.36059	0.538865	0.287882	0.707192	0.189888	0.300565	0.285516
cg03935060	16	10272021	GRIN2A;GRIN2A;GRIN2A	Body;Body;Body	6	0.660138	0.121391	5.38533e-08	0.660138	0.121391	5.38533e-08	0.486705	0.719881	0.319727	0.943852	0.202763	0.20276	0.491239	0.525668	0.404496	0.56406	0.25467	0.253441	0.351768
cg01348055	16	10272788	GRIN2A;GRIN2A;GRIN2A	Body;Body;Body	6	0.765158	0.142305	7.57778e-08	0.796651	0.108814	2.45758e-13	0.162279	0.680143	0.28099	0.897519	0.194063	0.594215	0.386125	1.05928	0.348328	1.03804	0.218279	0.0357779	0.32792
cg04339790	16	10675656	EMP2	TSS1500	6	0.850092	0.111247	2.14775e-14	0.858368	0.100527	1.35746e-17	0.318557	1.01773	0.260342	1.11426	0.181785	1.0251	0.364665	0.647814	0.316317	0.683792	0.198763	0.424149	0.299974
cg01573635	16	10788751	TEKT5;TEKT5	1stExon;5'UTR	6	0.933156	0.149512	4.33857e-10	0.933156	0.149512	4.33857e-10	0.462403	1.00749	0.410903	1.31213	0.257326	0.819647	0.507979	0.509045	0.419165	0.808561	0.30211	0.322947	0.560162
cg03222834	16	13177060	SHISA9	Body	6	0.955598	0.131792	4.14349e-13	0.956502	0.131242	3.14417e-13	0.412135	0.732356	0.323992	1.12126	0.238545	0.71958	0.475705	0.605445	0.386143	1.28233	0.253843	0.396358	0.481569
cg00830621	16	18799106	RPS15A;RPS15A	Body;Body	5	1.46094	0.262155	2.50666e-08	1.54503	0.125803	1.14103e-34	0.00349573	1.44555	0.300682	1.8297	0.210623	0.202539	0.453265	2.25379	0.359447	1.2936	0.242706	NA	NA
cg00232483	16	19849514	IQCK	Body	6	0.641904	0.116793	3.88289e-08	0.641904	0.116793	3.88289e-08	0.9493	0.470938	0.29942	0.759624	0.198627	0.365203	0.418226	0.63575	0.323764	0.651928	0.240298	0.734046	0.485943
cg27150412	16	31161431	PRSS36	TSS200	6	0.49498	0.0920283	7.50822e-08	0.49498	0.0920283	7.50822e-08	0.523931	0.265064	0.264533	0.458897	0.153245	0.494516	0.415404	0.149036	0.288467	0.731499	0.188066	0.646792	0.257203
cg01701649	16	48589954	N4BP1	Body	6	-0.928098	0.139464	2.83756e-11	-0.928098	0.139464	2.83756e-11	0.688657	-1.22365	0.376927	-1.14148	0.252382	-0.603993	0.48608	-0.767027	0.378125	-0.914884	0.30927	-0.52865	0.378123
cg08435780	16	49749891	ZNF423	Body	6	0.622032	0.112844	3.54166e-08	0.642864	0.0996681	1.11816e-10	0.304807	0.297076	0.249908	0.847844	0.170501	-0.0125585	0.557943	0.525462	0.285349	0.818442	0.206556	0.45898	0.29716
cg04031656	16	53091688	CHD9	5'UTR	6	0.541225	0.0951419	1.2808e-08	0.541225	0.0951419	1.2808e-08	0.68974	0.880382	0.278213	0.526077	0.159077	0.828349	0.352626	0.329366	0.287972	0.423928	0.204721	0.488738	0.266546
cg09906857	16	56557397			6	0.76866	0.117551	6.19601e-11	0.76866	0.117551	6.19601e-11	0.4425	0.760053	0.350346	0.765056	0.204935	0.181421	0.502716	1.41671	0.364383	0.722519	0.240446	0.630752	0.293297
cg26946015	16	66178419			6	0.789235	0.108745	3.93868e-13	0.789235	0.108745	3.93868e-13	0.419204	0.356218	0.26965	0.835081	0.195957	0.697985	0.401221	1.10206	0.319579	1.01293	0.230253	0.591895	0.317787
cg08797423	16	66502262	BEAN	5'UTR	6	0.808319	0.135462	2.41452e-09	0.865081	0.10122	1.26811e-17	0.145009	0.654467	0.278111	1.16157	0.175624	0.517186	0.398994	0.627523	0.299588	1.03687	0.212078	0.398551	0.28175
cg26538442	16	66994947	CES3	TSS200	6	0.512301	0.0887695	7.87387e-09	0.512301	0.0887695	7.87387e-09	0.725716	0.304416	0.231053	0.570133	0.152637	0.427356	0.323604	0.6527	0.36655	0.664513	0.175239	0.271515	0.252434
cg06774893	16	68011109	DPEP3;DPEP3	Body;Body	6	0.925607	0.152317	1.22572e-09	0.902439	0.108873	1.14268e-16	0.117394	0.956774	0.340794	0.849735	0.182257	1.65861	0.414512	1.26984	0.296295	0.823257	0.23068	0.282656	0.321959
cg02004370	16	69362629	PDF;COG8	3'UTR;3'UTR	6	0.748348	0.133373	2.01213e-08	0.748348	0.133373	2.01213e-08	0.416857	0.499483	0.341097	0.866933	0.251778	1.11073	0.525558	0.0107391	0.420207	0.82096	0.249355	1.05171	0.392824
cg06469895	16	69418206	TERF2	Body	6	0.716774	0.125994	1.27805e-08	0.717605	0.125189	9.91573e-09	0.409775	0.585176	0.330186	1.03266	0.229497	1.04264	0.380299	0.269428	0.424874	0.594816	0.249403	0.358223	0.374842
cg08080174	16	72992580	ZFHX3;ZFHX3	Body;5'UTR	6	0.992579	0.155164	1.58511e-10	1.00546	0.129421	7.9137e-15	0.244023	1.5445	0.319993	1.08488	0.227876	0.641813	0.468607	1.15093	0.374469	0.808888	0.263675	0.279341	0.465734
cg01262865	16	75282094	BCAR1;BCAR1;BCAR1;BCAR1;BCAR1;BCAR1;BCAR1;BCAR1;BCAR1	Body;5'UTR;Body;Body;Body;1stExon;Body;Body;Body	6	0.555531	0.0852251	7.10624e-11	0.555531	0.0852251	7.10624e-11	0.735228	0.692887	0.204122	0.64195	0.155628	0.781537	0.345789	0.307629	0.253572	0.48357	0.164503	0.36108	0.294626
cg10371414	16	79451857			6	-1.14093	0.191402	2.50862e-09	-1.14093	0.191402	2.50862e-09	0.755619	-1.37526	0.543844	-1.39441	0.324916	-0.660844	0.89907	-0.610743	0.559628	-1.23956	0.402123	-0.744847	0.511064
cg03011928	16	83023240	CDH13	Body	5	0.762855	0.138279	3.45298e-08	0.776091	0.129188	1.88466e-09	0.349649	0.625192	0.324652	1.11793	0.211365	0.361614	0.452917	0.623801	0.351498	0.57932	0.257536	NA	NA
cg10064892	16	84860766	CRISPLD2	5'UTR	6	0.767239	0.139147	3.5102e-08	0.767239	0.139147	3.5102e-08	0.723913	0.890371	0.371732	0.933579	0.257341	0.24351	0.717337	1.078	0.412544	0.650589	0.250157	0.341461	0.425935
cg09780767	16	85882097			6	0.599574	0.105022	1.13612e-08	0.599574	0.105022	1.13612e-08	0.578369	0.25957	0.314633	0.538802	0.185494	0.196202	0.423969	0.745267	0.311947	0.839124	0.202311	0.608034	0.298422
cg05775492	16	86258717			6	0.616167	0.107422	9.69648e-09	0.616167	0.107422	9.69648e-09	0.450514	0.659029	0.25827	0.774538	0.181088	0.673942	0.400068	0.878014	0.30816	0.332529	0.263976	0.166161	0.315531
cg00593111	16	88958311	CBFA2T3;CBFA2T3	Body;Body	6	0.803748	0.111235	4.98625e-13	0.803748	0.111235	4.98625e-13	0.694079	0.644273	0.318552	1.02362	0.207307	0.516274	0.379681	1.00854	0.311177	0.751679	0.233665	0.579967	0.287279
cg19293468	17	1973400	SMG6;SMG6	Body;Body	6	1.20085	0.19046	2.88233e-10	1.22405	0.14838	1.59136e-16	0.176599	0.73019	0.389115	1.53283	0.256198	1.93228	0.457933	1.27278	0.53976	1.05396	0.326746	0.659601	0.407814
cg09911083	17	7754956	KDM6B	Body	6	0.555597	0.0939031	3.28445e-09	0.555597	0.0939031	3.28445e-09	0.568076	0.531138	0.24279	0.484218	0.167702	-0.0151015	0.370333	0.628916	0.23506	0.772141	0.197479	0.579405	0.318571
cg19697725	17	8198295	SLC25A35	TSS200	6	0.470888	0.0826282	1.20598e-08	0.47643	0.0691739	5.68116e-12	0.25526	0.377757	0.188026	0.645665	0.117586	0.696153	0.26447	0.59692	0.213973	0.263843	0.136746	0.271011	0.230887
cg10417386	17	8772067	PIK3R6	TSS1500	6	1.0278	0.171523	2.07034e-09	1.03296	0.150116	5.94031e-12	0.286851	1.07062	0.434941	1.35541	0.265674	0.846545	0.534109	1.75065	0.513969	0.661298	0.319635	0.625839	0.357071
cg07337250	17	9602953	USP43	Body	6	1.06639	0.179945	3.10045e-09	1.07879	0.125099	6.49453e-18	0.0830165	1.28438	0.333268	1.06273	0.224513	0.706502	0.392462	1.70262	0.365191	1.26664	0.274543	0.272831	0.358081
cg20572153	17	9929755	GAS7;GAS7;GAS7	Body;Body;TSS200	6	0.662568	0.10004	3.51894e-11	0.662568	0.10004	3.51894e-11	0.45773	0.631928	0.262087	0.794496	0.164166	0.391364	0.334016	0.780013	0.288519	0.778822	0.240676	0.119867	0.315962
cg05558046	17	9930101	GAS7;GAS7;GAS7	Body;Body;TSS1500	6	0.611653	0.108373	1.66199e-08	0.618931	0.0920014	1.72712e-11	0.256988	0.27237	0.266015	0.698133	0.163129	0.670337	0.377972	0.995301	0.262012	0.7111	0.192478	0.260398	0.236522
cg26898567	17	10630621	TMEM220	Body	6	1.01717	0.162249	3.62944e-10	1.05603	0.125382	3.68572e-17	0.16407	0.912352	0.299776	1.48479	0.224718	0.79267	0.424067	1.33321	0.386077	0.813064	0.275054	0.489396	0.372872
cg20538707	17	10707450			6	0.67775	0.124357	5.03546e-08	0.67775	0.124357	5.03546e-08	0.641971	0.192329	0.326848	0.850577	0.224343	0.8848	0.397283	0.80884	0.38493	0.574166	0.258117	0.741541	0.369105
cg24148361	17	12388639			6	0.78206	0.121271	1.1269e-10	0.785402	0.11775	2.55662e-11	0.391884	0.219334	0.300437	0.992064	0.203171	1.03563	0.452084	0.824375	0.340633	0.818481	0.223724	0.498151	0.548079
cg08343834	17	15168658	PMP22	TSS200	6	0.696046	0.112525	6.18353e-10	0.696046	0.112525	6.18353e-10	0.92315	0.602041	0.27504	0.736371	0.206131	0.955736	0.359004	0.502851	0.317638	0.780296	0.238524	0.5115	0.378629
cg08826152	17	15869607	ADORA2B	Body	6	-0.955831	0.167467	1.14597e-08	-0.968265	0.156656	6.37629e-10	0.359769	-0.590888	0.454626	-1.2451	0.254299	-1.62302	0.637517	-0.918431	0.508188	-0.94758	0.338078	-0.280004	0.43176
cg18016128	17	16396497	C17orf76;C17orf76	TSS1500;TSS1500	6	0.684522	0.103089	3.13491e-11	0.684522	0.103089	3.13491e-11	0.981803	0.743239	0.256507	0.631835	0.184575	0.615408	0.384494	0.798624	0.29252	0.7509	0.213345	0.501465	0.331066
cg12581691	17	17642247	RAI1	5'UTR	6	-0.595334	0.109678	5.6977e-08	-0.595334	0.109678	5.6977e-08	0.930978	-0.774799	0.288754	-0.529507	0.195127	-0.60729	0.430882	-0.488276	0.31835	-0.717325	0.220409	-0.380336	0.332672
cg23601905	17	17661060	RAI1	5'UTR	6	-0.649096	0.112895	8.94831e-09	-0.649096	0.112895	8.94831e-09	0.731116	-0.417248	0.322991	-0.760616	0.173768	-0.693077	0.481189	-0.733098	0.369055	-0.722159	0.243117	-0.15952	0.373272
cg26588076	17	17741631	SREBF1;SREBF1	TSS1500;TSS1500	6	-0.857612	0.149556	9.7868e-09	-0.857612	0.149556	9.7868e-09	0.56768	-0.85306	0.425243	-0.9986	0.263797	-1.28583	0.602569	-1.25391	0.41599	-0.650379	0.332717	-0.360762	0.37159
cg00516966	17	19651653	ALDH3A1;ALDH3A1	5'UTR;1stExon	6	0.646189	0.101708	2.10658e-10	0.646189	0.101708	2.10658e-10	0.533417	0.348825	0.270493	0.814802	0.177459	0.563325	0.411552	0.800416	0.314817	0.714503	0.200148	0.251437	0.311733
cg17933764	17	27069671	TRAF4;NEK8	TSS1500;3'UTR	6	-0.659767	0.113298	5.77075e-09	-0.669766	0.0926734	4.93174e-13	0.24058	-0.790291	0.247254	-0.898461	0.158233	-0.263936	0.48297	-1.0442	0.39414	-0.433436	0.204511	-0.429604	0.198008
cg18427091	17	30115417			6	0.807827	0.132034	9.45714e-10	0.807827	0.132034	9.45714e-10	0.487753	1.08184	0.366955	0.988802	0.236491	0.508025	0.449871	0.793727	0.401394	0.850933	0.26436	0.153386	0.389277
cg00747477	17	31340147	ACCN1;ACCN1	3'UTR;3'UTR	6	0.693303	0.123459	1.95838e-08	0.693303	0.123459	1.95838e-08	0.914155	0.525426	0.277785	0.823532	0.242079	0.733035	0.394146	0.882343	0.352932	0.677649	0.245711	0.350648	0.468545
cg23403099	17	32942254	TMEM132E	Body	6	0.717304	0.111947	1.47916e-10	0.717304	0.111947	1.47916e-10	0.954057	0.836115	0.312518	0.820955	0.186484	0.749298	0.475064	0.52162	0.325655	0.649879	0.222702	0.549958	0.384129
cg11992940	17	34094454	MMP28	Body	6	0.592136	0.104213	1.33133e-08	0.592136	0.104213	1.33133e-08	0.834285	0.770755	0.282499	0.715785	0.186682	0.661438	0.449222	0.52204	0.312128	0.373744	0.199942	0.597108	0.306863
cg20653009	17	36204252	LOC284100	Body	6	-0.67876	0.112217	1.46087e-09	-0.67876	0.112217	1.46087e-09	0.80382	-0.60021	0.347348	-0.710686	0.176332	-0.540597	0.434059	-0.875497	0.389768	-0.831614	0.236643	-0.280774	0.329443
cg05355301	17	39143239	KRT40	5'UTR	6	0.769472	0.135373	1.31496e-08	0.769472	0.135373	1.31496e-08	0.432924	1.20333	0.349989	0.9113	0.254584	0.289909	0.417465	0.420694	0.455554	0.553787	0.267415	1.0365	0.394215
cg26499286	17	39472498	KRTAP17-1	TSS1500	6	1.12053	0.19915	1.83822e-08	1.17076	0.164448	1.08483e-12	0.231192	0.883095	0.415512	1.5659	0.294499	1.34872	0.535072	0.589836	0.47155	1.36156	0.332575	0.170868	0.617283
cg20359565	17	41043969	LOC388387	Body	6	0.71319	0.104728	9.76327e-12	0.71319	0.104728	9.76327e-12	0.630567	0.60911	0.276169	0.858289	0.179581	0.575505	0.443286	0.627496	0.326348	0.869169	0.219766	0.30392	0.290226
cg11287987	17	41837048	SOST	TSS1500	6	0.740656	0.129121	9.68455e-09	0.754561	0.1127	2.15264e-11	0.291115	0.616858	0.317887	1.04551	0.194221	0.945619	0.449869	0.938254	0.357893	0.568116	0.224751	0.239508	0.319755
cg19176553	17	43049895			6	0.926812	0.164597	1.79369e-08	0.926812	0.164597	1.79369e-08	0.705643	0.989218	0.445141	0.879335	0.292162	1.77576	0.59684	0.941374	0.427961	0.833309	0.32008	0.309808	0.686608
cg11855943	17	47964664			5	0.901861	0.126955	1.214e-12	0.901861	0.126955	1.214e-12	0.799168	0.82453	0.319804	0.977531	0.225892	0.600464	0.361163	1.18472	0.332027	0.840224	0.250537	NA	NA
cg00081324	17	48201233	SAMD14	Body	6	0.510244	0.086865	4.25422e-09	0.510861	0.0850788	1.91854e-09	0.398635	0.260054	0.221576	0.484924	0.14624	0.219593	0.33611	0.893895	0.258501	0.639911	0.164007	0.348332	0.315744
cg18618815	17	48275324	COL1A1	Body	6	0.796475	0.144335	3.42456e-08	0.796475	0.144335	3.42456e-08	0.664746	0.909334	0.368504	1.05018	0.258543	1.05151	0.622714	0.366634	0.445689	0.731266	0.277411	0.348146	0.444122
cg02186748	17	48280370	COL1A1	TSS1500	6	0.647918	0.103183	3.4011e-10	0.647918	0.103183	3.4011e-10	0.437549	1.03494	0.27166	0.747372	0.177343	0.530292	0.344159	0.644521	0.345866	0.524549	0.223194	0.228474	0.29232
cg11181726	17	48282095			6	0.72268	0.125654	8.85309e-09	0.73711	0.115174	1.55386e-10	0.33298	0.461823	0.269614	1.05302	0.197448	0.399288	0.448023	0.850273	0.307435	0.400455	0.283412	0.782391	0.354278
cg06769994	17	48288538			6	0.913596	0.149683	1.03735e-09	0.913596	0.149683	1.03735e-09	0.57569	0.78092	0.408045	0.716899	0.256441	1.26023	0.553861	1.68001	0.473154	0.90449	0.292202	0.748146	0.501123
cg06900494	17	48609332	EPN3	TSS1500	6	0.79221	0.139725	1.4297e-08	0.796702	0.134636	3.26993e-09	0.379776	0.779376	0.343374	1.1738	0.252662	0.585865	0.4306	0.983055	0.370342	0.570523	0.265341	0.126636	0.491902
cg21508639	17	54667590			6	1.22788	0.207903	3.50479e-09	1.22453	0.125398	1.58879e-22	0.0331783	1.89163	0.367581	1.51916	0.212272	1.23908	0.539959	1.4038	0.394409	0.67022	0.256744	0.748681	0.333863
cg00115639	17	54701692			6	0.731385	0.119004	7.95316e-10	0.731385	0.119004	7.95316e-10	0.532817	0.881314	0.309428	0.818858	0.206335	1.31357	0.514392	0.507976	0.360035	0.729653	0.242135	0.230949	0.350752
cg17178761	17	55682851	MSI2;MSI2	Body;Body	6	-0.700735	0.117891	2.78279e-09	-0.700735	0.117891	2.78279e-09	0.746225	-0.92693	0.343093	-0.669263	0.194741	-0.832252	0.326784	-1.10662	0.404511	-0.472907	0.248536	-0.495033	0.429424
cg06966839	17	55685941	MSI2;MSI2	Body;Body	6	0.435932	0.0786468	2.97486e-08	0.435932	0.0786468	2.97486e-08	0.683581	0.419669	0.240962	0.462539	0.124183	0.846537	0.367735	0.377719	0.264801	0.503667	0.168591	0.170878	0.209578
cg12582317	17	55822272			6	1.50227	0.26466	1.37698e-08	1.50227	0.26466	1.37698e-08	0.538356	2.33418	0.69452	1.1394	0.51049	1.57936	0.863161	2.26254	0.752022	1.37705	0.529752	0.714119	0.768697
cg12229367	17	55822335			6	0.653632	0.116657	2.10668e-08	0.653353	0.115736	1.65002e-08	0.408066	1.09862	0.308847	0.401717	0.218866	0.335446	0.326748	0.702467	0.347764	0.840781	0.228892	0.589334	0.390029
cg10303698	17	55969998	CUEDC1	5'UTR	6	0.563337	0.104671	7.36704e-08	0.563337	0.104671	7.36704e-08	0.660914	0.343211	0.274014	0.49818	0.185082	0.520088	0.326999	0.879755	0.297201	0.747462	0.219721	0.270775	0.368204
cg21380024	17	61042803			6	1.01992	0.175049	5.66219e-09	1.02501	0.17218	2.63068e-09	0.401173	0.799187	0.475418	1.55188	0.292302	0.94141	0.688418	0.763634	0.494928	0.666118	0.373233	0.706571	0.486113
cg20998539	17	62208374	ERN1	TSS1500	6	0.819096	0.151433	6.33847e-08	0.868815	0.0977901	6.42146e-19	0.0556425	0.954208	0.279013	1.15889	0.168294	0.25128	0.333637	1.20239	0.289697	0.64944	0.196823	0.446094	0.320985
cg20697044	17	64971888	CACNG4	Body	6	0.682489	0.122601	2.59507e-08	0.682489	0.122601	2.59507e-08	0.565055	0.986929	0.345383	0.822388	0.203687	1.13138	0.592907	0.688244	0.413129	0.387723	0.242641	0.4158	0.345968
cg13699963	17	71548861	SDK2	Body	6	0.717303	0.127621	1.90305e-08	0.717303	0.127621	1.90305e-08	0.479507	0.834597	0.376511	0.768849	0.211546	0.234241	0.468527	1.31006	0.414053	0.723263	0.280417	0.344888	0.335327
cg08453903	17	71688187			6	1.15002	0.210257	4.51117e-08	1.15002	0.210257	4.51117e-08	0.943152	0.712169	0.539162	1.3612	0.385572	1.30476	0.703176	1.27588	0.645327	0.996871	0.424317	1.27969	0.635528
cg16755067	17	72259202			6	0.567171	0.0871583	7.64767e-11	0.57057	0.0831468	6.78082e-12	0.372904	0.380529	0.249721	0.557368	0.14771	0.549324	0.33047	0.667052	0.239574	0.80729	0.162685	0.202487	0.233033
cg10866062	17	72358370	BTBD17	TSS1500	6	0.834098	0.155021	7.42623e-08	0.834098	0.155021	7.42623e-08	0.717455	0.758962	0.377601	0.873309	0.274415	0.0302388	0.547143	1.08295	0.477702	1.01234	0.301861	0.698656	0.617601
cg25874108	17	72892908			6	0.807204	0.14143	1.14689e-08	0.807204	0.14143	1.14689e-08	0.561364	0.698161	0.341599	1.02854	0.250817	0.187161	0.480349	0.956225	0.414116	0.903446	0.287801	0.221333	0.551319
cg09185884	17	73056145	KCTD2	Body	6	-0.822971	0.147442	2.38243e-08	-0.840536	0.137787	1.05904e-09	0.352494	-0.392416	0.391323	-1.1947	0.238765	-0.374726	0.497511	-0.854019	0.397124	-0.927241	0.28671	-0.420313	0.406392
cg21015805	17	73080225			6	0.629256	0.113787	3.20043e-08	0.629256	0.113787	3.20043e-08	0.529118	0.74274	0.31055	0.555192	0.204173	0.229159	0.42725	1.23643	0.36008	0.593769	0.23565	0.522043	0.292624
cg25950100	17	73914099	FBF1	Body	6	0.632552	0.107297	3.73881e-09	0.63892	0.101303	2.84412e-10	0.366453	0.278268	0.326692	0.647115	0.169487	0.118003	0.427004	0.593983	0.295157	0.97439	0.208889	0.547651	0.273356
cg16277071	17	75537317			6	0.779644	0.124355	3.62167e-10	0.779644	0.124355	3.62167e-10	0.464705	0.712235	0.352128	0.985879	0.209887	0.896001	0.461523	0.206515	0.374806	0.910366	0.257301	0.410318	0.378428
cg18502099	17	77833495			6	0.668033	0.101458	4.56879e-11	0.667949	0.0992704	1.71323e-11	0.398028	0.784693	0.270865	0.762175	0.165049	1.12581	0.40066	0.849579	0.304175	0.414559	0.200202	0.280645	0.330605
cg23514211	17	79304188	TMEM105;TMEM105	5'UTR;1stExon	6	0.528222	0.097378	5.81332e-08	0.529153	0.0901259	4.32485e-09	0.348261	0.520187	0.263458	0.379531	0.155401	0.507906	0.459115	0.369407	0.233688	0.884393	0.178741	0.392495	0.277993
cg15378486	17	79491582			6	0.739624	0.137343	7.2346e-08	0.739624	0.137343	7.2346e-08	0.92421	0.764099	0.387687	0.898946	0.238214	0.753043	0.500744	0.343072	0.427276	0.66364	0.268566	0.776899	0.430008
cg16755922	17	80536214	FOXK2	Body	6	1.11653	0.206781	6.67939e-08	1.11653	0.206781	6.67939e-08	0.988581	1.22876	0.477083	1.06169	0.401582	0.845389	0.695927	1.04925	0.63457	1.05304	0.422378	1.46883	0.615523
cg24667758	18	24283696	LOC728606	TSS200	6	0.518825	0.0915279	1.4406e-08	0.518825	0.0915279	1.4406e-08	0.656617	0.207594	0.229343	0.691684	0.16737	0.483558	0.376452	0.561557	0.257096	0.579113	0.202533	0.401614	0.23508
cg12179154	18	33157203			5	0.683056	0.116825	5.01087e-09	0.683056	0.116825	5.01087e-09	0.435653	0.531419	0.255916	0.833429	0.205068	0.24503	0.322635	0.979916	0.292119	0.641857	0.278467	NA	NA
cg19811144	18	46286151	KIAA0427;KIAA0427	Body;Body	6	0.890852	0.118938	6.88372e-14	0.890852	0.118938	6.88372e-14	0.419284	1.12922	0.312539	1.06395	0.212038	0.904654	0.407557	0.847454	0.379294	0.895326	0.257519	0.286617	0.313723
cg02986451	18	59159403	CDH20	Body	6	1.06379	0.155454	7.74822e-12	1.09715	0.106175	4.97629e-25	0.0837843	1.16095	0.281418	1.45992	0.194367	0.807599	0.415512	1.35663	0.360859	0.968061	0.204384	0.471409	0.286309
cg05875463	18	60385273	PHLPP1	Body	5	-0.923447	0.155717	3.02371e-09	-0.923447	0.155717	3.02371e-09	0.604317	-0.627203	0.401669	-0.933316	0.237865	-0.403927	0.54328	-1.37845	0.417421	-1.02179	0.348335	NA	NA
cg05637351	18	63417669	CDH7;CDH7	5'UTR;TSS1500	6	-0.266724	0.0485067	3.826e-08	-0.266724	0.0485067	3.826e-08	0.437979	0.0165589	0.162713	-0.322909	0.0745955	-0.38467	0.199016	-0.135505	0.156619	-0.307466	0.103288	-0.249044	0.144676
cg27050031	18	76278167			6	0.66778	0.116142	8.94235e-09	0.66778	0.116142	8.94235e-09	0.989212	0.471531	0.332131	0.657393	0.202922	0.796019	0.388636	0.77313	0.358336	0.700857	0.236441	0.640691	0.343255
cg09930046	19	840737	PRTN3	TSS1500	6	0.500356	0.0843904	3.04655e-09	0.500356	0.0843904	3.04655e-09	0.471831	0.152736	0.253358	0.667875	0.137237	0.65376	0.338355	0.285299	0.253163	0.514377	0.174482	0.368171	0.262106
cg02092181	19	2162766	DOT1L	TSS1500	5	1.07846	0.192369	2.06809e-08	1.07846	0.192369	2.06809e-08	0.529913	1.53149	0.48834	1.13053	0.334517	NA	NA	1.31742	0.527534	0.964374	0.366132	0.243008	0.593409
cg04173586	19	2167496	DOT1L	Body	6	2.17195	0.384328	1.59237e-08	2.20214	0.254989	5.81127e-18	0.0684765	2.35459	0.687582	3.09559	0.457816	1.78185	1.06392	2.88382	0.747351	1.1107	0.49741	1.62677	0.74994
cg13492223	19	5839901	FUT6;FUT6	TSS200;TSS200	6	0.656353	0.120064	4.58549e-08	0.671206	0.104941	1.59453e-10	0.299029	0.455153	0.304994	0.99591	0.180524	0.850976	0.51075	0.69603	0.31437	0.466921	0.198714	0.333576	0.314764
cg21991633	19	9515211			6	0.639206	0.11625	3.82933e-08	0.639206	0.11625	3.82933e-08	0.485879	0.631987	0.276785	0.911701	0.208726	0.743382	0.407531	0.726898	0.323559	0.318756	0.257967	0.258987	0.367846
cg05718253	19	11347359	LOC55908;DOCK6	TSS1500;Body	6	0.685238	0.12314	2.62627e-08	0.685238	0.12314	2.62627e-08	0.517523	1.15343	0.386988	0.674719	0.207981	0.824257	0.463817	1.07916	0.381273	0.412356	0.243304	0.474499	0.359636
cg04367503	19	13121571	NFIX	Body	6	1.84995	0.305721	1.43867e-09	1.84995	0.305721	1.43867e-09	0.554107	2.92435	0.751049	1.844	0.581285	1.19724	0.779799	1.28962	0.912133	2.09314	0.647853	0.874436	1.16424
cg17904367	19	14555234	PKN1;PKN1	Body;Body	6	0.564048	0.0948037	2.68731e-09	0.564048	0.0948037	2.68731e-09	0.467666	0.443705	0.28357	0.424904	0.160791	0.522774	0.4125	0.989294	0.266533	0.480082	0.191275	0.830747	0.278841
cg02381279	19	16394366			6	-0.948774	0.148426	1.63481e-10	-0.948774	0.148426	1.63481e-10	0.897302	-0.844907	0.409937	-1.0887	0.245375	-0.855256	0.559335	-1.22783	0.501269	-0.929977	0.322758	-0.56292	0.406325
cg03719032	19	19374710	HAPLN4	TSS1500	6	0.440427	0.0753841	5.14428e-09	0.445107	0.0716157	5.12552e-10	0.378066	0.297463	0.217486	0.569786	0.113964	0.724626	0.341141	0.458596	0.267274	0.431139	0.140319	0.0887893	0.206456
cg07624008	19	33672378			6	0.643198	0.118074	5.11026e-08	0.643198	0.118074	5.11026e-08	0.982273	0.506225	0.334013	0.670483	0.202394	0.600065	0.434567	0.847543	0.349218	0.65366	0.234824	0.483263	0.385666
cg19631648	19	33764284			6	0.452111	0.0832275	5.56547e-08	0.452111	0.0832275	5.56547e-08	0.7278	0.303103	0.225436	0.560232	0.140543	0.0221583	0.358186	0.539297	0.241066	0.485852	0.176948	0.348822	0.241665
cg05670193	19	45324246	BCAM	3'UTR	6	0.630538	0.0926334	9.97847e-12	0.630538	0.0926334	9.97847e-12	0.84251	0.869816	0.249792	0.521628	0.15872	0.648199	0.297287	0.438755	0.288301	0.717996	0.191297	0.650847	0.313989
cg16158874	19	46095562	GPR4	5'UTR	6	0.576564	0.0844467	8.6378e-12	0.576564	0.0844467	8.6378e-12	0.911967	0.559154	0.224923	0.680341	0.142182	0.548867	0.311453	0.605961	0.259093	0.5212	0.168728	0.295503	0.306232
cg15507486	19	46627896	IGFL3	1stExon	6	0.711488	0.123846	9.1947e-09	0.711488	0.123846	9.1947e-09	0.458362	0.417624	0.306766	0.918184	0.210628	1.1439	0.515916	0.983137	0.427946	0.381454	0.256308	0.761487	0.362934
cg16580765	19	47216767	PRKD2;PRKD2;PRKD2;PRKD2	Body;5'UTR;Body;Body	6	-0.421382	0.0778173	6.12829e-08	-0.421382	0.0778173	6.12829e-08	0.654319	-0.588605	0.195547	-0.457519	0.143106	-0.0167557	0.264615	-0.491836	0.247507	-0.419189	0.16992	-0.363859	0.200333
cg09923953	19	51525638	KLK11;KLK11;KLK11;KLK11	3'UTR;3'UTR;3'UTR;3'UTR	6	0.776924	0.132406	4.4178e-09	0.776924	0.132406	4.4178e-09	0.522116	0.714695	0.370606	0.819763	0.234204	0.517592	0.462077	0.727607	0.430005	1.11186	0.260346	0.210131	0.38681
cg21930712	19	51761116	C19orf75;C19orf75	1stExon;5'UTR	6	0.571404	0.0985337	6.66837e-09	0.571404	0.0985337	6.66837e-09	0.657146	0.788732	0.248151	0.696824	0.168532	0.427864	0.400344	0.542279	0.292471	0.290248	0.208824	0.546933	0.305853
cg12315311	19	54568443	VSTM1	TSS1500	6	1.01459	0.171213	3.10576e-09	1.04503	0.12951	7.08176e-16	0.175883	1.3992	0.344755	1.28089	0.208114	1.18408	0.570891	1.11397	0.448233	0.745689	0.272703	0.264735	0.38849
cg25667998	19	56705433	ZSCAN5B	TSS1500	6	0.648541	0.116837	2.84316e-08	0.648541	0.116837	2.84316e-08	0.561101	0.48748	0.283352	0.818794	0.221269	1.01564	0.38145	0.846213	0.359184	0.539112	0.240023	0.216448	0.345154
cg15805104	19	56988935	ZNF667;ZNF667	TSS200;TSS200	6	-0.709296	0.131601	7.0561e-08	-0.709296	0.131601	7.0561e-08	0.496588	-0.972519	0.286367	-0.813342	0.231006	-0.778155	0.373562	-0.573279	0.484302	-0.557218	0.292464	0.184578	0.520839
cg19188359	20	2312099	TGM3	Body	6	0.597289	0.0889474	1.87966e-11	0.597289	0.0889474	1.87966e-11	0.917027	0.540102	0.276762	0.587035	0.151824	0.537989	0.362313	0.822053	0.250798	0.63231	0.181875	0.412906	0.248371
cg17401106	20	3650493	ADAM33;ADAM33	Body;Body	6	0.662369	0.107268	6.62125e-10	0.669181	0.0922062	3.94469e-13	0.266745	0.323434	0.249089	0.805603	0.167088	0.597408	0.350299	1.11974	0.27309	0.644018	0.18722	0.409345	0.253215
cg04656451	20	5626258			6	-0.691865	0.129381	8.91697e-08	-0.702609	0.115398	1.13929e-09	0.315235	-0.390191	0.307962	-0.865723	0.188846	-0.590634	0.491932	-1.21908	0.386948	-0.748417	0.259046	-0.244201	0.304348
cg16201146	20	19191526			6	0.663026	0.120291	3.5509e-08	0.663026	0.120291	3.5509e-08	0.511461	0.383728	0.290274	0.942564	0.204906	0.523301	0.469401	0.639009	0.375227	0.670244	0.244788	0.14104	0.443084
cg06738786	20	19265058	LOC100130264;SLC24A3	Body;Body	6	1.2665	0.213505	2.99328e-09	1.29052	0.153884	5.01611e-17	0.119651	1.66537	0.406764	1.70705	0.263659	1.23551	0.545387	1.29975	0.486431	0.563832	0.319913	1.06285	0.474524
cg20861822	20	30406707	MYLK2	TSS1500	6	0.724673	0.117198	6.27702e-10	0.727421	0.104911	4.09993e-12	0.321318	0.999236	0.317846	0.953009	0.178197	0.917136	0.495897	0.40825	0.308502	0.423982	0.200664	0.759556	0.315315
cg24691461	20	30598501	C20orf160	Body	6	0.634165	0.110935	1.08698e-08	0.63418	0.110084	8.36851e-09	0.408745	1.0621	0.30726	0.722472	0.189366	0.425471	0.328622	0.803854	0.354802	0.269268	0.242437	0.613666	0.319085
cg10637995	20	31781151	BASE	TSS1500	6	0.991754	0.145179	8.41908e-12	0.991754	0.145179	8.41908e-12	0.690564	0.945917	0.414214	1.23536	0.268826	0.513366	0.474629	1.20426	0.400239	0.745951	0.279934	1.18318	0.48022
cg18215705	20	33449029	GGT7	Body	6	0.652175	0.120312	5.93732e-08	0.653021	0.104803	4.63678e-10	0.284062	0.781851	0.255759	0.801232	0.181759	1.08507	0.355856	0.806657	0.4125	0.28139	0.232851	0.357876	0.274521
cg17485530	20	36974799	LBP	TSS200	6	0.922557	0.143712	1.36722e-10	0.924932	0.131059	1.69702e-12	0.331311	1.089	0.375804	1.10316	0.225253	1.68396	0.550747	0.865401	0.407331	0.780808	0.273697	0.366018	0.337941
cg14378039	20	41873421			6	0.602213	0.10536	1.09218e-08	0.602213	0.10536	1.09218e-08	0.464703	0.447943	0.277481	0.807635	0.193697	0.558816	0.380213	0.992678	0.31459	0.436299	0.22301	0.318232	0.274066
cg16862791	20	42142596	L3MBTL;L3MBTL	TSS1500;TSS1500	6	-0.522167	0.0858761	1.19834e-09	-0.522167	0.0858761	1.19834e-09	0.850464	-0.232975	0.252979	-0.513348	0.149099	-0.383867	0.393263	-0.64948	0.223943	-0.57952	0.167927	-0.616449	0.276053
cg16773803	20	42169558	L3MBTL;L3MBTL	3'UTR;Body	6	0.91559	0.130725	2.48906e-12	0.91559	0.130725	2.48906e-12	0.484206	1.17857	0.350182	1.06081	0.23638	0.642256	0.473935	1.24791	0.393903	0.506794	0.260463	0.96793	0.382707
cg04945608	20	43118723	TTPAL;TTPAL	3'UTR;3'UTR	6	0.82523	0.145922	1.55581e-08	0.821163	0.118767	4.7087e-12	0.213809	0.72604	0.290312	1.02808	0.21097	1.16496	0.429118	0.701018	0.357381	0.317165	0.255152	1.23609	0.354863
cg19433118	20	43977423	SDC4	TSS1500	6	0.697023	0.114547	1.16447e-09	0.697023	0.114547	1.16447e-09	0.571161	0.892366	0.320405	0.813762	0.200552	0.975354	0.423639	0.788699	0.292175	0.33712	0.223218	0.648399	0.484791
cg04575427	20	44144711	SPINT3	TSS1500	6	0.720593	0.119411	1.59414e-09	0.720593	0.119411	1.59414e-09	0.564475	0.633877	0.303424	0.885916	0.210169	0.419175	0.418383	0.570151	0.348621	0.930471	0.246189	0.186802	0.401949
cg08685909	20	57559409	TH1L	Body	6	0.553266	0.101546	5.08253e-08	0.539104	0.0859203	3.50846e-10	0.259515	0.724109	0.212665	0.484997	0.149608	0.772502	0.335425	0.955655	0.252395	0.294172	0.175742	0.337827	0.292269
cg18519834	20	60303394	CDH4	Body	6	0.650325	0.121088	7.84324e-08	0.650325	0.121088	7.84324e-08	0.502403	0.471397	0.316227	0.739945	0.219319	0.200437	0.381764	0.64871	0.348135	0.931177	0.234802	0.153509	0.490156
cg03582787	20	60492176	CDH4	Body	6	0.528272	0.0951258	2.80157e-08	0.528272	0.0951258	2.80157e-08	0.478608	0.157355	0.222309	0.696611	0.164577	0.821602	0.370836	0.543793	0.295035	0.514041	0.2002	0.459225	0.321972
cg04626878	20	62168809	PTK6	TSS200	6	0.363834	0.0622424	5.05238e-09	0.363834	0.0622424	5.05238e-09	0.646793	0.405088	0.229238	0.384367	0.0943541	0.394102	0.215783	0.483412	0.247881	0.151562	0.139786	0.500614	0.162563
cg16631083	21	33250039	HUNK	Body	6	0.728615	0.119471	1.06957e-09	0.721059	0.112825	1.64857e-10	0.36678	0.597541	0.31915	0.612865	0.18724	1.51233	0.526253	1.24361	0.34313	0.643334	0.240928	0.568772	0.303103
cg11852796	21	44062183			6	0.764741	0.126038	1.29883e-09	0.764741	0.126038	1.29883e-09	0.900941	0.681471	0.311889	0.967274	0.234742	0.874576	0.444304	0.56837	0.350736	0.624483	0.243158	0.898993	0.475942
cg10067062	21	44086302	PDE9A;PDE9A;PDE9A;PDE9A;PDE9A;PDE9A;PDE9A;PDE9A;PDE9A;PDE9A;PDE9A;PDE9A;PDE9A;PDE9A;PDE9A;PDE9A;PDE9A;PDE9A;PDE9A;PDE9A	Body;Body;5'UTR;Body;Body;Body;5'UTR;5'UTR;Body;Body;5'UTR;5'UTR;5'UTR;Body;5'UTR;Body;Body;Body;Body;Body	6	0.727895	0.135526	7.83432e-08	0.736685	0.092863	2.13849e-15	0.0991535	0.784077	0.276524	0.695552	0.150461	0.503701	0.348048	1.29177	0.297925	0.88148	0.188809	0.0907259	0.299631
cg21655830	21	44899410	C21orf84	TSS1500	6	0.862364	0.109115	2.71755e-15	0.862364	0.109115	2.71755e-15	0.487849	0.960356	0.338867	0.968444	0.185024	0.999032	0.396592	0.748028	0.323108	0.998991	0.231439	0.314927	0.295332
cg04321224	21	46341380	ITGB2;ITGB2	5'UTR;TSS1500	6	0.833428	0.148625	2.05188e-08	0.850633	0.133925	2.13143e-10	0.311089	1.243	0.337143	1.10778	0.242143	0.475128	0.419544	0.602178	0.427789	0.808053	0.283523	0.246231	0.397922
cg18663307	21	46341389	ITGB2;ITGB2	5'UTR;TSS1500	6	0.946646	0.150066	2.82292e-10	0.946646	0.150066	2.82292e-10	0.495867	1.12577	0.360061	1.32744	0.282093	0.489596	0.493546	0.910427	0.461439	0.797732	0.327981	0.492696	0.407312
cg14960373	21	47530705	COL6A2;COL6A2;COL6A2	5'UTR;5'UTR;5'UTR	5	0.75104	0.110329	9.9456e-12	0.75104	0.110329	9.9456e-12	0.798785	0.896512	0.277016	0.675527	0.183059	0.423561	0.354624	0.920543	0.324192	0.812883	0.21411	NA	NA
cg10811880	21	47536647	COL6A2;COL6A2;COL6A2	Body;Body;Body	6	0.667441	0.110483	1.53066e-09	0.667441	0.110483	1.53066e-09	0.809424	0.814472	0.314664	0.80392	0.198674	0.711574	0.4576	0.606301	0.31181	0.64725	0.221473	0.294914	0.300956
cg22117819	22	19556601			6	1.02678	0.137122	6.98899e-14	1.03321	0.115364	3.36504e-19	0.250509	1.26471	0.294805	1.2521	0.211995	1.37519	0.472954	1.03172	0.373276	0.893139	0.223455	0.389576	0.320975
cg22906524	22	19960525	ARVCF	Body	6	0.684832	0.119322	9.5029e-09	0.684832	0.119322	9.5029e-09	0.464082	0.344949	0.372741	0.666266	0.201243	0.613622	0.45441	1.23362	0.37807	0.822091	0.230847	0.275979	0.359389
cg22035738	22	21383321	SLC7A4	3'UTR	5	0.828524	0.132518	4.04763e-10	0.837473	0.113147	1.34534e-13	0.28205	0.432313	0.276827	0.993671	0.178102	0.72426	0.476353	1.25408	0.327263	0.684477	0.224777	NA	NA
cg11204680	22	23975441	C22orf43	TSS1500	6	0.606512	0.109733	3.25447e-08	0.606512	0.109733	3.25447e-08	0.781663	0.46868	0.278719	0.538261	0.19349	0.433949	0.4612	0.39574	0.345525	0.882718	0.221502	0.660921	0.31615
cg04335714	22	25799070			6	-0.684445	0.119571	1.03941e-08	-0.684445	0.119571	1.03941e-08	0.421735	-0.221271	0.33151	-0.890767	0.205466	-0.27047	0.473594	-0.9672	0.370162	-0.768021	0.24966	-0.445949	0.326923
cg06398881	22	28035524			6	0.507987	0.093759	6.02652e-08	0.507987	0.093759	6.02652e-08	0.504477	0.522295	0.249139	0.653996	0.165491	0.296908	0.376675	0.862694	0.296228	0.372389	0.188421	0.212084	0.262422
cg15504662	22	31644160	LIMK2;LIMK2;LIMK2	TSS200;TSS200;Body	6	-0.600226	0.0954824	3.25229e-10	-0.600226	0.0954824	3.25229e-10	0.731279	-0.246348	0.274535	-0.745311	0.148409	-0.543743	0.355488	-0.608139	0.337875	-0.589278	0.204328	-0.47973	0.310219
cg14043774	22	36013398	MB;MB;MB	TSS200;5'UTR;5'UTR	6	0.718863	0.114046	2.91476e-10	0.718863	0.114046	2.91476e-10	0.671744	0.902087	0.314274	0.8635	0.199877	0.582604	0.454642	0.936691	0.336286	0.539877	0.235676	0.368403	0.315534
cg07628580	22	38819702			6	0.55629	0.0961079	7.11522e-09	0.55629	0.0961079	7.11522e-09	0.785348	0.48064	0.296376	0.619985	0.158394	1.03648	0.4621	0.236394	0.301	0.543234	0.188181	0.554242	0.2767
cg17972162	22	39496387	APOBEC3H;APOBEC3H;APOBEC3H;APOBEC3H	Body;Body;Body;Body	6	0.868173	0.139461	4.8092e-10	0.868173	0.139461	4.8092e-10	0.426058	0.777021	0.371441	1.28567	0.24691	0.794927	0.537988	0.870841	0.394907	0.533719	0.28733	0.539629	0.415774
cg00792688	22	43793802			6	0.893828	0.113742	3.89156e-15	0.893828	0.113742	3.89156e-15	0.447902	1.00191	0.34372	1.02123	0.200534	0.492445	0.408641	1.30181	0.330689	0.793862	0.212314	0.413597	0.387858
cg09396892	22	45132934	PRR5;PRR5;PRR5;PRR5-ARHGAP8;PRR5;PRR5	Body;Body;Body;Body;Body;Body	6	0.917875	0.135996	1.4857e-11	0.917875	0.135996	1.4857e-11	0.471228	0.850282	0.399382	1.18266	0.233921	0.125497	0.566672	1.2434	0.437709	0.803068	0.27333	0.647557	0.35793
cg07959986	22	49068771	FAM19A5;FAM19A5	Body;Body	5	0.798537	0.123147	8.90627e-11	0.796177	0.119798	3.01117e-11	0.381676	0.771871	0.281948	0.867073	0.210033	1.26878	0.376944	0.99753	0.341665	0.458766	0.230468	NA	NA
cg20426710	22	50248907	ZBED4	5'UTR	6	-1.05814	0.18711	1.55706e-08	-1.05814	0.18711	1.55706e-08	0.447629	-1.16501	0.460578	-0.925178	0.317884	-0.0166669	0.652179	-0.796972	0.618714	-1.44237	0.400638	-1.61941	0.601973
cg17072671	X	39867034			5	1.37165	0.216345	2.29648e-10	1.37165	0.216345	2.29648e-10	0.977908	1.60785	0.461287	NA	NA	1.092	0.677711	1.32404	0.53514	1.35166	0.367842	1.31972	0.526623

## Sheet: Supplementary Table 4
Supplementary Table 4: Gene ontology results for schizophrenia associated differentially methylated positions
Lead Pathway										Collapsed Pathways
ID	Name	Type	Pathway		Pathway and Test List		P value	OR	GenesinTestListAndPathway	IDs	Names
			Probes	Genes	Probes	Genes
GO:0005578	proteinaceous extracellular matrix	cellular_component	8986	367	46	39	9.04e-12	1.04066	ADAMTS13|ADAMTS2|COL11A2|COL1A1|COL27A1|COL4A1|COL4A2|COL5A1|COL6A2|CRISPLD2|CRTAC1|DST|EGFLAM|FBN2|FGF1|GLDN|GPC6|GPLD1|HAPLN4|HSPG2|IL1RL1|LAMC3|LEPREL1|LRRN1|MATN2|MMP17|MMP28|NAV2|PRELP|PRSS36|PXDN|SMOC1|SMOC2|SOST|THSD4|TNC|TNXB|WNT2B|WNT7A	GO:0031012	extracellular matrix
GO:0098644	complex of collagen trimers	cellular_component	1214	20	10	7	6.23e-10	1.00852	COL11A2|COL1A1|COL27A1|COL4A1|COL4A2|COL5A1|TNXB	GO:0005583|GO:0098643	fibrillar collagen|banded collagen fibril
GO:0035330	regulation of hippo signaling	biological_process	281	11	4	4	1.94e-09	1.00613	JUB|NEK8|WWC1|WWC2
GO:0038084	vascular endothelial growth factor signaling pathway	biological_process	459	16	5	5	2.65e-09	1.00733	FLT1|FLT3|NRP2|PDGFRB|PRKD2
GO:0044420	extracellular matrix part	cellular_component	3858	121	21	18	7.68e-09	1.01958	COL11A2|COL1A1|COL27A1|COL4A1|COL4A2|COL5A1|DST|EGFLAM|FBN2|HSPG2|LAMC3|LEPREL1|MATN2|SMOC1|SMOC2|THSD4|TNC|TNXB
GO:0035924	cellular response to vascular endothelial growth factor stimulus	biological_process	810	31	8	7	1.29e-08	1.00974	DAB2IP|ERN1|FLT1|FLT3|NRP2|PDGFRB|PRKD2
GO:0048407	platelet-derived growth factor binding	molecular_function	413	11	5	4	1.89e-08	1.00572	COL1A1|COL4A1|COL5A1|PDGFRB
GO:0071435	potassium ion export	biological_process	522	10	5	4	2.73e-08	1.00539	KCND3|KCNIP2|KCNK18|KCNQ1
GO:0006911	phagocytosis, engulfment	biological_process	637	27	8	6	8.97e-08	1.00852	BAI1|BIN2|DOCK1|ELMO1|GSN|ITGB2
GO:0016601	Rac protein signal transduction	biological_process	520	20	5	5	1.88e-07	1.00713	CDH13|CYFIP1|ELMO1|EPS8|RHOU
GO:0015271	outward rectifier potassium channel activity	molecular_function	527	12	5	4	3.85e-07	1.00537	KCND3|KCNIP2|KCNK18|KCNQ1
GO:0016339	calcium-dependent cell-cell adhesion	biological_process	743	28	6	6	4.15e-07	1.00819	ARVCF|CDH13|CDH20|CDH23|DCHS1|JUB
GO:0032963	collagen metabolic process	biological_process	2517	80	18	12	1.36e-06	1.01318	ADAMTS2|COL11A2|COL13A1|COL1A1|COL4A1|COL4A2|COL5A1|COL6A2|LEPREL1|PLOD3|PRTN3|TNXB	GO:0044259	multicellular organismal macromolecule metabolic process
GO:0005938	cell cortex	cellular_component	6204	240	27	24	1.59e-06	1.02268	ARHGEF7|ASPH|BFSP2|BIN2|CD302|CLASP2|CTTNBP2|DLC1|DST|EEF1A1|EPS8|EXOC1|FGF1|FLNB|FRYL|GSN|INSC|MYO10|NEDD9|NRBP1|PRKCZ|SLC2A1|SPTB|TNFAIP2
GO:0005901	caveola	cellular_component	1969	81	14	11	1.79e-06	1.01311	ADRA1B|AKAP6|ATP2B4|CDH13|DLC1|F2R|KCNMA1|NOS1AP|NOS3|SLC22A6|SLC2A1
GO:0005614	interstitial matrix	cellular_component	510	14	4	4	1.96e-06	1.00542	EGFLAM|NAV2|SMOC2|TNC
GO:0035313	wound healing, spreading of epidermal cells	biological_process	227	10	3	3	2.36e-06	1.00454	COL5A1|JUB|WNT7A
GO:0002676	regulation of chronic inflammatory response	biological_process	159	11	3	3	2.52e-06	1.00475	ADORA2B|CYP19A1|TNF
GO:0047372	acylglycerol lipase activity	molecular_function	235	10	4	3	2.65e-06	1.00452	DAGLA|DAGLB|MGLL
GO:0031284	positive regulation of guanylate cyclase activity	biological_process	185	11	3	3	3.63e-06	1.00467	ADORA2B|GUCA1A|NOS3
GO:0046068	cGMP metabolic process	biological_process	828	33	6	6	5.71e-06	1.00792	ADCY2|ADCY3|ADCY9|PDE2A|PDE9A|RORA

## Sheet: Supplementary Table 5
Supplementary Table 5: Results of an interaction between age and DNA methylation for schizophrenia-associated DMPs.
ProbeID	N_cohorts	Schizophrenia vs controls							Age							Schizophrenia*Age Interaction
		Fixed effects model			Random effects model			Heterogeneity P-value	Fixed effects model			Random effects model			Heterogeneity P-value	Fixed effects model			Random effects model			Heterogeneity P-value
		Mean difference	SE	P value	Mean difference	SE	P value		Mean difference	SE	P value	Change per year	SE	P value		Mean difference per year	SE	P value	Mean difference	SE	P value
cg03916277	5	-0.00706378	0.00306933	0.0213686	-0.00706378	0.00306933	0.0213686	0.572	-0.000622677	5.36867e-05	4.20122e-31	-0.00062232	5.69592e-05	8.68624e-28	0.367246	0.000277872	6.60245e-05	2.56939e-05	0.000277872	6.60245e-05	2.56939e-05	0.567166
cg27517345	6	0.0106969	0.00491776	0.0296189	0.0106969	0.00491776	0.0296189	0.677831	-0.000430918	8.56989e-05	4.949e-07	-0.000510154	0.000192513	0.00804964	0.00316064	-0.000439575	0.000104961	2.81428e-05	-0.000439575	0.000104961	2.81428e-05	0.457184
cg04460609	6	-0.0116503	0.00604323	0.0538765	-0.0116503	0.00604323	0.0538765	0.636558	-0.00058084	0.000105771	3.98565e-08	-0.000488126	0.00027013	0.0707614	0.000129266	0.000500869	0.00013014	0.000118742	0.000500869	0.00013014	0.000118742	0.714123
cg23939182	6	-0.00358834	0.00388939	0.356217	-0.00358834	0.00388939	0.356217	0.760239	-0.000456337	6.7903e-05	1.81199e-11	-0.000442209	7.85793e-05	1.8279e-08	0.30647	0.000285609	8.29004e-05	0.000570613	0.000285609	8.29004e-05	0.000570613	0.721603
cg14338073	6	-0.00401936	0.00359468	0.263506	-0.00401936	0.00359468	0.263506	0.58604	-0.000324404	6.26789e-05	2.27121e-07	-0.000317784	9.43321e-05	0.000755024	0.108507	0.000263887	7.70534e-05	0.000615414	0.000263887	7.70534e-05	0.000615414	0.803688
cg14995235	6	-0.00238709	0.00349254	0.494302	-0.00238709	0.00349254	0.494302	0.881021	-0.000404564	6.10788e-05	3.50453e-11	-0.000404564	6.10788e-05	3.50453e-11	0.691892	0.000249725	7.48016e-05	0.000842319	0.000249725	7.48016e-05	0.000842319	0.804522
cg09866569	6	0.00575282	0.00378787	0.128826	0.00575282	0.00378787	0.128826	0.694505	0.000584061	6.5281e-05	3.6567e-19	0.000584061	6.5281e-05	3.6567e-19	0.886054	-0.000259782	8.06249e-05	0.00127254	-0.000259782	8.06249e-05	0.00127254	0.476126
cg13797580	6	-0.00489491	0.00330108	0.138122	-0.00489491	0.00330108	0.138122	0.743307	-0.0002061	5.74125e-05	0.000330918	-0.0002061	5.74125e-05	0.000330918	0.593823	0.000227217	7.07329e-05	0.00131664	0.000227217	7.07329e-05	0.00131664	0.695071
cg14002328	6	0.0159763	0.00335928	1.97583e-06	0.0159763	0.00335928	1.97583e-06	0.724785	9.25797e-05	5.90391e-05	0.116856	9.25797e-05	5.90391e-05	0.116856	0.709837	-0.000231153	7.19587e-05	0.00131679	-0.000231153	7.19587e-05	0.00131679	0.694685
cg14469436	6	-0.00558676	0.00349355	0.109784	-0.00558676	0.00349355	0.109784	0.75698	-2.26315e-05	6.03911e-05	0.707847	-3.87748e-05	7.94868e-05	0.625681	0.210564	0.000237538	7.46517e-05	0.00146283	0.000237538	7.46517e-05	0.00146283	0.702492
cg19188359	6	-0.00349906	0.0032169	0.276724	-0.00349906	0.0032169	0.276724	0.533203	-0.000212096	5.60235e-05	0.000153192	-0.000207461	7.60965e-05	0.00640517	0.179119	0.000216404	6.87615e-05	0.00164859	0.000216404	6.87615e-05	0.00164859	0.557397
cg22988346	6	-0.00214234	0.00356312	0.547672	-0.00214234	0.00356312	0.547672	0.930433	-0.000518791	6.23297e-05	8.55249e-17	-0.000516436	8.90874e-05	6.75288e-09	0.152493	0.000240413	7.66072e-05	0.00169953	0.000240413	7.66072e-05	0.00169953	0.780959
cg00900242	6	-0.00481309	0.00380067	0.205377	-0.00481309	0.00380067	0.205377	0.733058	-0.000260581	6.75322e-05	0.000114027	-0.000264825	7.87706e-05	0.000773872	0.298735	0.000257029	8.27165e-05	0.00188775	0.000257029	8.27165e-05	0.00188775	0.656939
cg04368094	6	0.0043585	0.00379717	0.25104	0.00434916	0.00381573	0.25437	0.412006	0.000421976	6.71388e-05	3.2757e-10	0.00041514	9.18909e-05	6.25004e-06	0.183368	-0.000249748	8.19732e-05	0.00231369	-0.000249556	8.24311e-05	0.00246625	0.411762
cg05380885	6	-0.00226717	0.00404872	0.575499	-0.00226717	0.00404872	0.575499	0.466109	-0.000492472	7.13014e-05	4.95357e-12	-0.00050266	0.000105546	1.91226e-06	0.119425	0.0002632	8.72052e-05	0.00254305	0.0002632	8.72052e-05	0.00254305	0.476288
cg23702610	6	0.00351211	0.00311153	0.259008	0.00338328	0.00336317	0.314426	0.356218	0.00039639	5.42417e-05	2.71438e-13	0.000398181	6.29531e-05	2.53156e-10	0.312236	-0.000247633	6.66328e-05	0.000202099	-0.000237749	7.88776e-05	0.00257697	0.288418
cg09637172	5	-0.00308879	0.00487383	0.526244	-0.00308879	0.00487383	0.526244	0.723885	-0.000516485	8.59044e-05	1.82888e-09	-0.000495602	0.000125876	8.24297e-05	0.135964	0.000315885	0.000105039	0.00263564	0.000315885	0.000105039	0.00263564	0.461408
cg17444521	6	-0.00372092	0.00360104	0.301467	-0.00372092	0.00360104	0.301467	0.749926	-0.000376378	6.31172e-05	2.47418e-09	-0.000361072	7.60504e-05	2.05644e-06	0.27393	0.000229838	7.70547e-05	0.00285634	0.000229838	7.70547e-05	0.00285634	0.81399
cg20738274	6	-0.00520163	0.00407364	0.201638	-0.00520163	0.00407364	0.201638	0.67587	-9.85712e-05	7.05957e-05	0.162631	-9.1957e-05	9.19942e-05	0.317506	0.213384	0.000254511	8.68137e-05	0.00337127	0.000254511	8.68137e-05	0.00337127	0.598611
cg17486097	6	0.00585317	0.0051242	0.253346	0.00585317	0.0051242	0.253346	0.948696	0.00120762	8.92107e-05	9.49096e-42	0.00120762	8.92107e-05	9.49096e-42	0.498106	-0.00031692	0.000109269	0.00372717	-0.00031692	0.000109269	0.00372717	0.795038
cg09923953	6	-0.00500959	0.00479859	0.296499	-0.00500959	0.00479859	0.296499	0.913601	-0.000250999	8.35355e-05	0.00265845	-0.000303818	0.000134091	0.023466	0.0783677	0.000297104	0.000102805	0.00385283	0.000297104	0.000102805	0.00385283	0.762888
cg08111960	6	-0.00419478	0.00405509	0.300927	-0.00419478	0.00405509	0.300927	0.863245	-0.000269114	7.10016e-05	0.000150498	-0.000270863	7.45658e-05	0.000280645	0.381699	0.000251583	8.71713e-05	0.00390078	0.000251583	8.71713e-05	0.00390078	0.728449
cg09627247	6	-0.0041142	0.00513041	0.422597	-0.0041142	0.00513041	0.422597	0.537583	-0.00048655	9.09629e-05	8.84964e-08	-0.000482794	0.000108308	8.28808e-06	0.288428	0.000315565	0.000111032	0.00448172	0.000315565	0.000111032	0.00448172	0.504353
cg13657200	6	0.0163023	0.00363011	7.09423e-06	0.0163023	0.00363011	7.09423e-06	0.559093	-0.000673341	6.3598e-05	3.40719e-26	-0.000673341	6.3598e-05	3.40719e-26	0.915727	-0.000221775	7.82233e-05	0.00458035	-0.000221775	7.82233e-05	0.00458035	0.571992
cg16407998	6	-0.00140418	0.00380981	0.712448	-0.00140418	0.00380981	0.712448	0.808469	-0.000253359	6.66968e-05	0.000145476	-0.000253045	6.82327e-05	0.000208436	0.399442	0.000231769	8.18775e-05	0.00464487	0.000231769	8.18775e-05	0.00464487	0.832491
cg11264947	6	-0.00351754	0.00359413	0.327732	-0.00351754	0.00359413	0.327732	0.63793	-0.000453185	6.24631e-05	4.00941e-13	-0.000450427	6.55387e-05	6.3002e-12	0.385048	0.000217439	7.68326e-05	0.00465435	0.000217439	7.68326e-05	0.00465435	0.630096
cg02987618	6	-0.000884281	0.00387022	0.81927	-0.000884281	0.00387022	0.81927	0.987456	-0.000374838	6.74035e-05	2.68078e-08	-0.000374838	6.74035e-05	2.68078e-08	0.420288	0.000228515	8.31128e-05	0.00596942	0.000228515	8.31128e-05	0.00596942	0.841226
cg04264002	6	-0.00367968	0.00438977	0.401896	-0.00367968	0.00438977	0.401896	0.715262	-0.000350822	7.69157e-05	5.0882e-06	-0.000355935	0.000104418	0.000652615	0.187057	0.000255831	9.33053e-05	0.00610913	0.000255831	9.33053e-05	0.00610913	0.526432
cg18828861	5	0.00621228	0.00775281	0.422961	0.00621228	0.00775281	0.422961	0.499791	-0.00103616	0.000137889	5.71408e-14	-0.00104743	0.000247536	2.32235e-05	0.0348162	-0.000461134	0.000168249	0.00612928	-0.000461134	0.000168249	0.00612928	0.451829
cg08592104	6	-0.00317253	0.00449922	0.48073	-0.00317253	0.00449922	0.48073	0.921057	-0.000450826	7.88901e-05	1.09955e-08	-0.000450757	7.89884e-05	1.15246e-08	0.414985	0.00025971	9.67383e-05	0.00726015	0.00025971	9.67383e-05	0.00726015	0.966194
cg12315311	6	-0.000521123	0.00460365	0.909874	-0.000521123	0.00460365	0.909874	0.640757	-0.000480939	8.00052e-05	1.83992e-09	-0.000493323	9.4429e-05	1.74839e-07	0.302133	0.000258962	9.78827e-05	0.00815366	0.000258962	9.78827e-05	0.00815366	0.452219
cg13868356	6	0.0221036	0.004021	3.86191e-08	0.0221036	0.004021	3.86191e-08	0.526731	7.21137e-05	7.12788e-05	0.311676	8.64108e-05	9.79788e-05	0.377813	0.16964	-0.000273579	8.60616e-05	0.00147847	-0.000276465	0.00010564	0.00886952	0.238116
cg23598089	6	-0.00776467	0.00526589	0.140341	-0.00741835	0.0073346	0.311816	0.127186	0.000117731	9.33601e-05	0.207295	5.64022e-05	0.000168294	0.737519	0.0262994	0.000456821	0.000113072	5.34271e-05	0.000439139	0.000168779	0.00927212	0.0830125
cg01613048	6	-0.00364274	0.00391648	0.352317	-0.00364274	0.00391648	0.352317	0.622345	-0.000256511	6.79952e-05	0.000161631	-0.000222721	9.01273e-05	0.0134669	0.20476	0.000216994	8.34632e-05	0.0093257	0.000216994	8.34632e-05	0.0093257	0.425279
cg14761227	6	-0.00251128	0.00339682	0.459723	-0.00251128	0.00339682	0.459723	0.780413	-0.00038355	6.11457e-05	3.54783e-10	-0.00038355	6.11457e-05	3.54783e-10	0.602323	0.000188732	7.31284e-05	0.00985624	0.000188732	7.31284e-05	0.00985624	0.550316
cg23601905	6	0.00547962	0.00400643	0.171403	0.00543538	0.00415692	0.191026	0.389537	0.000506422	6.96307e-05	3.51665e-13	0.00050585	7.71366e-05	5.45911e-11	0.352394	-0.000267703	8.51857e-05	0.00167466	-0.000261176	0.000101792	0.0102943	0.287061
cg06095802	6	-0.00333564	0.00449133	0.457673	-0.00333564	0.00449133	0.457673	0.823031	-0.000459193	7.91272e-05	6.50528e-09	-0.000459193	7.91272e-05	6.50528e-09	0.629085	0.000248596	9.69873e-05	0.0103717	0.000248596	9.69873e-05	0.0103717	0.91898
cg25105917	5	-0.00136888	0.00283965	0.629763	-0.00136888	0.00283965	0.629763	0.488398	-0.000409973	5.01863e-05	3.10907e-16	-0.000412517	8.16303e-05	4.33839e-07	0.0784801	0.000166973	6.14014e-05	0.00654065	0.000164903	6.44335e-05	0.0104891	0.370907
cg21930712	6	-0.0025661	0.00351699	0.465617	-0.0025661	0.00351699	0.465617	0.834689	-0.000309068	6.11444e-05	4.30998e-07	-0.000314474	8.3815e-05	0.000175431	0.17742	0.000189252	7.53405e-05	0.0120064	0.000189252	7.53405e-05	0.0120064	0.84745
cg02489219	6	-0.000502036	0.00368235	0.891556	-0.000502036	0.00368235	0.891556	0.45437	-0.000384089	6.33539e-05	1.33946e-09	-0.000384138	6.83004e-05	1.86313e-08	0.362607	0.000198453	7.90952e-05	0.012106	0.000198453	7.90952e-05	0.012106	0.444387
cg02290880	6	-0.00790512	0.00428294	0.0649327	-0.00784351	0.00439394	0.0742492	0.394246	-0.000121986	7.59795e-05	0.108381	-0.000143841	0.000102491	0.160484	0.190003	0.000323124	9.18122e-05	0.000432528	0.000302128	0.000121247	0.0127082	0.17695
cg17701146	6	-0.0023006	0.00502597	0.647137	-0.0023006	0.00502597	0.647137	0.885003	-0.000631695	8.8315e-05	8.50566e-13	-0.000607681	0.000150628	5.47617e-05	0.0455794	0.000269305	0.0001081	0.0127288	0.000269305	0.0001081	0.0127288	0.918489
cg27514730	6	0.00229161	0.00385937	0.552661	0.00229161	0.00385937	0.552661	0.718189	-0.000461889	6.80831e-05	1.16744e-11	-0.000461889	6.80831e-05	1.16744e-11	0.542563	0.000207584	8.34157e-05	0.0128264	0.000207584	8.34157e-05	0.0128264	0.565196
cg11042505	5	-0.00253019	0.00343695	0.461626	-0.00253019	0.00343695	0.461626	0.762948	-0.000227522	6.01276e-05	0.000154339	-0.000227522	6.01276e-05	0.000154339	0.957442	0.000184933	7.43198e-05	0.0128343	0.000184933	7.43198e-05	0.0128343	0.674885
cg00252934	6	0.0187182	0.00373535	5.41218e-07	0.0188406	0.00483641	9.7963e-05	0.198018	8.92791e-05	6.52213e-05	0.171042	5.8909e-05	8.65196e-05	0.495951	0.202637	-0.000218779	7.99396e-05	0.00620387	-0.00022529	9.15262e-05	0.0138362	0.307857
cg01573635	6	-0.00288241	0.00531931	0.587903	-0.00320372	0.00601317	0.594183	0.312563	-0.000187212	9.32876e-05	0.0447681	-0.000187212	9.32876e-05	0.0447681	0.492349	0.000281757	0.000115005	0.0142876	0.000281757	0.000115005	0.0142876	0.485549
cg13475822	6	0.0149492	0.00337902	9.68324e-06	0.0149492	0.00337902	9.68324e-06	0.667124	7.7564e-05	5.8501e-05	0.184887	7.7564e-05	5.8501e-05	0.184887	0.924853	-0.000175125	7.17506e-05	0.014657	-0.000175125	7.17506e-05	0.014657	0.690996
cg16177163	6	0.0227416	0.00575273	7.71201e-05	0.0227416	0.00575273	7.71201e-05	0.569479	-0.000235817	0.000103129	0.0222181	-0.000235586	0.000104166	0.0237199	0.408923	-0.000301764	0.000123831	0.0148137	-0.000301764	0.000123831	0.0148137	0.442806
cg02625481	5	-0.00391481	0.00445562	0.379606	-0.00391481	0.00445562	0.379606	0.429515	-0.000389524	7.96266e-05	9.98771e-07	-0.000419767	0.000127086	0.000956536	0.0819023	0.000269383	9.7016e-05	0.0054916	0.000274065	0.000113359	0.0156204	0.277386
cg25735572	6	-0.00321898	0.00371838	0.386657	-0.00327275	0.00391642	0.403353	0.374403	-0.000484082	6.50344e-05	9.80635e-14	-0.000503944	8.58399e-05	4.33837e-09	0.20774	0.000232283	8.03169e-05	0.00382704	0.00023473	9.7162e-05	0.015698	0.263398
cg20426710	6	0.00628227	0.00666278	0.345737	0.00628227	0.00666278	0.345737	0.43774	-0.00202475	0.000116854	2.93702e-67	-0.00203205	0.000127841	6.84998e-57	0.35404	-0.000380483	0.000143218	0.00789165	-0.000412193	0.000171457	0.016214	0.272852
cg10772185	6	-0.00502017	0.00456419	0.271374	-0.00524696	0.00559798	0.348606	0.232492	-0.000501737	8.07103e-05	5.08312e-10	-0.000501737	8.07103e-05	5.08312e-10	0.549137	0.000272716	9.81882e-05	0.00547822	0.000277896	0.000116183	0.0167626	0.270338
cg11679124	6	-0.00358271	0.00418933	0.392441	-0.00358271	0.00418933	0.392441	0.692936	-0.000396801	7.33946e-05	6.43019e-08	-0.000387703	0.000138128	0.00500295	0.0305716	0.000214576	8.98002e-05	0.0168722	0.000214576	8.98002e-05	0.0168722	0.640519
cg16577947	6	-0.000767434	0.0039483	0.845885	-0.000767434	0.0039483	0.845885	0.906535	-0.000215273	6.86957e-05	0.00172605	-0.00024018	9.88811e-05	0.0151416	0.164424	0.000198896	8.48671e-05	0.0190976	0.000198896	8.48671e-05	0.0190976	0.604926
cg25960769	6	0.00193204	0.005007	0.699595	0.00193204	0.005007	0.699595	0.984167	0.000404248	8.78144e-05	4.15589e-06	0.000404248	8.78144e-05	4.15589e-06	0.836383	-0.000250582	0.000107371	0.0196068	-0.000250582	0.000107371	0.0196068	0.94017
cg27230705	6	-0.00375491	0.00579617	0.517098	-0.00375491	0.00579617	0.517098	0.81675	-0.000562632	0.000100975	2.51847e-08	-0.000582972	0.000195	0.00279346	0.0150319	0.000288664	0.000123913	0.0198286	0.000288664	0.000123913	0.0198286	0.805744
cg18502099	6	-0.000701579	0.00350774	0.841474	-0.000701579	0.00350774	0.841474	0.540673	-0.000779054	6.13396e-05	5.86298e-37	-0.000779054	6.13396e-05	5.86298e-37	0.466613	0.000173875	7.50702e-05	0.0205496	0.000173875	7.50702e-05	0.0205496	0.729976
cg20450058	6	-0.00103016	0.00384036	0.788511	-0.00103016	0.00384036	0.788511	0.449274	-0.000372764	6.76714e-05	3.62031e-08	-0.000372764	6.76714e-05	3.62031e-08	0.613916	0.00018862	8.26534e-05	0.0224862	0.00018862	8.26534e-05	0.0224862	0.465465
cg17410660	6	-0.000752912	0.00342718	0.826114	-0.000752912	0.00342718	0.826114	0.735951	-0.000248753	6.06466e-05	4.10168e-05	-0.000240449	8.71769e-05	0.00581253	0.131556	0.000168942	7.41301e-05	0.0226673	0.000168942	7.41301e-05	0.0226673	0.743675
cg26876077	6	-0.00185582	0.00375175	0.620844	-0.00185582	0.00375175	0.620844	0.74153	-0.000240583	6.52988e-05	0.000229299	-0.000240583	6.52988e-05	0.000229299	0.79297	0.000182378	8.01527e-05	0.0228831	0.000182378	8.01527e-05	0.0228831	0.712968
cg17654419	5	0.000121641	0.00347697	0.972092	0.000121641	0.00347697	0.972092	0.609595	-4.10393e-05	6.08791e-05	0.50024	-7.09042e-05	0.000130376	0.58655	0.00663177	0.000170466	7.50071e-05	0.0230461	0.000170466	7.50071e-05	0.0230461	0.553474
cg08638960	5	-0.000298208	0.00388307	0.938785	-0.000298208	0.00388307	0.938785	0.970571	-0.000240769	6.85881e-05	0.000447507	-0.000240769	6.85881e-05	0.000447507	0.499306	0.000190472	8.39526e-05	0.02328	0.000190472	8.39526e-05	0.02328	0.960984
cg02501827	6	0.00462661	0.00608865	0.447329	0.0054344	0.00888661	0.540851	0.108558	0.000347916	0.000106508	0.00108859	0.000289172	0.0001608	0.0721243	0.106277	-0.000363926	0.000130573	0.00531762	-0.000372789	0.000164752	0.0236524	0.220552
cg00085123	6	0.0124482	0.00467611	0.00776599	0.0105073	0.00706157	0.136765	0.0787762	0.000525038	8.30308e-05	2.55864e-10	0.000531162	0.000139418	0.000139047	0.056593	-0.00044326	0.000100495	1.03017e-05	-0.000389137	0.000172355	0.0239608	0.0301413
cg15832662	6	0.000876452	0.0041404	0.832355	0.000876452	0.0041404	0.832355	0.772607	-0.000474273	7.21283e-05	4.85209e-11	-0.000474273	7.21283e-05	4.85209e-11	0.668585	0.000198733	8.80904e-05	0.02407	0.000198733	8.80904e-05	0.02407	0.842537
cg07068655	5	0.00170759	0.00470944	0.716912	0.00170759	0.00470944	0.716912	0.893866	-0.000482668	8.34449e-05	7.28275e-09	-0.000522855	0.00011529	5.75658e-06	0.17103	0.000228123	0.000101871	0.0251344	0.000228123	0.000101871	0.0251344	0.969314
cg01976921	6	-0.00202992	0.00390964	0.603616	-0.00202992	0.00390964	0.603616	0.808169	-2.44551e-05	6.81421e-05	0.719682	-2.44551e-05	6.81421e-05	0.719682	0.467711	0.000187358	8.36772e-05	0.0251523	0.000187358	8.36772e-05	0.0251523	0.601969
cg13840174	6	-0.00230136	0.00464135	0.620009	-0.00236802	0.00548698	0.666054	0.269318	-0.000411563	8.15702e-05	4.52303e-07	-0.000411563	8.15702e-05	4.52303e-07	0.500794	0.00024986	9.98389e-05	0.0123272	0.000244971	0.000109674	0.0255078	0.339311
cg20901032	6	-0.00195355	0.00389796	0.61625	-0.00195355	0.00389796	0.61625	0.822123	-0.000286938	6.95738e-05	3.71979e-05	-0.00031124	9.48995e-05	0.00103926	0.163119	0.000187564	8.45616e-05	0.0265498	0.000187564	8.45616e-05	0.0265498	0.541815
cg09326832	6	0.00109235	0.00541133	0.840024	0.00109235	0.00541133	0.840024	0.887567	0.000348465	9.54174e-05	0.0002602	0.000348465	9.54174e-05	0.0002602	0.659755	-0.000257742	0.000116223	0.0265789	-0.000257742	0.000116223	0.0265789	0.730378
cg13634423	6	-0.00114343	0.00442631	0.796155	-0.00180656	0.00500354	0.718057	0.298639	-0.000355559	7.93846e-05	7.50134e-06	-0.000355181	0.000110125	0.00125867	0.139293	0.000211398	9.54461e-05	0.0267711	0.000211398	9.54461e-05	0.0267711	0.461834
cg25707298	6	-2.94811e-05	0.00449229	0.994764	-2.94811e-05	0.00449229	0.994764	0.632174	-0.000334992	7.80127e-05	1.75432e-05	-0.000334992	7.80127e-05	1.75432e-05	0.595673	0.000210864	9.58792e-05	0.0278592	0.000210864	9.58792e-05	0.0278592	0.785889
cg09721612	6	-0.00324373	0.0055349	0.557841	-0.00324373	0.0055349	0.557841	0.81869	-0.000457275	9.73271e-05	2.62299e-06	-0.000457275	9.73271e-05	2.62299e-06	0.772032	0.000260109	0.000119219	0.0291264	0.000260109	0.000119219	0.0291264	0.783649
cg24158157	5	0.00163542	0.00454806	0.719156	0.00163542	0.00454806	0.719156	0.676496	-0.000383559	8.03042e-05	1.7852e-06	-0.000398852	9.76931e-05	4.45151e-05	0.27315	0.000209746	9.76598e-05	0.0317361	0.000209746	9.76598e-05	0.0317361	0.771214
cg14151372	6	-0.00201882	0.00424001	0.633978	-0.00201882	0.00424001	0.633978	0.49146	-0.000194159	7.50344e-05	0.00966452	-0.000194159	7.50344e-05	0.00966452	0.460289	0.000215921	9.20504e-05	0.0189924	0.000210977	9.87553e-05	0.0326499	0.361327
cg01160452	6	-0.00145149	0.00386018	0.706904	-0.00149919	0.00433288	0.72934	0.31659	-0.000220718	6.75058e-05	0.00107693	-0.000206883	7.99778e-05	0.00968842	0.290657	0.000209152	8.25955e-05	0.0113334	0.000207511	9.75573e-05	0.0334149	0.278714
cg11837181	6	-0.000404372	0.00378283	0.914871	-0.000404372	0.00378283	0.914871	0.687217	-0.000397339	6.54771e-05	1.29222e-09	-0.000397339	6.54771e-05	1.29222e-09	0.53794	0.000171609	8.07301e-05	0.0335268	0.000171609	8.07301e-05	0.0335268	0.658154
cg04215950	6	0.00270674	0.00395163	0.493365	0.00270674	0.00395163	0.493365	0.951039	-0.000175699	6.90913e-05	0.0109906	-0.000175699	6.90913e-05	0.0109906	0.979334	0.000179788	8.49643e-05	0.0343414	0.000179788	8.49643e-05	0.0343414	0.857497
cg08239103	6	-0.000144731	0.0043372	0.97338	-0.000144731	0.0043372	0.97338	0.871552	-0.000452783	7.72331e-05	4.55818e-09	-0.00046385	9.59913e-05	1.35029e-06	0.237833	0.000197183	9.31986e-05	0.0343683	0.000197183	9.31986e-05	0.0343683	0.925155
cg16201146	6	0.0172209	0.00420825	4.27349e-05	0.0172209	0.00420825	4.27349e-05	0.546082	-0.00107911	7.36383e-05	1.26553e-48	-0.00107911	7.36383e-05	1.26553e-48	0.469815	-0.000232363	9.05735e-05	0.010304	-0.00025269	0.00012013	0.0354246	0.190396
cg09530108	6	0.00167299	0.0036899	0.650264	0.00113828	0.00474215	0.810303	0.199387	-0.000586684	6.51931e-05	2.27431e-19	-0.000601434	9.35162e-05	1.26487e-10	0.137689	0.000180134	7.9736e-05	0.023875	0.000182013	8.68357e-05	0.0360763	0.343808
cg23398700	6	0.00153164	0.00351951	0.663429	0.00153164	0.00351951	0.663429	0.490079	0.00041452	6.09077e-05	1.00552e-11	0.000424137	7.59712e-05	2.36582e-08	0.275803	-0.000156888	7.50495e-05	0.0365763	-0.000156888	7.50495e-05	0.0365763	0.691517
cg23598480	6	0.0165505	0.00403187	4.04456e-05	0.0165505	0.00403187	4.04456e-05	0.856441	0.000363507	7.024e-05	2.27645e-07	0.000321687	9.80837e-05	0.00103912	0.171898	-0.00017992	8.61545e-05	0.036767	-0.00017992	8.61545e-05	0.036767	0.626866
cg11619602	6	0.0207917	0.00533799	9.81825e-05	0.0207119	0.00677768	0.00224391	0.207079	2.95932e-05	9.37865e-05	0.752353	2.95932e-05	9.37865e-05	0.752353	0.79834	-0.00027034	0.000114705	0.0184314	-0.000268662	0.000129101	0.0374322	0.314823
cg01186595	6	-0.000521504	0.00423304	0.90195	-0.000521504	0.00423304	0.90195	0.926601	-0.000354712	7.46234e-05	2.00065e-06	-0.000369813	0.000150681	0.0141168	0.00785903	0.000189284	9.13699e-05	0.0383002	0.000189284	9.13699e-05	0.0383002	0.862484
cg02276274	6	0.0144861	0.00391175	0.000212869	0.0142418	0.00440003	0.00120903	0.319189	-0.000165177	6.84101e-05	0.0157566	-0.000176876	7.61792e-05	0.0202412	0.342258	-0.000181396	8.40837e-05	0.0309798	-0.00018097	8.79314e-05	0.0395819	0.382654
cg21214743	5	-0.000545522	0.00416848	0.89588	-0.000545522	0.00416848	0.89588	0.542836	-0.000402834	7.28376e-05	3.19191e-08	-0.00040015	8.03458e-05	6.34713e-07	0.338508	0.000184676	9.00269e-05	0.0402333	0.000184676	9.00269e-05	0.0402333	0.648511
cg04571584	6	0.0146639	0.0038921	0.000164822	0.0146718	0.00487029	0.0025909	0.233967	-0.00020787	6.71548e-05	0.00196561	-0.00020787	6.71548e-05	0.00196561	0.514524	-0.000172711	8.25942e-05	0.0365206	-0.000172283	8.40702e-05	0.0404352	0.403892
cg26263239	6	0.000329553	0.00376844	0.930313	0.000329553	0.00376844	0.930313	0.907593	-0.000203804	6.68477e-05	0.00229775	-0.000203804	6.68477e-05	0.00229775	0.925252	0.000167706	8.18785e-05	0.040537	0.000167706	8.18785e-05	0.040537	0.789324
cg01601926	6	-0.000545488	0.00328528	0.868126	-0.000545488	0.00328528	0.868126	0.871323	0.000157709	5.70825e-05	0.00573027	0.000157709	5.70825e-05	0.00573027	0.508308	0.000144762	7.06959e-05	0.0405927	0.000144762	7.06959e-05	0.0405927	0.656607
cg20653009	6	0.00110556	0.00409687	0.787272	0.00110556	0.00409687	0.787272	0.583995	0.000425607	7.06325e-05	1.6843e-09	0.000429229	8.52737e-05	4.81481e-07	0.292394	-0.000180013	8.69257e-05	0.0383694	-0.000181528	8.86794e-05	0.0406568	0.403543
cg07469647	5	-0.00302406	0.00498043	0.543726	-0.0016725	0.00615604	0.785864	0.225689	-0.000267557	8.7812e-05	0.00231193	-0.000267557	8.7812e-05	0.00231193	0.954722	0.000261955	0.000107583	0.0148951	0.000245292	0.000120818	0.0423289	0.318343
cg22478317	6	-0.00121425	0.004745	0.798028	-0.00120584	0.00478005	0.800837	0.409765	-0.000438409	8.33183e-05	1.4261e-07	-0.00041944	0.000129363	0.00118548	0.0905335	0.000206371	0.000101782	0.0426038	0.000206371	0.000101782	0.0426038	0.442158
cg06943845	6	-0.00275261	0.00385062	0.474703	-0.00239521	0.00470357	0.61059	0.253589	-0.000362006	6.65844e-05	5.42439e-08	-0.000362006	6.65844e-05	5.42439e-08	0.558888	0.000200252	8.24549e-05	0.0151563	0.00019109	9.45265e-05	0.0432232	0.313486
cg06175907	6	0.0144101	0.00367999	9.01081e-05	0.0144101	0.00367999	9.01081e-05	0.497607	-0.00013788	6.50855e-05	0.0341379	-0.000134176	0.000104623	0.199679	0.0834909	-0.000178724	7.9536e-05	0.0246348	-0.000192113	9.51906e-05	0.0435708	0.27408
cg00777315	6	-0.00551381	0.00436515	0.206537	-0.00518594	0.00575391	0.367435	0.173595	-0.000165787	7.6545e-05	0.0303207	-0.000174615	0.000109217	0.109865	0.141263	0.000276297	9.369e-05	0.0031875	0.000258206	0.000128873	0.0451153	0.144952
cg27416372	5	0.00266948	0.00330727	0.419577	0.00337328	0.00413307	0.414404	0.212231	0.000489832	5.87245e-05	7.35559e-17	0.000525308	8.46636e-05	5.48187e-10	0.145756	-0.000164505	7.20084e-05	0.0223406	-0.000197523	9.90185e-05	0.0460636	0.157462
cg26980692	6	3.27076e-06	0.0043625	0.999402	3.27076e-06	0.0043625	0.999402	0.727079	0.000368837	7.53441e-05	9.81221e-07	0.000368837	7.53441e-05	9.81221e-07	0.520804	-0.000183586	9.23778e-05	0.0468855	-0.000183586	9.23778e-05	0.0468855	0.500745
cg03935060	6	-0.00355039	0.00433273	0.412539	-0.00343678	0.00449327	0.444347	0.387233	-0.000394012	7.53246e-05	1.68729e-07	-0.000391132	8.94152e-05	1.21801e-05	0.290302	0.000231038	9.24101e-05	0.0124146	0.000214209	0.00010833	0.0479989	0.288712
cg12581691	6	0.00115523	0.00393516	0.769089	0.00115523	0.00393516	0.769089	0.859873	0.000109579	6.83765e-05	0.109028	0.000123242	0.000102704	0.230154	0.108806	-0.000166667	8.43682e-05	0.0482143	-0.000166667	8.43682e-05	0.0482143	0.885272
cg08826152	6	0.000582462	0.00569128	0.918485	0.000582462	0.00569128	0.918485	0.895222	0.000499224	9.86559e-05	4.18691e-07	0.000499224	9.86559e-05	4.18691e-07	0.856657	-0.000239006	0.000121058	0.0483462	-0.000239006	0.000121058	0.0483462	0.762418
cg23235384	6	-0.00133131	0.00313219	0.670807	-0.00133131	0.00313219	0.670807	0.47634	-0.000141384	5.43742e-05	0.00931691	-0.00010091	9.88154e-05	0.30716	0.0266431	0.000145848	6.6978e-05	0.0294399	0.000140389	7.11541e-05	0.0484926	0.368568
cg02499967	6	-0.00216904	0.00380513	0.568657	-0.00219355	0.00488019	0.653084	0.186237	-0.000188387	6.89362e-05	0.00628043	-0.000188387	6.89362e-05	0.00628043	0.5075	0.000201899	8.28818e-05	0.0148514	0.000196487	9.96421e-05	0.048618	0.248326
cg00983803	6	1.26242e-05	0.00354124	0.997156	-0.000280259	0.00408358	0.945283	0.290122	-0.000275577	6.23912e-05	1.00118e-05	-0.000273478	8.17756e-05	0.000825064	0.202138	0.000151063	7.66206e-05	0.048658	0.000151063	7.66206e-05	0.048658	0.42983
cg13295314	5	0.00222771	0.00342357	0.515241	0.00222771	0.00342357	0.515241	0.409554	-0.000325355	6.02731e-05	6.73811e-08	-0.000325355	6.02731e-05	6.73811e-08	0.552244	0.000154544	7.44734e-05	0.0379723	0.0001538	7.85319e-05	0.050179	0.364448
cg02534164	6	0.00102231	0.00406576	0.801471	0.00102231	0.00406576	0.801471	0.629039	-0.000434764	7.17468e-05	1.36373e-09	-0.000450646	0.000134042	0.000773856	0.0186331	0.000169883	8.74557e-05	0.0520764	0.000169883	8.74557e-05	0.0520764	0.545386
cg00744866	6	0.000654743	0.00538728	0.903267	0.000654743	0.00538728	0.903267	0.460791	0.000541239	9.46678e-05	1.08267e-08	0.000541239	9.46678e-05	1.08267e-08	0.861537	-0.000293132	0.000116076	0.0115588	-0.000265752	0.000137051	0.0524926	0.278274
cg07296597	6	0.000819456	0.00457753	0.857924	0.00110143	0.00519272	0.832021	0.298924	-0.000285531	8.1841e-05	0.000485093	-0.000272703	0.000108019	0.0115836	0.189716	0.000191954	9.91932e-05	0.0529713	0.000191954	9.91932e-05	0.0529713	0.46232
cg02003612	6	-0.000420639	0.00415136	0.919292	-0.000420639	0.00415136	0.919292	0.74078	-0.00035258	7.29304e-05	1.335e-06	-0.000346928	8.1507e-05	2.07724e-05	0.333419	0.00017216	8.9537e-05	0.0545078	0.00017216	8.9537e-05	0.0545078	0.771258
cg22724228	6	7.79222e-05	0.00433383	0.985655	7.79222e-05	0.00433383	0.985655	0.960225	-0.00028584	7.51356e-05	0.000142192	-0.00028584	7.51356e-05	0.000142192	0.895322	0.00017766	9.27905e-05	0.0555387	0.00017766	9.27905e-05	0.0555387	0.915381
cg13052638	6	-0.00121639	0.00793936	0.878232	-0.00141227	0.00860216	0.869592	0.342619	-2.46717e-05	0.000142424	0.862473	2.01229e-05	0.000232689	0.931085	0.0603576	0.000326713	0.000171398	0.0566287	0.000326713	0.000171398	0.0566287	0.457787
cg14988083	6	0.0213717	0.00533249	6.12792e-05	0.0213717	0.00533249	6.12792e-05	0.545221	0.000112318	9.34436e-05	0.229368	0.000110651	0.000115514	0.338111	0.25721	-0.000225992	0.000114252	0.0479264	-0.000255566	0.000134373	0.0571829	0.281899
cg04598420	6	0.000218356	0.00186239	0.906666	0.000218356	0.00186239	0.906666	0.733814	7.9656e-05	3.18536e-05	0.0123952	7.9656e-05	3.18536e-05	0.0123952	0.880758	-7.491e-05	3.94655e-05	0.0576812	-7.491e-05	3.94655e-05	0.0576812	0.660235
cg02092181	6	-0.0036655	0.00632707	0.562362	-0.00213199	0.00826828	0.796522	0.167757	5.75494e-05	0.000114449	0.615078	-2.27817e-05	0.000199838	0.909237	0.0330674	0.000357607	0.000137438	0.00926963	0.000320729	0.000169213	0.0580372	0.224128
cg07068980	5	-0.000175517	0.00398856	0.9649	-0.000175517	0.00398856	0.9649	0.92076	-0.00053722	7.08346e-05	3.34662e-14	-0.00053722	7.08346e-05	3.34662e-14	0.699021	0.000164768	8.72651e-05	0.0590084	0.000164768	8.72651e-05	0.0590084	0.922004
cg20359565	6	-0.00223824	0.0037599	0.551648	-0.00215918	0.00406306	0.59513	0.352457	-0.000179002	6.5437e-05	0.00622871	-0.000212912	0.000107764	0.0481863	0.0640824	0.00021543	8.03772e-05	0.00735692	0.000201834	0.000107021	0.0593046	0.17971
cg07129392	6	0.000842784	0.00521139	0.871527	0.000842784	0.00521139	0.871527	0.987152	-0.000165903	9.17836e-05	0.0706782	-0.000165903	9.17836e-05	0.0706782	0.48849	0.000211532	0.000112289	0.0595898	0.000211532	0.000112289	0.0595898	0.992145
cg21991633	6	-0.00187796	0.00412492	0.648913	-0.00187796	0.00412492	0.648913	0.512397	-0.000571928	7.2526e-05	3.12438e-15	-0.000571928	7.2526e-05	3.12438e-15	0.996236	0.000196486	8.90714e-05	0.0273884	0.000182746	9.74915e-05	0.0608637	0.342132
cg02004370	6	-0.00299904	0.00473003	0.526053	-0.00299904	0.00473003	0.526053	0.449578	-5.72042e-05	8.28948e-05	0.490143	-9.1919e-05	0.00011989	0.443265	0.135311	0.00021198	0.000102118	0.0379103	0.000212418	0.00011349	0.0612485	0.328011
cg07965335	6	-0.000936612	0.00359136	0.79425	-0.000936612	0.00359136	0.79425	0.421347	-0.00040608	6.31557e-05	1.27758e-10	-0.00040608	6.31557e-05	1.27758e-10	0.615263	0.000144658	7.73109e-05	0.0613289	0.000144658	7.73109e-05	0.0613289	0.489349
cg26222731	6	-0.000826992	0.00336012	0.80559	-0.000826992	0.00336012	0.80559	0.99512	-0.000257258	5.8309e-05	1.02432e-05	-0.000229197	7.82145e-05	0.00338569	0.187554	0.000133214	7.15369e-05	0.062578	0.000133214	7.15369e-05	0.062578	0.94874
cg20666307	6	-0.00123163	0.00515383	0.811126	-0.00123163	0.00515383	0.811126	0.962621	-0.000623052	9.02783e-05	5.14732e-12	-0.000636663	0.000141995	7.33616e-06	0.0802625	0.000206005	0.000110924	0.0632871	0.000206005	0.000110924	0.0632871	0.983348
cg03508235	6	-0.00301278	0.0039331	0.443672	-0.00279948	0.0045685	0.540023	0.28313	-0.000246746	6.9392e-05	0.000376787	-0.000243307	9.04552e-05	0.00714943	0.210564	0.000225145	8.45891e-05	0.00777636	0.000212321	0.000114617	0.0639618	0.155523
cg19730814	6	-0.000948204	0.00457705	0.835881	-0.000948204	0.00457705	0.835881	0.614896	-0.000395371	8.04085e-05	8.78694e-07	-0.000395371	8.04085e-05	8.78694e-07	0.525682	0.000181885	9.82757e-05	0.0642031	0.000181885	9.82757e-05	0.0642031	0.474112
cg10469791	6	-0.000337806	0.00450887	0.940278	-0.000337806	0.00450887	0.940278	0.910274	-0.000389147	8.02745e-05	1.24897e-06	-0.000389147	8.02745e-05	1.24897e-06	0.909694	0.000180438	9.76189e-05	0.0645457	0.000180438	9.76189e-05	0.0645457	0.90518
cg19706534	6	-0.000338964	0.00440275	0.938632	-0.000338964	0.00440275	0.938632	0.574458	-0.000298139	7.64687e-05	9.66587e-05	-0.000284688	8.72009e-05	0.00109565	0.320416	0.000202332	9.39668e-05	0.031301	0.000192908	0.000104709	0.0654286	0.330504
cg12769732	6	-4.58445e-05	0.00372623	0.990184	-4.58445e-05	0.00372623	0.990184	0.683153	-0.000215787	6.50632e-05	0.000911284	-0.000214812	6.76928e-05	0.00150695	0.388722	0.000146179	7.95476e-05	0.0661166	0.000146179	7.95476e-05	0.0661166	0.480627
cg18148375	6	-0.000509334	0.00348066	0.883659	-0.000426916	0.00372189	0.90868	0.360837	-0.00036922	6.10883e-05	1.50295e-09	-0.000368772	7.39383e-05	6.11447e-07	0.277803	0.000156665	7.45702e-05	0.0356486	0.00015347	8.37391e-05	0.0668444	0.323898
cg13655385	6	-0.00174327	0.00395436	0.659324	-0.00164927	0.00408792	0.686617	0.389658	-0.000152394	6.98092e-05	0.029035	-0.000164759	9.80785e-05	0.0929825	0.172022	0.000184029	8.54941e-05	0.0313549	0.000175778	9.62767e-05	0.0678868	0.325749
cg14301348	5	0.00140615	0.00403745	0.727632	0.00140615	0.00403745	0.727632	0.658301	-0.000383928	7.21871e-05	1.04619e-07	-0.000411069	0.000104445	8.29369e-05	0.132382	0.000160249	8.77951e-05	0.0679622	0.000160249	8.77951e-05	0.0679622	0.701641
cg15839913	6	-0.000444582	0.00364228	0.90285	-0.000444582	0.00364228	0.90285	0.603194	-0.00026234	6.24285e-05	2.64275e-05	-0.00028149	7.64957e-05	0.000233401	0.263262	0.000141552	7.77644e-05	0.0687193	0.000141552	7.77644e-05	0.0687193	0.558668
cg01576260	6	0.000891711	0.00377827	0.813425	0.000891711	0.00377827	0.813425	0.887893	-0.000403877	6.63402e-05	1.14354e-09	-0.000403877	6.63402e-05	1.14354e-09	0.548368	0.00014767	8.11888e-05	0.0689354	0.00014767	8.11888e-05	0.0689354	0.788737
cg25372290	6	-0.00164442	0.00581803	0.777451	-0.00159304	0.00636409	0.802342	0.339937	-0.000326668	0.000102821	0.00148784	-0.000326668	0.000102821	0.00148784	0.491167	0.000268286	0.000126248	0.03358	0.0002689	0.000148478	0.0701346	0.281689
cg04731624	6	0.0153091	0.0040862	0.000179286	0.0152801	0.00546164	0.00514667	0.169341	-0.000384118	7.1403e-05	7.46637e-08	-0.000384118	7.1403e-05	7.46637e-08	0.742434	-0.000190031	8.70758e-05	0.0290826	-0.000194868	0.000107709	0.0704181	0.239368
cg05133814	6	-0.000309051	0.00370797	0.933575	-0.000309051	0.00370797	0.933575	0.564029	-0.000219086	6.50944e-05	0.000763604	-0.000219086	6.50944e-05	0.000763604	0.582531	0.000148984	7.98249e-05	0.0619878	0.000148493	8.23496e-05	0.071356	0.389938
cg08904151	6	0.000603022	0.00327643	0.853975	0.000603022	0.00327643	0.853975	0.724386	-0.000275214	5.77159e-05	1.85673e-06	-0.000275214	5.77159e-05	1.85673e-06	0.923534	0.000126481	7.06539e-05	0.0734305	0.000126481	7.06539e-05	0.0734305	0.837055
cg06090362	6	-0.000223259	0.00379678	0.95311	-0.000223259	0.00379678	0.95311	0.917795	-0.000277829	6.61495e-05	2.66896e-05	-0.000277829	6.61495e-05	2.66896e-05	0.87768	0.000142915	8.1071e-05	0.0779276	0.000142915	8.1071e-05	0.0779276	0.875821
cg14594187	6	0.000497718	0.00488762	0.91889	0.00117991	0.0059988	0.844069	0.227039	0.000682229	8.83341e-05	1.1337e-14	0.000758219	0.000168198	6.54745e-06	0.0158604	-0.000237931	0.000105442	0.0240383	-0.000279478	0.000159331	0.0794175	0.0748956
cg22954687	6	-0.0130019	0.00363171	0.000343473	-0.01413	0.00503221	0.00498657	0.138926	-0.000144608	6.37693e-05	0.0233485	-0.000170808	0.000123175	0.165532	0.0152156	0.000159919	7.76739e-05	0.0395085	0.000199388	0.000113679	0.0794363	0.107707
cg14055212	6	-0.000498246	0.00488978	0.91884	-0.000498246	0.00488978	0.91884	0.986084	-7.27839e-05	8.68407e-05	0.401957	-7.27839e-05	8.68407e-05	0.401957	0.987594	0.000185316	0.000106051	0.0805633	0.000185316	0.000106051	0.0805633	0.98555
cg19192065	6	-0.000932459	0.00470309	0.842838	-0.000932459	0.00470309	0.842838	0.82266	-0.000100852	8.28031e-05	0.223235	-0.000100071	0.000127405	0.432184	0.0882984	0.000177931	0.000101955	0.0809505	0.000177931	0.000101955	0.0809505	0.719361
cg04204669	6	0.0155482	0.0039587	8.5797e-05	0.0175478	0.00539693	0.00114823	0.145431	-0.000784118	7.00829e-05	4.64516e-29	-0.000744614	0.000115625	1.19538e-10	0.0580569	-0.000153984	8.48314e-05	0.0694962	-0.000236612	0.000135889	0.0816459	0.0511709
cg15805104	6	0.0012137	0.00456114	0.790166	0.00159116	0.00568356	0.77951	0.233456	0.000663456	8.15092e-05	3.9646e-16	0.000663456	8.15092e-05	3.9646e-16	0.589337	-0.000201572	9.92536e-05	0.0422674	-0.000213559	0.000122718	0.0818175	0.246847
cg15611112	6	-0.000362793	0.0034011	0.915051	-0.000327497	0.00358834	0.927281	0.370089	-0.000247071	6.00206e-05	3.84769e-05	-0.000246817	8.44027e-05	0.00345253	0.154803	0.000127212	7.31011e-05	0.0818213	0.000127212	7.31011e-05	0.0818213	0.437928
cg16058765	6	0.000601177	0.00300179	0.841267	0.000601177	0.00300179	0.841267	0.510194	-0.00038168	5.21784e-05	2.57564e-13	-0.000380321	5.34582e-05	1.12443e-12	0.399889	0.000111283	6.4012e-05	0.0821269	0.000111283	6.4012e-05	0.0821269	0.428328
cg21755755	6	0.000679674	0.00389647	0.861525	0.000679674	0.00389647	0.861525	0.850185	-0.000392688	6.92029e-05	1.39137e-08	-0.000392688	6.92029e-05	1.39137e-08	0.831484	0.000145502	8.39682e-05	0.0831283	0.000145502	8.39682e-05	0.0831283	0.878249
cg23363039	6	0.00019614	0.00442892	0.964676	0.000262651	0.00450707	0.953529	0.402616	-0.000170785	7.65773e-05	0.0257323	-0.00017075	0.000104385	0.101889	0.183308	0.000190015	9.49413e-05	0.0453502	0.000180058	0.000103935	0.0832004	0.348299
cg21886186	6	-0.000208259	0.00448137	0.962934	-0.000208259	0.00448137	0.962934	0.423864	-0.000774285	7.83302e-05	4.84139e-23	-0.000786679	0.000109266	6.03723e-13	0.169514	0.00016636	9.60468e-05	0.0832608	0.00016636	9.60468e-05	0.0832608	0.48
cg06180389	6	0.0220458	0.00496102	8.83805e-06	0.0224828	0.00590223	0.000139413	0.275227	0.000277193	8.60975e-05	0.00128405	0.000277193	8.60975e-05	0.00128405	0.835449	-0.000204711	0.000105739	0.0528663	-0.000223206	0.000128942	0.0834402	0.261408
cg26361041	6	7.15081e-05	0.00474689	0.987981	-0.000754992	0.00580547	0.896528	0.239707	-0.000323871	8.37503e-05	0.000110135	-0.000341057	0.000111253	0.00217237	0.190748	0.000178317	0.000102464	0.0818078	0.000179623	0.000104111	0.0844727	0.403205
cg16328023	5	-1.78369e-05	0.0052171	0.997272	-1.78369e-05	0.0052171	0.997272	0.942108	-0.000456703	9.19523e-05	6.80907e-07	-0.000456703	9.19523e-05	6.80907e-07	0.834466	0.000195038	0.000113143	0.0847414	0.000195038	0.000113143	0.0847414	0.832306
cg11472725	6	0.00079062	0.00406661	0.845849	0.00079062	0.00406661	0.845849	0.56336	-0.000362618	7.11394e-05	3.4455e-07	-0.000362618	7.11394e-05	3.4455e-07	0.536952	0.00014961	8.73002e-05	0.0865771	0.00014961	8.73002e-05	0.0865771	0.456922
cg11886884	6	0.00269161	0.00403728	0.50497	0.00269161	0.00403728	0.50497	0.822871	-0.000376233	7.07742e-05	1.06095e-07	-0.000381702	8.3688e-05	5.09085e-06	0.288634	0.000148019	8.65577e-05	0.0872549	0.000148019	8.65577e-05	0.0872549	0.792513
cg14790000	5	0.00223495	0.00473361	0.636823	0.00195741	0.00562638	0.727917	0.246098	-0.000787613	8.53023e-05	2.62671e-20	-0.000854212	0.000163288	1.68308e-07	0.0179307	0.000214941	0.000103619	0.038048	0.000220098	0.000129177	0.0884095	0.215457
cg08685909	6	0.0137915	0.00302436	5.11227e-06	0.0130825	0.00458263	0.00430641	0.0873831	-0.000377944	5.29238e-05	9.24605e-13	-0.000377944	5.29238e-05	9.24605e-13	0.425538	-0.00017619	6.50037e-05	0.00671909	-0.000162532	9.54799e-05	0.0887058	0.108313
cg08264895	5	0.0184288	0.00395152	3.10548e-06	0.0184288	0.00395152	3.10548e-06	0.438436	-0.000185361	6.91469e-05	0.00734709	-0.000185361	6.91469e-05	0.00734709	0.943784	-0.000155688	8.53823e-05	0.0682399	-0.000161052	9.50466e-05	0.0901783	0.322141
cg05877109	6	0.00212579	0.00359725	0.554554	0.00212579	0.00359725	0.554554	0.424175	0.000275804	6.31533e-05	1.25838e-05	0.000275804	6.31533e-05	1.25838e-05	0.518924	-0.000166445	7.65487e-05	0.0296777	-0.000151138	8.93702e-05	0.0908097	0.299104
cg16112945	6	0.00146045	0.0036463	0.688767	0.00146045	0.0036463	0.688767	0.825903	-0.00023996	6.38353e-05	0.000170562	-0.00023996	6.38353e-05	0.000170562	0.625258	0.000132212	7.84337e-05	0.0918619	0.000132212	7.84337e-05	0.0918619	0.932516
cg27303933	6	-4.44346e-05	0.00322231	0.988998	-4.44346e-05	0.00322231	0.988998	0.588676	-5.28407e-05	5.61972e-05	0.347077	-5.28407e-05	5.61972e-05	0.347077	0.577398	0.000115742	6.86856e-05	0.0919696	0.000115742	6.86856e-05	0.0919696	0.657028
cg12300018	6	0.00208098	0.00429437	0.627972	0.00208098	0.00429437	0.627972	0.604925	-0.000226416	7.45008e-05	0.00237284	-0.000226477	9.3321e-05	0.01523	0.241776	0.000153927	9.14001e-05	0.0921629	0.000153927	9.14001e-05	0.0921629	0.847079
cg23238677	6	0.00077873	0.00526692	0.882459	0.00077873	0.00526692	0.882459	0.562802	-0.000340476	9.32576e-05	0.000261297	-0.00037968	0.000127224	0.00284187	0.171744	0.00019022	0.000113438	0.0935707	0.00019022	0.000113438	0.0935707	0.696821
cg07163480	5	0.0024622	0.00388716	0.526462	0.0024622	0.00388716	0.526462	0.886483	-0.000382623	6.86779e-05	2.52898e-08	-0.000382623	6.86779e-05	2.52898e-08	0.747894	0.000139873	8.40731e-05	0.0961703	0.000139873	8.40731e-05	0.0961703	0.886177
cg20186588	6	-0.000518687	0.0038445	0.892678	-0.000642352	0.00418783	0.878094	0.341673	-0.000662593	6.75802e-05	1.07626e-22	-0.000678808	0.000122426	2.94592e-08	0.0261798	0.00016393	8.25374e-05	0.0470192	0.000162711	9.80758e-05	0.0971081	0.267368
cg05307477	6	0.00061334	0.00373214	0.869463	0.000480094	0.00462527	0.91733	0.21933	-0.000437113	6.63096e-05	4.33964e-11	-0.000437113	6.63096e-05	4.33964e-11	0.591064	0.000159352	8.04638e-05	0.047656	0.000163855	9.90485e-05	0.098068	0.233223
cg00631221	6	-0.000345223	0.00267114	0.897166	1.5522e-05	0.00319143	0.996119	0.2679	-6.78072e-06	4.65734e-05	0.884243	-6.78072e-06	4.65734e-05	0.884243	0.642322	-0.000109111	5.72172e-05	0.0565263	-0.000123662	7.49491e-05	0.0989537	0.200648
cg14731422	6	0.00163037	0.00565864	0.773255	-5.5423e-05	0.00778681	0.994321	0.138909	-0.000248663	0.000100874	0.013698	-0.000246346	0.000111739	0.0274788	0.339858	0.000208623	0.000122681	0.0890296	0.000216224	0.000131368	0.0997763	0.359723
cg25403895	6	0.000384551	0.00464747	0.934055	0.000384551	0.00464747	0.934055	0.801332	-0.000472865	8.1414e-05	6.31652e-09	-0.000452462	0.000118533	0.000134991	0.137482	0.000164018	9.96611e-05	0.0998127	0.000164018	9.96611e-05	0.0998127	0.816551
cg26977759	6	0.0006259	0.00358248	0.861307	0.0006259	0.00358248	0.861307	0.984085	-0.000409536	6.31435e-05	8.82626e-11	-0.000406809	7.70403e-05	1.28852e-07	0.256225	0.000126731	7.72046e-05	0.100695	0.000126731	7.72046e-05	0.100695	0.957196
cg04031656	6	0.0108912	0.00344903	0.00158988	0.0108912	0.00344903	0.00158988	0.484407	9.64003e-05	6.02857e-05	0.109808	9.64003e-05	6.02857e-05	0.109808	0.487964	-0.000120947	7.3749e-05	0.101008	-0.000120947	7.3749e-05	0.101008	0.579652
cg10118167	6	-0.000940333	0.00342028	0.783371	-0.0011163	0.00469136	0.811921	0.160591	-3.57679e-05	6.01837e-05	0.552303	-3.64302e-05	0.000118833	0.759174	0.0164122	0.000161981	7.34674e-05	0.0274679	0.000152157	9.29757e-05	0.101729	0.232438
cg08815340	6	0.00265279	0.00407715	0.515273	0.000949339	0.00635246	0.881203	0.0736402	0.000646451	7.14431e-05	1.44992e-19	0.000620326	0.000130337	1.94157e-06	0.0320056	-0.000274995	8.74133e-05	0.00165569	-0.000225799	0.000138073	0.101973	0.0749615
cg19820287	6	0.00102885	0.00425036	0.808731	0.00102885	0.00425036	0.808731	0.458194	-0.000423023	7.40492e-05	1.11179e-08	-0.000423023	7.40492e-05	1.11179e-08	0.67262	0.000148929	9.08378e-05	0.101108	0.000148698	9.1053e-05	0.102451	0.413982
cg13616508	6	0.00231839	0.00408494	0.570343	0.00170481	0.00550554	0.756825	0.167773	0.000441278	7.07552e-05	4.46944e-10	0.000441278	7.07552e-05	4.46944e-10	0.699678	-0.000200731	8.68324e-05	0.0207942	-0.000190943	0.000117405	0.103874	0.171638
cg05709770	6	-0.00350929	0.0043991	0.425027	-0.00112861	0.00588782	0.847988	0.161583	-0.000212436	7.72526e-05	0.00596164	-0.000212697	8.87111e-05	0.0165012	0.314263	0.000321002	9.40239e-05	0.000640062	0.000235996	0.000145318	0.104376	0.0700545
cg20348189	6	0.000846762	0.00431343	0.844369	0.000846762	0.00431343	0.844369	0.692599	-0.00019085	7.53713e-05	0.0113374	-0.00019085	7.53713e-05	0.0113374	0.673707	0.000149599	9.23717e-05	0.105334	0.000149599	9.23717e-05	0.105334	0.857117
cg17501210	6	-0.00227545	0.00697425	0.744224	-0.00206325	0.00757742	0.785399	0.348461	-0.00140268	0.000123941	1.07801e-29	-0.00139152	0.000134736	5.27661e-25	0.358659	-0.000244571	0.000150617	0.104419	-0.000245026	0.000152342	0.107751	0.407126
cg24384437	6	-0.000944587	0.00388883	0.808085	-0.000944587	0.00388883	0.808085	0.421674	-0.000484436	6.78201e-05	9.13426e-13	-0.000471449	0.000132348	0.00036776	0.0130726	0.000207244	8.32378e-05	0.0127823	0.000180654	0.000112485	0.108268	0.163529
cg04275692	6	0.00367972	0.00492569	0.455035	0.00367972	0.00492569	0.455035	0.55954	-0.000418915	8.56459e-05	1.002e-06	-0.000418915	8.56459e-05	1.002e-06	0.51951	0.000169362	0.000105618	0.108818	0.000169362	0.000105618	0.108818	0.509707
cg04335714	6	0.00520328	0.00432776	0.229247	0.00494221	0.00580063	0.394207	0.167325	0.000229451	7.51753e-05	0.00227159	0.000191613	0.0001288	0.136836	0.0452361	-0.000272399	9.23802e-05	0.00319144	-0.000250158	0.000156194	0.109248	0.0370203
cg18356190	6	-0.0133547	0.00414465	0.00127233	-0.0133547	0.00414465	0.00127233	0.918806	-0.000304582	7.21324e-05	2.41559e-05	-0.000304582	7.21324e-05	2.41559e-05	0.647883	0.000141143	8.8511e-05	0.110793	0.000141143	8.8511e-05	0.110793	0.942139
cg00012576	6	0.00287565	0.0043469	0.508266	0.00287565	0.0043469	0.508266	0.851426	-0.000445343	7.5493e-05	3.65421e-09	-0.000444794	7.93299e-05	2.05991e-08	0.381493	0.00014851	9.31504e-05	0.110868	0.00014851	9.31504e-05	0.110868	0.59786
cg02491878	6	0.0196833	0.00599559	0.00102719	0.0196833	0.00599559	0.00102719	0.560727	0.000381174	0.000105891	0.000318596	0.000381174	0.000105891	0.000318596	0.737241	-0.000205837	0.000129717	0.112554	-0.000205837	0.000129717	0.112554	0.552496
cg04735129	6	-0.000603947	0.00364914	0.868547	-0.000603947	0.00364914	0.868547	0.83047	0.000363188	6.31596e-05	8.90766e-09	0.000363188	6.31596e-05	8.90766e-09	0.856362	-0.000122935	7.75932e-05	0.113114	-0.000122935	7.75932e-05	0.113114	0.680975
cg05775492	6	0.000508914	0.00384623	0.894735	0.000508914	0.00384623	0.894735	0.650187	-0.000380813	6.73495e-05	1.56494e-08	-0.000380813	6.73495e-05	1.56494e-08	0.700001	0.000130969	8.26759e-05	0.113165	0.000130969	8.26759e-05	0.113165	0.71434
cg00608540	6	0.014999	0.00431942	0.000515738	0.014999	0.00431942	0.000515738	0.865162	0.000220598	7.52123e-05	0.00335705	0.000220598	7.52123e-05	0.00335705	0.948212	-0.000145686	9.20184e-05	0.11337	-0.000145686	9.20184e-05	0.11337	0.951776
cg25488990	6	-0.00260977	0.00437495	0.550823	-0.00188933	0.00732107	0.796355	0.036286	-0.000529705	7.74354e-05	7.88577e-12	-0.000548331	0.000193369	0.00457301	0.00025063	0.000291265	9.46618e-05	0.00209169	0.000251917	0.000159661	0.114605	0.0356944
cg13443950	6	-0.00135463	0.00437724	0.756964	-0.0031745	0.00735289	0.665934	0.0416367	-0.000371103	7.72524e-05	1.55704e-06	-0.0003756	8.78313e-05	1.89955e-05	0.329137	0.0002089	9.43469e-05	0.0268175	0.000235131	0.000149064	0.114706	0.0762378
cg19309616	6	0.00176858	0.00556865	0.750791	0.00117385	0.00649034	0.856477	0.285407	-0.000285312	9.78003e-05	0.00353091	-0.000309636	0.000132485	0.0194319	0.186552	0.000200261	0.0001198	0.0945969	0.000212986	0.000135569	0.11617	0.316334
cg17569842	6	-0.000151351	0.00700298	0.982757	-0.000151351	0.00700298	0.982757	0.590783	-0.000781988	0.000123285	2.25426e-10	-0.000781988	0.000123285	2.25426e-10	0.511861	-0.000236272	0.0001507	0.116922	-0.000236272	0.0001507	0.116922	0.483218
cg11181726	6	-0.000354633	0.00404108	0.93007	-0.00354837	0.00660489	0.591106	0.046184	-0.00040569	7.13642e-05	1.30982e-08	-0.000462517	0.000198046	0.0195226	1.30237e-05	0.000170334	8.70018e-05	0.0502517	0.000236519	0.000150908	0.117042	0.0274682
cg25349472	6	0.00182341	0.00551492	0.740923	0.00220813	0.00655441	0.736198	0.260967	1.64254e-05	9.88534e-05	0.868032	1.64254e-05	9.88534e-05	0.868032	0.54685	0.000200748	0.000119688	0.0934915	0.000200831	0.000128351	0.117652	0.35605
cg27050031	6	-0.000994094	0.00420778	0.813237	-0.000855721	0.00458325	0.851891	0.343395	-0.000263591	7.36399e-05	0.000344312	-0.000263591	7.36399e-05	0.000344312	0.614804	0.000173108	9.00653e-05	0.054603	0.000167437	0.000107032	0.117732	0.271425
cg14051336	6	-0.00425995	0.00327924	0.193921	-0.00269371	0.00460929	0.558946	0.130392	-0.00039303	5.74034e-05	7.55177e-12	-0.000395339	6.23815e-05	2.33616e-10	0.359057	0.000211778	7.01234e-05	0.00252717	0.0001669	0.000106728	0.117867	0.084929
cg17485530	6	-0.00153894	0.00477138	0.747047	-0.00266515	0.00797183	0.738137	0.0375112	-0.00032976	8.27075e-05	6.68961e-05	-0.000434519	0.000182581	0.0173186	0.0019935	0.000243248	0.000101625	0.0166845	0.000279108	0.000178802	0.118525	0.0238087
cg02194046	6	-0.00189139	0.00372324	0.611456	-0.00257313	0.0052433	0.623606	0.147304	-0.000296901	6.48779e-05	4.73262e-06	-0.000296901	6.48779e-05	4.73262e-06	0.644618	0.000182676	7.9309e-05	0.0212597	0.000188075	0.000121045	0.120241	0.0941877
cg06911110	5	-0.00306732	0.00580879	0.597466	-0.00244262	0.00805477	0.761699	0.142622	-0.00210817	0.00010129	3.28841e-96	-0.00204479	0.000164502	1.79281e-35	0.0731999	-0.000228078	0.000125165	0.0684215	-0.000240999	0.000156049	0.122497	0.23076
cg06640997	6	0.0160858	0.00489862	0.0010244	0.0160858	0.00489862	0.0010244	0.583006	2.44358e-05	8.59691e-05	0.776227	-2.47211e-05	0.000141368	0.861181	0.0677938	-0.000162657	0.000105607	0.12351	-0.000162754	0.000105903	0.124337	0.413845
cg19297427	5	0.00316541	0.00383877	0.409604	0.00316541	0.00383877	0.409604	0.897609	-0.000833887	6.636e-05	3.24267e-36	-0.000841775	9.20936e-05	6.22014e-20	0.171269	0.000126685	8.24537e-05	0.12443	0.000126685	8.24537e-05	0.12443	0.882781
cg14630032	6	0.0121151	0.00366413	0.000945035	0.0121151	0.00366413	0.000945035	0.917678	0.000295562	6.33472e-05	3.07506e-06	0.000295815	6.37379e-05	3.46547e-06	0.411774	-0.000120343	7.83609e-05	0.124598	-0.000120343	7.83609e-05	0.124598	0.670064
cg00063748	6	-0.000370488	0.00366986	0.919587	-8.69872e-05	0.00390385	0.982223	0.368757	-0.000490714	6.36386e-05	1.24885e-14	-0.000490714	6.36386e-05	1.24885e-14	0.81474	0.000197513	7.86187e-05	0.0119952	0.000164743	0.000107399	0.125045	0.17252
cg20566484	5	0.00174167	0.00401429	0.664385	0.00174167	0.00401429	0.664385	0.485664	-0.000226739	7.08613e-05	0.00137543	-0.000226739	7.08613e-05	0.00137543	0.648021	0.000134021	8.74453e-05	0.125368	0.000134021	8.74453e-05	0.125368	0.665274
cg14016236	6	-0.00114148	0.00571817	0.841775	-0.00114148	0.00571817	0.841775	0.715179	-4.91984e-05	9.93179e-05	0.620344	-5.93726e-05	0.000113696	0.601528	0.320891	-0.000186223	0.000121512	0.125387	-0.000186223	0.000121512	0.125387	0.513323
cg17898124	6	-0.000387347	0.0049352	0.937441	-0.000666426	0.00657431	0.919258	0.1711	-0.000300102	8.6871e-05	0.000551178	-0.000317148	0.000135104	0.0189027	0.0927099	0.00022019	0.000106587	0.0388447	0.000216361	0.000141286	0.125679	0.182396
cg19433118	6	0.000944021	0.00407842	0.816952	0.000944021	0.00407842	0.816952	0.502803	-0.000451979	7.07904e-05	1.71671e-10	-0.000451979	7.07904e-05	1.71671e-10	0.815257	0.000134715	8.81476e-05	0.12644	0.000134715	8.81476e-05	0.12644	0.653978
cg16733267	6	-0.0077701	0.00474192	0.101297	-0.00444658	0.00687754	0.517932	0.114853	-0.000196576	8.32076e-05	0.0181533	-0.000154733	0.000119419	0.195074	0.143999	0.000337223	0.000102228	0.000971168	0.000239365	0.000157117	0.127638	0.0822271
cg18984200	6	-0.000105847	0.00342023	0.975312	-0.000252503	0.00362243	0.944428	0.371092	-0.000167284	5.99913e-05	0.00529578	-0.000206212	9.94573e-05	0.0381379	0.0700881	0.000125082	7.25759e-05	0.084804	0.000136254	8.9568e-05	0.1282	0.246501
cg13358873	6	-0.00299401	0.00491636	0.542532	-0.00285091	0.00794169	0.71961	0.060358	-0.000303538	8.50332e-05	0.000357479	-0.000427036	0.000184953	0.0209497	0.00388345	0.000280813	0.000105079	0.00753109	0.000273284	0.000180509	0.130036	0.0378415
cg19805668	6	0.0158679	0.00494926	0.00134543	0.0158679	0.00494926	0.00134543	0.480326	-9.89512e-06	8.73663e-05	0.909824	1.28606e-06	0.000114437	0.991033	0.208685	-0.000162553	0.000107388	0.130101	-0.000162553	0.000107388	0.130101	0.449965
cg10317175	6	0.0151051	0.00422351	0.000348308	0.0158021	0.0060012	0.00845947	0.131567	0.0001061	7.47367e-05	0.155711	0.000103346	7.72893e-05	0.181178	0.395876	-0.000175391	9.06477e-05	0.0530067	-0.000192749	0.000127657	0.13107	0.14777
cg16120196	6	0.00200981	0.00377097	0.594054	0.00200981	0.00377097	0.594054	0.643068	-0.000504815	6.59937e-05	2.01844e-14	-0.000504815	6.59937e-05	2.01844e-14	0.832846	0.00012184	8.07853e-05	0.131504	0.00012184	8.07853e-05	0.131504	0.513058
cg19642168	5	0.00286508	0.00497161	0.56442	0.00286508	0.00497161	0.56442	0.407864	-0.000280658	8.56808e-05	0.00105431	-0.000280658	8.56808e-05	0.00105431	0.659231	0.000160931	0.000107258	0.133507	0.000160931	0.000107258	0.133507	0.471068
cg12409547	6	0.000939985	0.00337833	0.780829	0.0012947	0.0038017	0.733438	0.319507	-0.000180297	5.85122e-05	0.00206064	-0.00013511	9.99663e-05	0.176516	0.0491264	0.000133977	7.23244e-05	0.0639614	0.000123921	8.30254e-05	0.13555	0.306988
cg00153693	6	0.00125614	0.0066789	0.850817	-0.00129042	0.00939027	0.890698	0.127555	-0.000121534	0.000118013	0.303084	-0.000103611	0.00015991	0.517025	0.18245	0.000233395	0.000144052	0.105188	0.00027284	0.000183453	0.136949	0.210683
cg03609427	6	0.00249694	0.00393855	0.526099	0.00249694	0.00393855	0.526099	0.533264	-0.000267955	6.93541e-05	0.00011174	-0.000267955	6.93541e-05	0.00011174	0.701296	0.000125408	8.44255e-05	0.137431	0.000125408	8.44255e-05	0.137431	0.581849
cg03942932	6	-0.00187499	0.00559566	0.737565	-0.00187499	0.00559566	0.737565	0.57971	0.000789191	9.84529e-05	1.09311e-15	0.000789191	9.84529e-05	1.09311e-15	0.714722	-0.000177398	0.000120142	0.139793	-0.000177398	0.000120142	0.139793	0.55032
cg15507486	6	0.00055978	0.00441937	0.899206	0.00055978	0.00441937	0.899206	0.766372	-0.000516721	7.67493e-05	1.66677e-11	-0.000516721	7.67493e-05	1.66677e-11	0.484739	0.000139708	9.46638e-05	0.139988	0.000139708	9.46638e-05	0.139988	0.782733
cg24520479	6	-0.00120542	0.0041838	0.773257	-0.00120542	0.0041838	0.773257	0.420295	-0.00035837	7.30168e-05	9.19867e-07	-0.00035837	7.30168e-05	9.19867e-07	0.796045	0.000168637	8.91697e-05	0.0585992	0.000151294	0.000102703	0.140719	0.296213
cg20927649	6	0.00374525	0.00395657	0.343848	0.00374525	0.00395657	0.343848	0.494093	-0.000166153	6.93127e-05	0.0165231	-0.000166153	6.93127e-05	0.0165231	0.703324	0.00012522	8.50323e-05	0.140853	0.00012522	8.50323e-05	0.140853	0.459877
cg13344886	5	0.00214734	0.00383348	0.575374	0.00193728	0.00413787	0.639653	0.343732	-0.000273221	6.69489e-05	4.48349e-05	-0.000273221	6.69489e-05	4.48349e-05	0.507823	0.000127137	8.29503e-05	0.125353	0.000135544	9.21894e-05	0.141486	0.325908
cg10051588	6	0.000704412	0.00358557	0.844252	0.000704412	0.00358557	0.844252	0.923458	-0.000347977	6.34435e-05	4.13842e-08	-0.000347977	6.34435e-05	4.13842e-08	0.783489	0.000113366	7.71119e-05	0.141522	0.000113366	7.71119e-05	0.141522	0.901349
cg13656408	5	-0.000145478	0.00484233	0.976033	-0.000164083	0.00530696	0.975335	0.324096	-0.000519078	8.58587e-05	1.48739e-09	-0.000519078	8.58587e-05	1.48739e-09	0.506915	0.000198626	0.000105688	0.0601934	0.000201886	0.000137487	0.141996	0.18672
cg19848140	6	0.0166638	0.00402922	3.53805e-05	0.0166638	0.00402922	3.53805e-05	0.430848	-7.83635e-05	7.16962e-05	0.274397	-9.076e-05	9.54769e-05	0.34181	0.191445	-0.000143945	8.69508e-05	0.0978288	-0.000145086	9.91252e-05	0.143285	0.302083
cg24605325	6	0.0180346	0.00488581	0.000223174	0.0174795	0.0055212	0.00154613	0.314681	-0.000540726	8.52916e-05	2.30161e-10	-0.000540726	8.52916e-05	2.30161e-10	0.575403	-0.000230579	0.000104813	0.0278132	-0.00020874	0.000143083	0.144599	0.157674
cg06961429	6	-1.37811e-05	0.00430322	0.997445	-0.00171898	0.0063701	0.787274	0.0963877	-0.000363725	7.68271e-05	2.19782e-06	-0.000386356	0.0001708	0.0236948	0.00310183	0.000154151	9.34045e-05	0.09887	0.000205879	0.000141341	0.145223	0.0916286
cg22438763	6	0.00204644	0.00691558	0.767293	0.00503824	0.0118386	0.670416	0.0314673	0.00137384	0.000120332	3.43461e-30	0.00131107	0.000282125	3.36612e-06	0.000832308	-0.000370298	0.000147955	0.0123224	-0.000450119	0.000309297	0.145587	0.00266952
cg22653878	6	0.0142442	0.00413911	0.000578789	0.0142442	0.00413911	0.000578789	0.951433	-0.000465765	7.23948e-05	1.24547e-10	-0.000465765	7.23948e-05	1.24547e-10	0.648044	-0.000128824	8.90139e-05	0.147832	-0.000128824	8.90139e-05	0.147832	0.974405
cg07337250	6	0.00555698	0.00449534	0.216397	0.00555698	0.00449534	0.216397	0.984883	-0.00034132	7.98997e-05	1.93857e-05	-0.000349358	9.63104e-05	0.000286271	0.266511	0.000140506	9.72939e-05	0.1487	0.000140506	9.72939e-05	0.1487	0.907418
cg00857536	6	-5.66402e-05	0.00384081	0.988234	-0.000251626	0.00445075	0.954915	0.282953	-0.000306319	6.83743e-05	7.46306e-06	-0.000298593	7.81825e-05	0.000133897	0.314675	0.000151246	8.24024e-05	0.0664379	0.000153257	0.000106173	0.148888	0.192513
cg23372795	5	0.000916013	0.00457286	0.841234	0.00153713	0.00680448	0.82128	0.089441	-0.00041128	8.08922e-05	3.68984e-07	-0.000413504	8.6553e-05	1.77517e-06	0.356927	0.000255763	9.9266e-05	0.00997947	0.00022792	0.000158334	0.150014	0.0630415
cg18511011	6	0.00229167	0.00350145	0.512794	0.00229167	0.00350145	0.512794	0.690806	-0.000412734	6.11963e-05	1.53629e-11	-0.000412734	6.11963e-05	1.53629e-11	0.613861	0.000108145	7.52024e-05	0.15042	0.000108145	7.52024e-05	0.15042	0.703539
cg02571055	6	0.0176007	0.00496014	0.000387525	0.0176007	0.00496014	0.000387525	0.699591	-0.000383388	8.9142e-05	1.70129e-05	-0.000397614	0.000108707	0.000254512	0.261429	-0.00015483	0.000107901	0.151306	-0.00015483	0.000107901	0.151306	0.644131
cg15785898	6	-0.003267	0.0058362	0.575628	-0.003267	0.0058362	0.575628	0.683868	0.000229897	0.000101351	0.0233102	0.000229897	0.000101351	0.0233102	0.547416	-0.000178594	0.000124502	0.151437	-0.000178594	0.000124502	0.151437	0.614955
cg19000647	5	-0.00125111	0.0046124	0.786199	-0.00125111	0.0046124	0.786199	0.842137	0.00050921	8.01966e-05	2.15992e-10	0.00050921	8.01966e-05	2.15992e-10	0.99961	-0.000141724	9.88566e-05	0.151677	-0.000141724	9.88566e-05	0.151677	0.957026
cg16862791	6	-0.0105261	0.00306172	0.000586087	-0.0112916	0.00464946	0.015158	0.0848988	4.58615e-05	5.33313e-05	0.389825	4.61565e-05	5.45405e-05	0.397397	0.400414	0.000129645	6.57256e-05	0.0485499	0.000151256	0.00010566	0.152275	0.0587928
cg05492904	6	-0.0046404	0.00478732	0.33239	-0.00482197	0.00772391	0.532436	0.0521036	-0.000105005	8.33196e-05	0.207572	-0.000198101	0.000167323	0.236437	0.00955945	0.000266376	0.000102114	0.00909058	0.000251921	0.000176674	0.153895	0.0290544
cg03729204	6	0.00210088	0.00382824	0.583153	0.000976886	0.00522292	0.851631	0.144872	-0.000392471	6.80147e-05	7.90874e-09	-0.000390304	0.000105187	0.000206792	0.0937601	0.000147643	8.24231e-05	0.0732479	0.000168848	0.000118418	0.153905	0.115772
cg24468934	6	-0.00195991	0.00411245	0.633661	0.000207909	0.00615479	0.973053	0.108396	-5.7197e-05	7.15129e-05	0.423819	-1.37286e-05	0.000118735	0.90795	0.0805406	0.000200189	8.74154e-05	0.0220164	0.000166696	0.000117133	0.154699	0.190869
cg23021584	6	-0.00154125	0.00430634	0.720417	-0.00154125	0.00430634	0.720417	0.947147	0.000494205	7.54487e-05	5.74541e-11	0.000494205	7.54487e-05	5.74541e-11	0.610635	-0.000131294	9.2264e-05	0.154727	-0.000131294	9.2264e-05	0.154727	0.873757
cg12058501	6	0.000433722	0.0035404	0.902498	0.000433722	0.0035404	0.902498	0.763339	-0.000330785	6.23508e-05	1.12537e-07	-0.000330785	6.23508e-05	1.12537e-07	0.545067	0.000107271	7.53878e-05	0.15476	0.000107271	7.53878e-05	0.15476	0.419181
cg26946015	6	0.00243913	0.00387442	0.52899	0.00243913	0.00387442	0.52899	0.972726	-0.000326446	6.79743e-05	1.56702e-06	-0.000326446	6.79743e-05	1.56702e-06	0.649675	0.000118129	8.30444e-05	0.154888	0.000118129	8.30444e-05	0.154888	0.780519
cg00583535	6	0.0017017	0.00557716	0.760275	0.0017017	0.00557716	0.760275	0.628328	0.000528189	9.86846e-05	8.68482e-08	0.000535976	0.000145145	0.000221889	0.126012	0.000177221	0.000120621	0.141769	0.000174805	0.000123339	0.156406	0.398232
cg21484315	6	0.00354688	0.0044192	0.422202	0.00354688	0.0044192	0.422202	0.922204	-0.000296762	7.73713e-05	0.000125283	-0.000296762	7.73713e-05	0.000125283	0.829911	0.00013361	9.45556e-05	0.157646	0.00013361	9.45556e-05	0.157646	0.846162
cg10512535	6	0.00122502	0.0043501	0.778245	0.00121918	0.00453172	0.787904	0.380899	-0.00037672	7.69085e-05	9.66733e-07	-0.00035339	0.000133293	0.0080198	0.0376815	0.000132212	9.40755e-05	0.159907	0.000132212	9.40755e-05	0.159907	0.593156
cg11525252	6	0.0149366	0.00374285	6.58754e-05	0.0145024	0.00528289	0.00604799	0.134511	0.000235068	6.53156e-05	0.000319501	0.000255821	0.000127466	0.0447524	0.0154704	-0.000186899	7.96776e-05	0.018992	-0.000181298	0.000129133	0.160328	0.0565792
cg14876517	6	0.002134	0.00390133	0.584383	0.00226299	0.0041459	0.585178	0.366253	-0.000399126	6.83615e-05	5.26866e-09	-0.000399126	6.83615e-05	5.26866e-09	0.461352	0.000118292	8.43129e-05	0.160613	0.000118292	8.43129e-05	0.160613	0.57363
cg26362368	6	0.00887769	0.0030675	0.00380235	0.00887769	0.0030675	0.00380235	0.6266	3.06749e-05	5.31283e-05	0.563686	3.06749e-05	5.31283e-05	0.563686	0.531709	-9.2397e-05	6.55005e-05	0.158353	-9.23132e-05	6.58262e-05	0.160803	0.412805
cg04461678	6	0.0141074	0.00448981	0.00167748	0.0141074	0.00448981	0.00167748	0.532667	-4.55097e-05	7.81642e-05	0.56041	-4.55097e-05	7.81642e-05	0.56041	0.478638	-0.000146369	9.55066e-05	0.125387	-0.000149053	0.000106376	0.161157	0.32995
cg12976145	5	0.00250756	0.00421158	0.551578	0.00250756	0.00421158	0.551578	0.946601	-0.000408193	7.36237e-05	2.95095e-08	-0.000410372	7.9864e-05	2.77104e-07	0.349993	0.000127161	9.07729e-05	0.161253	0.000127161	9.07729e-05	0.161253	0.823466
cg06900494	6	0.0020551	0.0047445	0.664902	0.0020551	0.0047445	0.664902	0.901329	-0.000473283	8.40966e-05	1.82469e-08	-0.000473283	8.40966e-05	1.82469e-08	0.844161	0.000143388	0.000102741	0.162826	0.000143388	0.000102741	0.162826	0.934008
cg14989226	6	0.017054	0.00539707	0.00157844	0.017054	0.00539707	0.00157844	0.725956	-0.000929469	9.39772e-05	4.58328e-23	-0.000930122	9.49606e-05	1.18514e-22	0.409395	-0.000161182	0.000115642	0.163378	-0.000161182	0.000115642	0.163378	0.790382
cg02616368	6	0.00438638	0.0031392	0.162327	0.00438638	0.0031392	0.162327	0.793314	-0.000396641	5.48368e-05	4.72011e-13	-0.000396641	5.48368e-05	4.72011e-13	0.908217	9.36445e-05	6.72117e-05	0.163536	9.36445e-05	6.72117e-05	0.163536	0.860215
cg27629673	6	0.0008178	0.00419338	0.845376	0.0008178	0.00419338	0.845376	0.889759	-0.000222128	7.32421e-05	0.00242297	-0.000243336	9.48098e-05	0.0102712	0.22674	0.000126412	9.08112e-05	0.163913	0.000126412	9.08112e-05	0.163913	0.810928
cg24825210	5	0.00382106	0.00355537	0.282495	0.00382106	0.00355537	0.282495	0.682727	-0.000341598	6.2538e-05	4.70118e-08	-0.000341598	6.2538e-05	4.70118e-08	0.663901	0.000106588	7.65804e-05	0.163971	0.000106588	7.65804e-05	0.163971	0.544998
cg27528351	6	0.0166067	0.00515355	0.00127133	0.0166067	0.00515355	0.00127133	0.669566	0.000466577	9.09337e-05	2.8828e-07	0.000466577	9.09337e-05	2.8828e-07	0.594352	-0.000154485	0.000111081	0.164304	-0.000154485	0.000111081	0.164304	0.803465
cg23395692	6	0.00188465	0.00328024	0.565597	0.00188465	0.00328024	0.565597	0.72735	-0.000305238	5.76904e-05	1.21666e-07	-0.000305238	5.76904e-05	1.21666e-07	0.775673	9.83597e-05	7.08112e-05	0.16482	9.83597e-05	7.08112e-05	0.16482	0.720607
cg07817608	5	0.000615651	0.00335418	0.854369	0.000615651	0.00335418	0.854369	0.631858	5.83992e-05	5.88583e-05	0.3211	5.83992e-05	5.88583e-05	0.3211	0.6363	0.000110767	7.23387e-05	0.125714	0.000107309	7.72942e-05	0.165041	0.354067
cg26381919	6	-0.00304724	0.00301188	0.311662	-0.0027498	0.00441668	0.533551	0.0925517	-0.000328155	5.32521e-05	7.17002e-10	-0.000328155	5.32521e-05	7.17002e-10	0.566722	0.00017337	6.46522e-05	0.00732763	0.000156614	0.000113168	0.166387	0.0210704
cg20744108	6	0.00257135	0.00394024	0.514021	0.00257135	0.00394024	0.514021	0.582427	-0.000368812	7.01904e-05	1.48464e-07	-0.000366236	7.79763e-05	2.64321e-06	0.336394	0.00011749	8.5372e-05	0.168756	0.00011749	8.5372e-05	0.168756	0.711807
cg24264285	6	0.00208157	0.0038099	0.58482	0.00194079	0.00438474	0.658038	0.297165	-0.000251058	6.64487e-05	0.000157953	-0.000295851	9.69115e-05	0.00226723	0.129375	0.000159807	8.198e-05	0.0512551	0.000155628	0.000113236	0.169327	0.151065
cg00522935	5	-0.00160113	0.00425944	0.706989	-0.000230524	0.00604809	0.969596	0.120875	-0.000123017	7.5007e-05	0.10099	-0.000110203	0.000108736	0.310825	0.135237	0.000229558	9.24796e-05	0.0130553	0.000190524	0.00013866	0.169429	0.0986409
cg22021794	6	0.00157842	0.00410904	0.70088	0.00120918	0.00457593	0.791589	0.327186	-6.28754e-05	7.30153e-05	0.389169	-7.41513e-05	9.1507e-05	0.417748	0.251177	0.000126196	8.76441e-05	0.149906	0.000128862	9.4072e-05	0.170741	0.362354
cg01782024	5	0.0130086	0.0040946	0.00148795	0.0130086	0.0040946	0.00148795	0.607313	8.881e-05	7.16792e-05	0.215348	8.881e-05	7.16792e-05	0.215348	0.432073	-0.000130399	8.84222e-05	0.140284	-0.000131867	9.63079e-05	0.170929	0.343271
cg05670193	6	0.0111599	0.00327979	0.000667375	0.0111779	0.00332854	0.000784503	0.403551	-3.84317e-05	5.82055e-05	0.509076	-3.84317e-05	5.82055e-05	0.509076	0.824656	-0.000101493	7.0889e-05	0.152226	-0.000103218	7.55135e-05	0.171661	0.366069
cg26788812	6	0.000300495	0.00332399	0.927968	0.000300495	0.00332399	0.927968	0.433981	-0.000401176	5.83009e-05	5.93795e-12	-0.000401176	5.83009e-05	5.93795e-12	0.524675	0.000125621	7.10121e-05	0.076892	0.000120004	8.78407e-05	0.171889	0.241951
cg08839272	6	0.0109599	0.00357892	0.00219617	0.0144293	0.00601351	0.0164182	0.0442201	0.000142775	6.20468e-05	0.0213873	0.000111192	9.47835e-05	0.240747	0.11437	-8.16417e-05	7.66668e-05	0.286925	-0.000191766	0.000140877	0.173439	0.0208781
cg04779796	6	-0.000852505	0.00495562	0.863416	-0.00172181	0.00827193	0.835111	0.0375319	-0.000222757	8.72555e-05	0.0106823	-0.000216521	0.00010411	0.0375509	0.282849	0.000226577	0.000106272	0.0330037	0.000233528	0.000171702	0.173807	0.0514509
cg10417386	6	0.0180166	0.00558805	0.00126355	0.0180166	0.00558805	0.00126355	0.885243	-0.000419538	9.6873e-05	1.48561e-05	-0.000419538	9.6873e-05	1.48561e-05	0.681412	-0.000161519	0.000118778	0.173882	-0.000161519	0.000118778	0.173882	0.892548
cg08949974	6	-0.0129333	0.00419369	0.00204244	-0.0199449	0.00841254	0.017747	0.00715538	0.000118541	7.23218e-05	0.101198	7.09504e-05	0.000127632	0.57828	0.0473323	9.08926e-05	8.90472e-05	0.307385	0.000243072	0.00017941	0.175468	0.00823381
cg06543101	6	0.0123964	0.00327418	0.000153019	0.0125647	0.00362306	0.000524373	0.333025	-0.000397593	5.72258e-05	3.71021e-12	-0.000397593	5.72258e-05	3.71021e-12	0.721555	-0.000107124	7.00867e-05	0.126402	-0.000123416	9.14207e-05	0.177023	0.199964
cg20970369	6	0.0153073	0.00516407	0.00303479	0.0166927	0.00670989	0.0128547	0.194628	0.000166584	8.95912e-05	0.0629728	0.000138954	0.000110691	0.20936	0.25909	-0.000163742	0.000109974	0.13651	-0.000215746	0.000160032	0.177612	0.113093
cg07624008	6	0.012034	0.0041952	0.00412407	0.012034	0.0041952	0.00412407	0.734383	-0.000274059	7.37076e-05	0.000200657	-0.000274059	7.37076e-05	0.000200657	0.478512	-0.000121553	9.01836e-05	0.17771	-0.000121553	9.01836e-05	0.17771	0.621509
cg08822136	6	0.0225067	0.00656321	0.000605327	0.0213427	0.0084497	0.0115419	0.201231	0.000365569	0.000115213	0.00150883	0.000299941	0.000190432	0.115242	0.0654549	-0.00026101	0.00014053	0.063264	-0.000239413	0.000177883	0.178335	0.220252
cg20706468	6	0.00216277	0.00379013	0.568249	0.00216277	0.00379013	0.568249	0.638334	-0.000285176	6.65626e-05	1.83285e-05	-0.000282764	8.03735e-05	0.000434607	0.275169	0.000110163	8.15093e-05	0.176524	0.000109944	8.1734e-05	0.17858	0.413806
cg16941122	6	0.00673773	0.00487331	0.166795	0.00673773	0.00487331	0.166795	0.740936	-0.000289201	8.53566e-05	0.000703663	-0.000289201	8.53566e-05	0.000703663	0.714415	0.000139855	0.000104736	0.181776	0.000139855	0.000104736	0.181776	0.490156
cg03582787	6	0.000720326	0.00332083	0.828277	0.000720326	0.00332083	0.828277	0.551261	-0.000460281	5.84313e-05	3.34526e-15	-0.000460281	5.84313e-05	3.34526e-15	0.848128	9.54389e-05	7.14838e-05	0.18184	9.54389e-05	7.14838e-05	0.18184	0.440626
cg24320225	6	0.0232518	0.00776435	0.00274728	0.0293555	0.0135037	0.0297133	0.0234233	-0.000104023	0.000138636	0.453055	-7.69937e-05	0.000196099	0.694596	0.14316	-0.000239916	0.000168115	0.153552	-0.00038863	0.000292276	0.183627	0.0226228
cg07959986	5	0.00256047	0.00408385	0.530675	0.00256047	0.00408385	0.530675	0.480831	-0.000110649	7.2466e-05	0.126783	-0.000166099	0.000125319	0.185037	0.0424471	0.000118215	8.91197e-05	0.184682	0.000118215	8.91197e-05	0.184682	0.622683
cg10371414	6	-0.0212184	0.00696013	0.00229935	-0.021414	0.00765498	0.00515156	0.338248	0.000264421	0.000120188	0.0278023	0.000264421	0.000120188	0.0278023	0.62484	0.000210654	0.000148419	0.155805	0.000230606	0.000173919	0.18486	0.289007
cg01967416	6	-0.00435386	0.00352237	0.216437	-0.00304612	0.00468189	0.515294	0.163387	-0.000357023	6.21603e-05	9.26904e-09	-0.000361038	9.04845e-05	6.60571e-05	0.122146	0.000222851	7.58479e-05	0.00330203	0.00016471	0.000124269	0.185028	0.041912
cg00532502	6	-0.00340141	0.00380431	0.371272	-0.00220286	0.00521569	0.672768	0.14057	-0.000434098	6.71337e-05	1.00513e-10	-0.000328367	0.000145127	0.0236597	0.0027684	0.000225427	8.16787e-05	0.00578152	0.000175882	0.000132966	0.185915	0.045218
cg01675241	6	0.00928705	0.00305121	0.00233668	0.00928705	0.00305121	0.00233668	0.92578	-0.000351983	5.23184e-05	1.72363e-11	-0.000351983	5.23184e-05	1.72363e-11	0.909905	-8.5727e-05	6.48578e-05	0.186245	-8.5727e-05	6.48578e-05	0.186245	0.844718
cg16273979	5	-0.000650289	0.00510712	0.898679	-0.001715	0.00694852	0.805051	0.141216	-0.000491296	9.2037e-05	9.39606e-08	-0.000582696	0.000185598	0.001692	0.0115323	0.000202772	0.000111328	0.0685463	0.000224178	0.000169608	0.186254	0.0798283
cg17759095	6	0.0184027	0.00598187	0.00209512	0.0184027	0.00598187	0.00209512	0.818489	-0.00010236	0.000104202	0.325939	-0.00010236	0.000104202	0.325939	0.623453	-0.000168887	0.000128467	0.188633	-0.000168887	0.000128467	0.188633	0.730168
cg18618815	6	0.0217141	0.00507353	1.86988e-05	0.0183502	0.00812661	0.0239429	0.0564488	-0.00187187	8.87217e-05	8.25594e-99	-0.00187187	8.87217e-05	8.25594e-99	0.582441	-0.000302314	0.000109326	0.00568811	-0.000236689	0.00018015	0.1889	0.0468039
cg23203234	6	0.0118736	0.00364312	0.00111735	0.0118736	0.00364312	0.00111735	0.812221	-7.4876e-05	6.42921e-05	0.244172	-7.4876e-05	6.42921e-05	0.244172	0.479195	-0.0001028	7.86094e-05	0.190964	-0.0001028	7.86094e-05	0.190964	0.820403
cg20538707	6	0.011933	0.00451395	0.00820355	0.0134112	0.00578461	0.0204256	0.200378	-0.000223379	7.91698e-05	0.00477976	-0.000223379	7.91698e-05	0.00477976	0.782244	-0.0001274	9.66862e-05	0.187617	-0.000185664	0.000142511	0.19264	0.0982362
cg08610076	6	0.0119909	0.00399119	0.00266148	0.0120335	0.00416684	0.00387792	0.380459	0.000127332	6.96238e-05	0.0674207	8.95134e-05	9.62266e-05	0.352249	0.166121	-0.000127069	8.58997e-05	0.139068	-0.000129477	9.94831e-05	0.193088	0.296151
cg21979032	6	0.000997215	0.00390339	0.798357	0.00101807	0.0039448	0.796346	0.40674	1.01844e-05	6.91047e-05	0.882835	1.01844e-05	6.91047e-05	0.882835	0.619933	0.000108758	8.3575e-05	0.193147	0.000108758	8.3575e-05	0.193147	0.448572
cg21208682	6	-0.00303288	0.00500002	0.544134	-0.00303288	0.00500002	0.544134	0.812349	0.000418189	8.55964e-05	1.0312e-06	0.000418189	8.55964e-05	1.0312e-06	0.486056	-0.000137379	0.000106015	0.195031	-0.000137379	0.000106015	0.195031	0.687088
cg17962384	5	-0.00401038	0.00442187	0.364437	-0.00401038	0.00442187	0.364437	0.70224	0.000556639	7.89882e-05	1.82678e-12	0.000557023	9.21621e-05	1.50394e-09	0.28867	-0.000124969	9.65829e-05	0.195697	-0.000124969	9.65829e-05	0.195697	0.681968
cg06649856	6	-0.000476157	0.00483499	0.92155	0.000880019	0.00613168	0.885879	0.207549	-0.00039492	8.55913e-05	3.94938e-06	-0.000412515	0.000114831	0.000327699	0.192381	0.000219435	0.000104509	0.0357572	0.000184175	0.000143048	0.19792	0.150025
cg00090737	6	0.0129282	0.00436731	0.00307411	0.0155088	0.00626673	0.013332	0.10979	-0.000351597	7.75072e-05	5.72466e-06	-0.000351597	7.75072e-05	5.72466e-06	0.641624	-0.000112287	9.43581e-05	0.234041	-0.000184998	0.000143691	0.197931	0.0779204
cg16031846	6	0.0143753	0.00458062	0.00169942	0.0141627	0.00487212	0.00365041	0.359091	-0.00035559	8.38671e-05	2.23602e-05	-0.00035559	8.38671e-05	2.23602e-05	0.557075	-0.000129655	0.000100861	0.198623	-0.000129655	0.000100861	0.198623	0.492338
cg09185884	6	0.000175648	0.00493005	0.971579	7.97887e-05	0.00507641	0.98746	0.391077	0.00051986	8.67402e-05	2.05621e-09	0.00051181	9.21254e-05	2.76696e-08	0.37285	-0.000206785	0.000105876	0.050809	-0.000175291	0.000136411	0.198784	0.199163
cg00240178	6	0.00231183	0.00506535	0.648102	0.00207345	0.00531701	0.696562	0.3736	-0.000378223	9.00274e-05	2.65505e-05	-0.000413766	0.000170826	0.0154291	0.0153964	0.000143684	0.000108981	0.187358	0.000153887	0.000119898	0.199325	0.334603
cg18403193	6	0.00412383	0.00532722	0.438868	0.00412383	0.00532722	0.438868	0.840438	-0.000369435	9.63298e-05	0.000125511	-0.000369435	9.63298e-05	0.000125511	0.849168	0.000147978	0.000115935	0.20182	0.000147978	0.000115935	0.20182	0.785296
cg03887471	6	-0.0100242	0.00353465	0.0045685	-0.0100242	0.00353465	0.0045685	0.882155	0.000208622	6.12521e-05	0.000659318	0.000208622	6.12521e-05	0.000659318	0.657508	9.65124e-05	7.5667e-05	0.202137	9.65124e-05	7.5667e-05	0.202137	0.804623
cg02787615	6	0.012409	0.00394646	0.00166457	0.012409	0.00394646	0.00166457	0.98113	-0.000618804	6.96471e-05	6.40046e-19	-0.000618804	6.96471e-05	6.40046e-19	0.455856	-0.000108047	8.54141e-05	0.20588	-0.000108047	8.54141e-05	0.20588	0.911804
cg10310310	6	0.00316225	0.00382154	0.407964	0.00316225	0.00382154	0.407964	0.937142	-0.000205494	6.88373e-05	0.00283377	-0.000205494	6.88373e-05	0.00283377	0.538684	0.000105411	8.33366e-05	0.205913	0.000105411	8.33366e-05	0.205913	0.912664
cg24428232	6	0.0200959	0.00443017	5.7293e-06	0.0209963	0.00712544	0.00321215	0.061384	-0.000235304	7.71862e-05	0.00229967	-0.000235304	7.71862e-05	0.00229967	0.613724	-0.000169371	9.51011e-05	0.0749201	-0.000201706	0.000159662	0.206469	0.0482179
cg09807856	6	0.000574119	0.0030623	0.851285	0.000472825	0.00324689	0.884218	0.364953	-0.000165184	5.38446e-05	0.00215653	-0.000165184	5.38446e-05	0.00215653	0.966442	8.82792e-05	6.5863e-05	0.180133	9.71851e-05	7.69975e-05	0.206882	0.281003
cg00107046	6	0.00766289	0.00246704	0.00189571	0.00766289	0.00246704	0.00189571	0.461938	-0.000328222	4.31976e-05	3.00375e-14	-0.000299815	6.5138e-05	4.16923e-06	0.114521	-7.11082e-05	5.3295e-05	0.182126	-8.52247e-05	6.75827e-05	0.207294	0.22235
cg06916740	6	-5.16101e-05	0.0035088	0.988265	-7.72592e-07	0.00397622	0.999845	0.306942	-0.000126319	6.14301e-05	0.0397531	-0.000126319	6.14301e-05	0.0397531	0.529172	0.000112753	7.55734e-05	0.135706	0.000117464	9.32429e-05	0.207753	0.235102
cg10166664	6	0.000715331	0.00680401	0.91627	-0.00154596	0.0116181	0.894142	0.0320602	0.000248559	0.000118494	0.0359365	0.000293171	0.000174187	0.0923592	0.11924	0.000250838	0.000145755	0.0852589	0.000292344	0.000232398	0.208412	0.0576745
cg21876925	5	0.000128385	0.00441974	0.976826	8.38697e-05	0.00449827	0.985124	0.391407	-5.41956e-05	7.81579e-05	0.488051	-4.75851e-05	0.000107109	0.65685	0.178408	-0.000184549	9.53105e-05	0.0528321	-0.000159902	0.000127341	0.209223	0.176195
cg17552471	6	0.0124009	0.00344021	0.000312523	0.0140023	0.00459549	0.00231165	0.15375	-1.23173e-05	6.11383e-05	0.840334	1.22011e-05	0.000104455	0.907014	0.0406883	-7.90774e-05	7.39233e-05	0.284744	-0.000151556	0.000120908	0.210031	0.0397395
cg01262865	6	0.0109943	0.00297968	0.000224457	0.011161	0.00416493	0.00736755	0.13981	-0.000367367	5.21595e-05	1.87942e-12	-0.000367367	5.21595e-05	1.87942e-12	0.885924	-0.000109303	6.43293e-05	0.0892971	-0.000124405	9.93797e-05	0.210639	0.0783599
cg27130075	6	0.00239933	0.00411376	0.559729	0.000664633	0.00544901	0.90292	0.173252	-0.000298402	7.26718e-05	4.02293e-05	-0.000354778	0.000126069	0.00489066	0.0406822	0.000109193	8.90719e-05	0.220238	0.000154309	0.000123487	0.211444	0.142774
cg04944536	6	0.00105169	0.00439556	0.810902	0.00105169	0.00439556	0.810902	0.577116	-0.00012262	7.76398e-05	0.114258	-0.00012262	7.76398e-05	0.114258	0.541124	0.000127943	9.46668e-05	0.176531	0.000125859	0.00010073	0.211492	0.36422
cg00028929	6	0.00300874	0.00536262	0.574757	0.00300874	0.00536262	0.574757	0.669636	-5.79916e-05	9.51079e-05	0.54203	-5.79916e-05	9.51079e-05	0.54203	0.766247	0.000142751	0.000114714	0.213347	0.000142751	0.000114714	0.213347	0.860937
cg17178761	6	-0.00214817	0.00416528	0.60604	-0.00214817	0.00416528	0.60604	0.908313	9.60559e-05	7.51333e-05	0.201083	9.60559e-05	7.51333e-05	0.201083	0.733964	-0.000111714	9.00035e-05	0.214524	-0.000111714	9.00035e-05	0.214524	0.904624
cg26283480	6	-0.000554933	0.00310757	0.858272	-0.000152949	0.00362197	0.966317	0.29608	-0.000623093	5.40355e-05	9.18688e-31	-0.000621661	8.05823e-05	1.21352e-14	0.136466	0.000122229	6.65795e-05	0.0663828	0.000107808	8.69138e-05	0.214827	0.213664
cg14868222	6	0.0140715	0.00467552	0.00261584	0.0140715	0.00467552	0.00261584	0.741462	-0.000699486	8.28277e-05	3.03856e-17	-0.000699486	8.28277e-05	3.03856e-17	0.944133	-0.000125705	0.000101413	0.215147	-0.000125705	0.000101413	0.215147	0.455467
cg00532335	6	0.00228401	0.00423832	0.589959	0.00228401	0.00423832	0.589959	0.504636	-0.000270622	7.47873e-05	0.000296257	-0.000270622	7.47873e-05	0.000296257	0.519549	0.000113734	9.18267e-05	0.215505	0.000113734	9.18267e-05	0.215505	0.753996
cg14406134	6	0.00331145	0.00391638	0.397811	0.00331145	0.00391638	0.397811	0.58511	-0.000709866	6.88202e-05	6.04151e-25	-0.000709866	6.88202e-05	6.04151e-25	0.453223	0.000123819	8.41896e-05	0.141368	0.000116666	9.4289e-05	0.215967	0.321359
cg02193425	6	0.00317408	0.00384503	0.409087	0.00317408	0.00384503	0.409087	0.840951	-0.000256091	6.93997e-05	0.000224173	-0.000255374	7.35609e-05	0.000517373	0.3717	0.000104235	8.42828e-05	0.216188	0.000104235	8.42828e-05	0.216188	0.773715
cg23985641	6	0.0164596	0.0050058	0.00100863	0.0164596	0.0050058	0.00100863	0.700067	-0.00051882	8.88743e-05	5.29313e-09	-0.00051882	8.88743e-05	5.29313e-09	0.752065	-0.000134145	0.000108601	0.21675	-0.000134145	0.000108601	0.21675	0.80391
cg18712349	6	-0.0015481	0.00333079	0.642085	-0.000856821	0.00502012	0.864478	0.0815386	-0.000204998	5.84848e-05	0.000456345	-0.000206754	0.000104529	0.0479327	0.0284249	0.000161074	7.12458e-05	0.0237708	0.000135874	0.000110116	0.217235	0.0684496
cg05849612	6	0.00168704	0.00448041	0.706517	-0.000660368	0.00770627	0.931711	0.0270186	-0.000248736	7.96381e-05	0.00178818	-0.000293386	0.000127296	0.0211809	0.0778515	0.000127657	9.67443e-05	0.186991	0.000196218	0.000160215	0.220683	0.0427353
cg01852522	6	0.00115473	0.0050997	0.820866	0.00115473	0.0050997	0.820866	0.518086	-0.000714267	8.94456e-05	1.39967e-15	-0.000714267	8.94456e-05	1.39967e-15	0.684452	0.000146748	0.000109578	0.180502	0.000141095	0.000115417	0.221528	0.376151
cg08453903	6	0.00189789	0.00743116	0.798417	0.00189789	0.00743116	0.798417	0.565317	-0.000138468	0.000132343	0.295431	-0.000145904	0.000182148	0.42312	0.166063	0.000195798	0.000160265	0.221817	0.000195798	0.000160265	0.221817	0.626147
cg09108532	6	0.0141898	0.00377991	0.000174025	0.0138925	0.00430372	0.00124645	0.315187	-0.000559093	6.50837e-05	8.66868e-18	-0.000559093	6.50837e-05	8.66868e-18	0.622779	-9.84267e-05	8.05739e-05	0.22187	-9.84267e-05	8.05739e-05	0.22187	0.459178
cg06143615	6	-0.00108927	0.0031841	0.732279	0.000125243	0.00478646	0.979125	0.0948322	8.99272e-05	5.5586e-05	0.105705	8.99272e-05	5.5586e-05	0.105705	0.459272	0.000171059	6.87886e-05	0.0128921	0.00013381	0.000109874	0.223279	0.0680363
cg19176553	6	0.0164625	0.00576987	0.00432841	0.0167103	0.00610541	0.00620092	0.36783	0.000360055	0.000101866	0.000408423	0.000360055	0.000101866	0.000408423	0.886939	-0.000151456	0.000124712	0.224576	-0.000151456	0.000124712	0.224576	0.478689
cg21198586	6	0.00981139	0.00357178	0.00601583	0.00981139	0.00357178	0.00601583	0.725309	7.04349e-05	6.27578e-05	0.261723	7.04349e-05	6.27578e-05	0.261723	0.454934	-9.32424e-05	7.7039e-05	0.226153	-9.32424e-05	7.7039e-05	0.226153	0.533466
cg11830605	6	0.0201684	0.00698509	0.00388494	0.0201684	0.00698509	0.00388494	0.429093	-0.000107845	0.000125041	0.388426	-0.000107845	0.000125041	0.388426	0.596478	-0.000182352	0.000151122	0.227565	-0.000182352	0.000151122	0.227565	0.593963
cg04626878	6	0.00625287	0.00232841	0.00724287	0.00625287	0.00232841	0.00724287	0.447229	-0.00019871	4.01747e-05	7.5695e-07	-0.00019871	4.01747e-05	7.5695e-07	0.482187	-5.87302e-05	4.88964e-05	0.229707	-5.94611e-05	4.93989e-05	0.228708	0.410267
cg13180098	6	4.74326e-05	0.003085	0.987733	-0.000137318	0.00414475	0.97357	0.160741	-0.000352145	5.42537e-05	8.54319e-11	-0.000334159	8.53608e-05	9.05301e-05	0.0805626	0.000122253	6.614e-05	0.064545	0.000114598	9.5217e-05	0.228767	0.114215
cg19141411	6	0.00199348	0.0045492	0.661238	0.00199348	0.0045492	0.661238	0.972613	-0.000344437	7.85583e-05	1.16264e-05	-0.000344437	7.85583e-05	1.16264e-05	0.715568	0.000116346	9.70195e-05	0.230449	0.000116346	9.70195e-05	0.230449	0.952422
cg11820931	6	0.00451236	0.00492652	0.359703	0.00451236	0.00492652	0.359703	0.751217	-0.000153733	8.78765e-05	0.0802175	-0.000136319	0.000136301	0.317246	0.0850868	0.000128382	0.000107135	0.230793	0.000128382	0.000107135	0.230793	0.876753
cg18325389	6	0.00149201	0.0044871	0.739503	0.00106636	0.00509797	0.834313	0.310771	-0.000713599	7.78822e-05	5.06903e-20	-0.000731583	0.000152053	1.49892e-06	0.0132142	0.000123496	9.54082e-05	0.195528	0.000130595	0.000109167	0.231587	0.310162
cg05439368	6	0.0172964	0.00554373	0.00180855	0.0172964	0.00554373	0.00180855	0.549835	-0.000572538	9.72326e-05	3.9011e-09	-0.000572538	9.72326e-05	3.9011e-09	0.684012	-0.000142897	0.000119554	0.231988	-0.000142897	0.000119554	0.231988	0.774941
cg22855237	6	0.00165229	0.00364826	0.650622	0.00165229	0.00364826	0.650622	0.742232	-0.000279574	6.45877e-05	1.50058e-05	-0.000279574	6.45877e-05	1.50058e-05	0.983883	9.3301e-05	7.81662e-05	0.232625	9.3301e-05	7.81662e-05	0.232625	0.549536
cg18229396	5	0.00432703	0.00452636	0.339091	0.00432703	0.00452636	0.339091	0.483473	-0.00034962	8.07383e-05	1.4892e-05	-0.00034962	8.07383e-05	1.4892e-05	0.543558	0.000153918	9.87669e-05	0.119138	0.000136508	0.000114385	0.232713	0.278378
cg15209604	6	0.00181515	0.00406613	0.655302	0.00181515	0.00406613	0.655302	0.931062	7.70088e-05	7.17698e-05	0.283273	7.70088e-05	7.17698e-05	0.283273	0.82667	0.000104955	8.80511e-05	0.233269	0.000104955	8.80511e-05	0.233269	0.755027
cg15009198	5	-0.00205138	0.00580894	0.723982	-0.00136837	0.00642098	0.831242	0.327683	0.000209825	0.000101469	0.0386518	0.000249148	0.0001379	0.0708039	0.19477	-0.000148209	0.000124567	0.234127	-0.000148209	0.000124567	0.234127	0.433973
cg07772781	6	-0.00301977	0.00592943	0.610552	-0.00301977	0.00592943	0.610552	0.573534	-0.000547684	0.000104654	1.66541e-07	-0.000547684	0.000104654	1.66541e-07	0.656481	-0.000150815	0.000126898	0.234645	-0.000150815	0.000126898	0.234645	0.454111
cg11891925	6	0.00512383	0.00539986	0.342681	0.00464679	0.00655602	0.47846	0.260067	-0.00135502	9.35213e-05	1.42506e-47	-0.00143736	0.000185533	9.39331e-15	0.0139361	0.000137231	0.000115551	0.234985	0.000137231	0.000115551	0.234985	0.430128
cg02433979	6	0.00245082	0.00354637	0.489516	0.0026257	0.00372714	0.481133	0.37768	-0.000243857	6.1696e-05	7.73185e-05	-0.000243857	6.1696e-05	7.73185e-05	0.647089	0.000113057	7.59744e-05	0.136725	9.96788e-05	8.49724e-05	0.240767	0.330183
cg27425169	6	0.00201566	0.00490548	0.681146	0.00201566	0.00490548	0.681146	0.910223	-0.00030861	8.43169e-05	0.000252093	-0.00030861	8.43169e-05	0.000252093	0.624035	0.000123552	0.000105325	0.240774	0.000123552	0.000105325	0.240774	0.869603
cg13393433	6	-9.45098e-05	0.0038056	0.980187	0.00019353	0.0055427	0.972147	0.114782	0.000437439	6.58764e-05	3.13042e-11	0.000437439	6.58764e-05	3.13042e-11	0.66941	-0.000147411	8.06787e-05	0.0676793	-0.000150935	0.000128769	0.241141	0.0667464
cg24607283	6	0.00359727	0.00408666	0.378726	0.00359727	0.00408666	0.378726	0.970474	-0.000391692	7.23266e-05	6.10842e-08	-0.000391692	7.23266e-05	6.10842e-08	0.973427	0.000103372	8.82888e-05	0.241665	0.000103372	8.82888e-05	0.241665	0.946501
cg19051213	6	0.00782076	0.00489958	0.110442	0.00782076	0.00489958	0.110442	0.465572	-0.000232039	8.62314e-05	0.00712618	-0.000258982	0.000117899	0.0280463	0.173481	0.000123147	0.000105702	0.244004	0.000123147	0.000105702	0.244004	0.621416
cg04255937	6	0.00272777	0.00466547	0.558769	0.00272777	0.00466547	0.558769	0.975769	-0.000285898	8.21412e-05	0.00050035	-0.000281423	8.82099e-05	0.00142083	0.362598	0.000117134	0.000100566	0.24412	0.000117134	0.000100566	0.24412	0.993626
cg02573551	6	0.00135648	0.00284314	0.633285	0.00172602	0.00312243	0.580413	0.342037	-0.000318582	4.95828e-05	1.31653e-10	-0.000318582	4.95828e-05	1.31653e-10	0.747305	0.00010685	6.0884e-05	0.0792629	8.67781e-05	7.49837e-05	0.247152	0.255937
cg00115639	6	0.00311011	0.00420996	0.460058	0.000780758	0.00633767	0.901954	0.0848085	-0.000160548	7.37726e-05	0.0295363	-0.00018145	0.000128509	0.157963	0.039796	0.00010311	9.03389e-05	0.253714	0.000167733	0.000146214	0.251311	0.051559
cg20697044	6	0.0123191	0.00437731	0.0048883	0.0123191	0.00437731	0.0048883	0.695726	-0.000307528	7.61529e-05	5.38411e-05	-0.000307528	7.61529e-05	5.38411e-05	0.744282	-0.000106985	9.32755e-05	0.251391	-0.000106985	9.32755e-05	0.251391	0.788529
cg22203237	5	0.00336348	0.00538272	0.532059	0.00464924	0.00834577	0.577475	0.0777546	-0.000575255	9.40862e-05	9.70848e-10	-0.000622515	0.000159671	9.67022e-05	0.0632858	0.000261257	0.000115768	0.0240246	0.000228519	0.000199958	0.253108	0.0422083
cg06465175	6	0.012088	0.00364666	0.000917038	0.012088	0.00364666	0.000917038	0.503084	-0.000367316	6.3982e-05	9.41599e-09	-0.000367316	6.3982e-05	9.41599e-09	0.442588	-9.43722e-05	7.91199e-05	0.232958	-0.00010743	9.42597e-05	0.2544	0.278266
cg10759648	5	0.0034445	0.00418149	0.410083	0.0034445	0.00418149	0.410083	0.554117	-0.000347516	7.38151e-05	2.50242e-06	-0.000361113	9.15862e-05	8.0512e-05	0.242678	0.000103706	9.10592e-05	0.254753	0.000103706	9.10592e-05	0.254753	0.578708
cg03035167	6	0.0150539	0.00399523	0.000164586	0.0150539	0.00399523	0.000164586	0.772808	-0.000678917	6.99714e-05	2.93406e-22	-0.000678917	6.99714e-05	2.93406e-22	0.941722	-9.77844e-05	8.59279e-05	0.255128	-9.77844e-05	8.59279e-05	0.255128	0.61828
cg05526364	6	0.00464536	0.00457754	0.310193	0.00464536	0.00457754	0.310193	0.739233	-0.000273374	8.17609e-05	0.000827044	-0.000286843	0.000133131	0.0311935	0.0615331	0.000111871	9.83216e-05	0.255199	0.000111871	9.83216e-05	0.255199	0.775469
cg22117819	6	0.0157973	0.00409362	0.00011385	0.0166219	0.00527159	0.00161544	0.193448	3.73561e-05	7.1965e-05	0.6037	-3.74714e-06	0.000104693	0.971449	0.129153	-0.000103276	8.76761e-05	0.238825	-0.000137883	0.000121552	0.256647	0.134447
cg15112747	6	-0.00216793	0.00402491	0.590144	-0.000377093	0.00606232	0.950401	0.0825909	-0.000234985	7.04279e-05	0.000848328	-0.000234985	7.04279e-05	0.000848328	0.670712	0.000229781	8.59514e-05	0.00750897	0.000165504	0.000145917	0.256696	0.0332975
cg26279183	6	0.00554419	0.00427038	0.194188	0.0046781	0.006468	0.469515	0.0825863	-0.000474515	7.48602e-05	2.31737e-10	-0.000473792	0.000105614	7.25464e-06	0.154035	0.00013636	9.1769e-05	0.137304	0.000144107	0.000127263	0.257486	0.143233
cg18728264	6	0.0130908	0.00414618	0.00159227	0.0138244	0.00546244	0.0113799	0.185909	0.000148767	7.25488e-05	0.0403087	0.000148767	7.25488e-05	0.0403087	0.853612	-0.00011667	8.94163e-05	0.191963	-0.000158564	0.00014077	0.259997	0.0728312
cg23782083	6	0.00533907	0.00610215	0.381602	0.00379295	0.00886877	0.668888	0.10101	-0.000618151	0.00010783	9.88931e-09	-0.000450308	0.000265686	0.0900962	0.000272968	0.000177808	0.000131397	0.175986	0.000209238	0.000185773	0.260035	0.122127
cg01348055	6	-0.00137364	0.00385673	0.721715	0.000277593	0.00562941	0.960671	0.101877	-0.000180749	6.77388e-05	0.00762311	-0.000166599	0.000126018	0.186161	0.0205134	0.00022742	8.30044e-05	0.00614667	0.000161192	0.000143226	0.260406	0.028433
cg20566475	6	0.000197814	0.00445148	0.964555	0.000430538	0.00490674	0.93008	0.336531	-0.000206762	7.73954e-05	0.00755128	-0.000206762	7.73954e-05	0.00755128	0.680223	0.000139983	9.503e-05	0.140741	0.000129891	0.000115532	0.260893	0.25726
cg06961439	6	-0.00239477	0.00448518	0.593391	-0.00239477	0.00448518	0.593391	0.434867	-0.000174303	7.89678e-05	0.0272959	-0.000209678	0.000103724	0.0432275	0.220857	-0.000110832	9.58692e-05	0.247652	-0.000109883	9.78413e-05	0.261407	0.401779
cg06073417	6	0.0100597	0.00362339	0.00549763	0.00969884	0.00389937	0.0128722	0.350677	-0.000460071	6.42284e-05	7.89004e-13	-0.000460071	6.42284e-05	7.89004e-13	0.499918	-9.21515e-05	7.85097e-05	0.240491	-8.98219e-05	8.00485e-05	0.261823	0.399735
cg08038291	6	0.00870434	0.00293478	0.00301775	0.00870434	0.00293478	0.00301775	0.501014	3.78897e-05	5.15266e-05	0.462131	3.78897e-05	5.15266e-05	0.462131	0.776637	-7.09e-05	6.32338e-05	0.262188	-7.09e-05	6.32338e-05	0.262188	0.459782
cg07993586	6	0.00632804	0.00415035	0.127334	0.00365577	0.00637032	0.566052	0.0705813	-9.638e-05	7.32672e-05	0.188355	-0.000101015	9.64865e-05	0.29513	0.196538	0.000110606	8.94563e-05	0.2163	0.000149646	0.000133635	0.262793	0.0864154
cg17280514	6	0.00274828	0.00501731	0.583857	0.00274828	0.00501731	0.583857	0.454469	-0.000886643	8.82345e-05	9.30739e-24	-0.000886643	8.82345e-05	9.30739e-24	0.67215	0.000159669	0.000108333	0.140517	0.000142763	0.000127542	0.262996	0.275135
cg14709253	6	-0.00232157	0.00421911	0.582147	-0.00232157	0.00421911	0.582147	0.569752	0.000488852	7.40734e-05	4.12353e-11	0.000488852	7.40734e-05	4.12353e-11	0.432138	-9.9979e-05	8.9429e-05	0.26358	-9.9979e-05	8.9429e-05	0.26358	0.781521
cg15888097	6	0.00182802	0.00403059	0.650163	0.00148578	0.00532949	0.780411	0.174153	-0.000243272	7.08063e-05	0.000590921	-0.000230153	0.000116014	0.0472745	0.0648707	0.000140285	8.6816e-05	0.106119	0.000142012	0.0001272	0.264231	0.105253
cg11010432	6	0.00242234	0.00385264	0.529514	0.00242234	0.00385264	0.529514	0.670987	-0.000321147	6.75916e-05	2.02131e-06	-0.000321147	6.75916e-05	2.02131e-06	0.768419	9.27955e-05	8.32205e-05	0.264827	9.27955e-05	8.32205e-05	0.264827	0.45795
cg08529744	5	0.0128572	0.00315843	4.68578e-05	0.0129489	0.00346696	0.000187767	0.330042	-0.000279579	5.49135e-05	3.55684e-07	-0.000279579	5.49135e-05	3.55684e-07	0.880446	-7.58088e-05	6.80675e-05	0.265395	-7.58088e-05	6.80675e-05	0.265395	0.427245
cg03405473	6	0.00282583	0.00334201	0.397804	0.00160793	0.00435512	0.711975	0.175953	-0.000305523	5.97396e-05	3.15004e-07	-0.000398292	0.000137348	0.00373299	0.00083586	8.02072e-05	7.20201e-05	0.265417	0.000116021	0.000104348	0.266194	0.0994425
cg04036049	6	0.00236672	0.00535772	0.658677	0.00236672	0.00535772	0.658677	0.465685	-2.10378e-05	9.34095e-05	0.821807	-8.93506e-06	0.000105278	0.932364	0.328566	0.000127486	0.000114722	0.266454	0.000127486	0.000114722	0.266454	0.659736
cg03011928	5	0.00276969	0.00442951	0.531787	0.00276969	0.00442951	0.531787	0.802379	-0.000332585	7.81424e-05	2.07987e-05	-0.000332585	7.81424e-05	2.07987e-05	0.939156	0.00010677	9.62222e-05	0.267165	0.00010677	9.62222e-05	0.267165	0.940179
cg20302414	6	0.0212291	0.00685847	0.00196612	0.0212291	0.00685847	0.00196612	0.451242	4.04018e-05	0.000124328	0.745209	4.04018e-05	0.000124328	0.745209	0.573738	-0.000165906	0.000149954	0.268563	-0.000165906	0.000149954	0.268563	0.466231
cg08134678	6	0.00352977	0.00506505	0.485874	0.00352977	0.00506505	0.485874	0.65767	-0.000482675	8.90396e-05	5.93e-08	-0.000482675	8.90396e-05	5.93e-08	0.609629	0.000135981	0.000108863	0.211624	0.00012792	0.00011573	0.269017	0.367079
cg12083893	6	0.00673455	0.00381986	0.0778942	0.00673455	0.00381986	0.0778942	0.60415	-4.99755e-06	6.60211e-05	0.939661	9.16853e-07	7.53684e-05	0.990294	0.318401	8.99577e-05	8.14838e-05	0.269595	8.99577e-05	8.14838e-05	0.269595	0.627751
cg20980653	6	0.00450722	0.00508827	0.375723	0.00450722	0.00508827	0.375723	0.999906	-0.00096257	8.89897e-05	2.87125e-27	-0.00096257	8.89897e-05	2.87125e-27	0.887554	0.00012064	0.000109671	0.271325	0.00012064	0.000109671	0.271325	0.990821
cg14839837	6	0.00271083	0.00449935	0.546846	0.00349668	0.00515254	0.497371	0.301432	-0.000365491	7.89988e-05	3.71835e-06	-0.000365491	7.89988e-05	3.71835e-06	0.42215	0.000150681	9.6528e-05	0.118522	0.000126187	0.0001149	0.272101	0.272841
cg00672277	6	0.000560914	0.00500202	0.910714	0.000693803	0.00557062	0.900882	0.324653	-0.00032686	8.80656e-05	0.000205992	-0.000375782	0.000138036	0.006482	0.0920397	0.000176517	0.000108119	0.10255	0.000158938	0.00014515	0.273518	0.174081
cg11822932	5	-0.00210707	0.00505827	0.677001	-0.0013925	0.006113	0.819807	0.247461	0.000321195	8.86269e-05	0.000289942	0.000321195	8.86269e-05	0.000289942	0.483598	-0.000129864	0.00010889	0.233017	-0.000155291	0.000142086	0.274421	0.199268
cg14419424	6	-0.00836877	0.00562711	0.136956	-0.00836877	0.00562711	0.136956	0.585562	0.000251079	9.7659e-05	0.0101412	0.000251079	9.7659e-05	0.0101412	0.930658	-0.000131372	0.000120346	0.275001	-0.000131372	0.000120346	0.275001	0.447835
cg05939560	6	0.0040144	0.00637676	0.528998	0.0040144	0.00637676	0.528998	0.746468	-0.000376403	0.000113272	0.00089052	-0.000393412	0.00013362	0.00323738	0.294849	0.000150785	0.000138166	0.275125	0.000150785	0.000138166	0.275125	0.563889
cg01420564	6	0.00403792	0.00445883	0.365147	0.00403792	0.00445883	0.365147	0.915978	-0.000398774	7.87774e-05	4.14798e-07	-0.000409012	9.87991e-05	3.47564e-05	0.245087	0.000104208	9.56976e-05	0.276184	0.000104208	9.56976e-05	0.276184	0.683798
cg00517261	6	0.0147177	0.00427168	0.000570183	0.0134899	0.00619891	0.029542	0.119866	-0.000172886	7.39956e-05	0.0194685	-0.000211642	0.000110288	0.0549843	0.129431	-0.000156786	9.13062e-05	0.0859534	-0.000139005	0.000127869	0.276998	0.151148
cg22032900	6	0.00087443	0.00398341	0.826247	0.000718751	0.00446272	0.872049	0.315121	-0.000448395	6.99699e-05	1.47051e-10	-0.000476229	0.000111024	1.79141e-05	0.0701785	0.000115999	8.58008e-05	0.176388	0.000122302	0.000112973	0.278999	0.173678
cg23740474	5	0.0197468	0.0059136	0.000840148	0.0204719	0.00783419	0.00897126	0.166803	0.000549405	0.000103938	1.25077e-07	0.000549405	0.000103938	1.25077e-07	0.540782	-0.000170212	0.000127429	0.181633	-0.000189795	0.000175541	0.279609	0.147242
cg07045857	6	0.00487999	0.00530898	0.357993	0.00487999	0.00530898	0.357993	0.502022	-0.000203576	9.34799e-05	0.0294247	-0.000203576	9.34799e-05	0.0294247	0.82881	0.000123053	0.00011327	0.277318	0.000123502	0.000115241	0.283862	0.402696
cg06895124	6	0.00940193	0.00364475	0.00989191	0.00940193	0.00364475	0.00989191	0.684149	9.30102e-05	6.40489e-05	0.146453	9.27057e-05	6.58314e-05	0.159063	0.39735	-8.39771e-05	7.84451e-05	0.284385	-8.39771e-05	7.84451e-05	0.284385	0.500909
cg01963618	6	0.00561513	0.00374006	0.133265	0.00561513	0.00374006	0.133265	0.744442	-6.67415e-05	6.59511e-05	0.311545	-6.67415e-05	6.59511e-05	0.311545	0.545953	8.66202e-05	8.10439e-05	0.285158	8.66202e-05	8.10439e-05	0.285158	0.556914
cg13552026	6	0.0163005	0.00441195	0.000220208	0.0163005	0.00441195	0.000220208	0.555751	-0.000578556	7.71355e-05	6.35632e-14	-0.000578556	7.71355e-05	6.35632e-14	0.828075	-0.000108599	9.51117e-05	0.253534	-0.000113724	0.000107072	0.288178	0.318303
cg07584563	6	0.00463831	0.00500746	0.3543	0.00463831	0.00500746	0.3543	0.917422	-0.000347291	8.75519e-05	7.28768e-05	-0.000347291	8.75519e-05	7.28768e-05	0.749171	0.00011402	0.000108081	0.291449	0.00011402	0.000108081	0.291449	0.870641
cg10435235	6	0.00330452	0.00388275	0.394726	0.00305361	0.00468663	0.514687	0.242442	-0.000158112	6.93731e-05	0.0226579	-0.000115983	0.00011791	0.325284	0.0443587	9.15871e-05	8.39062e-05	0.275035	9.22091e-05	8.74228e-05	0.29154	0.381251
cg13580477	6	0.00180815	0.00397737	0.64939	0.00229577	0.00461176	0.61862	0.289678	-0.000345508	7.023e-05	8.66915e-07	-0.000345508	7.023e-05	8.66915e-07	0.473525	0.000132832	8.61179e-05	0.122966	0.000116243	0.000110473	0.292691	0.203554
cg09803904	6	0.0017052	0.00427875	0.690242	-0.000176983	0.00708125	0.98006	0.0459167	4.17309e-05	7.44248e-05	0.574994	-1.90239e-05	0.000131157	0.884674	0.041405	0.000119797	9.13364e-05	0.189654	0.000162943	0.000154977	0.293074	0.0371336
cg24455634	5	0.00413138	0.00488697	0.397895	0.00414221	0.00534389	0.438263	0.328106	-7.11622e-05	8.66313e-05	0.411397	-7.11622e-05	8.66313e-05	0.411397	0.93385	0.000136006	0.000106182	0.200235	0.000131932	0.000125726	0.294011	0.263934
cg08352148	6	0.0102307	0.00357383	0.00420093	0.0102307	0.00357383	0.00420093	0.942745	-0.000100096	6.34323e-05	0.114565	-9.44756e-05	7.52983e-05	0.209593	0.290002	-8.16016e-05	7.77911e-05	0.294186	-8.16016e-05	7.77911e-05	0.294186	0.896692
cg16533767	6	0.00425656	0.00636437	0.503616	0.00425656	0.00636437	0.503616	0.828841	-0.000404568	0.000113183	0.000350943	-0.000404568	0.000113183	0.000350943	0.43789	0.000143689	0.000137216	0.295018	0.000143689	0.000137216	0.295018	0.859266
cg18432451	6	0.00354141	0.00360061	0.325333	0.00354141	0.00360061	0.325333	0.817791	-0.000570364	6.38987e-05	4.41457e-19	-0.000570364	6.38987e-05	4.41457e-19	0.762348	8.12343e-05	7.79619e-05	0.297424	8.12343e-05	7.79619e-05	0.297424	0.662214
cg14397171	6	0.00238145	0.00372676	0.522813	0.00238145	0.00372676	0.522813	0.945806	-0.00024827	6.56338e-05	0.000155163	-0.000257801	0.000108643	0.0176485	0.0555091	8.28676e-05	7.99819e-05	0.300165	8.28676e-05	7.99819e-05	0.300165	0.988204
cg00478884	6	-0.000218674	0.00497583	0.964946	0.000347428	0.00755113	0.963302	0.079659	-0.000241932	8.77004e-05	0.00580472	-0.0002712	0.000115177	0.0185406	0.21325	0.000171522	0.000106595	0.107595	0.000163841	0.000158364	0.300865	0.0930377
cg10811880	6	0.00317844	0.00400212	0.427085	0.00317844	0.00400212	0.427085	0.563108	-0.000136802	6.95163e-05	0.0490783	-0.000134955	7.13935e-05	0.0587182	0.396328	8.84802e-05	8.55973e-05	0.301286	8.84802e-05	8.55973e-05	0.301286	0.626284
cg13912027	6	0.00052199	0.00320428	0.870594	1.49526e-05	0.00369785	0.996774	0.303347	0.000340948	5.57328e-05	9.50253e-10	0.000314169	9.49373e-05	0.000935537	0.0561832	-0.000145704	6.85338e-05	0.033502	-0.000105405	0.00010218	0.30228	0.112285
cg10950593	6	0.00323333	0.00469971	0.491461	0.00323333	0.00469971	0.491461	0.712776	-6.13127e-06	8.22457e-05	0.940574	-4.0879e-05	0.000114469	0.721004	0.159226	0.000103524	0.000100359	0.302288	0.000103524	0.000100359	0.302288	0.4954
cg13828579	6	0.00516871	0.00405936	0.202918	0.00516871	0.00405936	0.202918	0.739697	-0.000352808	7.13603e-05	7.65227e-07	-0.000352808	7.13603e-05	7.65227e-07	0.602779	9.03876e-05	8.76867e-05	0.302634	9.03876e-05	8.76867e-05	0.302634	0.776715
cg16894819	6	0.00315946	0.0041012	0.441078	0.00315946	0.0041012	0.441078	0.573888	-0.000886381	7.16948e-05	4.13144e-35	-0.000886381	7.16948e-05	4.13144e-35	0.799919	9.04188e-05	8.77857e-05	0.303012	9.04188e-05	8.77857e-05	0.303012	0.42139
cg27592794	6	-0.00280426	0.00403223	0.486767	-0.00327749	0.00468166	0.483883	0.291781	0.000320675	7.00441e-05	4.69017e-06	0.000320675	7.00441e-05	4.69017e-06	0.495343	-0.00012111	8.61137e-05	0.159607	-0.000107635	0.000105004	0.305335	0.257928
cg24929847	6	0.00622055	0.00431747	0.149646	0.00622055	0.00431747	0.149646	0.731646	-5.35892e-05	7.5894e-05	0.480122	-5.35892e-05	7.5894e-05	0.480122	0.886478	9.49271e-05	9.29153e-05	0.306946	9.49271e-05	9.29153e-05	0.306946	0.73676
cg22107533	6	0.014723	0.00517799	0.00446369	0.014723	0.00517799	0.00446369	0.799686	-0.000604952	9.03967e-05	2.19844e-11	-0.000604952	9.03967e-05	2.19844e-11	0.874947	-0.000113498	0.000111407	0.308313	-0.000113498	0.000111407	0.308313	0.889095
cg12752325	6	0.00281152	0.00448768	0.53099	0.00281152	0.00448768	0.53099	0.588723	-0.000563869	7.95198e-05	1.33217e-12	-0.000563869	7.95198e-05	1.33217e-12	0.508139	9.872e-05	9.72088e-05	0.309846	9.872e-05	9.72088e-05	0.309846	0.454339
cg10067062	6	0.00500814	0.00333538	0.133221	0.00500814	0.00333538	0.133221	0.512914	-0.000658603	5.81275e-05	9.28725e-30	-0.000646049	9.03766e-05	8.77879e-13	0.10319	7.22512e-05	7.13273e-05	0.311083	7.22512e-05	7.13273e-05	0.311083	0.569492
cg21416544	6	0.00180277	0.00534919	0.736105	0.00179376	0.00670116	0.788946	0.230064	-0.000154453	9.28333e-05	0.0961594	-0.000184382	0.00011955	0.122999	0.228389	0.000157266	0.000114185	0.16842	0.000161071	0.000159018	0.311102	0.147999
cg03370951	6	-0.00038562	0.00314654	0.902461	-0.00050833	0.00384228	0.894748	0.272108	0.000108134	5.39794e-05	0.0451501	8.95153e-05	9.69127e-05	0.355659	0.0469842	-9.97273e-05	6.63574e-05	0.132869	-8.97056e-05	8.90781e-05	0.313914	0.207122
cg23507834	5	0.00378692	0.00406277	0.351283	0.00378692	0.00406277	0.351283	0.624616	-0.000291435	7.24477e-05	5.75354e-05	-0.00029642	8.46997e-05	0.000465852	0.290169	8.8802e-05	8.82073e-05	0.314059	8.8802e-05	8.82073e-05	0.314059	0.678403
cg00415971	6	0.00611382	0.00473985	0.197094	0.00611382	0.00473985	0.197094	0.825853	-0.000110477	8.3643e-05	0.186561	-0.000110477	8.3643e-05	0.186561	0.952573	0.000103493	0.000103023	0.315108	0.000103493	0.000103023	0.315108	0.495571
cg04211018	6	0.0100789	0.0035401	0.0044125	0.0126787	0.00618079	0.040237	0.0240115	-0.000201077	6.23296e-05	0.00125522	-0.000216353	7.4435e-05	0.00365377	0.279403	-7.77807e-05	7.62421e-05	0.307643	-0.000135017	0.000134871	0.316786	0.0223624
cg00519884	6	-0.000427644	0.0031948	0.893516	-0.0014275	0.00622931	0.818745	0.00619355	-0.000334323	5.65984e-05	3.48549e-09	-0.000357618	0.000100094	0.000353162	0.0321926	0.000131276	6.92957e-05	0.0581685	0.000140783	0.000140635	0.3168	0.00381838
cg02338965	6	0.00332582	0.00442331	0.45212	0.00332582	0.00442331	0.45212	0.90153	-0.00030142	7.82684e-05	0.000117584	-0.00030142	7.82684e-05	0.000117584	0.645021	9.56077e-05	9.56159e-05	0.317352	9.56077e-05	9.56159e-05	0.317352	0.719576
cg22482700	6	0.0120003	0.00421805	0.0044414	0.0141281	0.00798887	0.0769826	0.00966763	-0.000255991	7.43349e-05	0.000573703	-0.000316795	0.000138069	0.0217635	0.0217785	-0.00011124	9.05717e-05	0.219372	-0.000165982	0.000166076	0.317583	0.0145953
cg27235662	6	0.00351031	0.00428239	0.412382	0.0031757	0.00531217	0.549962	0.222034	-0.000413496	7.51288e-05	3.71648e-08	-0.000414839	7.91691e-05	1.60652e-07	0.377091	0.000114658	9.1655e-05	0.210944	0.00011078	0.000110881	0.31775	0.248359
cg13252206	6	0.00396486	0.00467208	0.396087	0.00396486	0.00467208	0.396087	0.831619	-0.000825999	8.22368e-05	9.74877e-24	-0.000825999	8.22368e-05	9.74877e-24	0.713463	9.9644e-05	0.000100214	0.320069	9.9644e-05	0.000100214	0.320069	0.80631
cg01714756	6	0.00323747	0.00391765	0.408589	0.00323747	0.00391765	0.408589	0.476791	-0.000186054	6.90145e-05	0.00702053	-0.000177643	9.23812e-05	0.0544888	0.189697	8.47704e-05	8.40969e-05	0.31345	8.87099e-05	8.93258e-05	0.320659	0.365889
cg19420930	6	0.00506661	0.00445353	0.255262	0.00506661	0.00445353	0.255262	0.677747	-0.000157476	7.86186e-05	0.0451731	-0.000157476	7.86186e-05	0.0451731	0.984092	9.57149e-05	9.64008e-05	0.320766	9.57149e-05	9.64008e-05	0.320766	0.634821
cg05355301	6	0.00322836	0.00491826	0.511564	0.00322836	0.00491826	0.511564	0.500688	-0.00011545	8.62565e-05	0.180751	-0.000132857	0.000110274	0.228286	0.227539	0.000104833	0.000105642	0.321031	0.000104833	0.000105642	0.321031	0.545286
cg01065586	6	0.000469156	0.0037527	0.900509	-0.000484427	0.00632272	0.938928	0.0430013	0.000218075	6.49906e-05	0.000792242	0.000214358	0.000103616	0.0385672	0.0841093	-0.000162464	8.05093e-05	0.0435964	-0.000135373	0.000136474	0.321231	0.046615
cg17665505	6	0.0042501	0.00353912	0.229793	0.0042501	0.00353912	0.229793	0.497532	-9.52075e-05	6.25347e-05	0.12789	-8.78505e-05	7.64834e-05	0.250712	0.260376	7.54065e-05	7.61176e-05	0.321853	7.54065e-05	7.61176e-05	0.321853	0.730033
cg10630880	5	0.0101348	0.00398848	0.0110534	0.0101348	0.00398848	0.0110534	0.950006	-0.000697141	6.84261e-05	2.23809e-24	-0.000699476	7.09145e-05	5.98264e-23	0.384395	-8.46248e-05	8.55902e-05	0.3228	-8.46248e-05	8.55902e-05	0.3228	0.944362
cg15743907	6	0.00300041	0.00536529	0.576007	0.00321264	0.00707127	0.649597	0.171028	-0.00032823	9.61193e-05	0.000638249	-0.000293633	0.000142524	0.0393762	0.121732	0.000144116	0.000116297	0.215269	0.000143566	0.000145232	0.322892	0.221856
cg14266248	6	0.00345173	0.00361688	0.339911	0.00345173	0.00361688	0.339911	0.817109	0.000338337	6.47009e-05	1.702e-07	0.000338337	6.47009e-05	1.702e-07	0.969799	7.71867e-05	7.81503e-05	0.323314	7.71867e-05	7.81503e-05	0.323314	0.732989
cg05766107	6	0.0101876	0.00350423	0.00364644	0.0130314	0.00652501	0.0458099	0.0154968	-0.000536992	6.12175e-05	1.75703e-18	-0.000536992	6.12175e-05	1.75703e-18	0.466822	-5.67931e-05	7.53541e-05	0.45104	-0.000149363	0.000151656	0.324682	0.00649535
cg19503640	6	-0.00424599	0.00568291	0.454973	-0.00424599	0.00568291	0.454973	0.574978	0.000609853	9.97357e-05	9.67473e-10	0.000609853	9.97357e-05	9.67473e-10	0.470399	-0.000119603	0.000122139	0.327462	-0.000119603	0.000122139	0.327462	0.805457
cg09807875	6	0.00271438	0.00472699	0.565812	0.000722608	0.00720342	0.920095	0.0739728	-0.000247825	8.32787e-05	0.00292183	-0.000226408	0.000134994	0.0935107	0.0660099	0.000118973	0.000101825	0.242643	0.000151621	0.000154948	0.327815	0.0772378
cg03369432	6	-0.00100512	0.00428424	0.814513	-0.000624243	0.00747499	0.933445	0.0270952	-0.000136641	7.45857e-05	0.0669504	-2.98273e-05	0.000167429	0.858606	0.00170629	0.000171339	9.18079e-05	0.0620024	0.000160664	0.000164475	0.328655	0.0218542
cg17819085	6	0.00380326	0.00379257	0.315948	0.00361212	0.0044827	0.420363	0.272545	-5.19537e-06	6.66444e-05	0.937863	-5.94237e-05	0.000132228	0.653142	0.0116758	0.00010578	8.15857e-05	0.194786	0.000104714	0.00010726	0.328931	0.190153
cg06567920	6	0.0030172	0.00477724	0.527663	0.00288188	0.00507554	0.570172	0.36674	-0.000246445	8.40407e-05	0.00336302	-0.000246445	8.40407e-05	0.00336302	0.68	0.000118532	0.000103217	0.250811	0.00012633	0.000129409	0.328964	0.227253
cg10866062	6	0.0163293	0.00539423	0.00246849	0.016937	0.00927252	0.0677621	0.0326644	-0.000635823	9.48997e-05	2.08493e-11	-0.000623597	0.000112717	3.1582e-08	0.289366	-0.000159655	0.000116256	0.169656	-0.000202796	0.000207855	0.329232	0.0227712
cg12624721	6	0.00041872	0.00252052	0.868059	0.00034431	0.00464931	0.940966	0.0154556	-0.000275469	4.47462e-05	7.44888e-10	-0.000275469	4.47462e-05	7.44888e-10	0.417417	0.000100557	5.43555e-05	0.0643148	9.53351e-05	9.80118e-05	0.330707	0.023062
cg11855943	5	0.0138166	0.00433626	0.00144106	0.0146869	0.00596602	0.0138258	0.121805	9.98367e-06	7.82576e-05	0.898486	9.98367e-06	7.82576e-05	0.898486	0.917101	-9.90857e-05	9.47419e-05	0.295631	-0.00014211	0.000146117	0.330763	0.0646006
cg14784922	6	0.001391	0.00400485	0.728345	0.000296689	0.00613025	0.961399	0.0749434	-0.00018774	7.04767e-05	0.00772489	-0.000229912	0.000125888	0.0678012	0.0305806	0.000121432	8.6215e-05	0.158988	0.000140941	0.000145383	0.332322	0.0355734
cg06398881	6	0.000949253	0.00336935	0.778149	0.000999463	0.0035127	0.776006	0.381766	-0.000334202	5.86556e-05	1.21426e-08	-0.000335046	6.19896e-05	6.48555e-08	0.376379	0.000100674	7.19504e-05	0.161749	8.97503e-05	9.26651e-05	0.332773	0.201206
cg11204680	6	0.00221783	0.0038951	0.569091	0.00221783	0.0038951	0.569091	0.608699	-0.000181474	6.80372e-05	0.00764702	-0.000187207	0.000101062	0.0639678	0.115496	8.10174e-05	8.36802e-05	0.332955	8.10174e-05	8.36802e-05	0.332955	0.60366
cg14220329	6	-0.00384422	0.00335637	0.252063	-0.00189565	0.00489838	0.69876	0.121926	-5.08741e-05	5.78829e-05	0.379448	-5.08741e-05	5.78829e-05	0.379448	0.440914	0.000192742	7.15803e-05	0.00708822	0.000120367	0.000124377	0.333166	0.0378567
cg04816013	6	0.0141156	0.00405934	0.00050647	0.0141156	0.00405934	0.00050647	0.493352	-0.000345196	7.11469e-05	1.223e-06	-0.000345196	7.11469e-05	1.223e-06	0.968442	-8.4029e-05	8.6856e-05	0.333318	-8.4029e-05	8.6856e-05	0.333318	0.556108
cg16284238	6	0.0013838	0.00466716	0.76685	0.00108883	0.00558708	0.845484	0.261804	-0.000210132	8.22513e-05	0.0106261	-0.000215082	0.000119955	0.0729682	0.131443	0.000137618	0.000100659	0.171574	0.000134887	0.000139811	0.334655	0.142651
cg20872809	6	0.00341587	0.00435323	0.432644	0.00341587	0.00435323	0.432644	0.897834	-0.000580167	7.79158e-05	9.61547e-14	-0.000613057	0.00010554	6.29297e-09	0.176322	9.12035e-05	9.46935e-05	0.335475	9.12035e-05	9.46935e-05	0.335475	0.96996
cg20902975	6	0.00465818	0.00500468	0.351975	0.00465818	0.00500468	0.351975	0.947783	-0.000199541	8.82216e-05	0.0237086	-0.000199541	8.82216e-05	0.0237086	0.763314	0.000104224	0.000108256	0.335672	0.000104224	0.000108256	0.335672	0.904015
cg22677100	5	0.00342845	0.00438184	0.433965	0.00342845	0.00438184	0.433965	0.696925	-0.00042947	7.72063e-05	2.65739e-08	-0.00042947	7.72063e-05	2.65739e-08	0.964737	9.11513e-05	9.5199e-05	0.338324	9.11513e-05	9.5199e-05	0.338324	0.706429
cg16035633	6	0.00410792	0.0035694	0.249785	0.000933928	0.0065477	0.886579	0.019911	-0.000478993	6.17934e-05	9.08016e-15	-0.000482643	8.22296e-05	4.37214e-09	0.204584	6.64165e-05	7.62909e-05	0.38399	0.000121884	0.000128314	0.342168	0.0468132
cg20448706	6	0.0164809	0.00462994	0.000371379	0.0148809	0.00630622	0.0182886	0.156326	-0.000178969	8.17535e-05	0.0285878	-0.00017904	8.18073e-05	0.0286289	0.415461	-0.000170383	9.97652e-05	0.0876652	-0.000136096	0.000143662	0.343469	0.125561
cg05757757	6	-0.0123037	0.00437289	0.00489871	-0.0123037	0.00437289	0.00489871	0.824145	-0.000625058	7.60598e-05	2.06952e-16	-0.000625058	7.60598e-05	2.06952e-16	0.73848	8.80956e-05	9.32313e-05	0.344703	8.80956e-05	9.32313e-05	0.344703	0.804019
cg09183316	6	-0.0104743	0.00363131	0.00392101	-0.0104749	0.0036319	0.00392497	0.415769	7.28361e-05	6.27362e-05	0.245646	7.53967e-05	0.000102341	0.461292	0.0799195	7.25912e-05	7.68945e-05	0.345151	7.25912e-05	7.68945e-05	0.345151	0.425868
cg16322565	6	0.00329455	0.00522211	0.528115	0.00329455	0.00522211	0.528115	0.448731	0.000173403	9.18399e-05	0.0590124	0.000121611	0.000138656	0.38045	0.104087	0.000121979	0.000111701	0.27483	0.000120823	0.000128104	0.345595	0.29762
cg00232483	6	0.0101726	0.00400554	0.0110968	0.011216	0.00582326	0.0540968	0.101487	0.000169341	7.14397e-05	0.0177684	0.000169341	7.14397e-05	0.0177684	0.852356	-8.75504e-05	8.60917e-05	0.30918	-0.000121602	0.000129106	0.346253	0.0859296
cg08797423	6	0.0049129	0.00361809	0.174505	0.0049129	0.00361809	0.174505	0.498479	-0.000528563	6.3628e-05	9.80835e-17	-0.000528563	6.3628e-05	9.80835e-17	0.921807	8.61595e-05	7.73021e-05	0.265029	8.05935e-05	8.56543e-05	0.346748	0.328452
cg22294181	6	0.00705163	0.00397341	0.0759466	0.00705163	0.00397341	0.0759466	0.74044	-0.000171637	6.91807e-05	0.0131015	-0.000171637	6.91807e-05	0.0131015	0.98803	7.98183e-05	8.49197e-05	0.347255	7.98183e-05	8.49197e-05	0.347255	0.615754
cg05637351	6	0.000539211	0.00178213	0.762221	0.000446209	0.0026564	0.866603	0.119129	8.82465e-05	3.0542e-05	0.00386042	8.75062e-05	3.73278e-05	0.0190647	0.289253	-6.53714e-05	3.76619e-05	0.0826095	-5.87115e-05	6.25343e-05	0.347799	0.0660051
cg03357721	6	0.00943096	0.00392144	0.0161735	0.00943096	0.00392144	0.0161735	0.851212	-2.47711e-05	6.82699e-05	0.716724	-2.47711e-05	6.82699e-05	0.716724	0.576238	-7.8575e-05	8.38146e-05	0.348509	-7.8575e-05	8.38146e-05	0.348509	0.818745
cg08765811	6	0.00282692	0.00413665	0.494364	0.00168334	0.00633674	0.790511	0.0811044	-0.000517252	7.2146e-05	7.52662e-13	-0.000564473	0.000130907	1.61764e-05	0.0308093	0.000101334	8.87947e-05	0.253778	0.00013073	0.000139458	0.348544	0.0731054
cg14947846	6	0.000741186	0.0041145	0.857042	0.00154221	0.00560454	0.783185	0.149014	-0.000285354	7.29877e-05	9.24412e-05	-0.000213881	0.000115956	0.0651114	0.0774872	0.000187494	8.78919e-05	0.0329053	0.000138141	0.000147438	0.348786	0.0369462
cg27250032	6	0.00474608	0.00631699	0.45246	0.00474608	0.00631699	0.45246	0.617214	-8.44642e-05	0.000112732	0.453706	-8.44642e-05	0.000112732	0.453706	0.707838	0.000127806	0.00013645	0.348936	0.000127806	0.00013645	0.348936	0.514736
cg12762413	6	0.0123679	0.00418468	0.00312136	0.0123679	0.00418468	0.00312136	0.873766	-0.000294395	7.2622e-05	5.03941e-05	-0.000294395	7.2622e-05	5.03941e-05	0.862395	-8.31814e-05	8.91888e-05	0.351004	-8.31814e-05	8.91888e-05	0.351004	0.717244
cg23877683	6	0.00883995	0.00360824	0.0142882	0.00883995	0.00360824	0.0142882	0.523283	0.000109398	6.30448e-05	0.0826985	0.000133929	8.89604e-05	0.132198	0.159522	-7.22953e-05	7.75183e-05	0.351015	-7.22953e-05	7.75183e-05	0.351015	0.68135
cg08702879	6	0.00280496	0.00475008	0.554851	0.00280496	0.00475008	0.554851	0.72977	-0.000261506	8.24831e-05	0.00152219	-0.000261506	8.24831e-05	0.00152219	0.622285	9.51751e-05	0.000102147	0.351466	9.51751e-05	0.000102147	0.351466	0.710854
cg16609995	6	0.0102243	0.00405244	0.0116358	0.0102243	0.00405244	0.0116358	0.761428	-0.000148217	7.1204e-05	0.0373811	-0.000148217	7.1204e-05	0.0373811	0.634629	-8.0853e-05	8.68886e-05	0.352093	-8.0853e-05	8.68886e-05	0.352093	0.517996
cg26325867	6	0.0105682	0.00379795	0.00539224	0.0105682	0.00379795	0.00539224	0.922414	-0.00115171	6.59446e-05	2.6567e-68	-0.00115171	6.59446e-05	2.6567e-68	0.939962	-7.56423e-05	8.15837e-05	0.353836	-7.56423e-05	8.15837e-05	0.353836	0.925497
cg01899581	6	-0.0150972	0.00508808	0.00300552	-0.016599	0.0084951	0.0507069	0.0428238	-0.000141543	8.89803e-05	0.111673	-0.000141543	8.89803e-05	0.111673	0.815271	0.000125101	0.000109481	0.253173	0.000160197	0.000172799	0.353889	0.0684277
cg00593111	6	0.00450754	0.00403594	0.264059	0.00450754	0.00403594	0.264059	0.912996	-0.000295289	7.15966e-05	3.71798e-05	-0.000295289	7.15966e-05	3.71798e-05	0.978602	8.02008e-05	8.66449e-05	0.35464	8.02008e-05	8.66449e-05	0.35464	0.830849
cg06174704	6	0.00153328	0.00310433	0.621365	0.00153328	0.00310433	0.621365	0.643451	-0.000437356	5.41089e-05	6.32565e-16	-0.000437356	5.41089e-05	6.32565e-16	0.930621	8.43331e-05	6.63336e-05	0.203605	7.30322e-05	7.8932e-05	0.354833	0.280722
cg06469895	6	0.00152314	0.004504	0.735231	0.00151915	0.00459185	0.740768	0.399472	-7.18994e-05	7.95283e-05	0.365956	-0.000155615	0.000133103	0.24235	0.0522463	0.000119101	9.66955e-05	0.218058	0.000113915	0.00012331	0.355586	0.202666
cg08080174	6	0.00452633	0.00454647	0.319459	0.00585869	0.00618877	0.34381	0.155706	-0.000191992	8.0047e-05	0.0164626	-0.000191992	8.0047e-05	0.0164626	0.608126	0.000150758	9.80865e-05	0.124296	0.000115379	0.000125061	0.356224	0.213415
cg15358723	6	0.0047556	0.00467256	0.308786	0.0047556	0.00467256	0.308786	0.759985	-0.000332465	8.23376e-05	5.39491e-05	-0.000354156	0.000110583	0.00136185	0.181275	0.000105543	9.99888e-05	0.291173	9.94486e-05	0.000108112	0.357643	0.34924
cg01833890	6	0.00718443	0.00263692	0.00643883	0.00787244	0.00324335	0.0152135	0.248344	2.01013e-05	4.60232e-05	0.662282	1.79568e-05	5.33481e-05	0.736421	0.31295	-4.5924e-05	5.65063e-05	0.416377	-6.80073e-05	7.40524e-05	0.358427	0.203584
cg14584535	6	-0.0116559	0.00464893	0.0121682	-0.0116559	0.00464893	0.0121682	0.957503	-0.000159717	8.15399e-05	0.0501403	-0.000159717	8.15399e-05	0.0501403	0.637185	9.10701e-05	9.93667e-05	0.359402	9.10701e-05	9.93667e-05	0.359402	0.936834
cg05352668	5	0.000167412	0.00311164	0.957093	0.000675294	0.00436545	0.877065	0.11959	-0.000409568	5.54138e-05	1.45633e-13	-0.000407247	5.80831e-05	2.35866e-12	0.371061	0.000122021	6.77511e-05	0.0717	9.85918e-05	0.00010771	0.36001	0.0602157
cg04414860	6	-0.0054583	0.00528215	0.301441	-0.0054583	0.00528215	0.301441	0.555119	-0.000475826	9.26521e-05	2.8122e-07	-0.000475826	9.26521e-05	2.8122e-07	0.563821	-0.000103548	0.000113125	0.360011	-0.000103548	0.000113125	0.360011	0.662565
cg05102552	6	-0.00320588	0.00551745	0.561211	-0.00320588	0.00551745	0.561211	0.839862	0.000253224	9.57163e-05	0.00815529	0.000250549	9.90647e-05	0.0114342	0.392454	-0.00010802	0.000118083	0.360309	-0.00010802	0.000118083	0.360309	0.843152
cg02385153	6	0.00415065	0.00347832	0.232755	0.00318155	0.00456541	0.485877	0.18598	-0.000399281	6.12556e-05	7.1122e-11	-0.000399281	6.12556e-05	7.1122e-11	0.426372	7.27965e-05	7.50175e-05	0.33185	8.27469e-05	9.05117e-05	0.360606	0.264707
cg06566384	6	-0.00807931	0.00331436	0.0147824	-0.00807931	0.00331436	0.0147824	0.664799	6.64339e-05	5.78895e-05	0.251134	0.000123091	0.000104847	0.240394	0.0288322	6.45476e-05	7.07207e-05	0.361394	6.45476e-05	7.07207e-05	0.361394	0.728718
cg18519834	6	0.00156503	0.00424321	0.712253	0.00154249	0.00513285	0.763786	0.247111	-5.52122e-05	7.55413e-05	0.464847	-5.52122e-05	7.55413e-05	0.464847	0.446027	0.000113053	9.21441e-05	0.219856	0.000114211	0.00012542	0.362492	0.15653
cg02918910	6	-0.00121771	0.00236469	0.606585	-0.00102446	0.00270164	0.70454	0.308543	0.000276922	4.21329e-05	4.94461e-11	0.000317123	7.50154e-05	2.36362e-05	0.0460206	-5.37151e-05	5.14991e-05	0.296935	-5.90939e-05	6.49026e-05	0.362558	0.236967
cg24632873	6	0.00495495	0.00446567	0.267187	0.00495495	0.00446567	0.267187	0.588843	-0.000616234	7.84366e-05	3.95117e-15	-0.000607363	0.000126083	1.45614e-06	0.0635771	9.82347e-05	9.63829e-05	0.308102	9.40061e-05	0.000103419	0.363357	0.353887
cg18885766	6	0.0151448	0.00548837	0.00579033	0.0151448	0.00548837	0.00579033	0.440328	-0.000552716	9.67607e-05	1.11527e-08	-0.000552716	9.67607e-05	1.11527e-08	0.789744	-0.000107383	0.000118576	0.365141	-0.000107383	0.000118576	0.365141	0.607535
cg18967021	6	0.00410472	0.00404555	0.310285	0.00410472	0.00404555	0.310285	0.571738	-9.66845e-05	7.09366e-05	0.172892	-9.66845e-05	7.09366e-05	0.172892	0.919785	7.82952e-05	8.65216e-05	0.365507	7.82952e-05	8.65216e-05	0.365507	0.726666
cg19520280	6	0.00154848	0.00490587	0.752278	0.00280262	0.00740482	0.70507	0.073167	-0.000600078	8.85092e-05	1.20306e-11	-0.000600078	8.85092e-05	1.20306e-11	0.480301	0.000158367	0.000106933	0.138607	0.000131716	0.000146248	0.367782	0.141604
cg18336453	6	0.00214547	0.0042794	0.616126	0.0023078	0.00601973	0.701444	0.128443	-0.000441642	7.48556e-05	3.63687e-09	-0.000483877	0.00012712	0.000140977	0.0488229	0.000143248	9.20315e-05	0.119586	0.000122625	0.000136223	0.368024	0.09863
cg09868768	6	0.00188476	0.00515019	0.714395	0.00422387	0.00712132	0.553094	0.139289	0.000195938	8.99821e-05	0.029442	0.000193376	0.000114928	0.0924555	0.2292	0.000174215	0.000109937	0.113041	0.000136158	0.000151333	0.368268	0.148432
cg13357714	6	0.00265819	0.0047316	0.574256	0.00266798	0.00475146	0.574451	0.412481	-0.000925652	8.31825e-05	9.17073e-29	-0.000925652	8.31825e-05	9.17073e-29	0.622452	0.000113905	0.000102402	0.265993	0.000103234	0.000114894	0.368914	0.321764
cg06966839	6	0.0066613	0.00286884	0.0202356	0.00714153	0.00320544	0.0258843	0.331851	-6.71954e-05	4.94882e-05	0.174525	-6.71954e-05	4.94882e-05	0.174525	0.41823	-4.41324e-05	6.07384e-05	0.467472	-7.01553e-05	7.82414e-05	0.369905	0.223214
cg27176729	6	-0.00533537	0.00621829	0.390886	-0.00631498	0.00739349	0.393035	0.273396	0.000468923	0.000108173	1.45793e-05	0.000464975	0.00012363	0.00016922	0.323176	-0.000205007	0.000132932	0.123026	-0.000159369	0.00017823	0.371229	0.182507
cg24662614	5	0.000483068	0.00351743	0.890766	0.0011606	0.00494178	0.814321	0.121213	-0.000269306	6.23046e-05	1.54336e-05	-0.000269306	6.23046e-05	1.54336e-05	0.840243	0.00012835	7.64366e-05	0.0931186	0.000101436	0.000113877	0.373062	0.0992034
cg25308381	6	0.00411463	0.00412918	0.319018	0.00482236	0.0058576	0.410357	0.118406	-0.000298467	7.25508e-05	3.8904e-05	-0.000298467	7.25508e-05	3.8904e-05	0.692842	0.000112821	8.88093e-05	0.203952	0.00010149	0.000114545	0.375605	0.196748
cg13924998	6	-0.00195489	0.00459365	0.670426	-0.000557093	0.00757033	0.941337	0.0414884	3.88698e-05	8.03054e-05	0.628368	2.38721e-05	9.78901e-05	0.807334	0.266512	0.000184238	9.83401e-05	0.0610019	0.000140521	0.000159427	0.378094	0.0501938
cg17644208	6	0.00952331	0.00288111	0.000948319	0.00889657	0.00413708	0.03152	0.132961	-0.000122443	4.9998e-05	0.0143273	-0.000122443	4.9998e-05	0.0143273	0.719364	-9.16979e-05	6.1247e-05	0.134346	-7.47089e-05	8.49501e-05	0.379161	0.167216
cg07435275	5	0.0115347	0.00421305	0.00618427	0.0115347	0.00421305	0.00618427	0.686913	-0.000170965	7.45463e-05	0.0218247	-0.000170965	7.45463e-05	0.0218247	0.72137	-7.99541e-05	9.18292e-05	0.383927	-8.25226e-05	9.39753e-05	0.379872	0.387591
cg26123647	6	0.00523348	0.00528722	0.322255	0.00523348	0.00528722	0.322255	0.985488	-0.000671965	9.31284e-05	5.375e-13	-0.000675925	0.000121601	2.72037e-08	0.219523	9.93778e-05	0.000113532	0.381396	9.93778e-05	0.000113532	0.381396	0.889815
cg07349899	6	0.000676292	0.00332503	0.838827	0.00125539	0.00386294	0.745195	0.283524	-0.000182541	5.86631e-05	0.00186021	-0.000182541	5.86631e-05	0.00186021	0.537223	0.000104362	7.17335e-05	0.145708	8.19552e-05	9.36835e-05	0.381678	0.188618
cg24870828	6	0.00302633	0.00430665	0.482237	0.00302633	0.00430665	0.482237	0.430706	-6.79848e-05	7.43441e-05	0.360475	-6.79848e-05	7.43441e-05	0.360475	0.997862	7.96522e-05	9.13394e-05	0.383183	7.96522e-05	9.13394e-05	0.383183	0.484044
cg11828203	6	0.00962768	0.0032301	0.00287671	0.00997749	0.00476227	0.036161	0.111568	-0.00035408	5.56714e-05	2.01513e-10	-0.00035408	5.56714e-05	2.01513e-10	0.996034	-6.84211e-05	6.89445e-05	0.320998	-8.23975e-05	9.46392e-05	0.383946	0.16721
cg26861995	6	0.0112296	0.00392061	0.00418017	0.0112296	0.00392061	0.00418017	0.465122	0.000134285	6.7811e-05	0.0476712	0.000134285	6.7811e-05	0.0476712	0.70445	-7.27769e-05	8.3738e-05	0.384791	-7.27769e-05	8.3738e-05	0.384791	0.699259
cg18337222	6	-0.00952426	0.00393962	0.015625	-0.0113322	0.00526972	0.031521	0.165746	0.000545978	7.01218e-05	6.90906e-15	0.000539965	7.63205e-05	1.49482e-12	0.358112	4.05272e-05	8.50184e-05	0.633585	0.000111804	0.000128864	0.385605	0.0884241
cg23214764	6	-0.00114734	0.0031793	0.71819	-0.0013384	0.00345629	0.698581	0.361429	0.000133771	5.4228e-05	0.0136314	0.000141366	6.88384e-05	0.0400151	0.263438	-9.52415e-05	6.68621e-05	0.154317	-7.59012e-05	8.77526e-05	0.387069	0.22737
cg15398255	6	0.00263333	0.00287944	0.360439	0.00263333	0.00287944	0.360439	0.466089	-0.000205089	5.06886e-05	5.20892e-05	-0.000205089	5.06886e-05	5.20892e-05	0.854443	5.31155e-05	6.14866e-05	0.387667	5.31155e-05	6.14866e-05	0.387667	0.476613
cg17083429	6	-0.0190195	0.00717434	0.00802426	-0.0192278	0.00766593	0.0121342	0.359341	0.000345321	0.000126393	0.00629274	0.000345321	0.000126393	0.00629274	0.585211	0.000133312	0.00015435	0.387753	0.000133312	0.00015435	0.387753	0.449743
cg17478992	6	0.00309948	0.00427278	0.468206	0.00203591	0.00588531	0.729395	0.145905	-6.06245e-05	7.48055e-05	0.417694	-9.9428e-05	0.000114457	0.385013	0.103064	9.8674e-05	9.16362e-05	0.281569	0.000109549	0.000127174	0.389012	0.148958
cg08347373	6	-0.0134447	0.00534839	0.0119443	-0.0134447	0.00534839	0.0119443	0.785206	-0.000286631	9.36782e-05	0.00221529	-0.000286631	9.36782e-05	0.00221529	0.609172	9.84295e-05	0.000114428	0.389686	9.84295e-05	0.000114428	0.389686	0.858409
cg04575427	6	-0.00185796	0.0041835	0.656959	0.000164613	0.00668612	0.980358	0.0525331	-0.000304171	7.4068e-05	4.01435e-05	-0.000265943	0.000134598	0.0481732	0.0264974	0.000219311	9.05072e-05	0.0153873	0.000140357	0.000164281	0.3929	0.0168291
cg24285903	6	0.0070739	0.00420216	0.0922987	0.0070739	0.00420216	0.0922987	0.524534	-0.000233452	7.34171e-05	0.00147374	-0.000231264	9.442e-05	0.0143131	0.222819	7.70174e-05	9.01919e-05	0.393145	7.70174e-05	9.01919e-05	0.393145	0.647972
cg11116300	6	0.0107616	0.00376525	0.00426144	0.0156029	0.00775577	0.0442432	0.00244108	-0.000235161	6.72293e-05	0.000468943	-0.000227702	8.92569e-05	0.0107389	0.197769	-2.95362e-05	8.12814e-05	0.716319	-0.000148706	0.000174392	0.393821	0.0012437
cg15748555	5	0.000541402	0.00314443	0.863297	0.00142848	0.00433454	0.741735	0.153747	-0.00047614	5.46409e-05	2.93411e-18	-0.00047614	5.46409e-05	2.93411e-18	0.689547	0.000107152	6.7731e-05	0.113643	8.41085e-05	9.87637e-05	0.394429	0.133713
cg17820039	6	0.00564549	0.00320298	0.0779726	0.0104052	0.00587394	0.0764915	0.017991	9.90075e-05	5.58253e-05	0.0761419	0.000109354	7.71804e-05	0.156524	0.181329	7.30255e-07	6.85256e-05	0.991497	-0.000109155	0.000128239	0.394667	0.0151159
cg09501025	6	0.00293262	0.00445921	0.51076	0.00293262	0.00445921	0.51076	0.495079	-0.000462648	7.68782e-05	1.7665e-09	-0.000462648	7.68782e-05	1.7665e-09	0.461352	8.13237e-05	9.55891e-05	0.394901	8.14124e-05	9.5714e-05	0.395003	0.414946
cg11463271	6	-0.00289312	0.00468451	0.536845	-0.00205314	0.00644035	0.749883	0.160643	0.000573581	8.12274e-05	1.64806e-12	0.000594797	0.000115152	2.40036e-07	0.168313	-0.000113482	9.96373e-05	0.254723	-0.000140615	0.000165401	0.395243	0.0539292
cg23629393	6	0.00520682	0.00350272	0.137145	0.00520682	0.00350272	0.137145	0.4395	-0.000338869	6.20976e-05	4.8414e-08	-0.000339807	6.34504e-05	8.53292e-08	0.400547	6.44732e-05	7.58494e-05	0.395316	6.44732e-05	7.58494e-05	0.395316	0.444084
cg15924285	6	0.00470272	0.00521209	0.366913	0.00470272	0.00521209	0.366913	0.926868	6.37569e-05	9.12717e-05	0.48484	7.19643e-05	0.000115133	0.531935	0.233545	9.51899e-05	0.000112067	0.395656	9.51899e-05	0.000112067	0.395656	0.928864
cg20306694	6	0.00485664	0.00583374	0.405122	0.00485664	0.00583374	0.405122	0.590986	-6.57558e-05	0.000103575	0.525521	-0.000107495	0.000186135	0.563593	0.0274951	0.000105967	0.000124972	0.396482	0.000105967	0.000124972	0.396482	0.496772
cg15045153	6	0.0056717	0.0046588	0.223445	0.00627457	0.00687867	0.361675	0.0870474	-0.000225782	8.22096e-05	0.00602496	-0.000198795	0.00012114	0.10079	0.113533	0.000139469	0.000100126	0.163638	0.000123472	0.000146172	0.398275	0.0970672
cg18016128	6	0.00219552	0.00365695	0.54826	0.00323866	0.00501178	0.518143	0.147795	0.000198945	6.40925e-05	0.00190906	0.000214169	7.96275e-05	0.00715296	0.246077	0.000118744	7.89632e-05	0.132636	9.36983e-05	0.000111078	0.398929	0.133334
cg26962618	6	-0.0175942	0.00587023	0.00272477	-0.0184964	0.00778542	0.0175125	0.171579	-0.000350854	0.00010267	0.000632474	-0.000344524	0.000166053	0.0380065	0.0689466	0.000124283	0.000125241	0.321025	0.000162131	0.000193441	0.401951	0.0732118
cg17062268	6	0.00614741	0.00340154	0.0707245	0.00614741	0.00340154	0.0707245	0.799297	-0.000411522	5.97882e-05	5.86048e-12	-0.000411522	5.97882e-05	5.86048e-12	0.837101	6.12378e-05	7.31796e-05	0.402697	6.12378e-05	7.31796e-05	0.402697	0.530186
cg09417176	6	0.00277097	0.00410076	0.499217	0.00277097	0.00410076	0.499217	0.838094	-0.000377519	7.30976e-05	2.40962e-07	-0.000377519	7.30976e-05	2.40962e-07	0.581669	7.40714e-05	8.86002e-05	0.403145	7.40714e-05	8.86002e-05	0.403145	0.587114
cg13590277	6	0.0115117	0.00314579	0.000252809	0.0112899	0.00538782	0.0361318	0.0337704	-0.000269563	5.50657e-05	9.81535e-07	-0.000269563	5.50657e-05	9.81535e-07	0.947386	-9.99614e-05	6.762e-05	0.139333	-0.000106024	0.000127263	0.404786	0.0138778
cg09930046	6	0.00242328	0.00303783	0.425044	0.00242328	0.00303783	0.425044	0.492664	-0.000270029	5.26968e-05	2.98802e-07	-0.000270029	5.26968e-05	2.98802e-07	0.687351	5.54837e-05	6.47997e-05	0.391869	5.57514e-05	6.69409e-05	0.404932	0.393521
cg08336300	5	-0.0125574	0.00460926	0.00644198	-0.0125574	0.00460926	0.00644198	0.631938	-0.000178507	8.1151e-05	0.0278288	-0.000165376	0.00010005	0.0983436	0.252978	8.96253e-05	9.98818e-05	0.369551	8.92594e-05	0.00010721	0.40509	0.352739
cg11270278	6	-0.00427905	0.00631251	0.497856	-0.00427905	0.00631251	0.497856	0.998218	-0.000410386	0.000110635	0.000207762	-0.000410386	0.000110635	0.000207762	0.635477	-0.000112204	0.000134845	0.405357	-0.000112204	0.000134845	0.405357	0.988341
cg15378486	6	0.0116682	0.00492103	0.0177354	0.0116682	0.00492103	0.0177354	0.845634	-0.000510187	8.60633e-05	3.06568e-09	-0.000510187	8.60633e-05	3.06568e-09	0.58232	-8.74028e-05	0.000105633	0.407999	-8.74028e-05	0.000105633	0.407999	0.67065
cg18544809	6	0.00517826	0.00526171	0.325047	0.00517826	0.00526171	0.325047	0.993139	-0.000291189	9.17831e-05	0.00151095	-0.000295346	0.000110113	0.00731403	0.275276	9.37255e-05	0.000113585	0.409281	9.37255e-05	0.000113585	0.409281	0.944164
cg13889620	6	0.00901325	0.00405115	0.0260905	0.0109197	0.00648343	0.0921327	0.0569251	8.44603e-05	7.10081e-05	0.234264	0.000123402	0.000138108	0.371577	0.0142742	-5.92376e-05	8.69142e-05	0.495515	-0.00012613	0.000152873	0.409336	0.0262059
cg25194322	6	0.00578855	0.00372749	0.120439	0.00578855	0.00372749	0.120439	0.582629	-0.000211713	6.51025e-05	0.001146	-0.000211713	6.51025e-05	0.001146	0.777442	6.58546e-05	8.0066e-05	0.41079	6.58546e-05	8.0066e-05	0.41079	0.560937
cg25898076	6	0.0122597	0.0050137	0.0144753	0.0122597	0.0050137	0.0144753	0.703813	-8.90281e-05	8.80989e-05	0.312234	-8.90281e-05	8.80989e-05	0.312234	0.984775	-8.86535e-05	0.000108449	0.41366	-8.86535e-05	0.000108449	0.41366	0.838325
cg09143850	6	0.00103728	0.00398482	0.794626	0.00152451	0.00491279	0.756321	0.230891	-0.000302522	7.07466e-05	1.90173e-05	-0.000327415	0.000134034	0.0145745	0.0181121	0.000130124	8.63256e-05	0.131718	0.000101827	0.000125233	0.416157	0.11107
cg16048006	6	0.0111338	0.00421659	0.0082788	0.0111338	0.00421659	0.0082788	0.451918	-0.000140397	7.41266e-05	0.0582234	-0.000140397	7.41266e-05	0.0582234	0.533968	-7.33671e-05	9.03844e-05	0.416951	-7.33671e-05	9.03844e-05	0.416951	0.471456
cg09780767	6	0.000815372	0.00378565	0.829467	0.00115452	0.00410026	0.778272	0.348855	-0.000660446	6.59553e-05	1.329e-23	-0.000631125	0.000106067	2.67746e-09	0.0722245	0.000109506	8.08865e-05	0.175792	8.24424e-05	0.00010162	0.417205	0.221997
cg11466837	6	0.00194599	0.00339562	0.566585	0.00193652	0.00445802	0.664006	0.173904	-0.000264663	6.00836e-05	1.05832e-05	-0.000264663	6.00836e-05	1.05832e-05	0.566463	9.90479e-05	7.30996e-05	0.175426	8.91807e-05	0.000110032	0.417656	0.0820635
cg00661347	5	0.0131526	0.00373195	0.000424589	0.0131526	0.00373195	0.000424589	0.733926	-0.000472157	6.5501e-05	5.66138e-13	-0.000456199	8.03936e-05	1.3904e-08	0.255729	-6.5471e-05	8.08429e-05	0.418024	-6.5471e-05	8.08429e-05	0.418024	0.554701
cg01300684	6	-0.000380477	0.00376592	0.919525	0.00162542	0.00628807	0.796027	0.0368511	-0.000383572	6.59756e-05	6.10535e-09	-0.000371954	0.00011456	0.00116705	0.0374481	0.000208607	8.04546e-05	0.00951831	0.000126431	0.000156131	0.418069	0.00709691
cg03513388	6	0.00545866	0.00422303	0.196152	0.00586878	0.00502826	0.243146	0.262443	-0.000404938	7.38582e-05	4.19011e-08	-0.000404938	7.38582e-05	4.19011e-08	0.653534	0.000105727	9.00601e-05	0.240412	8.89345e-05	0.000109852	0.41818	0.248594
cg16360668	6	-0.00290959	0.0032959	0.377349	-0.00256944	0.00387411	0.50718	0.278859	0.000180533	5.79265e-05	0.00182957	0.00018643	7.00533e-05	0.00778503	0.282117	-5.73028e-05	7.0284e-05	0.414899	-5.78439e-05	7.14863e-05	0.418423	0.404008
cg20744943	6	0.0117235	0.00369891	0.00152738	0.0117235	0.00369891	0.00152738	0.983511	-0.000295873	6.49881e-05	5.2956e-06	-0.000300478	6.88668e-05	1.2819e-05	0.373984	-6.4232e-05	7.96372e-05	0.419922	-6.4232e-05	7.96372e-05	0.419922	0.990981
cg18719787	5	0.0166158	0.00547612	0.00241152	0.0166158	0.00547612	0.00241152	0.672176	-0.000284605	0.000102123	0.00532167	-0.000284605	0.000102123	0.00532167	0.463274	-9.74018e-05	0.000120833	0.420192	-9.74018e-05	0.000120833	0.420192	0.563783
cg20666438	5	-0.00739308	0.00309135	0.016778	-0.00739308	0.00309135	0.016778	0.512317	2.88857e-05	5.48813e-05	0.598658	7.71523e-05	0.000103782	0.457236	0.0208415	5.43432e-05	6.74905e-05	0.420705	5.43432e-05	6.74905e-05	0.420705	0.511059
cg23260578	6	0.00496872	0.00427929	0.245597	0.00496872	0.00427929	0.245597	0.543595	-5.8529e-05	7.52826e-05	0.436889	-5.8529e-05	7.52826e-05	0.436889	0.869925	7.40695e-05	9.19941e-05	0.42073	7.40695e-05	9.19941e-05	0.42073	0.803859
cg01196079	6	0.00223303	0.00407435	0.583644	0.00278269	0.00448056	0.534561	0.332017	-0.000246957	7.13404e-05	0.000536825	-0.000254629	8.64756e-05	0.00323456	0.264678	8.56816e-05	8.73014e-05	0.326373	7.57534e-05	9.43713e-05	0.422138	0.350392
cg22301128	6	-0.00543114	0.00538385	0.313078	-0.00543114	0.00538385	0.313078	0.436959	0.000310376	9.41417e-05	0.000977586	0.00029118	0.000109055	0.00758469	0.301326	-0.000111487	0.000115217	0.333234	-9.99231e-05	0.000124526	0.422305	0.351508
cg07269374	5	0.00529231	0.00424599	0.212608	0.00529231	0.00424599	0.212608	0.718986	-0.000337411	7.47034e-05	6.28197e-06	-0.000353499	0.000100434	0.000431984	0.196977	7.32904e-05	9.16563e-05	0.42393	7.32904e-05	9.16563e-05	0.42393	0.849879
cg10568634	6	0.014126	0.00578241	0.0145688	0.014126	0.00578241	0.0145688	0.642237	-0.000275074	0.000103066	0.00760968	-0.000275074	0.000103066	0.00760968	0.906972	-0.000100312	0.000125652	0.424682	-0.000100312	0.000125652	0.424682	0.696209
cg24711224	6	0.00838469	0.00294453	0.0044057	0.00826302	0.00307867	0.0072756	0.382963	-0.000640039	5.07312e-05	1.71762e-36	-0.000640039	5.07312e-05	1.71762e-36	0.444701	-7.80488e-05	6.27412e-05	0.213507	-6.57598e-05	8.25234e-05	0.425531	0.205001
cg02787737	6	0.0171409	0.00641849	0.0075726	0.0207114	0.00921486	0.0246014	0.116434	0.000212614	0.000113703	0.0614964	0.000212614	0.000113703	0.0614964	0.657398	-4.20876e-05	0.000138166	0.760658	-0.000167784	0.000210733	0.42592	0.0844019
cg24667758	6	0.00223192	0.00329578	0.498275	0.00223192	0.00329578	0.498275	0.469764	-0.00021544	5.77337e-05	0.000190259	-0.000201238	7.25109e-05	0.00551533	0.228116	7.08963e-05	7.08197e-05	0.316787	6.69144e-05	8.40667e-05	0.426051	0.263592
cg14485901	6	0.010828	0.00466068	0.0201649	0.010828	0.00466068	0.0201649	0.860577	-5.62562e-05	8.02004e-05	0.483025	-3.91457e-05	9.75308e-05	0.68815	0.269697	-7.8768e-05	9.91301e-05	0.426851	-7.8768e-05	9.91301e-05	0.426851	0.860881
cg16770368	6	0.0119599	0.00313907	0.000138962	0.0111048	0.00512336	0.0301976	0.0501122	-0.000381318	5.53944e-05	5.83256e-12	-0.000381318	5.53944e-05	5.83256e-12	0.97814	-0.000111161	6.80223e-05	0.10222	-8.78222e-05	0.000110951	0.428627	0.0539445
cg15211996	6	0.00733655	0.00423536	0.0832353	0.00733655	0.00423536	0.0832353	0.772977	-0.00054859	7.40956e-05	1.32328e-13	-0.00054859	7.40956e-05	1.32328e-13	0.59623	7.1966e-05	9.11262e-05	0.429679	7.1966e-05	9.11262e-05	0.429679	0.611513
cg27150412	6	0.000810865	0.00331297	0.806646	0.000796294	0.00457801	0.861913	0.148017	0.000144096	5.75284e-05	0.0122526	0.000144096	5.75284e-05	0.0122526	0.886136	7.75256e-05	7.05251e-05	0.271654	8.18977e-05	0.000104039	0.431174	0.107319
cg15504662	6	-0.00321479	0.0034476	0.351093	-0.00275098	0.00370248	0.457476	0.365155	0.00030654	5.95215e-05	2.60397e-07	0.00030654	5.95215e-05	2.60397e-07	0.611206	-5.43707e-05	7.31569e-05	0.457357	-6.01238e-05	7.64151e-05	0.431396	0.388289
cg26527263	5	0.0106999	0.0040392	0.00807254	0.0106999	0.0040392	0.00807254	0.800217	-0.000226728	7.11285e-05	0.00143468	-0.000204564	0.000146215	0.161793	0.00907983	-6.89389e-05	8.76409e-05	0.431513	-6.89389e-05	8.76409e-05	0.431513	0.727418
cg17875988	6	0.00144113	0.00364983	0.692955	0.00169378	0.00410964	0.680231	0.318005	-0.000408925	6.335e-05	1.08212e-10	-0.000410992	7.09484e-05	6.92088e-09	0.334363	0.00011721	7.81045e-05	0.133437	9.15296e-05	0.000116407	0.431698	0.10022
cg07628580	6	0.000288973	0.00349841	0.934169	0.000951686	0.00406291	0.8148	0.30114	-0.000139405	5.9929e-05	0.0200095	-0.000139405	5.9929e-05	0.0200095	0.675053	0.00011008	7.42772e-05	0.138336	7.76659e-05	9.90218e-05	0.432846	0.19488
cg26121234	6	0.00761958	0.00465825	0.101899	0.00649805	0.00611422	0.287884	0.180658	-5.34803e-05	8.14415e-05	0.511392	-5.34803e-05	8.14415e-05	0.511392	0.556614	7.87938e-05	9.97693e-05	0.429668	9.83241e-05	0.00012541	0.433027	0.222233
cg12797746	6	0.00555799	0.00394923	0.15932	0.0052215	0.00595133	0.380288	0.0846554	-0.000590219	6.9223e-05	1.5106e-17	-0.000621763	0.000101615	9.42725e-10	0.126866	0.000111299	8.44918e-05	0.187747	0.000110189	0.000140971	0.434423	0.0400134
cg25788549	5	-0.00412449	0.00566606	0.466657	-0.00437961	0.00628536	0.485931	0.315639	0.000888276	0.000100191	7.5952e-19	0.000878473	0.000159531	3.65838e-08	0.0827037	-0.00014647	0.000123018	0.233798	-0.000128917	0.000165108	0.434919	0.168705
cg16639691	6	-0.00154058	0.00511542	0.76329	0.00263754	0.0109405	0.809493	0.00167049	-0.000252539	9.06187e-05	0.00532264	-0.000346796	0.000152335	0.0228144	0.0581879	0.000305945	0.000110559	0.00565296	0.000194739	0.000249417	0.434935	0.000747156
cg05235525	6	0.00467982	0.00512873	0.36152	0.00467982	0.00512873	0.36152	0.94146	0.00011835	9.04513e-05	0.190725	0.00011835	9.04513e-05	0.190725	0.683437	8.59315e-05	0.000110491	0.436733	8.59315e-05	0.000110491	0.436733	0.969008
cg10359332	6	0.00219395	0.003368	0.51478	0.0024535	0.00368592	0.505641	0.340022	6.30185e-05	5.91149e-05	0.286408	6.30185e-05	5.91149e-05	0.286408	0.816829	8.37732e-05	7.23699e-05	0.247039	6.97161e-05	8.9742e-05	0.437247	0.236366
cg01174264	6	-0.00275673	0.00293086	0.346916	-0.00275668	0.00293104	0.346955	0.415831	9.22668e-05	5.13159e-05	0.0721743	0.000104614	7.22196e-05	0.147461	0.156254	-5.02437e-05	6.27665e-05	0.423429	-5.36309e-05	6.90707e-05	0.437476	0.341196
cg17535278	6	-0.00512868	0.00220103	0.0197995	-0.00544354	0.00268852	0.0428942	0.25227	0.000153133	3.87523e-05	7.76341e-05	0.000153133	3.87523e-05	7.76341e-05	0.445123	3.84306e-05	4.73281e-05	0.41679	4.41215e-05	5.68728e-05	0.437871	0.279163
cg14378039	6	0.00105477	0.00381612	0.782242	0.00113293	0.00670202	0.865763	0.0203617	-0.000178594	6.67906e-05	0.00749659	-0.000195411	0.00010692	0.0676035	0.0650446	0.000116181	8.15512e-05	0.154261	0.000110852	0.00014297	0.438133	0.020098
cg25874108	6	0.00466796	0.00490677	0.341437	0.00466796	0.00490677	0.341437	0.910955	-0.000227385	8.71689e-05	0.00909249	-0.000227385	8.71689e-05	0.00909249	0.911753	8.27736e-05	0.000106842	0.4385	8.27736e-05	0.000106842	0.4385	0.822995
cg15034393	6	0.00733595	0.00543407	0.177019	0.00733595	0.00543407	0.177019	0.435793	-0.000806778	9.48356e-05	1.78308e-17	-0.000836864	0.000125514	2.60227e-11	0.200993	9.17193e-05	0.000116108	0.429559	9.29251e-05	0.000120763	0.441606	0.385784
cg06754496	6	0.0107176	0.00447545	0.0166312	0.0108104	0.00486802	0.026371	0.343643	-8.41991e-05	7.91649e-05	0.287514	-8.41991e-05	7.91649e-05	0.287514	0.771524	-7.88693e-05	9.65714e-05	0.414103	-8.40972e-05	0.000109556	0.442712	0.305672
cg10005565	6	0.0119282	0.00429971	0.00553415	0.0119282	0.00429971	0.00553415	0.699265	2.26894e-05	7.78135e-05	0.770603	2.26894e-05	7.78135e-05	0.770603	0.419196	-7.16775e-05	9.3441e-05	0.443029	-7.16775e-05	9.3441e-05	0.443029	0.693976
cg19160624	6	0.0119186	0.00444831	0.00737612	0.0119186	0.00444831	0.00737612	0.868983	-0.000393877	7.86848e-05	5.56426e-07	-0.000393877	7.86848e-05	5.56426e-07	0.953455	-7.32827e-05	9.57643e-05	0.444128	-7.32827e-05	9.57643e-05	0.444128	0.854599
cg18395636	6	-0.00857622	0.00748322	0.25177	-0.00857622	0.00748322	0.25177	0.473689	0.00123141	0.000132027	1.08973e-20	0.00123068	0.000134386	5.29794e-20	0.403848	-0.000167712	0.000161004	0.29757	-0.000149052	0.000195289	0.445322	0.255064
cg02244386	6	0.0146878	0.00455717	0.00126855	0.014301	0.00862178	0.0971746	0.0103734	-0.000652282	7.99865e-05	3.49443e-16	-0.00064483	0.000102565	3.23621e-10	0.228865	-0.000145309	9.79309e-05	0.137864	-0.00014481	0.000189953	0.445853	0.00808818
cg14165911	6	0.00187363	0.00509217	0.712916	0.00160334	0.00616488	0.794805	0.241303	-0.000267515	9.09443e-05	0.00326599	-0.000312391	0.000144022	0.0300788	0.0780351	0.00011771	0.000109725	0.283375	0.000122147	0.000160456	0.44651	0.0974098
cg15068641	6	0.00264766	0.00350073	0.44946	0.00267557	0.00365036	0.463583	0.380007	-4.16328e-05	6.16123e-05	0.499216	-4.16328e-05	6.16123e-05	0.499216	0.904193	7.32663e-05	7.52284e-05	0.330097	6.96785e-05	9.18907e-05	0.448286	0.244647
cg25076881	6	0.00625586	0.00461962	0.175675	0.00532684	0.00603393	0.377336	0.189492	-0.000244134	8.07755e-05	0.00250802	-0.000270997	0.000110382	0.0140848	0.179463	7.52054e-05	9.9468e-05	0.449604	7.627e-05	0.00010089	0.449667	0.405227
cg11077392	6	0.00630716	0.00499443	0.206647	0.00630716	0.00499443	0.206647	0.624236	-0.0002935	8.87209e-05	0.000939235	-0.0002935	8.87209e-05	0.000939235	0.703836	8.11492e-05	0.00010794	0.452173	8.11492e-05	0.00010794	0.452173	0.613701
cg11201256	6	0.00389911	0.0031182	0.21114	0.00389911	0.0031182	0.21114	0.825391	-5.02913e-05	5.41592e-05	0.353105	-5.19916e-05	5.84239e-05	0.373518	0.362952	5.0001e-05	6.66135e-05	0.452885	5.0001e-05	6.66135e-05	0.452885	0.601339
cg01768001	6	-0.00718903	0.00311625	0.0210578	-0.00718903	0.00311625	0.0210578	0.659916	9.75747e-05	5.47732e-05	0.0748417	9.75747e-05	5.47732e-05	0.0748417	0.68599	5.0267e-05	6.71609e-05	0.454185	5.0267e-05	6.71609e-05	0.454185	0.451576
cg01205087	6	0.0126295	0.00423355	0.00285256	0.0127806	0.00633788	0.0437436	0.0857054	0.000104578	7.50414e-05	0.163437	0.000104578	7.50414e-05	0.163437	0.856668	-0.000104514	9.10842e-05	0.2512	-0.000105868	0.000141717	0.45504	0.0705057
cg11229975	6	0.00567146	0.00448989	0.206531	0.00567146	0.00448989	0.206531	0.523062	-0.000282189	8.15261e-05	0.000537511	-0.000281195	8.66473e-05	0.00117331	0.368441	7.8041e-05	9.84237e-05	0.427831	7.68615e-05	0.000102893	0.455061	0.375269
cg25210796	6	0.00344959	0.00423378	0.4152	0.00357134	0.00723337	0.621496	0.0274973	-0.000309756	7.5124e-05	3.73541e-05	-0.00030707	0.000102729	0.00279767	0.170758	0.000113697	9.10992e-05	0.212011	9.99431e-05	0.000134398	0.457099	0.0939852
cg12916055	6	0.00388183	0.00341182	0.255221	0.00388183	0.00341182	0.255221	0.918234	-0.0002474	5.92082e-05	2.93484e-05	-0.0002474	5.92082e-05	2.93484e-05	0.798377	5.41022e-05	7.27987e-05	0.457375	5.41022e-05	7.27987e-05	0.457375	0.639525
cg02538169	6	-0.00900601	0.00317419	0.00455026	-0.00900601	0.00317419	0.00455026	0.674234	0.000120439	5.49811e-05	0.0284845	0.000120439	5.49811e-05	0.0284845	0.581299	5.00736e-05	6.73921e-05	0.457471	5.00736e-05	6.73921e-05	0.457471	0.805116
cg18587465	6	0.00090133	0.00418853	0.829619	0.00234126	0.00562023	0.676987	0.157204	-0.000122438	7.3573e-05	0.0960799	-0.000122438	7.3573e-05	0.0960799	0.715145	0.000124208	8.95899e-05	0.165624	8.81892e-05	0.000119022	0.458723	0.168421
cg11953516	6	0.00488183	0.00537673	0.363902	0.00488183	0.00537673	0.363902	0.452386	-0.000464904	9.44428e-05	8.54046e-07	-0.000488479	0.000149345	0.00107242	0.0862919	8.59336e-05	0.000116147	0.459378	8.59336e-05	0.000116147	0.459378	0.561304
cg10620434	6	0.000993234	0.0026784	0.710763	0.00132177	0.0031203	0.671854	0.287656	-0.00019784	4.65198e-05	2.11107e-05	-0.000192372	5.093e-05	0.000158612	0.353293	6.31202e-05	5.68814e-05	0.267136	5.18012e-05	7.01123e-05	0.460009	0.242634
cg08550394	5	0.0149601	0.00595705	0.0120277	0.0149601	0.00595705	0.0120277	0.523199	0.00111269	0.000105704	6.52255e-26	0.00111269	0.000105704	6.52255e-26	0.611365	-9.50218e-05	0.00012863	0.460075	-9.50218e-05	0.00012863	0.460075	0.691754
cg22033586	5	-0.00959507	0.00600016	0.10979	-0.00959507	0.00600016	0.10979	0.611558	0.000964759	0.00010535	5.30293e-20	0.000964759	0.00010535	5.30293e-20	0.758619	-0.000128952	0.000129065	0.317733	-0.000106505	0.000145652	0.464638	0.313673
cg12399197	6	0.0120669	0.00550765	0.0284571	0.0120669	0.00550765	0.0284571	0.420374	-6.76723e-05	9.65398e-05	0.483317	-0.000244062	0.00019484	0.210343	0.00899103	-0.000105707	0.000118899	0.373979	-0.000104092	0.000143193	0.467267	0.262938
cg04642165	6	-0.0105886	0.00489045	0.0303747	-0.0117333	0.00622029	0.0592559	0.208385	0.00019197	8.50026e-05	0.023921	0.000201288	0.000130205	0.122122	0.0969971	7.16534e-05	0.00010403	0.490962	9.06063e-05	0.000125262	0.469476	0.262153
cg19853143	6	-0.0172037	0.00739914	0.0200672	-0.0172037	0.00739914	0.0200672	0.800537	0.000129543	0.000128976	0.315188	0.000129543	0.000128976	0.315188	0.666511	0.00011398	0.000158234	0.471326	0.00011398	0.000158234	0.471326	0.899733
[truncated: 460 more rows]

## Sheet: Supplementary Table 6
Supplementary Table 6: Results of an interaction between sex and DNA methylation for schizophrenia-associated DMPs.
[truncated: 1,049 more rows]

## Sheet: Supplementary Table 7
Supplementary Table 7: Overlap between schizophrenia-associated DMPs and DMPs for other traits in the online EWAS catalog (http://ewascatalog.org/).
[truncated: 326 more rows]

[truncated: 7 more sheets: Supplementary Table 8, Supplementary Table 9, Supplementary Table 10, Supplementary Table 11, Supplementary Table 12, Supplementary Table 13, Supplementary Table 14]
