# Supplementary figures and images for: DNA methylation meta-analysis reveals cellular alterations in psychosis and markers of treatment-resistant schizophrenia
Source: eLife journal article supplement (doi:10.7554/elife.58430), 2021-02-26

cg04173586

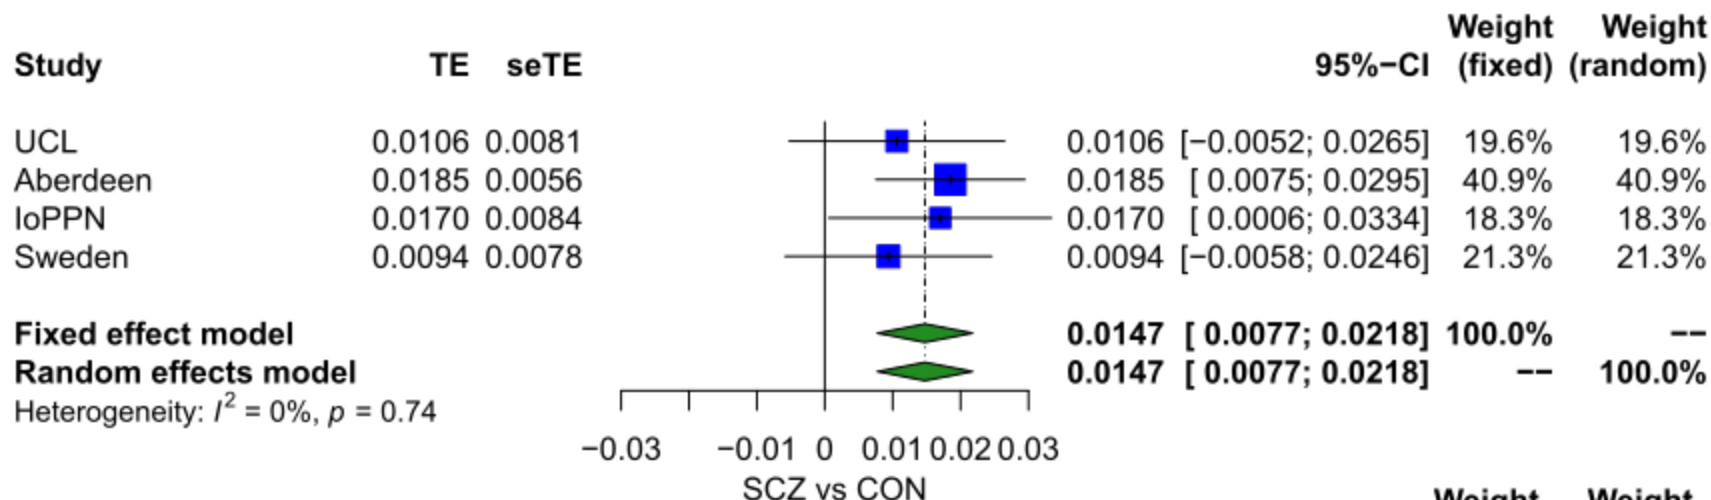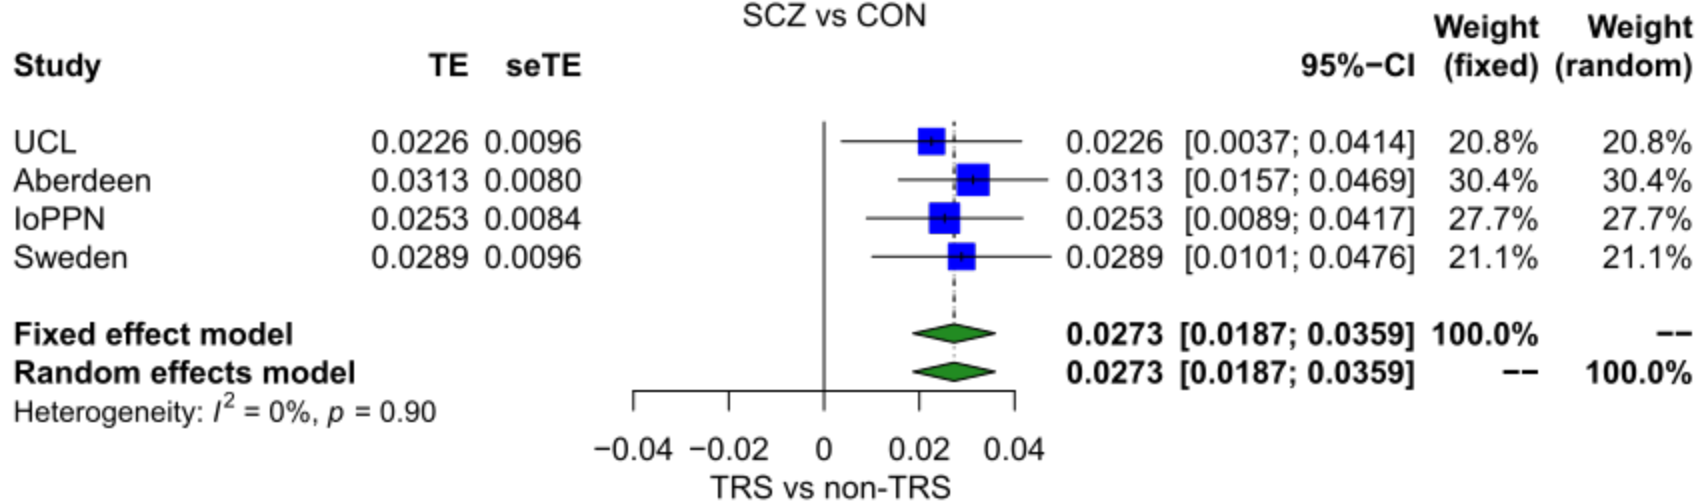

Supplement: supp [file elife-58430-supp-v1.zip]

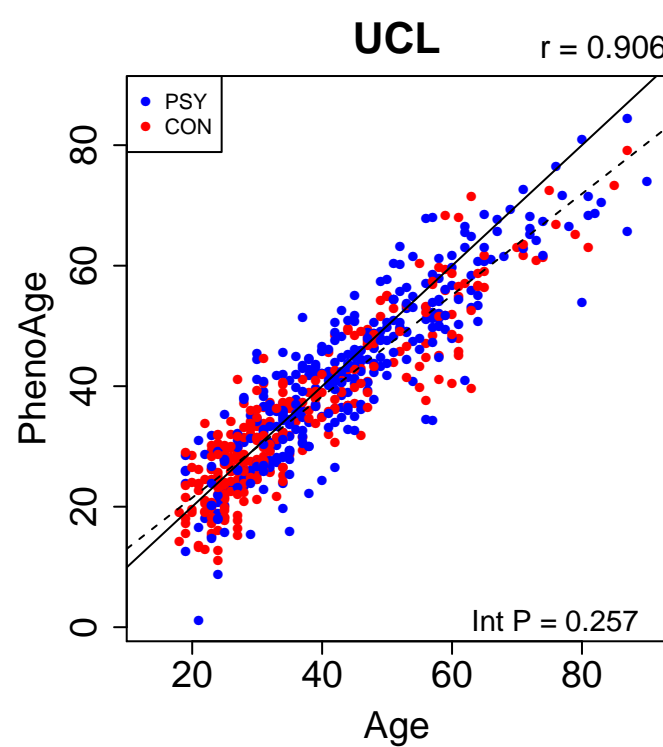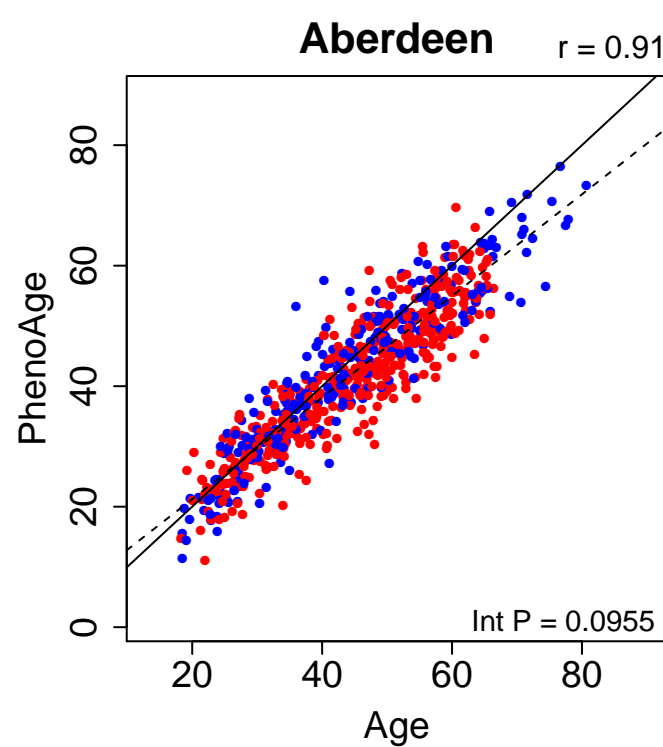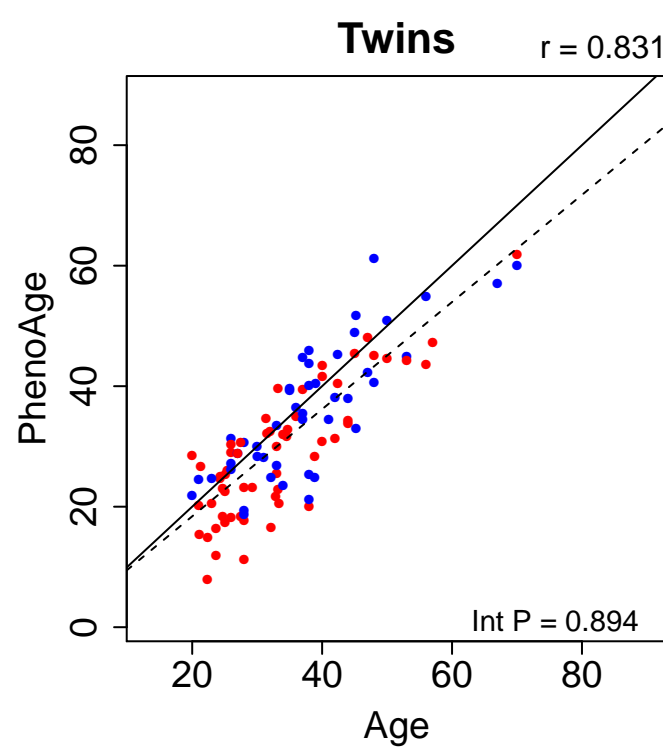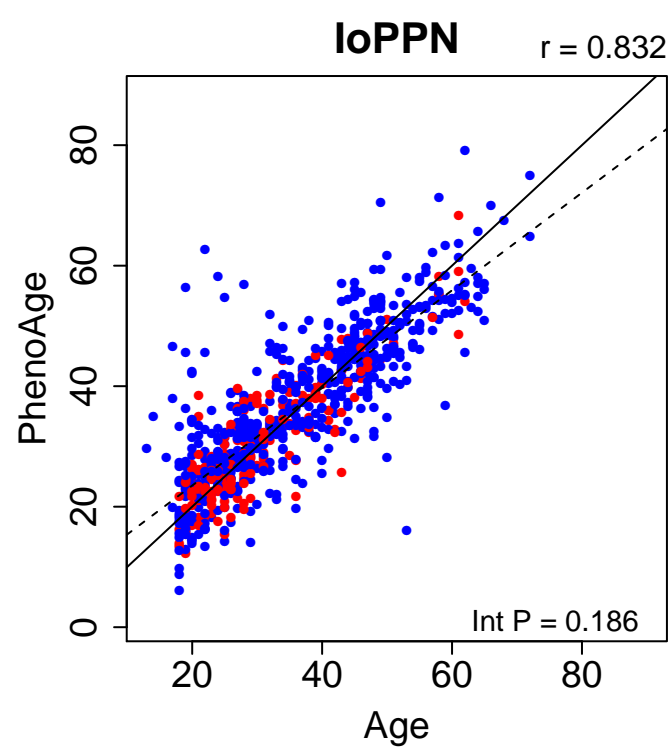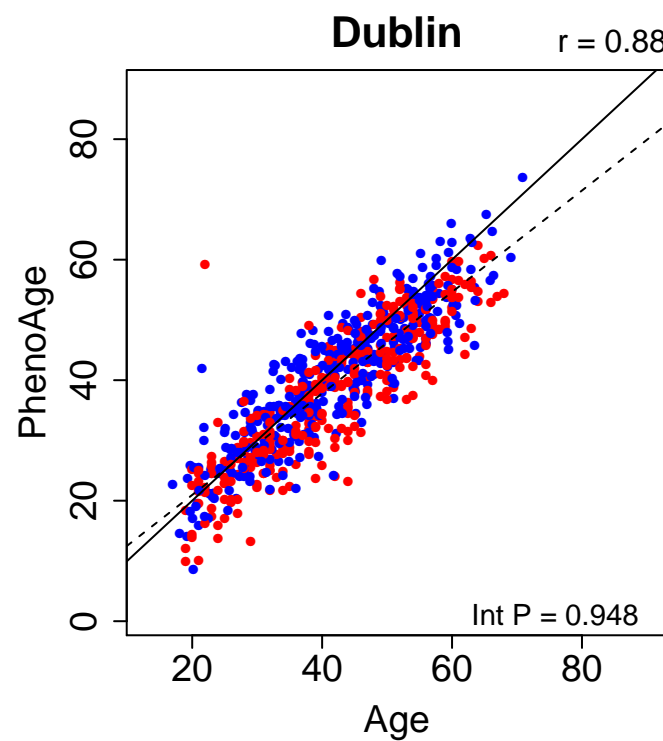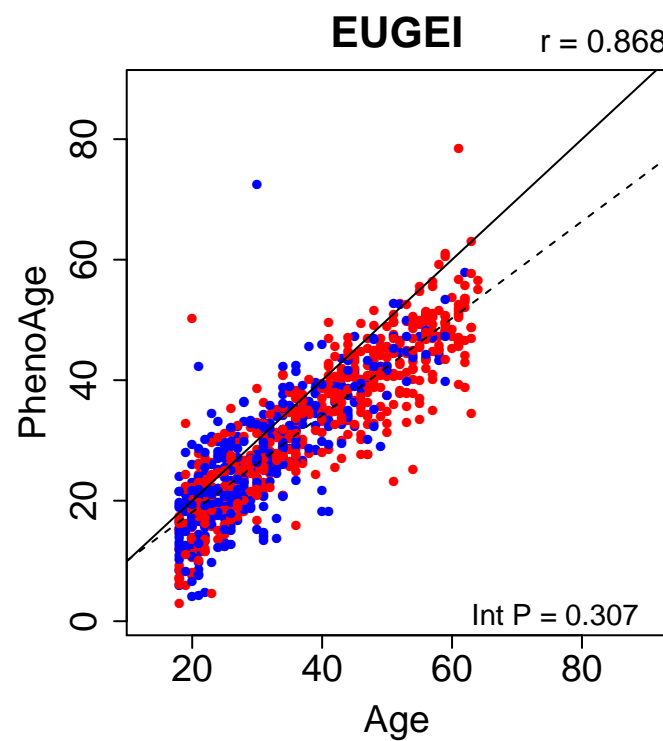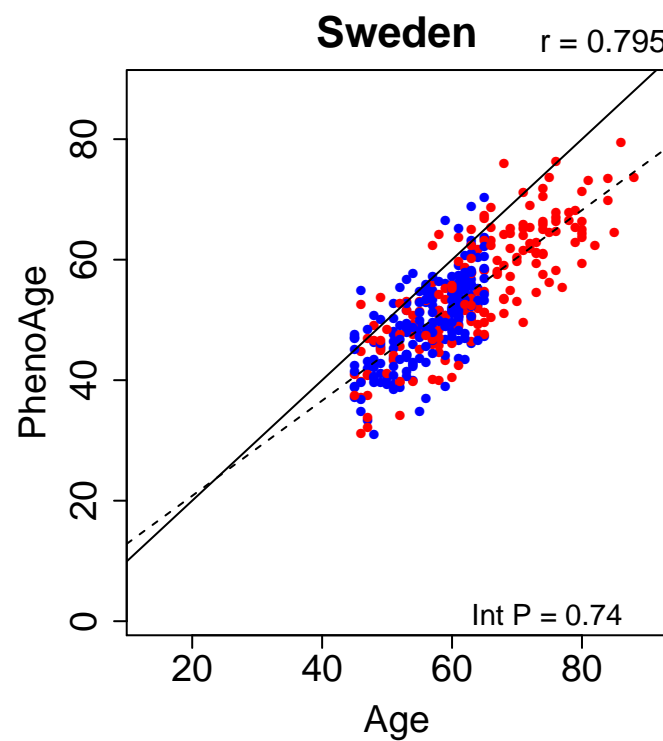

Supplement: supp [file elife-58430-supp-v1.zip]

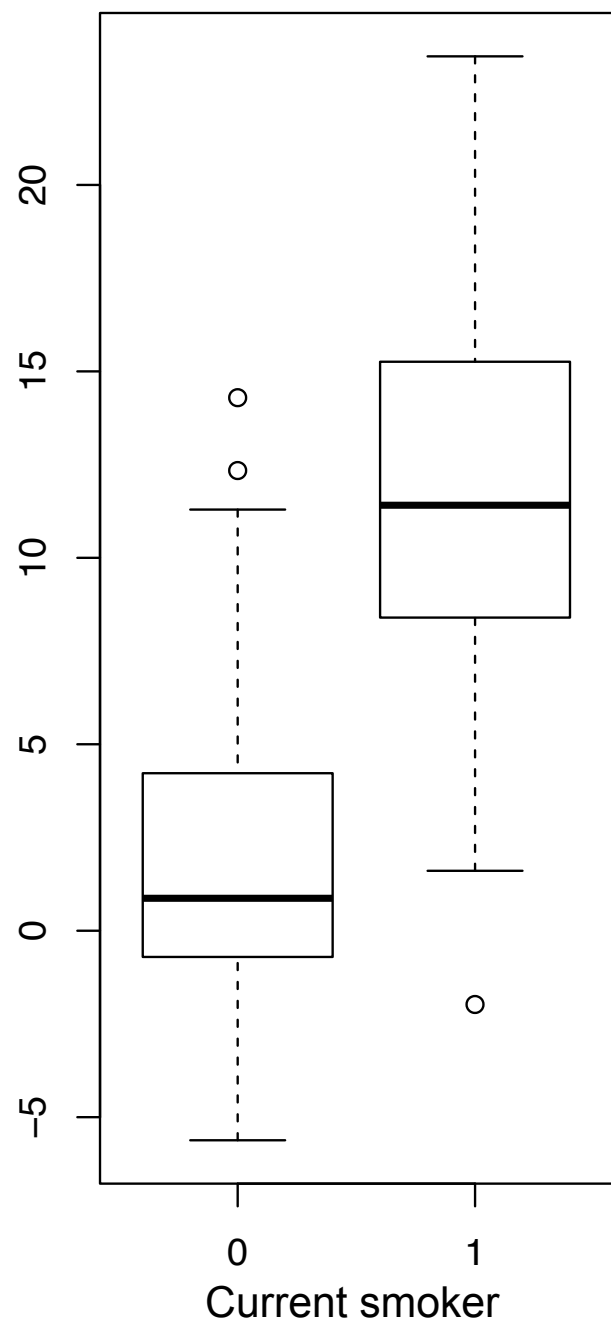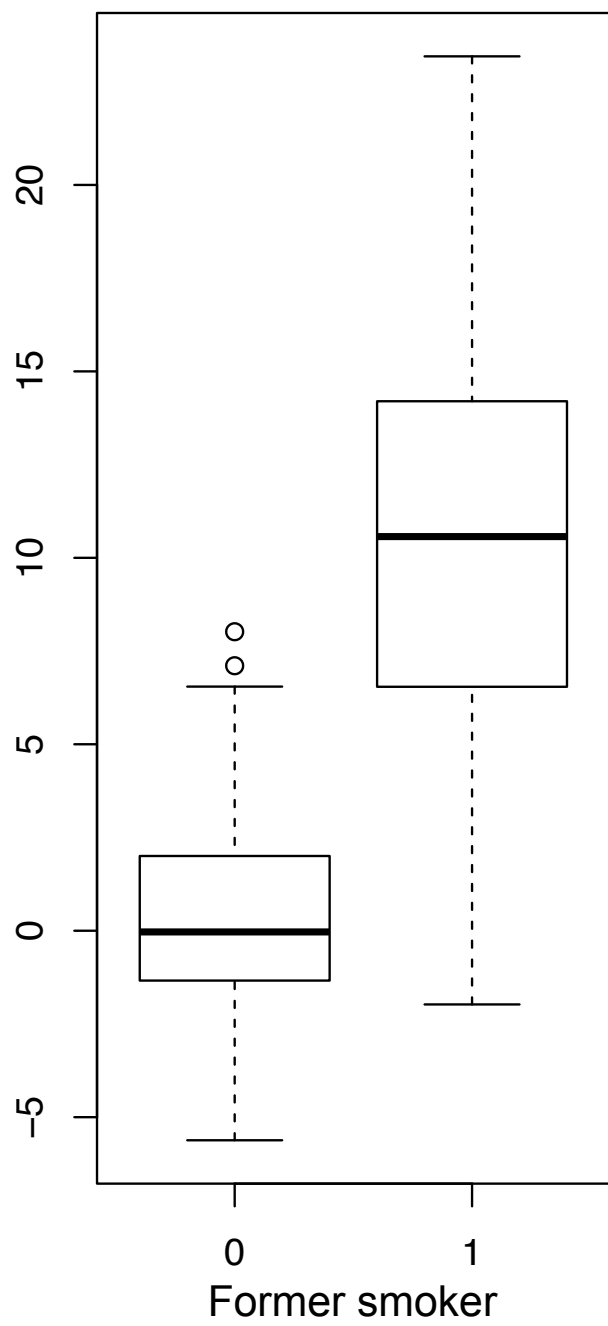

Supplement: supp [file elife-58430-supp-v1.zip]

UCL

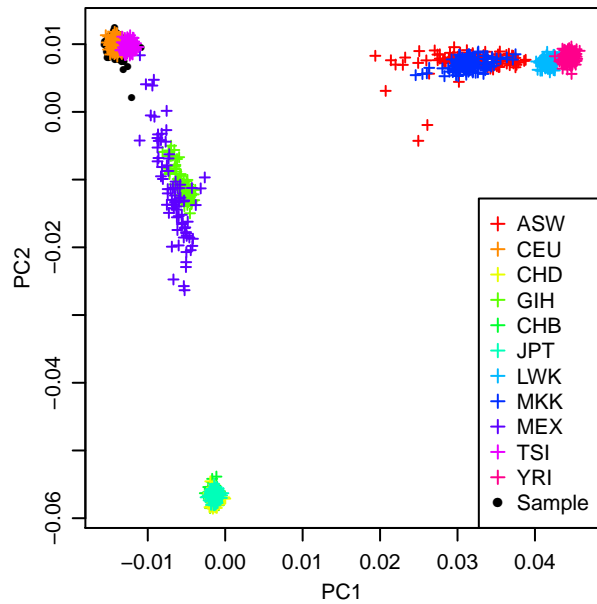

Aberdeen

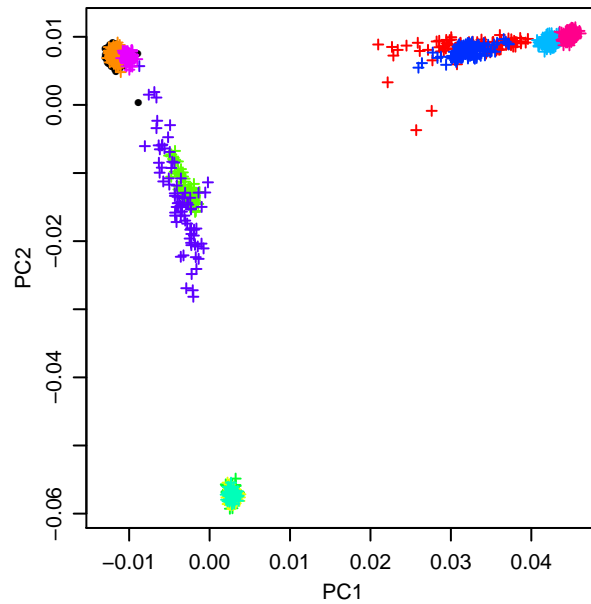

Twins

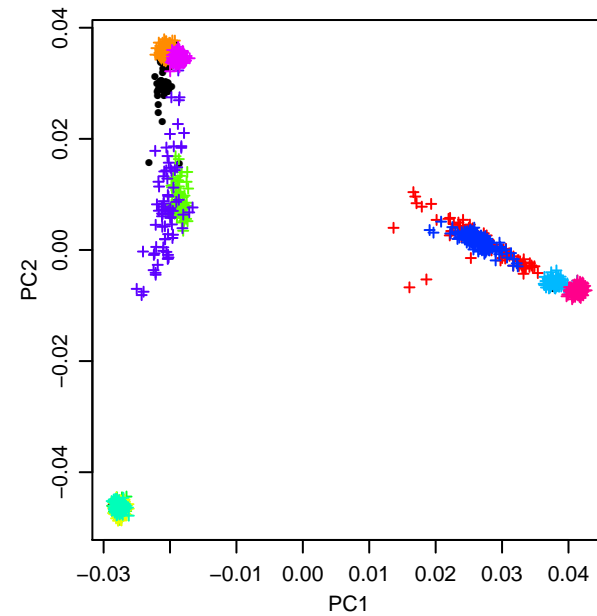

IoPPN

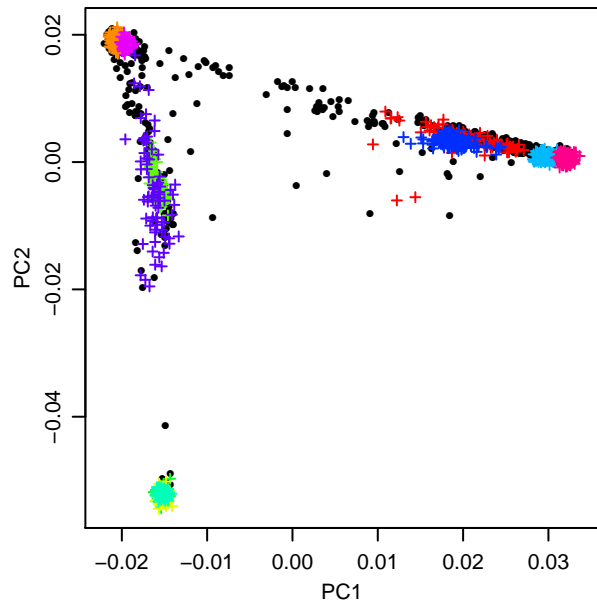

Dublin

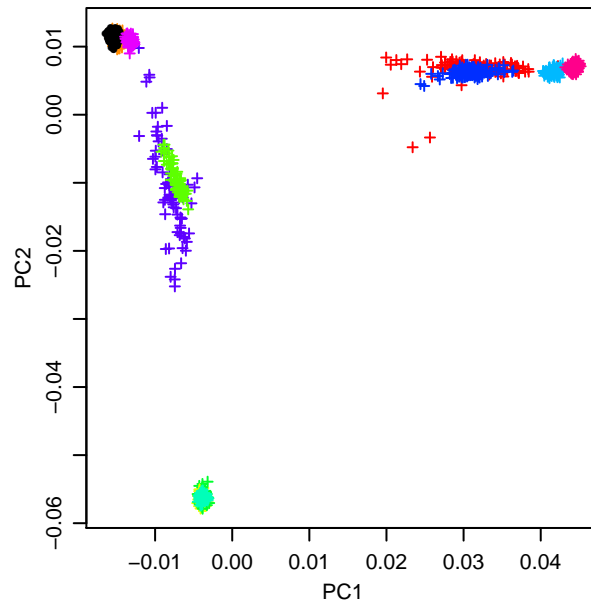

EuGEI

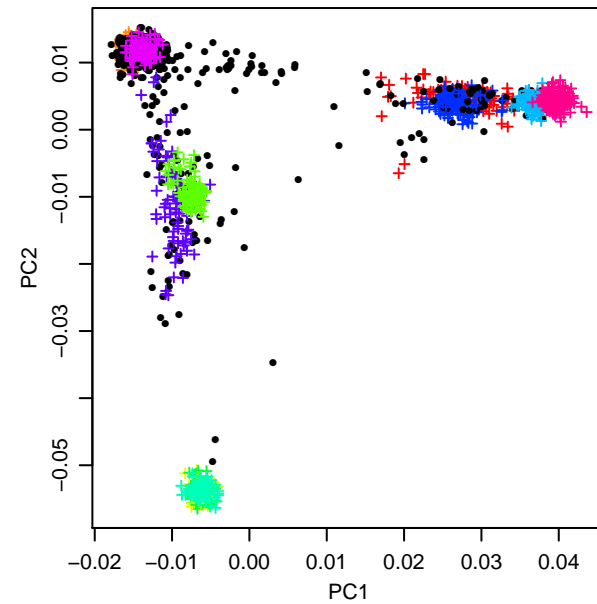

Supplement: supp [file elife-58430-supp-v1.zip]

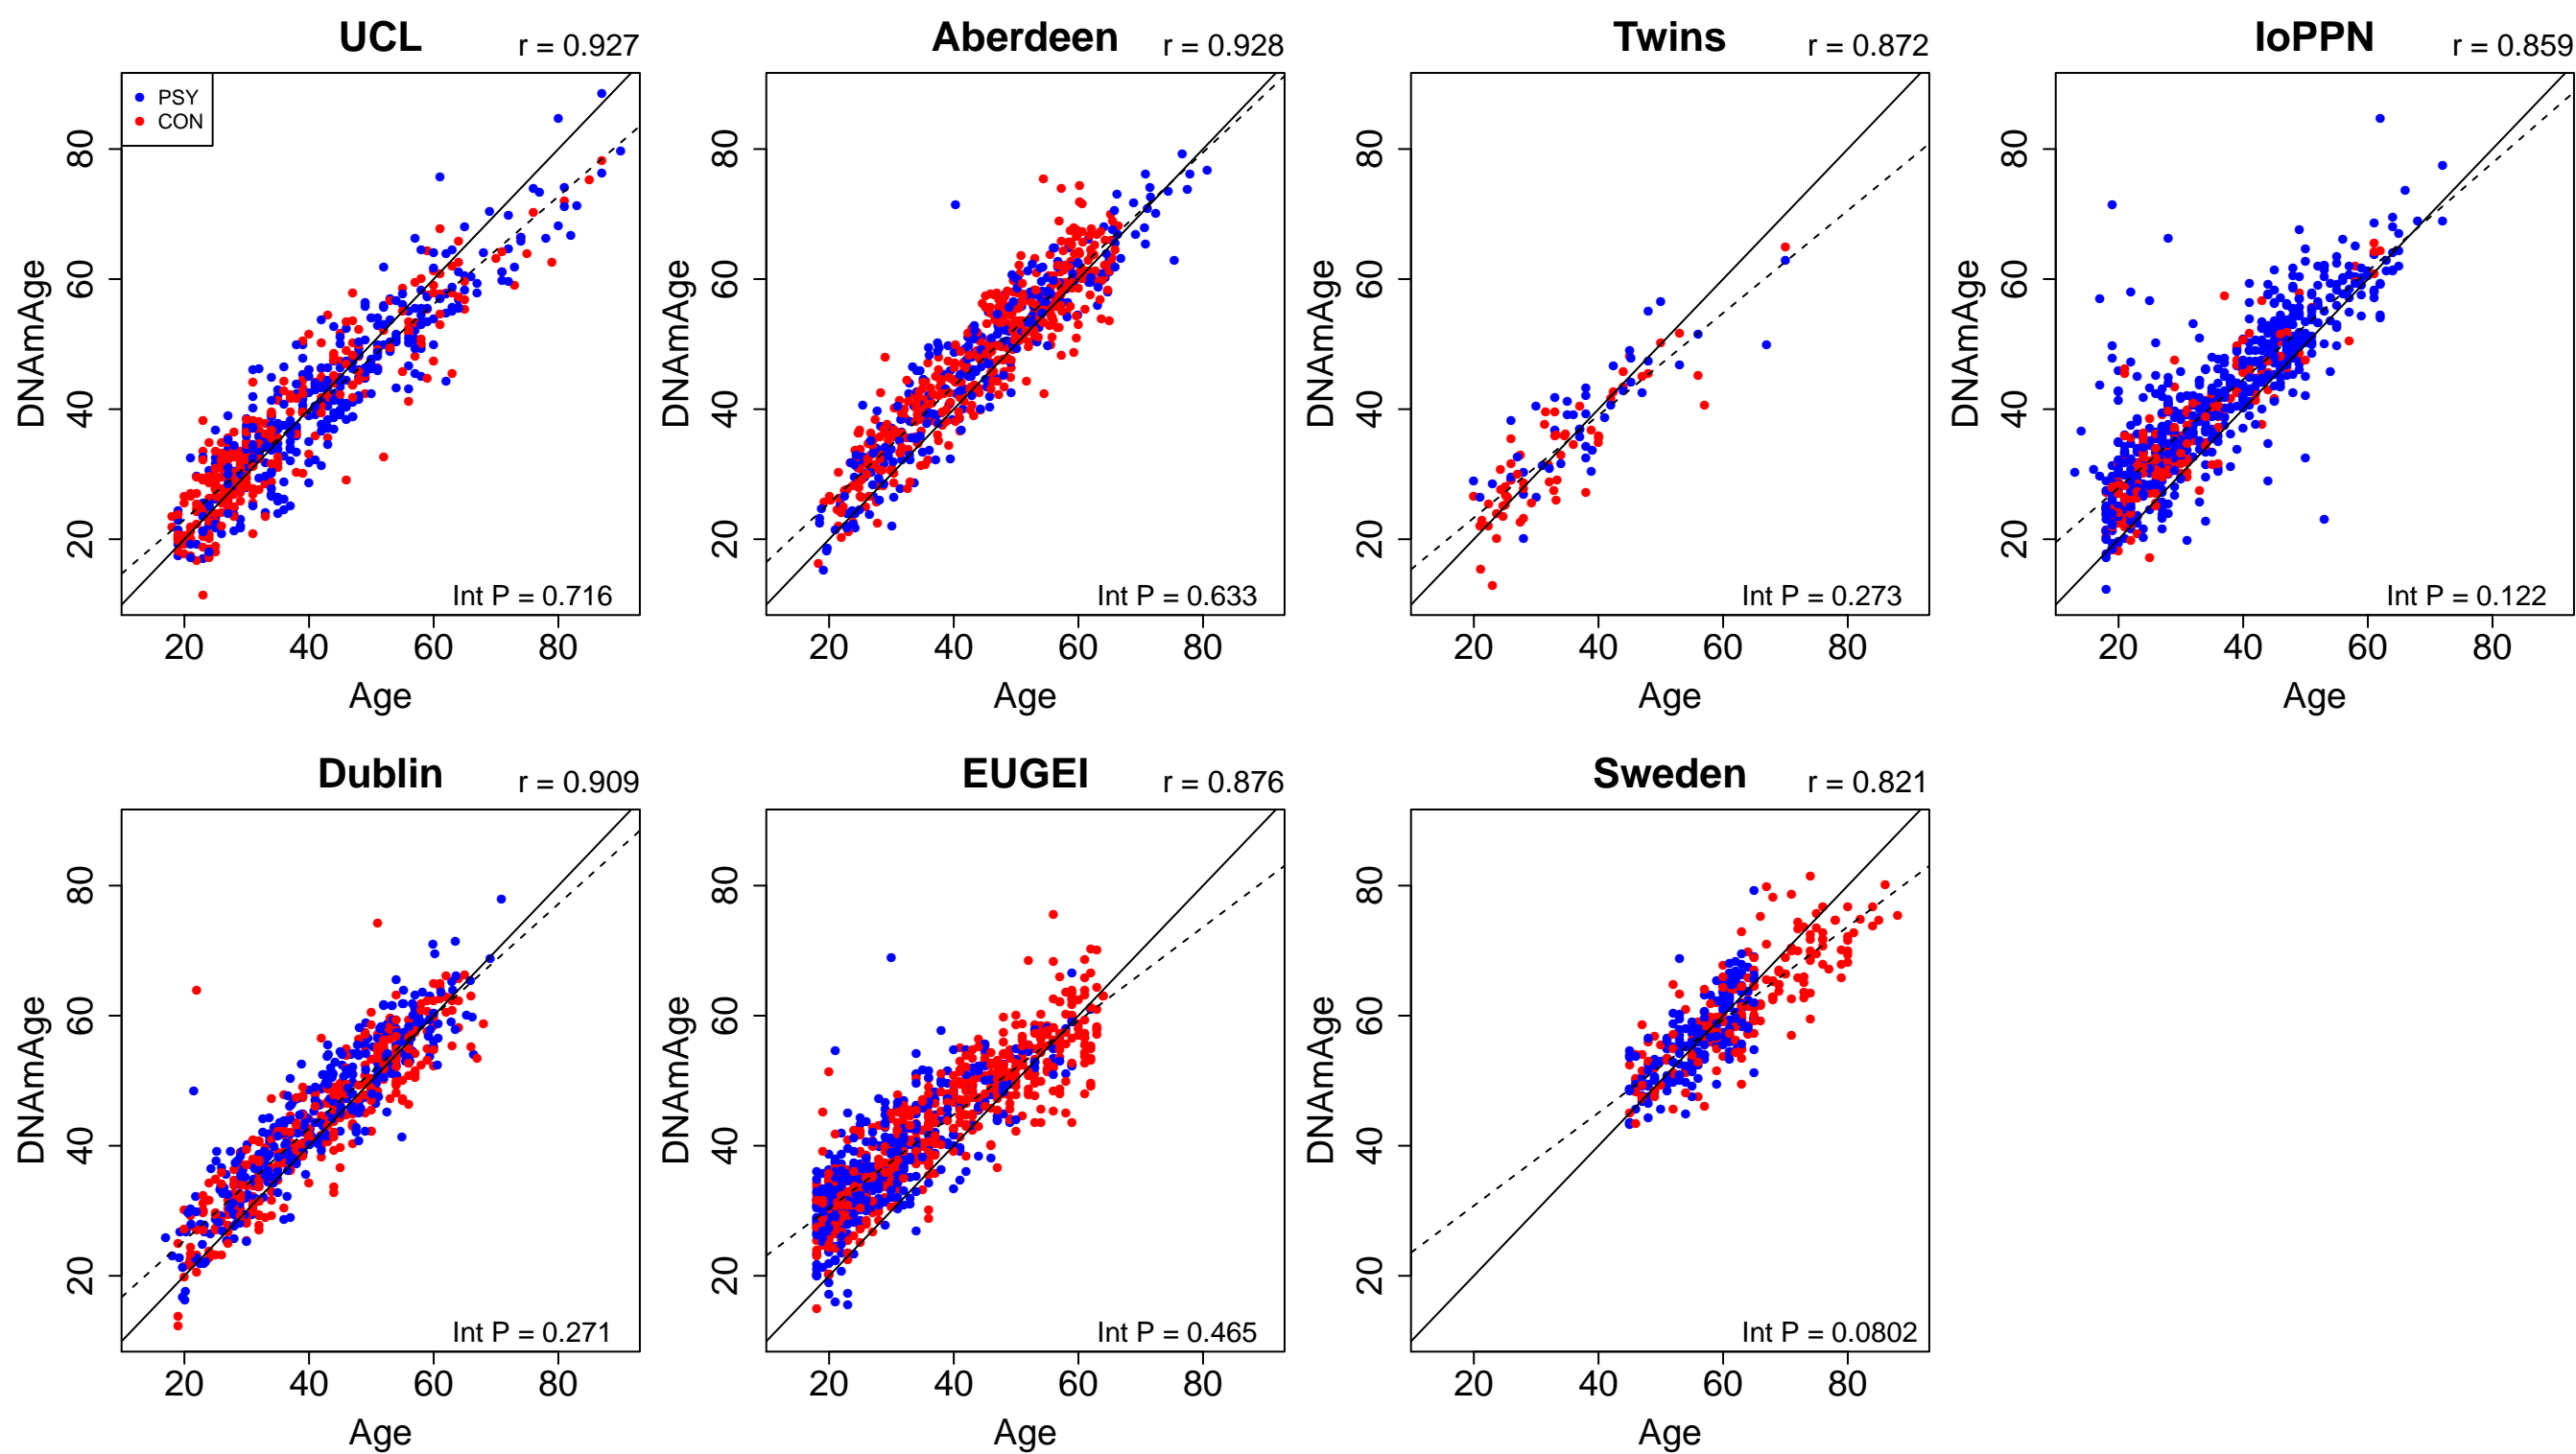

Supplement: supp [file elife-58430-supp-v1.zip]

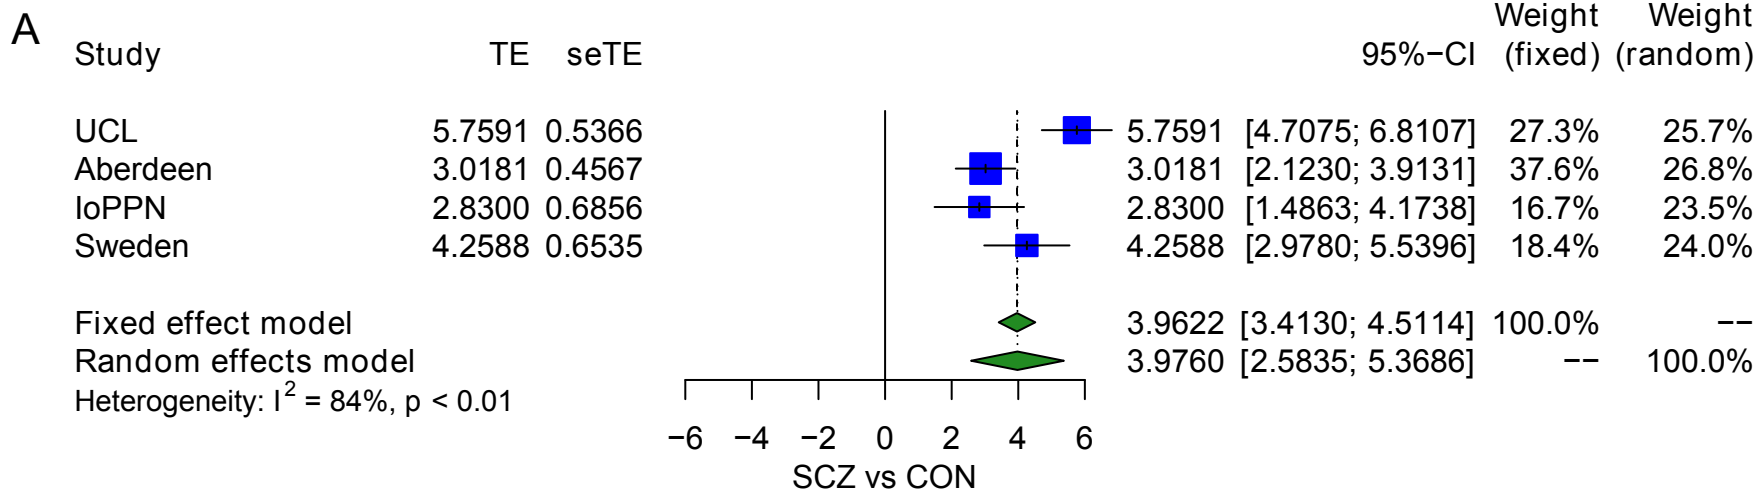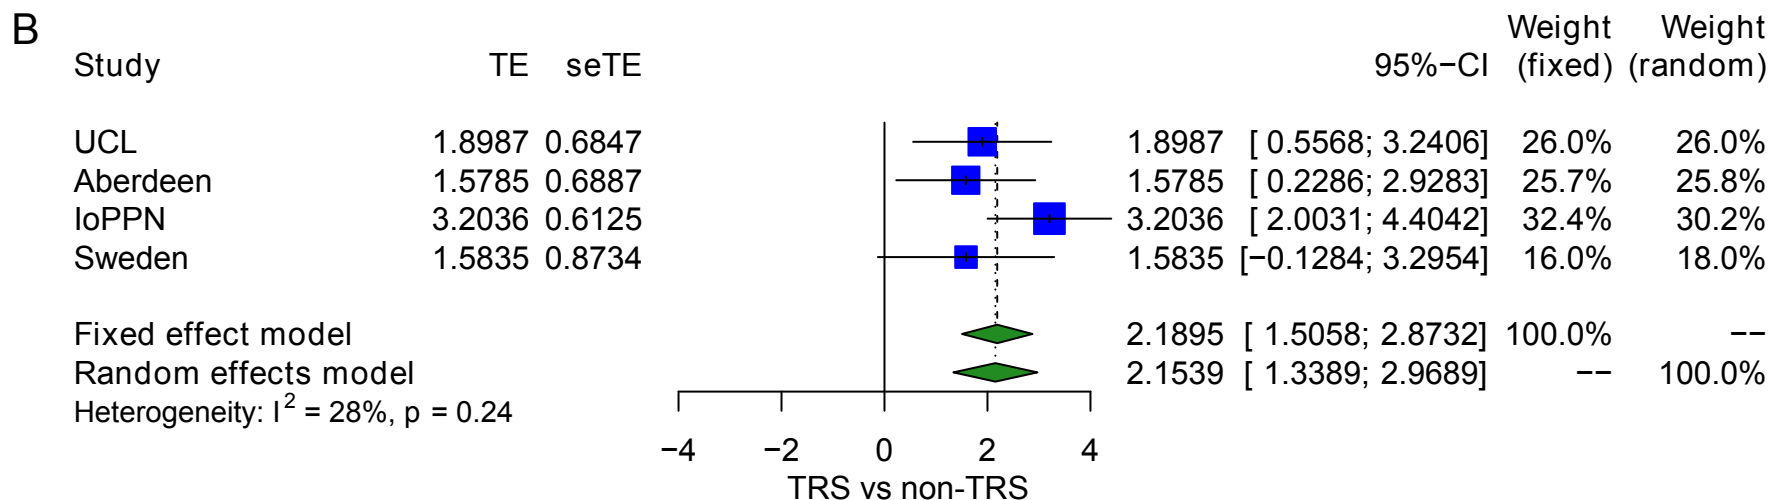

Supplement: supp [file elife-58430-supp-v1.zip]

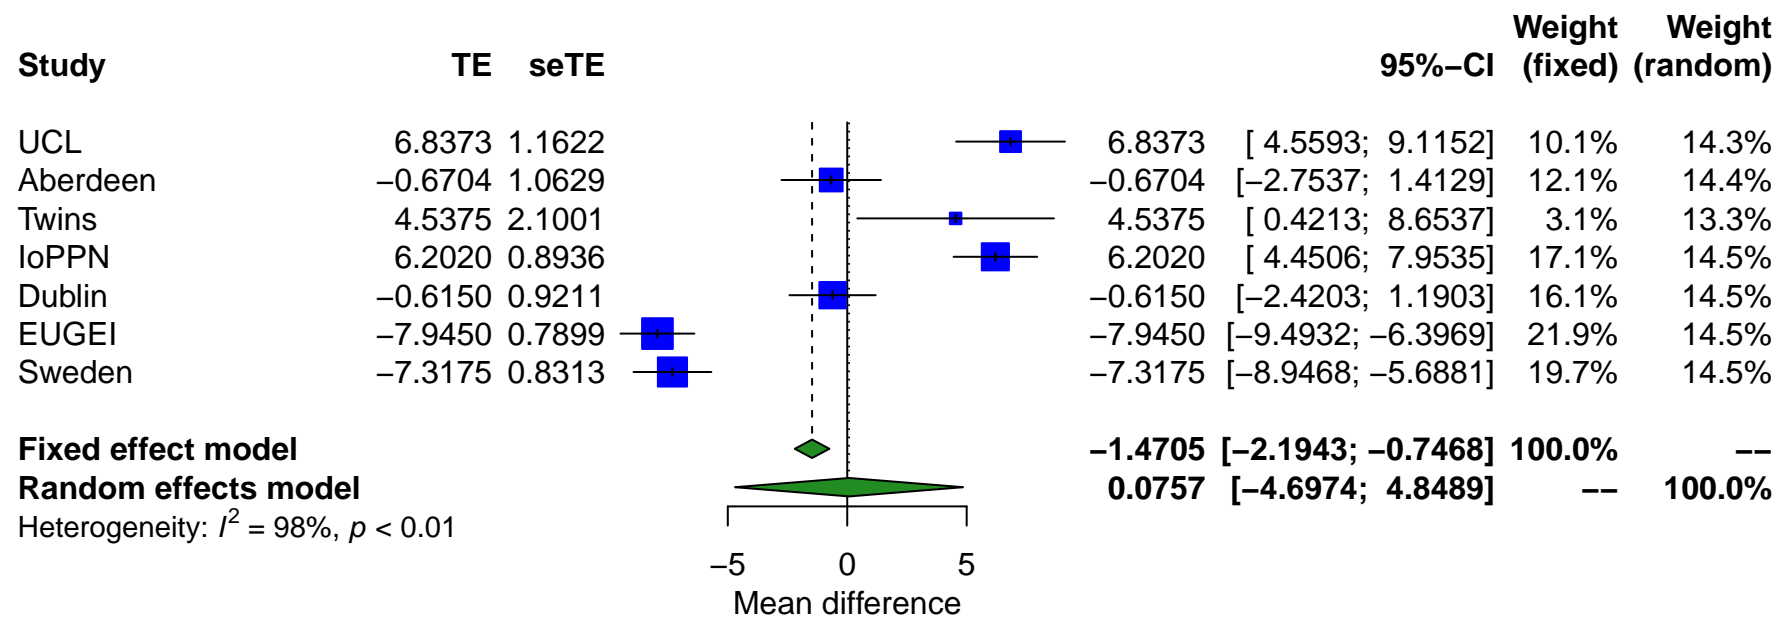

Supplement: supp [file elife-58430-supp-v1.zip › elife_poa_e58430_Figure_1_figure_supplement_1.pdf]

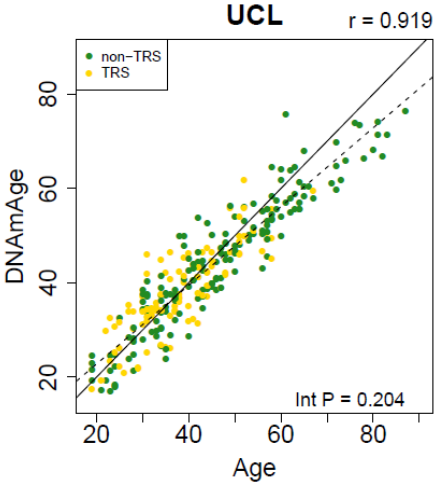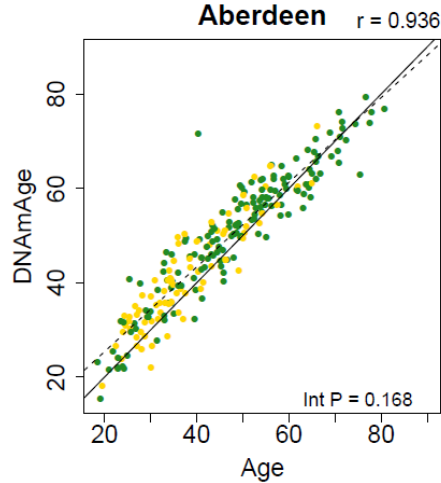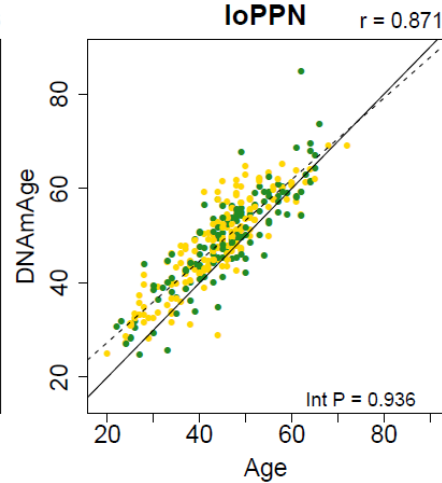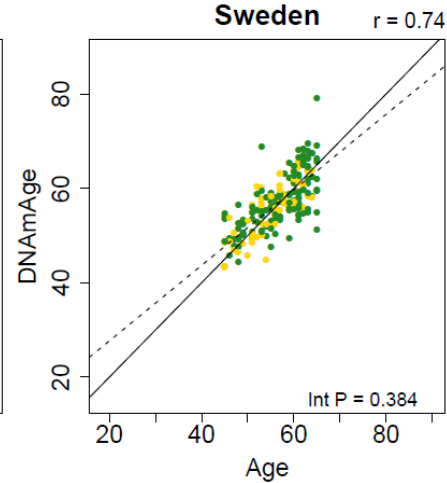

Supplement: supp [file elife-58430-supp-v1.zip › elife_poa_e58430_Figure_1_figure_supplement_5.pdf]

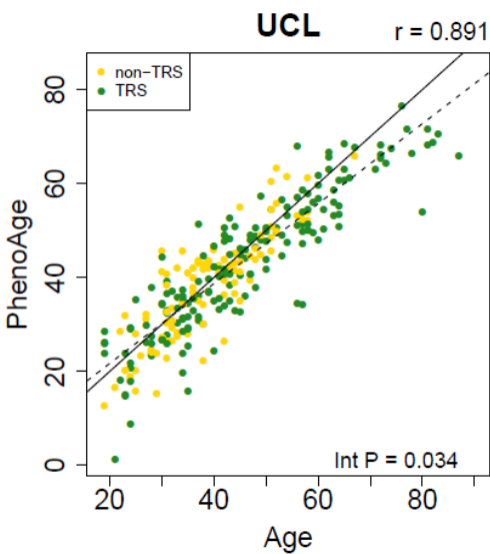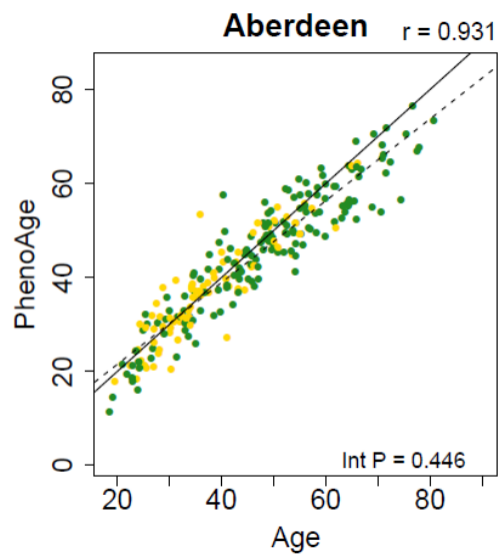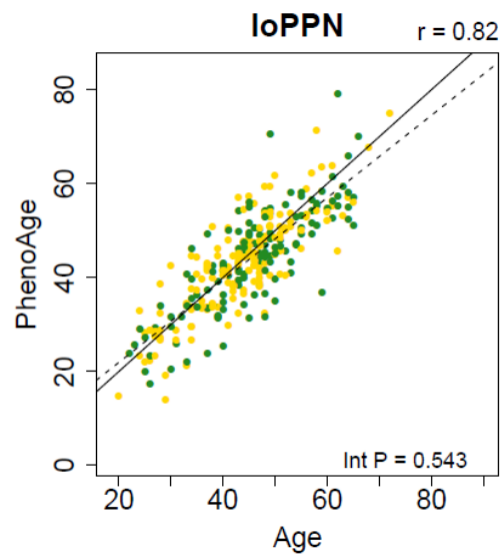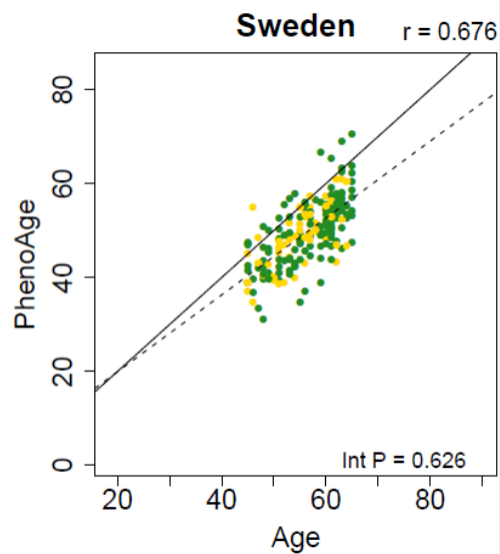

Supplement: supp [file elife-58430-supp-v1.zip › elife_poa_e58430_Figure_1_figure_supplement_6.pdf]

## Granulocytes

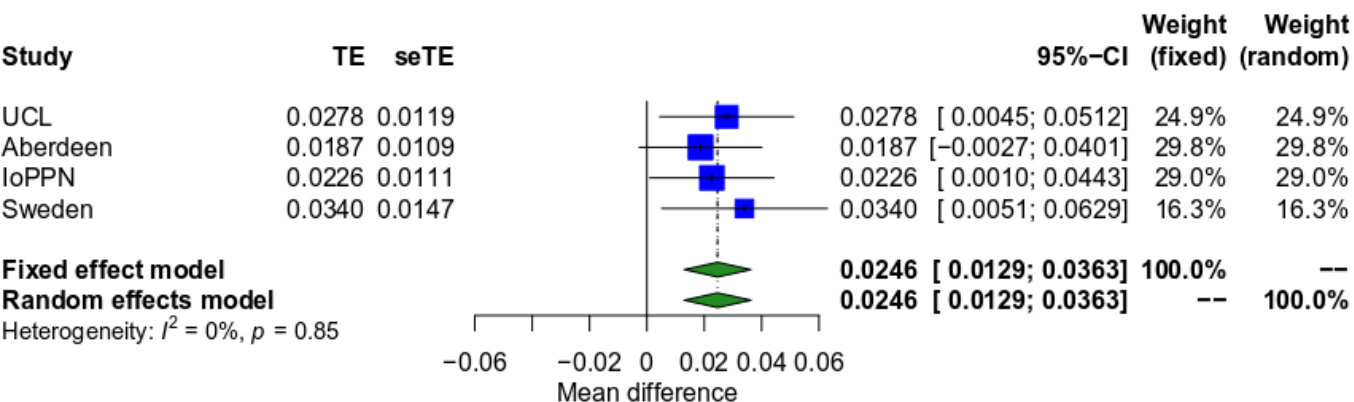

## CD8<sup>+</sup>T-cells

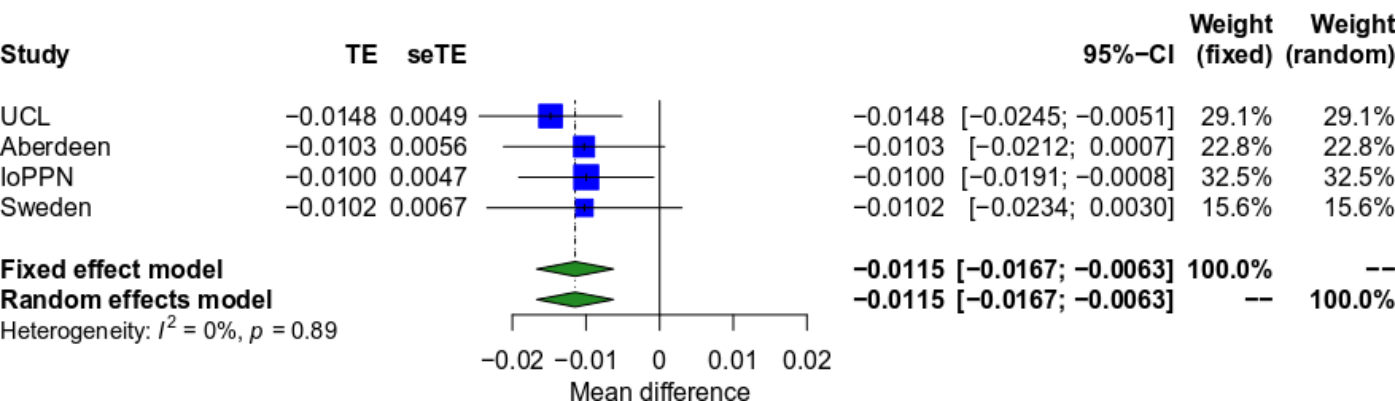

Supplement: supp [file elife-58430-supp-v1.zip › elife_poa_e58430_Figure_2_figure_supplement_1.pdf]

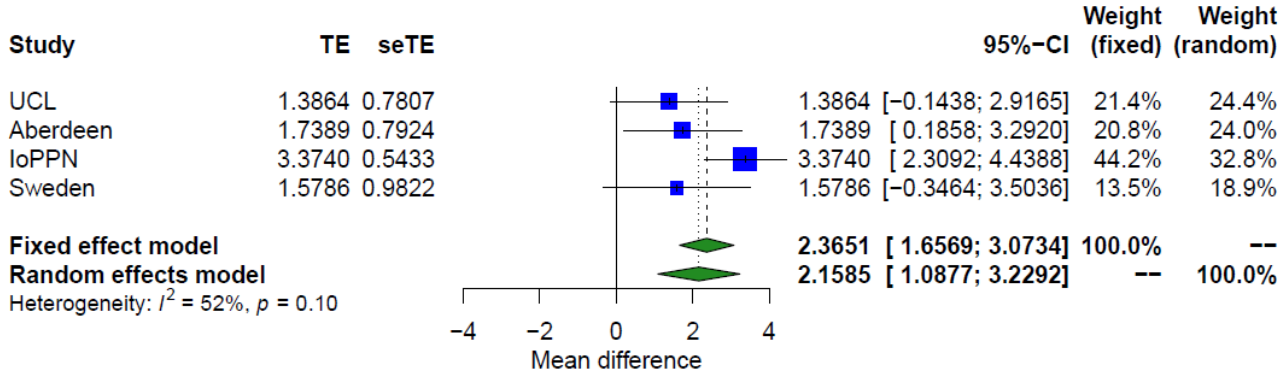

Supplement: supp [file elife-58430-supp-v1.zip › elife_poa_e58430_Figure_3_figure_supplement_2.pdf]

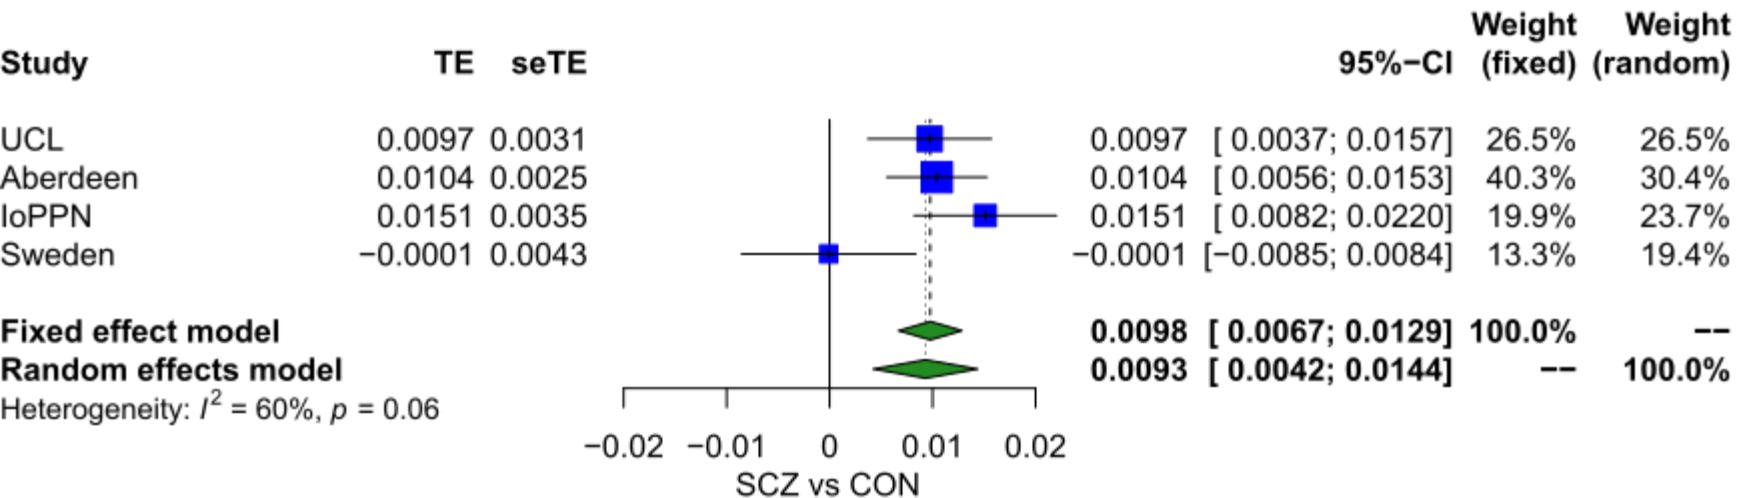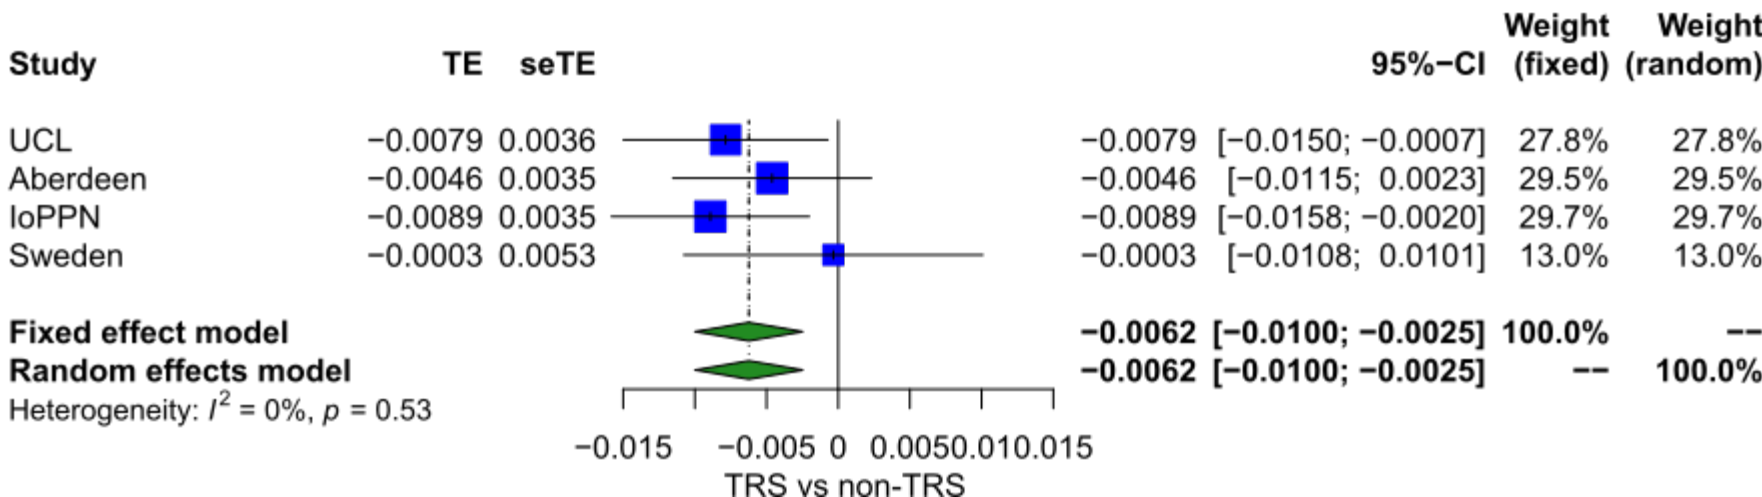

Supplement: supp [file elife-58430-supp-v1.zip › elife_poa_e58430_Figure_8_figure_supplement_2.pdf]
